# Supplementary material for: (Fluoro)alkylation of alkenes promoted by photolysis of alkylzirconocenes
Source: Royal Society of Chemistry journal article supplement (doi:10.1039/d1sc07061d), 2022-01-01

*Supporting Information*

**(Fluoro)alkylation of Alkenes Promoted by Photolysis of  
Alkylzirconocenes**

Xiaoxiao Ren,<sup>a</sup> Xing Gao,<sup>b</sup> Qiao-Qiao Min,<sup>b</sup> Shu Zhang,<sup>c</sup> and Xingang Zhang<sup>\*ab</sup>

<sup>a</sup>*Green Catalysis Center, and College of Chemistry, Zhengzhou University, Zhengzhou 450001, P. R. China.*

<sup>b</sup>*Key Laboratory of Organofluorine Chemistry, Shanghai Institute of Organic Chemistry, University of Chinese Academy of Sciences, Chinese Academy of Sciences, 345 Lingling Road, Shanghai 200032, China.*

<sup>c</sup>*The Yangtze Delta Region Institute (Huzhou), University of Electronic Science and Technology of China, Huzhou 313001, China.*

*xgzhang@mail.sioc.ac.cn*

## Table of Contents

|                                                                                                                                                                                    |     |
|------------------------------------------------------------------------------------------------------------------------------------------------------------------------------------|-----|
| 1. General Information and Materials.....                                                                                                                                          | S3  |
| 2. Optimization of the Reaction Conditions.....                                                                                                                                    | S10 |
| 3. Mechanistic Studies.....                                                                                                                                                        | S14 |
| 3.1 Preparation of <b>2a</b> from the reaction of Grignard reagent <b>7</b> with ZrCp <sub>2</sub> Cl <sub>2</sub> and using <b>2a</b> to react with <b>1a</b> .....               | S14 |
| 3.2 Preparation of <b>2a</b> from the reaction of Grignard reagent <b>7</b> with ZrCp <sub>2</sub> Cl <sub>2</sub> and using <b>2a</b> to react with <b>1a</b> and <b>5a</b> ..... | S15 |
| 3.3 Competetive reactions.....                                                                                                                                                     | S17 |
| 3.4 Reaction of <b>2a</b> with silylalkene <b>5b</b> .....                                                                                                                         | S16 |
| 3.5 Reaction of silylalkene <b>5a</b> with <b>1a</b> .....                                                                                                                         | S16 |
| 3.6 Radical clock experiments.....                                                                                                                                                 | S16 |
| 3.7 Light-dark experiments.....                                                                                                                                                    | S19 |
| 3.8 MS analysis of the reaction of <b>5c</b> with <b>1g</b> .....                                                                                                                  | S20 |
| 4. (Fluoro)alkylation of Alkenes <b>5</b> with (Fluoro)alkylhalides <b>1</b> Promoted by Photolysis of Alkylzirconocenes .....                                                     | S21 |
| 5. Characterization Data for Compounds <b>3</b> , <b>8-10</b> .....                                                                                                                | S23 |
| 6. Transformations of Compounds <b>3</b> .....                                                                                                                                     | S43 |
| 7. References.....                                                                                                                                                                 | S47 |
| 8. Copies of <sup>1</sup> H NMR, <sup>19</sup> F NMR and <sup>13</sup> C NMR Spectra of Compounds <b>3</b> , <b>5</b> , <b>8-15</b> .....                                          | S50 |

## 1. General Information and Materials

**General Information:**  $^1\text{H}$  NMR,  $^{19}\text{F}$  NMR and  $^{13}\text{C}$  NMR spectra were recorded on the Agilent MR 400, Bruker MR 500 and Bruker MR 600 spectrometer, and are calibrated using residual undeuterated solvent ( $\text{CHCl}_3$  at 7.26 ppm  $^1\text{H}$  NMR; 77.0 ppm  $^{13}\text{C}$  NMR;  $\text{CFCl}_3$  as an external standard and low field is positive). Chemical shifts ( $\delta$ ) are reported in ppm and coupling constants ( $J$ ) are in Hertz (Hz). The following abbreviations were used to explain the multiplicities: s = singlet, d = doublet, t = triplet, q = quartet, m = multiplet, br = broad. NMR yield was determined by  $^{19}\text{F}$  NMR using fluorobenzene as an internal standard before working up the reaction. High Resolution Mass spectral data were recorded on Agilent Technologies 7250 GCQTOF spectrometer in EI mode, or on Agilent Technologies 6224 TOF LC MS spectrometer in ESI mode. IR spectra were recorded on a Bruker TENSOR 27 FTIR Spectrometer equipped with a Platinum ATR detector.

**Materials:** All reagents were used as received from commercial sources or prepared as described in the literature. The 12 W blue LED strips (GreeThink 12V-5050-60; 1 m×12.5 mm×4.4 mm) was purchased from *Taobao.com*. Compounds **1b-1f**<sup>1</sup>, **1g**<sup>2</sup>, **1j**<sup>1</sup>, **1l**<sup>3</sup>, **1m**<sup>4</sup>, **1n**<sup>5</sup>, **1o**<sup>6</sup> were known compounds. **1p-1u** are commercially available. Compounds **1a**<sup>1</sup>, **1h**<sup>7</sup>, **1i**<sup>8</sup>, **1k**<sup>9</sup> were prepared according to the literature.

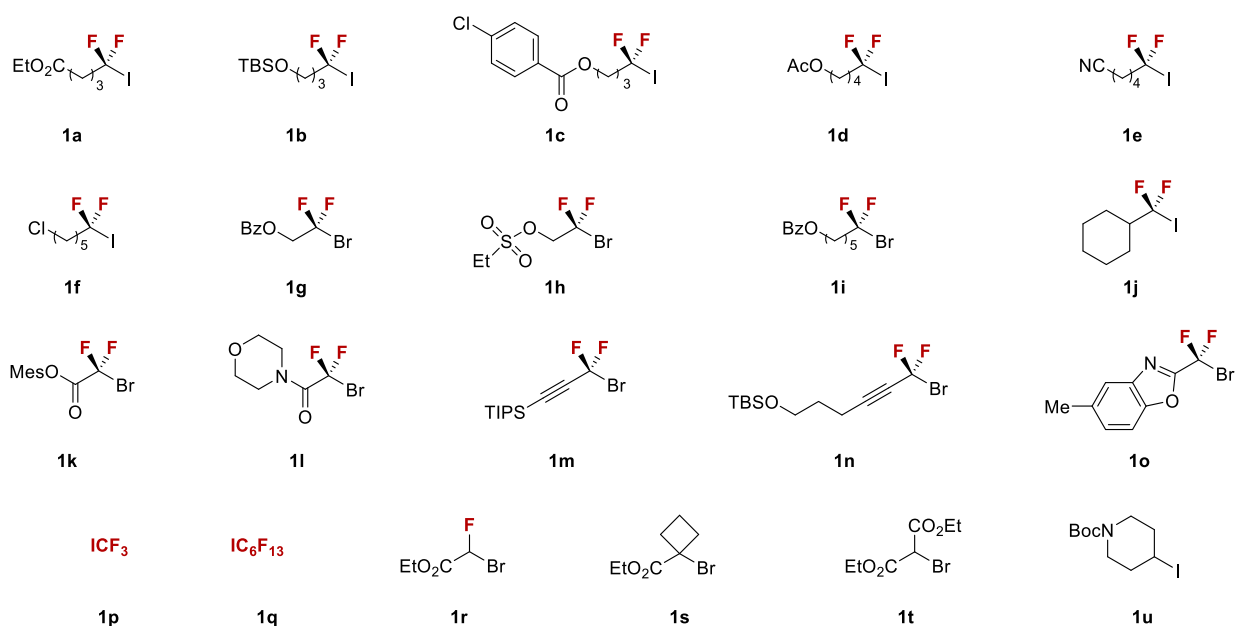

Structures of Difluoroalkyl Iodides and Bromides 1

### Preparation of compound 1a<sup>1</sup>.

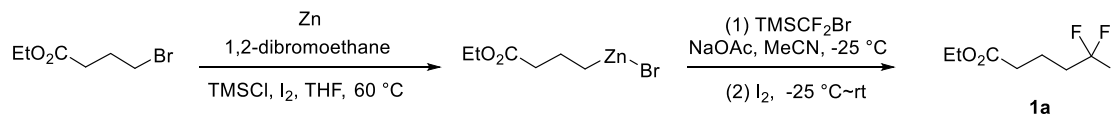

**Ethyl 5,5-difluoro-5-iodopentanoate (1a):** To a 250 mL round bottle equipped with a Teflon-coated magnetic stir bar were added zinc dust (75 mmol, 1.5 equiv), THF (50 mL), and one drop of 1,2-dibromoethane. The mixture was stirred at 80 °C and two drops of TMSCl were added. The resulting mixture was then stirred for 15 minutes at 80 °C. Alkyl bromide (50 mmol, 1.0 equiv) was slowly added. After the resulting mixture was stirred at 80 °C for 18 h, the unreacted zinc was allowed to settle down. The concentration of organozinc reagent was determined by iodometric titration. A freshly titrated THF solution of organozinc reagent (40 mmol, 1.0 equiv) was concentrated under vacuum until the solid or viscous residue was formed. To the resulting residue were added anhydrous MeCN (40 mL) and NaOAc (48 mmol, 1.2 equiv) at room temperature, the reaction flask was cooled to -25 °C, and the mixture was stirred for 10 minutes at -25 °C. Then, TMSCF<sub>2</sub>Br (48 mmol, 1.2 equiv) was added dropwise at -25 °C, and the reaction mixture was stirred at this temperature for 18 h. Iodine (42 mmol, 1.05 equiv) was added at -25 °C to the reaction mixture. After dissolution of iodine, the cooling bath was removed, the mixture was allowed to warm to room temperature and was stirred for additional 5 hours. The resulting reddish-brown mixture was quenched by addition of aqueous of Na<sub>2</sub>S<sub>2</sub>O<sub>3</sub> until decoloration, diluted with water, and extracted with PE. The combined organic layers were dried over Na<sub>2</sub>SO<sub>4</sub>, filtered and concentrated. The product (9.5 g, 65% yield) was purified by flash column chromatography on silica gel (Petroleum ether: Ethyl acetate = 100:1) as a yellow oil. <sup>1</sup>H NMR (500 MHz, CDCl<sub>3</sub>) δ 4.11 (q, *J* = 7.1 Hz, 2H), 2.42 – 2.29 (m, 4H), 1.92 – 1.80 (m, 2H), 1.23 (t, *J* = 7.1 Hz, 3H). <sup>19</sup>F NMR (376 MHz, CDCl<sub>3</sub>) δ -36.1 (t, *J* = 14.9 Hz, 2F). <sup>13</sup>C NMR (126 MHz, CDCl<sub>3</sub>) δ 172.3, 101.4 (t, *J* = 313.6 Hz), 60.5, 47.1 (t, *J* = 19.7 Hz), 32.3, 20.5 (t, *J* = 3.5 Hz), 14.1. IR (thin film) ν<sub>max</sub> 2982, 1736, 1450 cm<sup>-1</sup>. MS (EI) *m/z* (%) 165 (M-I)<sup>+</sup>, 137 (100), 117, 77. HRMS (FI) calculated for C<sub>7</sub>H<sub>11</sub>O<sub>2</sub>F<sub>2</sub>: 165.0722; Found: 165.0723 (M-I)<sup>+</sup>.



### Preparation of compound 1h<sup>7</sup>.

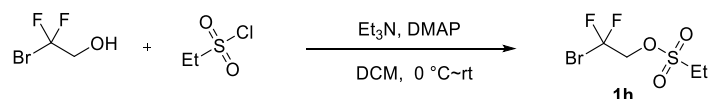

**2-Bromo-2,2-difluoroethyl ethanesulfonate (1h):** To a 100 mL round bottle equipped with a Teflon-coated magnetic stir bar were added 2-bromo-2,2-difluoroethan-1-ol (10 mmol, 1.0 equiv), CH<sub>2</sub>Cl<sub>2</sub> (50 mL), Et<sub>3</sub>N (20 mmol, 2.0 equiv), and DMAP (1.0 mmol, 10 mol%). Ethanesulfonyl chloride (15 mmol, 1.5 equiv) was then added at 0 °C. The resulting mixture was stirred at room temperature overnight until the starting material was totally consumed. After the reaction was completed, the reaction mixture was washed with brine and extracted with EA. The combined organic layers were dried over Na<sub>2</sub>SO<sub>4</sub>, filtered and concentrated. The product (1.9 g, 75% yield) was purified by flash column chromatography on silica gel (Petroleum ether: Ethyl acetate = 30:1) as a yellow oil. <sup>1</sup>H NMR (400 MHz, CDCl<sub>3</sub>) δ 4.63 (t, *J* = 11.6 Hz, 2H), 3.26 (q, *J* = 7.4 Hz, 2H), 1.47 (t, *J* = 7.4 Hz, 3H). <sup>19</sup>F NMR (376 MHz, CDCl<sub>3</sub>) δ -57.8 (t, *J* = 11.6 Hz). <sup>13</sup>C NMR (126 MHz, CDCl<sub>3</sub>) δ 116.7 (t, *J* = 306.9 Hz), 70.0 (t, *J* = 27.7 Hz), 46.1, 8.0. IR (thin film) ν<sub>max</sub> 2987, 2951, 2888, 1458 cm<sup>-1</sup>. MS (EI) *m/z* (%) 173 (M-Br)<sup>+</sup>, 145 (100), 123, 97. HRMS (FI) calculated for C<sub>4</sub>H<sub>7</sub>O<sub>3</sub>F<sub>2</sub>S: 173.0078; Found: 173.0081 (M-Br)<sup>+</sup>.

### Preparation of compound 1i<sup>8</sup>.

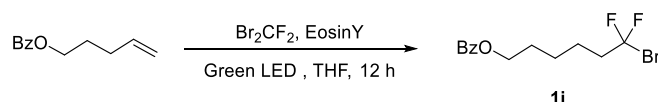

**6-Bromo-6,6-difluorohexyl benzoate (1i):** To a 500 mL of Schlenk tube was added EosinY (2.5 mmol, 5 mol%) in the air. The tube was then evacuated and backfilled with Ar (3 times). Alkene (1.0 equiv, 50 mmol) and anhydrous THF (250 mL) were added under Ar. The resulting mixture was degassed three times by the freeze–pump–thaw procedure. The CF<sub>2</sub>Br<sub>2</sub> (6.0 equiv, 300 mmol) was then added to the mixture via a syringe under Ar. The reaction mixture was stirred under irradiation of green LEDs strip for 12 h. The reaction mixture was then cooled to room temperature, filtered and concentrated. The product (8.0 g, 50% yield) was purified by flash column chromatography on silica gel (Petroleum ether: Ethyl acetate = 100:1) as a colorless oil. <sup>1</sup>H NMR (500 MHz, CDCl<sub>3</sub>) δ 8.04 (d,

$J = 7.7$  Hz, 2H), 7.56 (t,  $J = 7.4$  Hz, 1H), 7.45 (t,  $J = 7.7$  Hz, 2H), 4.34 (t,  $J = 6.5$  Hz, 2H), 2.42 – 2.31 (m, 2H), 1.85 – 1.77 (m, 2H), 1.74 – 1.67 (m, 2H), 1.58 – 1.51 (m, 2H).  $^{19}\text{F}$  NMR (376 MHz,  $\text{CDCl}_3$ )  $\delta$  -43.5 (t,  $J = 13.7$  Hz, 2F).  $^{13}\text{C}$  NMR (126 MHz,  $\text{CDCl}_3$ )  $\delta$  166.6, 132.9, 130.2, 129.5, 128.3, 122.9 (t,  $J = 305.8$  Hz), 64.5, 44.1 (t,  $J = 21.4$  Hz), 28.4, 25.0, 23.7. IR (thin film)  $\nu_{\text{max}}$  2949, 1719, 1451  $\text{cm}^{-1}$ . MS (EI)  $m/z$  (%) 320 ( $\text{M}^+$ ), 123 (100), 105, 77. HRMS (FI) calculated for  $\text{C}_{13}\text{H}_{15}\text{O}_2\text{F}_2\text{Br}$ : 320.0218; Found: 320.0223 ( $\text{M}^+$ ).

### Preparation of compound **1k**.

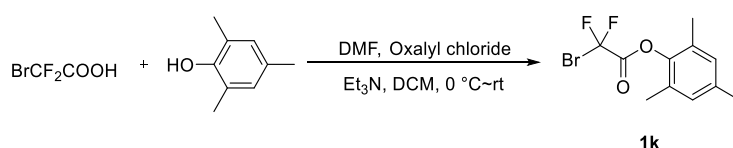

**Mesityl 2-bromo-2,2-difluoroacetate (1k):** To a 250 mL of round bottle was added  $\text{BrCF}_2\text{CO}_2\text{H}$  (36 mmol, 1.2 equiv) and then evacuated and backfilled with Ar (3 times). Anhydrous DCM (50 mL) and DMF (5 mol%, 1.5 mmol) were added under Ar. Oxalyl chloride (1.1 equiv, 33 mmol) was then added to the mixture via a syringe under Ar at 0 °C. After 5 min, the mixture was allowed to warm to rt. After 2 h, the reaction mixture was cooled to 0 °C, and a solution of 2,4,6-trimethylphenol (1.0 equiv, 30 mmol) and  $\text{Et}_3\text{N}$  (2.0 equiv, 60 mmol) in DCM (25 mL) was added. The mixture was stirred for 3 h and then quenched with water, and the aqueous layer was extracted with DCM. The combined organic layers were washed with brine, dried over  $\text{Na}_2\text{SO}_4$ , and filtered. The product (7.8 g, 90% yield) was purified by flash column chromatography on silica gel (Petroleum ether: Ethyl acetate = 100:1) as a colorless oil.  $^1\text{H}$  NMR (400 MHz,  $\text{CDCl}_3$ )  $\delta$  6.93 (s, 2H), 2.32 (s, 3H), 2.20 (s, 6H).  $^{19}\text{F}$  NMR (376 MHz,  $\text{CDCl}_3$ )  $\delta$  -60.4 (s, 2F).  $^{13}\text{C}$  NMR (126 MHz,  $\text{CDCl}_3$ )  $\delta$  157.5 (t,  $J = 31.9$  Hz), 144.6, 136.7, 129.6, 129.2, 108.4 (t,  $J = 314.5$  Hz), 20.7, 15.8. IR (thin film)  $\nu_{\text{max}}$  2925, 2864, 1789, 1483  $\text{cm}^{-1}$ . MS (EI)  $m/z$  (%) 292 ( $\text{M}^+$ ), 213, 135 (100), 119, 91. HRMS (FI) calculated for  $\text{C}_{11}\text{H}_{11}\text{O}_2\text{F}_2\text{Br}$ : 291.9905; Found: 291.9911 ( $\text{M}^+$ ).

Alkenes **5a-5k** are commercially available. Alkenes **5l**<sup>10</sup>, **5m**<sup>11</sup>, **5n**<sup>12</sup>, **5o**<sup>13</sup>, and **5q**<sup>11</sup> were prepared according to the literature. **5p**<sup>14</sup>, **5r**<sup>14</sup>, and **5s**<sup>14</sup> were prepared according to the literature.

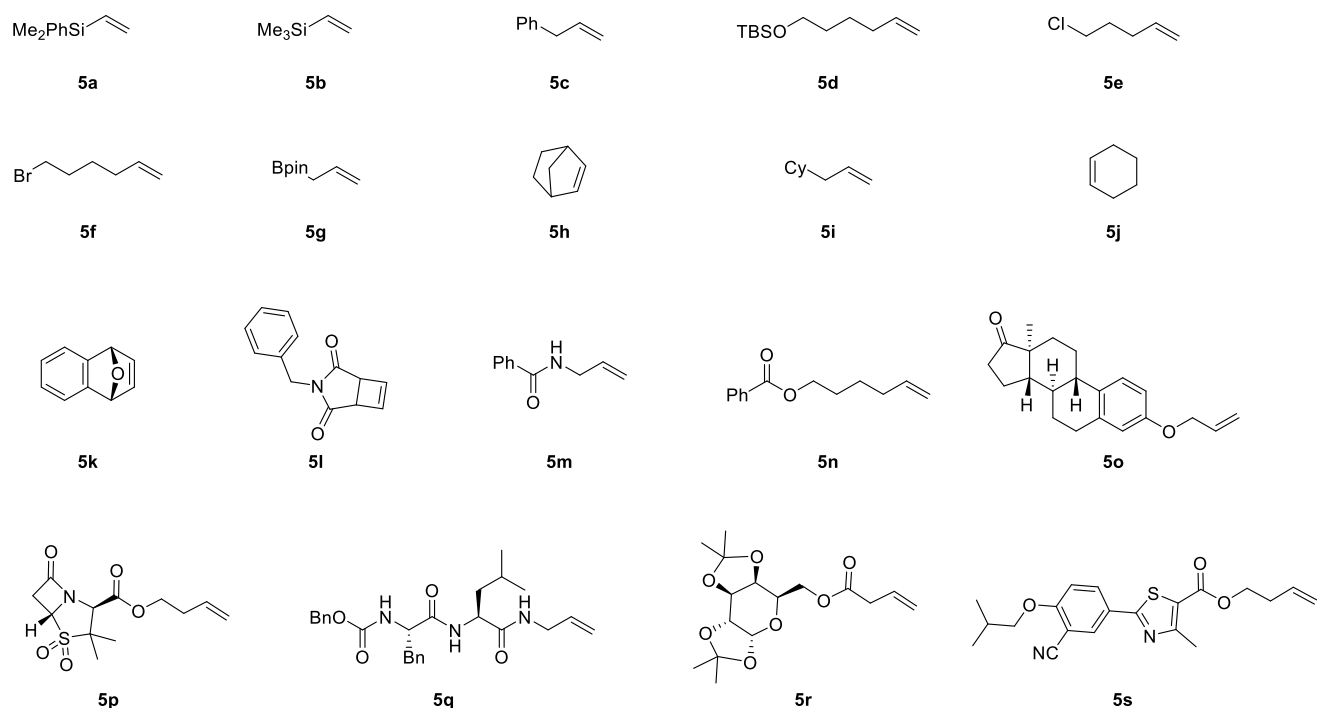

### Structures of Alkenes 5

#### Preparation of compounds 5p, 5r, and 5s.

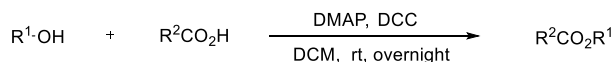

**General Procedure:** To a 250 mL round bottle equipped with a Teflon-coated magnetic stir bar were added alcohol (15 mmol, 1.0 equiv), DCM (50 mL), DMAP (0.183 g, 1.5 mmol, 10 mol%) and carboxylic acid (22.5 mmol, 1.5 equiv). DCC (6.18 g, 30 mmol, 2.0 equiv) was then added. The resulting mixture was stirred at room temperature overnight until the starting material was totally consumed. After the reaction was completed, the reaction mixture was washed with brine, dried over  $\text{Na}_2\text{SO}_4$ , filtered and concentrated. The alkene was purified with silica gel chromatography.

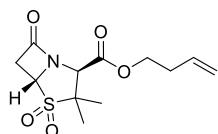

**But-3-en-1-yl (2S,5R)-3,3-dimethyl-7-oxo-4-thia-1-azabicyclo[3.2.0]heptane-2-carboxylate (5p).** The product (3.7 g, 87% yield) was purified by flash column chromatography on silica gel (Petroleum ether: Ethyl acetate = 8:1) as a yellow oil.

$^1\text{H}$  NMR (400 MHz,  $\text{CDCl}_3$ )  $\delta$  5.80 – 5.67 (m, 1H), 5.16 – 5.07 (m, 2H), 4.63 – 4.57 (m, 1H), 4.34 (s, 1H), 4.32 – 4.18 (m, 2H), 3.51 – 3.36 (m, 2H), 2.46 – 2.39 (m, 2H), 1.57 (s, 3H), 1.38 (s, 3H).  $^{13}\text{C}$  NMR (126 MHz,  $\text{CDCl}_3$ )  $\delta$  170.7, 166.8, 133.2, 118.0, 65.2, 63.1, 62.6, 61.0, 38.2, 32.7, 20.2, 18.3.

IR (thin film)  $\nu_{\max}$  2981, 2937, 1797, 1754  $\text{cm}^{-1}$ . MS (FI)  $m/z$  (%) 288 ( $\text{M}+\text{H}$ )<sup>+</sup>. HRMS (FI) calculated for  $\text{C}_{12}\text{H}_{18}\text{O}_5\text{NS}$ : 288.0900; Found: 288.0896 ( $\text{M}+\text{H}$ )<sup>+</sup>.

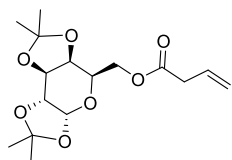

**((3aR,5R,5aS,8aS,8bR)-2,2,7,7-Tetramethyltetrahydro-5H-bis([1,3]dioxolo)[4,5-b:4',5'-d]pyran-5-yl)methyl but-3-enoate (5r).** The product (4.3 g, 86% yield) was purified by flash column chromatography on

silica gel (Petroleum ether: Ethyl acetate = 10:1) as a yellow solid (m.p. 88 – 90 °C). <sup>1</sup>H NMR (500 MHz,  $\text{CDCl}_3$ )  $\delta$  5.97 – 5.86 (m, 1H), 5.54 (d,  $J$  = 5.0 Hz, 1H), 5.18 (dd,  $J$  = 7.7, 1.4 Hz, 1H), 5.15 (s, 1H), 4.62 (dd,  $J$  = 7.9, 2.5 Hz, 1H), 4.35 – 4.29 (m, 2H), 4.26 – 4.16 (m, 2H), 4.05 – 3.99 (m, 1H), 3.13 (d,  $J$  = 7.0 Hz, 2H), 1.50 (s, 3H), 1.45 (s, 3H), 1.334 (s, 3H), 1.328 (s, 3H). <sup>13</sup>C NMR (126 MHz,  $\text{CDCl}_3$ )  $\delta$  171.5, 130.1, 118.6, 109.6, 108.8, 96.3, 71.0, 70.7, 70.4, 66.0, 63.6, 38.9, 26.0, 25.9, 24.9, 24.5. IR (thin film)  $\nu_{\max}$  3078, 1735  $\text{cm}^{-1}$ . MS (DART)  $m/z$  (%) 329 ( $\text{M}+\text{H}$ )<sup>+</sup>. HRMS (DART) calculated for  $\text{C}_{16}\text{H}_{25}\text{O}_7$ : 329.1595; Found: 329.1593 ( $\text{M}+\text{H}$ )<sup>+</sup>.

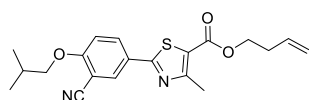

**But-3-en-1-yl 2-(3-cyano-4-isobutoxyphenyl)-4-methylthiazole-5-carboxylate (5s).** The product (5.0 g, 90% yield) was purified by flash

column chromatography on silica gel (Petroleum ether: Ethyl acetate = 5:1) as a white solid (m.p. 98 – 100 °C). <sup>1</sup>H NMR (400 MHz,  $\text{CDCl}_3$ )  $\delta$  8.13 (t,  $J$  = 2.2 Hz, 1H), 8.05 (dt,  $J$  = 8.8, 2.2 Hz, 1H), 6.98 (d,  $J$  = 8.9 Hz, 1H), 5.89 – 5.75 (m, 1H), 5.20 – 5.08 (m, 2H), 4.33 (t,  $J$  = 6.6 Hz, 2H), 3.88 (d,  $J$  = 6.4 Hz, 2H), 2.73 (s, 3H), 2.52 – 2.44 (m, 2H), 2.25 – 2.10 (m, 1H), 1.08 (s, 3H), 1.06 (s, 3H). <sup>13</sup>C NMR (126 MHz,  $\text{CDCl}_3$ )  $\delta$  167.1, 162.4, 161.7, 161.1, 133.6, 132.4, 131.9, 125.9, 121.7, 117.6, 115.3, 112.5, 102.8, 75.6, 64.2, 33.0, 28.1, 19.0, 17.4. IR (thin film)  $\nu_{\max}$  3077, 2975, 2232, 1689  $\text{cm}^{-1}$ . MS (FI)  $m/z$  (%) 370 ( $\text{M}$ )<sup>+</sup>, 355, 314, 260 (100), 243. HRMS (FI) calculated for  $\text{C}_{20}\text{H}_{22}\text{O}_3\text{N}_2\text{S}$ : 370.1346; Found: 370.1348 ( $\text{M}$ )<sup>+</sup>.

**Table S1. Preparation of alkylzirconocene 2a by reaction of 5a with 6.<sup>a</sup>**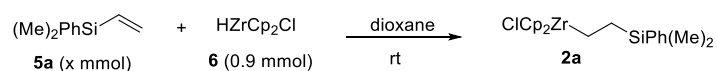

| entry | 6:5a  | Conv 5a (%) <sup>b</sup> |
|-------|-------|--------------------------|
| 1     | 1:1.2 | 68.2%                    |
| 2     | 1:1.1 | 70.5%                    |
| 3     | 1:1.0 | 75.3%                    |
| 4     | 1:0.9 | 74.4%                    |
| 5     | 1:0.8 | 91.4%                    |
| 6     | 1:0.7 | 98.4%                    |
| 7     | 1:0.6 | 99.5%                    |

<sup>a</sup>Reaction conditions (unless otherwise specified): **6** (0.9 mmol), dioxane (1 mL), 1 h. <sup>b</sup>Determined by GC-MS using established standard curve.

**Procedure:** To a 25 mL of Schlenk tube was added ZrCp<sub>2</sub>HCl (0.9 mmol) in the glovebox. The tube was taken out of the glovebox, and was then evacuated and backfilled with Ar (3 times). **5a** (x mmol) and anhydrous dioxane (1.0 mL) were added under Ar. The reaction mixture was stirred for about 1 h at room temperature. The reaction was quenched with H<sub>2</sub>O. The conversion of **5a** was determined by GC-MS using established standard curve.

## 2. Optimization of the Reaction Conditions

**Table S2. Optimization of the reaction conditions<sup>a</sup>**

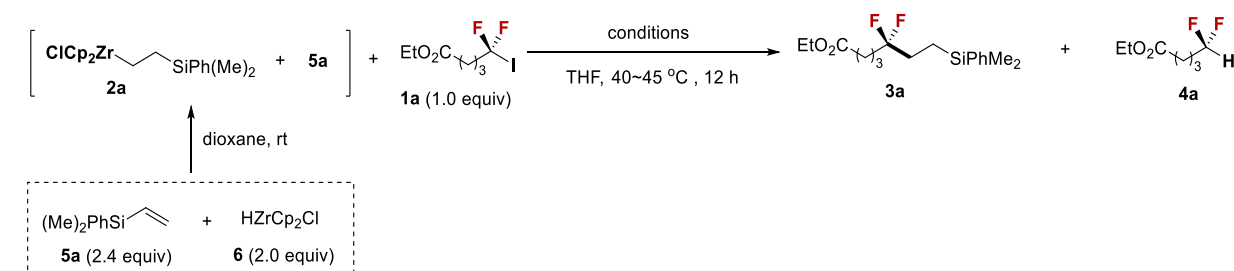

| entry    | NiBr·DME (10 mol%) | Bpy (10 mol%) | Blue LED | <b>3a</b> (%) <sup>b</sup> | <b>4a</b> (%) <sup>b</sup> |
|----------|--------------------|---------------|----------|----------------------------|----------------------------|
| 1        | +                  | +             | -        | 0                          | 5                          |
| 2        | +                  | +             | +        | 51                         | 27                         |
| <b>3</b> | -                  | -             | +        | <b>53</b>                  | <b>33</b>                  |

<sup>a</sup>Reaction conditions (unless otherwise specified): **1a** (0.3 mmol, 1.0 equiv), **5a** (2.4 equiv), **6** (2.0 equiv), THF (2.0 mL), 40~45 °C, Blue LED (12 W), 12 h. The yield was determined by <sup>19</sup>F NMR using fluorobenzene as an internal standard. <sup>b</sup>The yield of **3a** was calculated based on **1a**.

**Table S3. Screening of the solvent<sup>a</sup>**

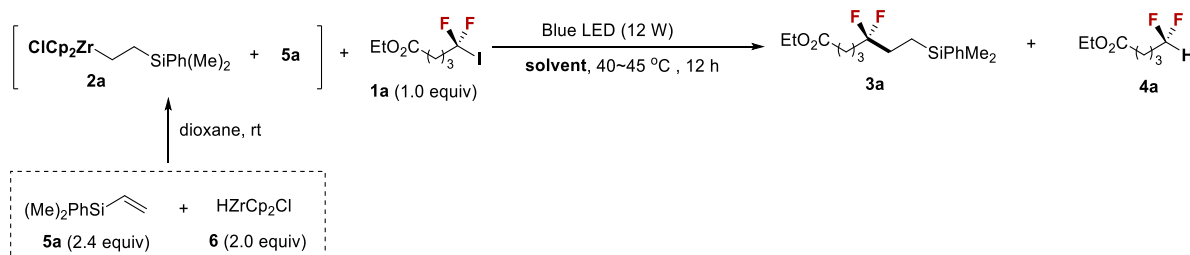

| entry    | solvent            | <b>3a</b> (%) <sup>b</sup> | <b>4a</b> (%) <sup>b</sup> |
|----------|--------------------|----------------------------|----------------------------|
| 1        | CH <sub>3</sub> CN | 37                         | 17                         |
| 2        | DCM                | 29                         | 19                         |
| 3        | DMF                | 31                         | 16                         |
| 4        | Dioxane            | 36                         | 23                         |
| 5        | THF                | 53                         | 33                         |
| <b>6</b> | <b>NMP</b>         | <b>59</b>                  | <b>34</b>                  |
| 7        | DME                | 42                         | 25                         |

<sup>a</sup>Reaction conditions (unless otherwise specified): **1a** (0.3 mmol, 1.0 equiv), **5a** (2.4 equiv), **6** (2.0 equiv), solvent (2.0 mL), 40~45 °C, Blue LED (12 W), 12 h. The yield was determined by <sup>19</sup>F NMR using fluorobenzene as an internal standard. <sup>b</sup>The yield of **3a** was calculated based on **1a**.

**Table S4. Screening of the loading amount of NMP<sup>a</sup>**

| entry    | NMP (x mL) | <b>3a (%)<sup>b</sup></b> | <b>4a (%)<sup>b</sup></b> |
|----------|------------|---------------------------|---------------------------|
| 1        | 1.0        | 51                        | 30                        |
| 2        | 2.0        | 59                        | 34                        |
| <b>3</b> | <b>3.0</b> | <b>64</b>                 | <b>31</b>                 |
| 5        | 4.0        | 60                        | 35                        |

<sup>a</sup>Reaction conditions (unless otherwise specified): **1a** (0.3 mmol, 1.0 equiv), **5a** (2.4 equiv), **6** (2.0 equiv), NMP (x mL), 40~45 °C, Blue LED (12 W), 12 h. The yield was determined by <sup>19</sup>F NMR using fluorobenzene as an internal standard. <sup>b</sup>The yield of **3a** was calculated based on **1a**.

**Table S5. Screening of the loading amount of 5a and 6<sup>a</sup>**

| entry          | <b>5a (y equiv)</b> | <b>6 (z equiv)</b> | <b>3a (%)<sup>b</sup></b> | <b>4a (%)<sup>b</sup></b> |
|----------------|---------------------|--------------------|---------------------------|---------------------------|
| 1 <sup>d</sup> | 1.8                 | 1.5                | 52                        | 38                        |
| 2              | 2.4                 | 2.0                | 64                        | 31                        |
| 3              | 3.0                 | 2.5                | 73                        | 21                        |
| <b>4</b>       | <b>3.6</b>          | <b>3.0</b>         | <b>81 (62)</b>            | <b>15</b>                 |
| 6              | 4.2                 | 3.5                | 82                        | 11                        |

<sup>a</sup>Reaction conditions (unless otherwise specified): **1a** (0.3 mmol, 1.0 equiv), **5a** (y equiv), **6** (z equiv), NMP (3.0 mL), 40~45 °C, Blue LED (12 W), 12 h. The yield was determined by <sup>19</sup>F NMR using fluorobenzene as an internal standard. <sup>b</sup>The yield of **3a** was calculated based on **1a**, the number given in parentheses is the isolated yield.

**Table S6. Screening of the reaction temperature<sup>a</sup>**

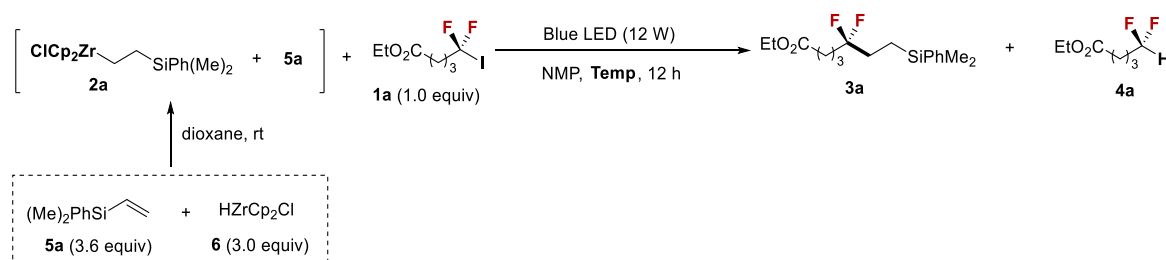

| entry | Temp (°C)    | <b>3a</b> (%) <sup>b</sup> | <b>4a</b> (%) <sup>b</sup> |
|-------|--------------|----------------------------|----------------------------|
| 1     | 25           | 78                         | 18                         |
| 2     | <b>40~45</b> | <b>81</b>                  | <b>15</b>                  |
| 3     | 55           | 72                         | 23                         |

<sup>a</sup>Reaction conditions (unless otherwise specified): **1a** (0.3 mmol, 1.0 equiv), **5a** (3.6 equiv), **6** (3.0 equiv), NMP (3.0 mL), Blue LED (12 W), 12 h. The yield was determined by <sup>19</sup>F NMR using fluorobenzene as an internal standard. <sup>b</sup>The yield of **3a** was calculated based on **1a**.

**Table S7. Screening of the lighting sources<sup>a</sup>**

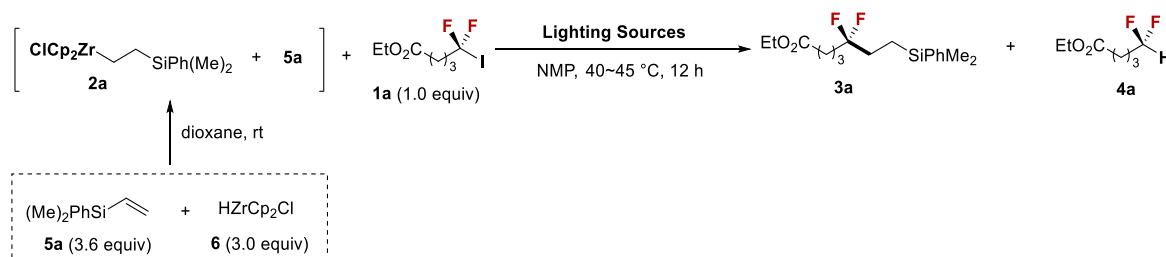

| entry    | lighting sources | <b>3a</b> (%) <sup>b</sup> | <b>4a</b> (%) <sup>b</sup> |
|----------|------------------|----------------------------|----------------------------|
| <b>1</b> | <b>Blue LED</b>  | <b>81</b>                  | <b>15</b>                  |
| 2        | Green LED        | 79                         | 15                         |
| 3        | White LED        | 78                         | 17                         |

<sup>a</sup>Reaction conditions (unless otherwise specified): **1a** (0.3 mmol, 1.0 equiv), **5a** (3.6 equiv), **6** (3.0 equiv), NMP (3 mL), 12 h. The yield was determined by <sup>19</sup>F NMR using fluorobenzene as an internal standard. <sup>b</sup>The yield of **3a** was calculated based on **1a**.



## Re-optimized the reaction conditions

**Table S8. Screening of the loading amount of 5a and 6 for the reaction with 1a<sup>a</sup>**

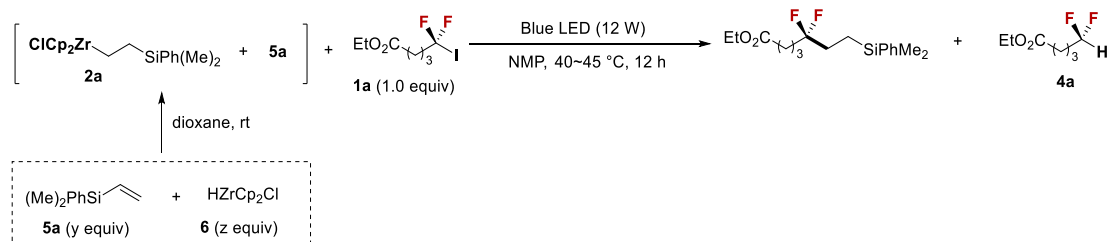

| entry     | <b>5a</b> (y equiv) | <b>6</b> (z equiv) | <b>3a</b> (%) <sup>b</sup> | <b>4a</b> (%) <sup>b</sup> |
|-----------|---------------------|--------------------|----------------------------|----------------------------|
| 1         | 2.0                 | 0.1                | 0                          | 0                          |
| 2         | 2.0                 | 0.2                | 0                          | 2                          |
| 3         | 2.0                 | 0.5                | 36                         | 16                         |
| 4         | 2.0                 | 0.75               | 54                         | 19                         |
| 5         | 2.0                 | 1.0                | 59                         | 19                         |
| 6         | 2.0                 | 1.1                | 68                         | 22                         |
| 7         | 2.0                 | 1.2                | 67                         | 24                         |
| 8         | 1.5                 | 1.2                | 56                         | 36                         |
| 9         | 2.2                 | 1.2                | 73                         | 19                         |
| <b>10</b> | <b>2.5</b>          | <b>1.2</b>         | <b>80 (62)</b>             | <b>14</b>                  |
| 11        | 3.0                 | 1.2                | 81                         | 12                         |

<sup>a</sup>Reaction conditions (unless otherwise specified): **1a** (0.3 mmol, 1.0 equiv), **5a** (y equiv), **6** (z equiv), NMP (3.0 mL), 40–45 °C, Blue LED (12 W), 12 h. The yield was determined by <sup>19</sup>F NMR using fluorobenzene as an internal standard. <sup>b</sup>The yield of **3a** was calculated based on **1a**, the number given in parentheses is the isolated yield.

**Table S9. Screening of the loading amount of 5a and 6 for the reaction with 1g<sup>a</sup>**

| entry    | 5a (y equiv) | 6 (z equiv) | 3i (%)         | 4i (%)    |
|----------|--------------|-------------|----------------|-----------|
| 1        | 2.5          | 1.5         | 42             | 35        |
| 2        | 2.5          | 1.8         | 45             | 46        |
| 3        | 2.5          | 2.0         | 47             | 48        |
| 4        | 3.0          | 1.8         | 54             | 19        |
| <b>5</b> | <b>3.5</b>   | <b>1.8</b>  | <b>69 (65)</b> | <b>19</b> |
| 6        | 4.0          | 1.8         | 68             | 22        |

<sup>a</sup>Reaction conditions (unless otherwise specified): **1g** (0.3 mmol, 1.0 equiv), **5a** (y equiv), **6** (z equiv), NMP (3.0 mL), 40~45 °C, Blue LED (12 W), 12 h. The yield was determined by <sup>19</sup>F NMR using fluorobenzene as an internal standard. <sup>b</sup>The yield of **3i** was calculated based on **1g**, the number given in parentheses is the isolated yield.

### 3. Mechanistic Studies

#### 3.1. Preparation of 2a from the reaction of Grignard reagent 7 with ZrCp<sub>2</sub>Cl<sub>2</sub> and using 2a to react with 1a

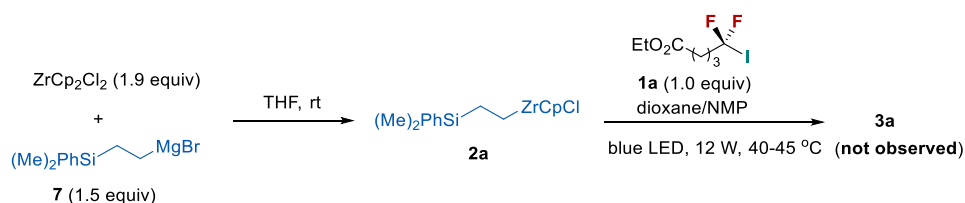

**Procedure:** To a 25 mL of Schlenk tube were added ZrCp<sub>2</sub>Cl<sub>2</sub> (0.57 mmol, 1.9 equiv, the loading amount of ZrCp<sub>2</sub>Cl<sub>2</sub> was based on **1a**) and **7**<sup>15</sup> (1.32 mL, 0.34 M, 1.5 equiv, the loading amount of **7** was based on **1a**) under Ar. The mixture was stirred for 3 h at room temperature to afford alkylzirconocene **2a**. (**Note:** When Grignard reagent **7** was prepared, ~10% of silylalkene **5a** was generated. Alkene **5a** can be trapped by addition of ZrCp<sub>2</sub>HCl **6** (0.06 mmol) to the resulting solution of **2a**. After the mixture was stirred for 1 h, only trace amount of **5a** was unreacted. This unreacted **5a**

would lead to  $\leq 1\%$  yield of **3a**, after the solution of **2a** was treated with **1a** under the irradiation of blue light.) To another 25 mL of Schlenk tube were added **1a** (0.3 mmol, 1.0 equiv.) and NMP (3.0 mL). The prepared alkylzirconocene **2a** was then transferred to the reaction mixture via syringe under Ar. The resulting reaction mixture was stirred at 40~45 °C for 12 h under irradiation of a 12 W blue LEDs strip. The reaction was cooled to room temperature, and  $^{19}\text{F}$  NMR analysis of the reaction showed that essentially, **3a** was not formed during the reaction.

### 3.2. Preparation of **2a** from the reaction of Grignard reagent **7** with $\text{ZrCp}_2\text{Cl}_2$ and using **2a** to react with **1a** and **5a**

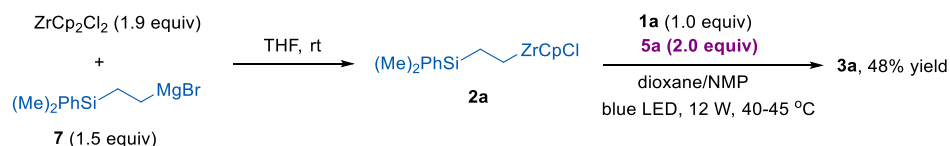

**Procedure:** To a 25 mL of Schlenk tube were added  $\text{ZrCp}_2\text{Cl}_2$  (0.57 mmol, 1.9 equiv, the loading amount of  $\text{ZrCp}_2\text{Cl}_2$  was based on **1a**) and **7** (1.32 mL, 0.34 M, 1.5 equiv, the loading amount of **7** was based on **1a**) under Ar. The mixture was stirred for 3 h at room temperature to afford alkylzirconocene **2a**. To another 25 mL of Schlenk tube were added **1a** (0.3 mmol, 1.0 equiv), **5a** (0.6 mmol, 2.0 equiv), and NMP (3.0 mL). The prepared alkylzirconocene **2a** was then transferred to the reaction mixture via syringe under Ar. The resulting reaction mixture was stirred at 40~45 °C for 12 h under irradiation of a 12 W blue LEDs strip. The reaction was cooled to room temperature, and  $^{19}\text{F}$  NMR analysis of the reaction showed 48% yield of **3a** was afforded.

### 3.3. Competitive reactions

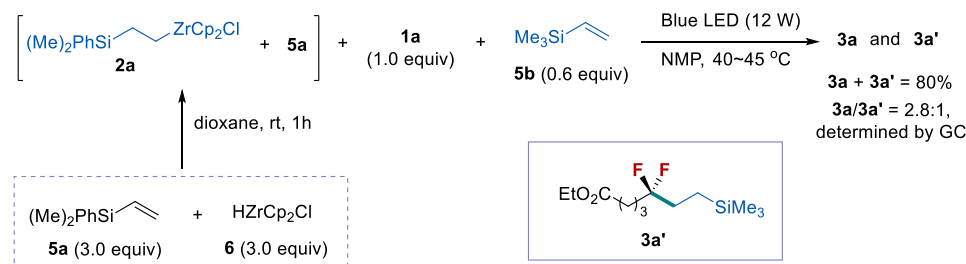

**Procedure:** To a 25 mL of Schlenk tube was added  $\text{ZrCp}_2\text{HCl}$  **6** (3.0 equiv, 0.9 mmol, the loading amount of **6** was based on **1a**) in the glovebox. The tube was then taken out of the glovebox, and was

evacuated and backfilled with Ar (3 times). Alkene **5a** (3.0 equiv, 0.9 mmol, the loading amount of **5a** was based on **1a**) and anhydrous dioxane (1.0 mL) were added under Ar. The resulting mixture was stirred at room temperature for 1 h until a clear yellow solution was obtained. To another 25 mL of Schlenk tube were added difluoroalkyl halide **1a** (0.3 mmol, 1.0 equiv), **5b** (0.18 mmol, 0.6 equiv) and NMP (3.0 mL) under Ar. The prepared solution of alkylzirconocene **2a** and alkene **5a** was then added to the mixture via syringe for 1 min under Ar. The resulting mixture was stirred at 40~45 °C under irradiation of a 12 W blue LEDs strip for 12 h. The reaction mixture was then cooled to room temperature. <sup>19</sup>F NMR analysis of the reaction showed that 80% yield of **3a** and **3a'** (**3a**/**3a'** = 2.8:1, determined by GC) were afforded.

### 3.4. Reaction of **2a** with silylalkene **5b**

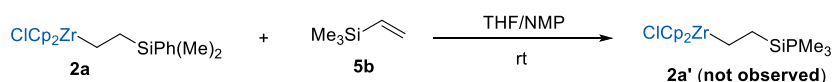

**Procedure:** To a 25 mL of Schlenk tube was added ZrCp<sub>2</sub>HCl **6** (5.0 equiv, 0.9 mmol) in the glovebox. The tube was then taken out of the glovebox, and was evacuated and backfilled with Ar (3 times). Alkene **5a** (5.0 equiv, 0.9 mmol) and anhydrous dioxane (1.0 mL) were added under Ar. The resulting mixture was stirred at room temperature for 1 h until a clear yellow solution was obtained. Then **5b** (0.18 mmol, 1.0 equiv) and NPM (3 mL) were added to the reaction mixture under Ar. The resulting mixture was stirred at room temperature for 1 h. GC-MS analysis of the reaction after the reaction was quenched with H<sub>2</sub>O.

### 3.5. Reaction of silylalkene **5a** with **1a**

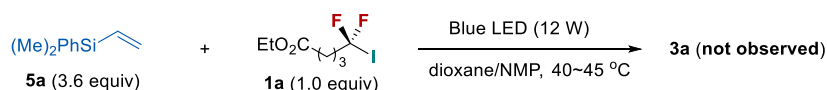

**Procedure:** To 25 mL of Schlenk tube were added **1a** (0.3 mmol, 1.0 equiv), **5a** (1.08 mmol, 3.6 equiv), dioxane (1.0 mL) and NMP (3.0 mL) under Ar. The resulting reaction mixture was stirred at 40~45 °C for 12 h under irradiation of a 12 W blue LEDs strip. The reaction was cooled to room temperature. <sup>19</sup>F NMR analysis of the reaction showed no **3a** was observed.

### 3.6 Radical clock experiments.

#### A. Reaction of **1g** with **2b** and **16**

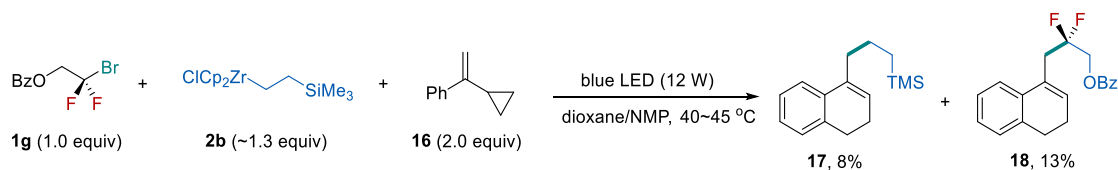

**Procedure:** To a 25 mL of Schlenk tube was added  $\text{ZrCp}_2\text{HCl}$  (1.8 equiv, 0.54 mmol) in the glovebox. The tube was then taken out of the glove box, and was evacuated and backfilled with Ar (3 times). Silylalkene **5b** (3.5 equiv, 1.05 mmol) and anhydrous dioxane (1.0 mL) were added under Ar. The reaction mixture was stirred for 1 h to provide **2b**. To another 25 mL of Schlenk tube were added **1g** (0.3 mmol, 1.0 equiv), **16** (0.6 mmol, 2.0 equiv) and NMP (3.0 mL). The prepared alkylzirconocene **2b** (~1.3 equiv., ~ 0.38 mmol) was transferred to the reaction via syringe for about 1 min under Ar. The reaction mixture was stirred 12 h at 40~45 °C under irradiation of a 12 W blue LEDs strip. The reaction mixture was then cooled to room temperature.  $^{19}\text{F}$  NMR analysis of the reaction showed 13% yield of **18** was provided. The yield of **17** (8% yield) was determined by  $^1\text{H}$  NMR using mesitylene as the internal standard.

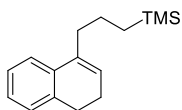

**3-(3,4-Dihydronaphthalen-1-yl)propyltrimethylsilane (17).** The product (8% yield determined by  $^1\text{H}$  NMR) was purified by flash column chromatography on silica gel (PE) as a colorless oil.  $^1\text{H}$  NMR (400 MHz,  $\text{CDCl}_3$ )  $\delta$  7.23 (d,  $J = 7.2$  Hz, 1H), 7.21 – 7.06 (m, 3H), 5.92 – 5.77 (m, 1H), 2.73 (t,  $J = 8.0$  Hz, 2H), 2.44 (t,  $J = 7.2$  Hz, 2H), 2.31 – 2.16 (m, 2H), 1.58 – 1.46 (m, 2H), 0.62 – 0.50 (m, 2H), -0.03 (s, 9H).  $^{13}\text{C}$  NMR (101 MHz,  $\text{CDCl}_3$ )  $\delta$  136.7, 136.5, 135.1, 127.5, 126.4, 126.2, 124.7, 122.6, 36.8, 28.5, 23.1, 23.1, 16.8, -1.6. IR (thin film)  $\nu_{\text{max}}$  2925  $\text{cm}^{-1}$ .

$^1$ . MS (EI)  $m/z$  (%) 244 ( $\text{M}^+$ ), 227, 170, 144 (100), 73. HRMS (FI) calculated for  $\text{C}_{16}\text{H}_{24}\text{Si}$ : 244.1642; Found: 244.1645 ( $\text{M}^+$ ).

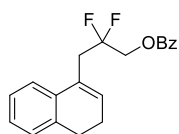

**3-(3,4-Dihydronaphthalen-1-yl)-2,2-difluoropropyl benzoate (18).** The product (13% determined by  $^{19}\text{F}$  NMR) was purified by flash column chromatography on silica gel (PE) as a colorless oil.  $^1\text{H}$  NMR (400 MHz,  $\text{CDCl}_3$ )  $\delta$  8.06 (d,  $J = 7.4$  Hz, 2H), 7.61 (t,  $J = 7.4$  Hz, 1H), 7.48 (t,  $J = 7.4$  Hz, 2H), 7.39 – 7.28 (m, 1H), 7.21 – 7.06 (m, 3H), 6.20 – 6.01 (m,

1H), 4.47 (t,  $J = 12.4$  Hz, 2H), 3.21 (t,  $J = 15.8$  Hz, 2H), 2.76 (t,  $J = 8.0$  Hz, 2H), 2.35 – 2.20 (m, 2H).  $^{19}\text{F}$  NMR (376 MHz,  $\text{CDCl}_3$ )  $\delta$  -101.7 – -102.0 (m, 2F).  $^{13}\text{C}$  NMR (126 MHz,  $\text{CDCl}_3$ )  $\delta$  165.4, 136.3, 134.0, 133.5, 131.7, 129.8, 129.2, 128.5, 127.7, 127.2, 126.3, 123.1, 121.1 (t,  $J = 244.3$  Hz), 63.6 (t,  $J = 33.1$  Hz), 37.1 (t,  $J = 24.7$  Hz), 28.1 (s), 23.2. IR (thin film)  $\nu_{\text{max}}$  2934, 2858, 1732, 1351  $\text{cm}^{-1}$ . MS (EI)  $m/z$  (%) 328 ( $\text{M}^+$ ), 222, 186, 141, 105 (100), 77. HRMS (FI) calculated for  $\text{C}_{20}\text{H}_{18}\text{F}_2\text{O}_2$ : 328.1269; Found: 328.1268 ( $\text{M}^+$ ).

## B. Reaction of **2b** with **16**

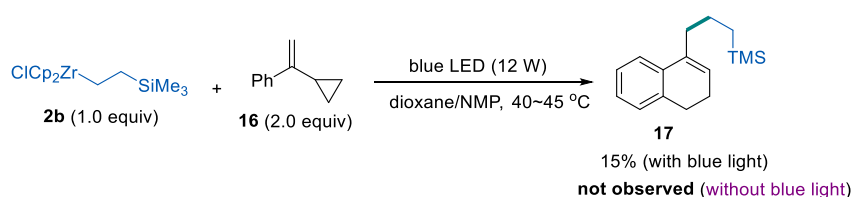

**Procedure:** To a 25 mL of Schlenk tube was added  $\text{ZrCp}_2\text{HCl}$  (0.54 mmol) in the glovebox. The tube was then taken out of the glove box, and was then evacuated and backfilled with Ar (3 times). Silylalkene **5b** (1.05 mmol) and anhydrous dioxane (1.0 mL) were added under Ar. The reaction mixture was stirred for 1 h to provide **2b** (~ 0.38 mmol, 1.0 equiv). To another 25 mL of Schlenk tube were added **16** (0.76 mmol, 2.0 equiv) and NMP (3.0 mL). The prepared alkylzirconocene **2b** was added to the mixture via syringe for about 1 min under Ar. The reaction mixture was stirred 12 h at 40~45  $^\circ\text{C}$  under irradiation of a 12 W blue LEDs strip. The reaction mixture was then cooled to room temperature. The yield of **17** (15% yield) was determined by  $^1\text{H}$  NMR using mesitylene as the internal standard. Under the reaction conditions, the product of **17** was not observed without blue light.

## C. Reaction of **1g** with **16**

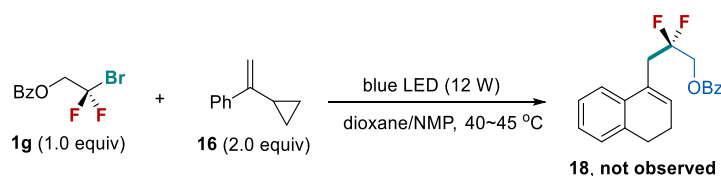

**Procedure:** To a 25 mL of Schlenk tube were added **1g** (0.3 mmol, 1.0 equiv), **16** (0.6 mmol, 2.0 equiv) and NMP (3.0 mL). The reaction mixture was stirred at 40~45  $^\circ\text{C}$  for 12 h under irradiation of a 12 W blue LEDs strip. The reaction mixture was then cooled to room temperature.  $^{19}\text{F}$  NMR analysis

of the reaction showed no **18** was observed.

### 3.7 Light-dark experiments

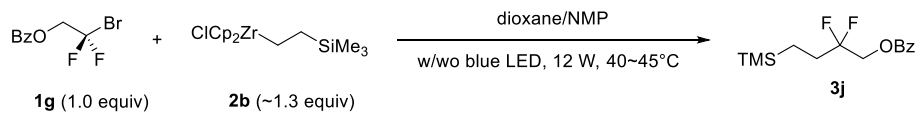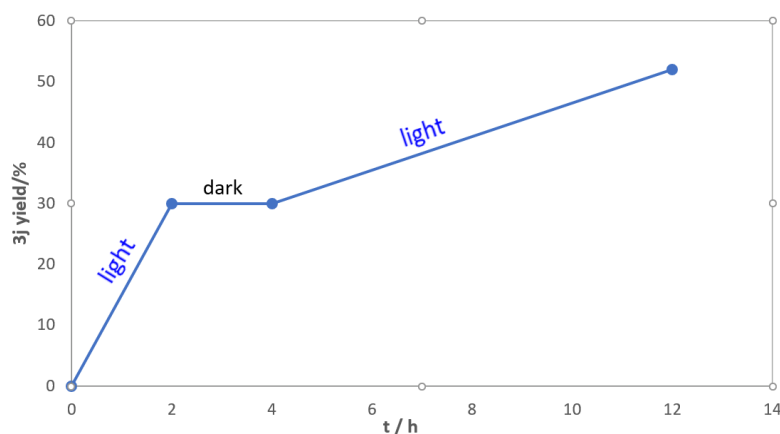

**Figure S1. Light -dark experiments for the reaction of **1g** with **2b****

**Procedure:** To a 25 mL of Schlenk tube was added  $\text{ZrCp}_2\text{HCl}$  (1.8 equiv, 0.54 mmol) in the glovebox. The tube was then taken out of the glovebox, and was evacuated and backfilled with Ar (3 times). Alkene **5b** (3.5 equiv, 1.05 mmol) and anhydrous dioxane (1.0 mL) were added by a syringe under Ar. The mixture was stirred for 1 h until a clear yellow solution was obtained. To another 25 mL of Schlenk tube were added **1g** (0.3 mmol, 1.0 equiv) and NMP (3.0 mL). The prepared solution of alkylzirconocene **2b** (~1.3 equiv, ~ 0.38 mmol) was added to the reaction mixture over 1 min via a syringe under Ar. The reaction mixture was stirred for 2h under irradiation of a 12 W blue LEDs strip at 40~45 °C. The yield was determined by  $^{19}\text{F}$  NMR. Then, the reaction was stirred in dark at 45 °C for 2 h. The yield was determined by  $^{19}\text{F}$  NMR. The reaction mixture was then stirred at the same reaction temperature for 8 h under irradiation of a 12 W blue LEDs strip. The yield was determined by  $^{19}\text{F}$  NMR.

### 3.8 MS analysis of the reaction of **5c** with **1g**

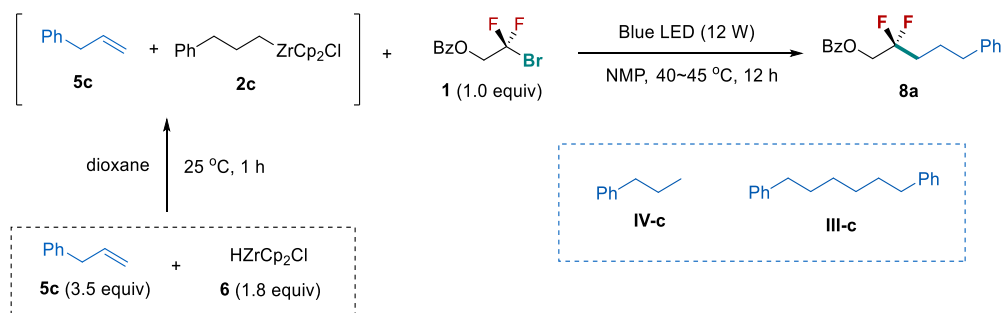

MS analysis of the reaction showed that homo-coupling of **III-c** and a large amount of **IV-c** were formed.

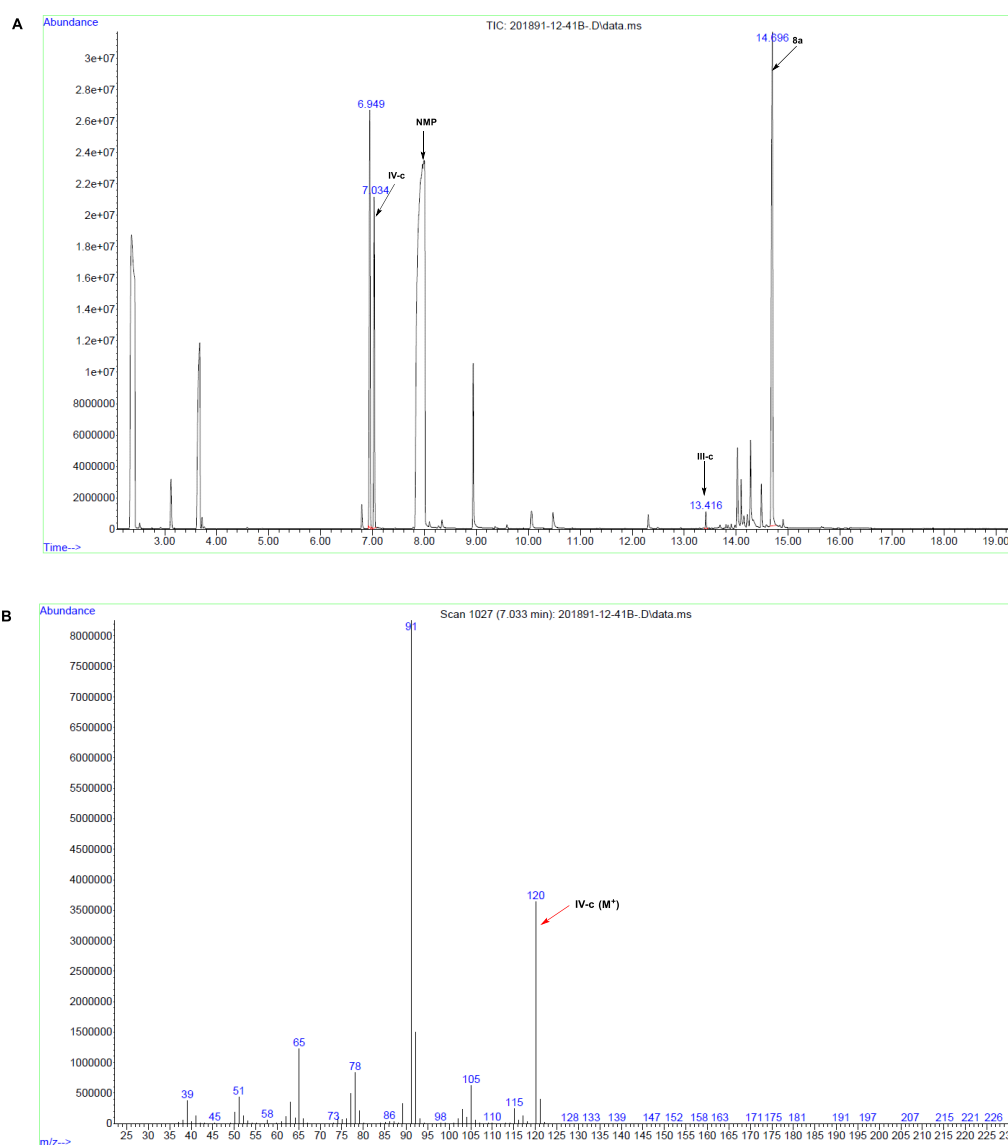



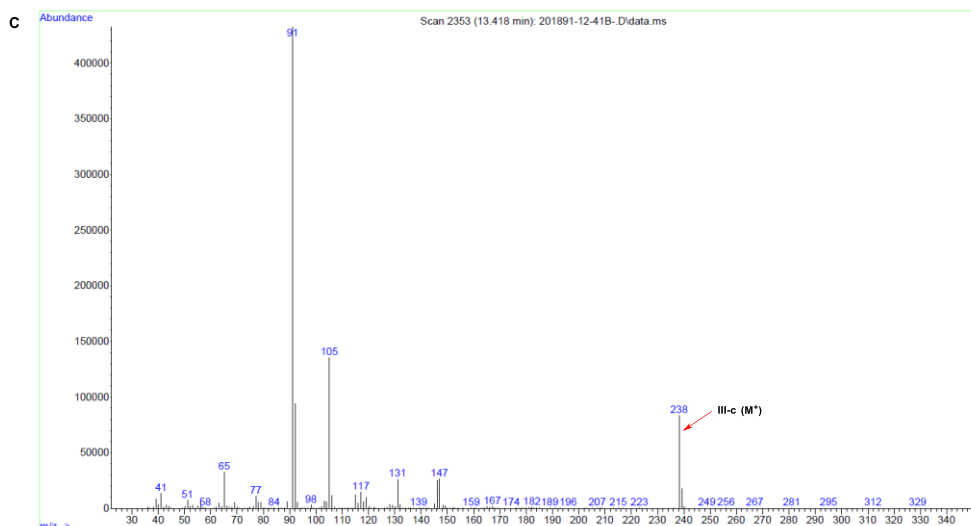

**Figure S2.** GC-MS analysis of the reaction of **5c** with **1g**. (A) GC analysis of the reaction; (B) MS analysis of **IV-c**; (C) MS analysis of **III-c**.

#### 4. (Fluoro)alkylation of Alkenes **5** with (Fluoro)alkylhalides **1** Promoted by Photolysis of Alkylzirconocenes

##### General Procedure A

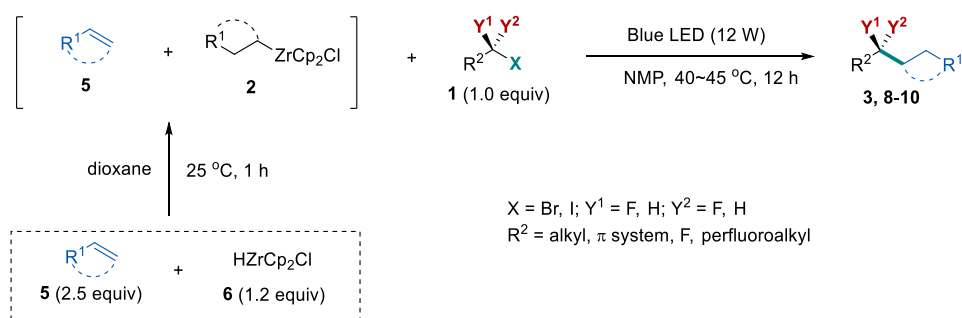

To a 25 mL of Schlenk tube was added  $\text{ZrCp}_2\text{HCl}$  (1.2 equiv, 0.36 mmol) in the glovebox. The tube was then taken out of the glovebox, and was evacuated and backfilled with Ar (3 times). Alkene **5** (2.5 equiv, 0.75 mmol) and anhydrous dioxane (1.0 mL) were added under Ar. The resulting mixture was stirred at room temperature for 1 h until a clear yellow solution was obtained. To another 25 mL of Schlenk tube were added difluoroalkyl halide **1** (0.3 mmol, 1.0 equiv) and NMP (3.0 mL) under Ar. The prepared solution of alkylzirconocene and alkene was then added to the mixture via a syringe for 1 min under Ar. The reaction mixture was stirred at 40~45 °C under irradiation of a 12 W blue LEDs strip for 12 h. The reaction mixture was then cooled to room temperature. The reaction mixture was poured into water (50 mL) and extracted with EA (30 mL  $\times$  2). The combined organic layers were

washed by brine, dried over anhydrous sodium sulfate, filtered, and concentrated. The product was purified with flash column chromatography.

### General Procedure B

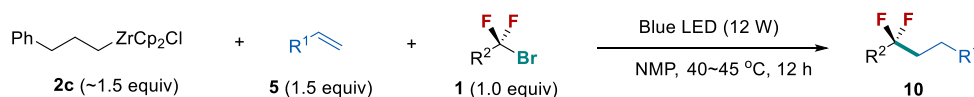

**Preparation of 2c:** To a 25 mL of Schlenk tube was added  $\text{ZrCp}_2\text{HCl}$  **6** (2.0 equiv, 0.6 mmol, the loading amount of **6** was calculated based on **1**) in the glovebox. The tube was taken out of the glovebox, and was then evacuated and backfilled with Ar (3 times). Allylbenzene **5c** (1.5 equiv, 0.45 mmol, the loading amount of **5c** was calculated based on **1**) and anhydrous dioxane (1.0 mL) were added under Ar. The mixture was stirred for 1 h at about 40 °C until a clear yellow solution was obtained.

**Reaction of 5 with 1 in the presence of 2c:** To a 25 mL of Schlenk tube were added difluoroalkyl **1** (0.3 mmol, 1.0 equiv), alkene **5** (0.45 mmol, 1.5 equiv), and NMP (3.0 mL). The prepared alkylzirconocene **2c** (~1.5 equiv) was then added to the reaction mixture for 1 min under Ar. The reaction was stirred at 40~45 °C under irradiation of a 12 W blue LEDs strip for 12 h. The reaction mixture was then cooled to room temperature. The reaction mixture was poured into water (50 mL) and extracted with EA (30 mL× 2). The combined organic layers were washed by brine, dried over anhydrous sodium sulfate, filtered, and concentrated. The product was purified by flash column chromatography.

**Note:** Excessive  $\text{ZrCp}_2\text{HCl}$  **6** used for the preparation of **2c** can be quenched by NMP.<sup>16</sup> Therefore, it cannot influence the reaction.

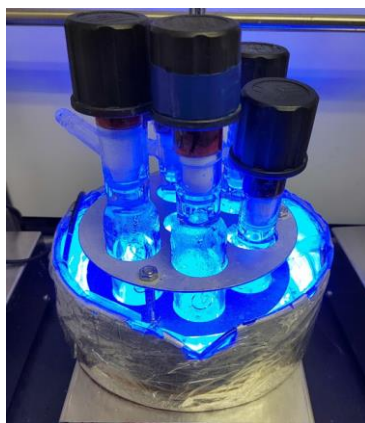

**Figure S3. Synthesis of compounds 3, 8-10.**

## 5. Characterization Data for Compounds 3, 8-10.

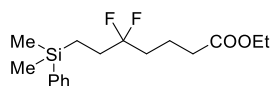

### **Ethyl 7-(dimethyl(phenyl)silyl)-5,5-difluoroheptanoate (3a). General**

**Procedure A:** The product (61 mg, 62% yield) was purified by flash column chromatography on silica gel (Petroleum ether: Ethyl acetate = 80:1) as a colorless oil.  $^1\text{H}$  NMR (400 MHz,  $\text{CDCl}_3$ )  $\delta$  7.56 – 7.45 (m, 2H), 7.42 – 7.31 (m, 3H), 4.14 (q,  $J$  = 7.2 Hz, 2H), 2.34 (t,  $J$  = 7.2 Hz, 2H), 1.92 – 1.73 (m, 6H), 1.26 (t,  $J$  = 7.2 Hz, 3H), 0.92 – 0.82 (m, 2H), 0.30 (s, 6H).  $^{19}\text{F}$  NMR (376 MHz,  $\text{CDCl}_3$ )  $\delta$  -99.9 – -100.4 (m, 2F).  $^{13}\text{C}$  NMR (126 MHz,  $\text{CDCl}_3$ )  $\delta$  173.0, 138.1, 133.5, 129.1, 127.9, 125.3 (t,  $J$  = 241.2 Hz), 60.4, 34.9 (t,  $J$  = 25.8 Hz), 33.7, 30.9 (t,  $J$  = 26.7 Hz), 17.8 (t,  $J$  = 4.8 Hz), 14.2, 7.7 (t,  $J$  = 3.4 Hz), -3.4. IR (thin film)  $\nu_{\text{max}}$  2922, 1731, 1456  $\text{cm}^{-1}$ . MS (EI)  $m/z$  (%), 313, 235, 135 (100), 81. HRMS (FI) calculated for  $\text{C}_{17}\text{H}_{26}\text{F}_2\text{O}_2\text{Si}$ : 328.1665; Found: 328.1671 ( $\text{M}$ ) $^+$ .

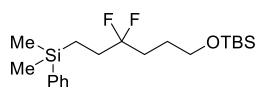

### **tert-Butyl(((6-(dimethyl(phenyl)silyl)-4,4-difluorohexyl)oxy)dimethylsilane**

**(3b). General Procedure A:** The product (74 mg, 64% yield) was purified by

flash column chromatography on silica gel (Petroleum ether: Ethyl acetate = 100:1) as a colorless oil.  $^1\text{H}$  NMR (400 MHz,  $\text{CDCl}_3$ )  $\delta$  7.55 – 7.46 (m, 2H), 7.41 – 7.33 (m, 3H), 3.62 (t,  $J$  = 6.2 Hz, 2H), 1.95 – 1.70 (m, 4H), 1.68 – 1.56 (m, 2H), 0.94 – 0.83 (m, 11H), 0.29 (s, 6H), 0.04 (s, 6H).  $^{19}\text{F}$  NMR (376 MHz,  $\text{CDCl}_3$ )  $\delta$  -99.5 – -99.8 (m, 2F).  $^{13}\text{C}$  NMR (126 MHz,  $\text{CDCl}_3$ )  $\delta$  138.2, 133.5, 129.1, 127.9, 125.8 (t,  $J$  = 241.3 Hz), 62.4, 32.2 (t,  $J$  = 25.8 Hz), 30.9 (t,  $J$  = 26.7 Hz), 25.9, 25.7 (t,  $J$  = 4.2 Hz), 18.3, 7.8 (t,  $J$  = 3.3 Hz), -3.3, -5.4. IR (thin film)  $\nu_{\text{max}}$  2929, 2857, 1463, 1360  $\text{cm}^{-1}$ . MS (EI)  $m/z$  (%), 157, 135 (100), 81. HRMS (EI) calculated for  $\text{C}_{20}\text{H}_{36}\text{F}_2\text{OSi}_2$ : 386.2267; Found: 386.2274 ( $\text{M}$ ) $^+$ .

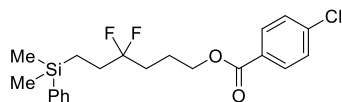

### **6-(Dimethyl(phenyl)silyl)-4,4-difluorohexyl 4-chlorobenzoate (3c).**

**General Procedure A:** The product (81 mg, 66% yield) was purified by flash column chromatography on silica gel (Petroleum ether: Ethyl acetate = 80:1) as a colorless oil.  $^1\text{H}$  NMR (400 MHz,  $\text{CDCl}_3$ )  $\delta$  7.96 (d,  $J$  = 8.6 Hz, 2H), 7.52 – 7.46 (m, 2H), 7.40 (d,  $J$  = 8.6 Hz, 2H), 7.38 – 7.34 (m, 3H), 4.33 (t,  $J$  = 5.8 Hz, 2H), 2.03 – 1.88 (m, 4H), 1.87 – 1.72 (m, 2H), 0.94 – 0.86 (m, 2H), 0.29 (s, 6H).  $^{19}\text{F}$  NMR (376 MHz,  $\text{CDCl}_3$ )  $\delta$  -100.5 – -100.7 (m, 2F).  $^{13}\text{C}$  NMR (126 MHz,  $\text{CDCl}_3$ )  $\delta$  165.6, 139.4, 138.0, 133.5, 130.9, 129.2, 128.7, 128.6, 127.9, 125.1 (t,  $J$  = 241.8 Hz), 64.5, 32.4 (t,

$J = 26.2$  Hz), 31.1 (t,  $J = 26.6$  Hz), 21.8 (t,  $J = 4.5$  Hz), 7.8 (t,  $J = 3.2$  Hz), -3.4. IR (thin film)  $\nu_{\max}$  3049, 2870, 1723, 1450  $\text{cm}^{-1}$ . MS (DART)  $m/z$  (%) 428 ( $\text{M}+\text{NH}_4$ )<sup>+</sup>. HRMS (DART) calculated for  $\text{C}_{21}\text{H}_{29}\text{F}_2\text{O}_2\text{NSiCl}$ : 428.1619; Found: 428.1612 ( $\text{M}+\text{NH}_4$ )<sup>+</sup>.

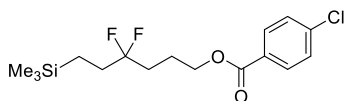

#### **4,4-Difluoro-6-(trimethylsilyl)hexyl 4-chlorobenzoate (3d). General**

##### **Procedure A, Gram-scale Synthesis:**

To a 50 mL of Schlenk tube was added  $\text{ZrCp}_2\text{HCl}$  (1.2 equiv, 4.8 mmol) in the glovebox. The tube was then taken out of the glovebox, and was evacuated and backfilled with Ar (3 times). Alkene **5b** (2.5 equiv, 10 mmol) and anhydrous dioxane (13 mL) were added under Ar. The resulting mixture was stirred at room temperature for 1 h until a clear yellow solution was obtained. To another 100 mL of Schlenk tube were added difluoroalkyl halide **1c** (4 mmol, 1.0 equiv) and NMP (40 mL) under Ar. The prepared solution of alkylzirconocene and alkene was then added to the reaction mixture via a syringe for 10 min under Ar. The reaction mixture was stirred at 40~45 °C under irradiation of a 12 W blue LEDs strip for 12 h. The reaction mixture was then cooled to room temperature. The reaction mixture was poured into water (200 mL) and extracted with EA (150 mL  $\times$  2). The combined organic layers were washed by brine, dried over anhydrous sodium sulfate, filtered, and concentrated. The product was purified with flash column chromatography (Petroleum ether: Ethyl acetate = 60:1) to give product **3d** (68%, 0.95 g). <sup>1</sup>H NMR (400 MHz,  $\text{CDCl}_3$ )  $\delta$  7.97 (d,  $J = 8.6$  Hz, 2H), 7.42 (d,  $J = 8.6$  Hz, 2H), 4.36 (t,  $J = 5.4$  Hz, 2H), 2.08 – 1.91 (m, 4H), 1.89 – 1.70 (m, 2H), 0.70 – 0.56 (m, 2H), 0.01 (s, 9H). <sup>19</sup>F NMR (376 MHz,  $\text{CDCl}_3$ )  $\delta$  -100.1 – -100.6 (m, 2F). <sup>13</sup>C NMR (101 MHz,  $\text{CDCl}_3$ )  $\delta$  165.6, 139.4, 130.9, 128.7, 128.6, 125.2 (t,  $J = 242.1$  Hz), 64.5, 32.4 (t,  $J = 26.4$  Hz), 31.2 (t,  $J = 26.7$  Hz), 21.8, 8.6, -2.0. IR (thin film)  $\nu_{\max}$  2855, 1724, 1450  $\text{cm}^{-1}$ . MS (EI)  $m/z$  (%) 213, 175, 139 (100), 73. HRMS (FI) calculated for  $\text{C}_{16}\text{H}_{24}\text{F}_2\text{O}_2\text{SiCl}$ : 349.1197; Found: 349.1203 ( $\text{M}+\text{H}$ )<sup>+</sup>.

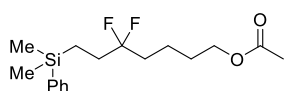

#### **7-(Dimethyl(phenyl)silyl)-5,5-difluoroheptyl acetate (3e). General**

##### **Procedure A:**

The product (70 mg, 71% yield) was purified by flash column chromatography on silica gel (Petroleum ether: Ethyl acetate = 80:1) as a colorless oil. <sup>1</sup>H NMR (400 MHz,  $\text{CDCl}_3$ )  $\delta$  7.55 – 7.46 (m, 2H), 7.42 – 7.33 (m, 3H), 4.07 (t,  $J = 6.4$  Hz, 2H), 2.05 (s, 3H), 1.92 – 1.71 (m, 4H), 1.70 – 1.60 (m, 2H), 1.58 – 1.45 (m, 2H), 0.94 – 0.83 (m, 2H), 0.31 (s, 6H). <sup>19</sup>F NMR

(376 MHz, CDCl<sub>3</sub>)  $\delta$  -100.1 – -100.3 (m, 2F). <sup>13</sup>C NMR (101 MHz, CDCl<sub>3</sub>)  $\delta$  171.0, 138.1, 133.5, 129.1, 127.9, 125.3 (t,  $J$  = 242.8 Hz), 64.0, 35.2 (t,  $J$  = 25.9 Hz), 30.9 (t,  $J$  = 26.8 Hz), 28.3, 20.9, 18.8 (t,  $J$  = 4.7 Hz), 7.8 (t,  $J$  = 3.2 Hz), -3.4. IR (thin film)  $\nu_{\max}$  1740, 1461, 1366 cm<sup>-1</sup>. MS (FI)  $m/z$  (%) 251, 179, 135 (100), 95. HRMS (FI) calculated for C<sub>17</sub>H<sub>27</sub>F<sub>2</sub>O<sub>2</sub>Si: 329.1743; Found: 329.1741 (M+H)<sup>+</sup>.

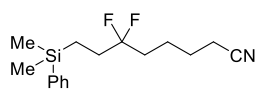

**8-(Dimethyl(phenyl)silyl)-6,6-difluorooctanenitrile (3f). General Procedure**

**A:** The product (59 mg, 67% yield) was purified by flash column chromatography on silica gel (Petroleum ether: Ethyl acetate = 40:1) as a colorless oil. <sup>1</sup>H NMR (400 MHz, CDCl<sub>3</sub>)  $\delta$  7.54 – 7.48 (m, 2H), 7.42 – 7.34 (m, 3H), 2.35 (t,  $J$  = 7.0 Hz, 2H), 1.95 – 1.66 (m, 6H), 1.64 – 1.54 (m, 2H), 0.94 – 0.82 (m, 2H), 0.31 (s, 6H). <sup>19</sup>F NMR (376 MHz, CDCl<sub>3</sub>)  $\delta$  -100.1 – -100.4 (m, 2F). <sup>13</sup>C NMR (101 MHz, CDCl<sub>3</sub>)  $\delta$  138.0, 133.5, 129.1, 127.9, 125.0 (t,  $J$  = 242.3 Hz), 119.3, 34.8 (t,  $J$  = 26.2 Hz), 31.1 (t,  $J$  = 26.8 Hz), 25.1, 21.5 (t,  $J$  = 4.6 Hz), 17.0, 7.8 (t,  $J$  = 3.6 Hz), -3.4. IR (thin film)  $\nu_{\max}$  3069, 3010, 2247, 1464, 1362 cm<sup>-1</sup>. MS (EI)  $m/z$  (%) 295 (M)<sup>+</sup>, 280, 135 (100), 91. HRMS (EI) calculated for C<sub>16</sub>H<sub>23</sub>F<sub>2</sub>NSi: 295.1562; Found: 295.1567 (M)<sup>+</sup>.

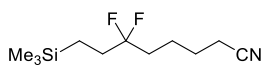

**6,6-Difluoro-8-(trimethylsilyl)octanenitrile (3g). General Procedure A,**

**Gram-scale Synthesis:** To a 100 mL of Schlenk tube was added ZrCp<sub>2</sub>HCl (1.2

equiv, 12 mmol) in the glovebox. The tube was then taken out of the glovebox, and was evacuated and backfilled with Ar (3 times). Alkene **5b** (2.5 equiv, 25 mmol) and anhydrous dioxane (33 mL) were added under Ar. The resulting mixture was stirred at room temperature for 1 h until a clear yellow solution was obtained. To another 350 mL of Schlenk tube were added difluoroalkyl halide **1e** (10 mmol, 1.0 equiv) and NMP (130 mL) under Ar. The prepared solution of alkylzirconocene and alkene was then added to the reaction mixture via a syringe for 10 min under Ar. The reaction mixture was stirred at 40~45 °C under irradiation of a 12 W blue LEDs strip for 12 h. The reaction mixture was then cooled to room temperature. The reaction mixture was poured into water (200 mL) and extracted with EA (150 mL × 2). The combined organic layers were washed by brine, dried over anhydrous sodium sulfate, filtered, and concentrated. The product was purified with flash column chromatography (Petroleum ether: Ethyl acetate = 40:1) to give product **3g** (66%, 1.54 g) as a colorless

oil.  $^1\text{H}$  NMR (400 MHz,  $\text{CDCl}_3$ )  $\delta$  2.37 (t,  $J$  = 6.8 Hz, 2H), 1.97 – 1.57 (m, 8H), 0.70 – 0.48 (m, 2H), 0.01 (s, 9H).  $^{19}\text{F}$  NMR (376 MHz,  $\text{CDCl}_3$ )  $\delta$  -99.9 – -100.2 (m, 2F).  $^{13}\text{C}$  NMR (101 MHz,  $\text{CDCl}_3$ )  $\delta$  125.2 (t,  $J$  = 242.2 Hz), 119.3, 34.7 (t,  $J$  = 26.1 Hz), 31.1 (t,  $J$  = 26.5 Hz), 25.1, 21.5 (t,  $J$  = 4.5 Hz), 17.0, 8.6, -2.1. IR (thin film)  $\nu_{\text{max}}$  2898, 2248, 1465, 1361  $\text{cm}^{-1}$ . MS (FI)  $m/z$  (%) 233 ( $\text{M}^+$ ), 218, 73 (100). HRMS (FI) calculated for  $\text{C}_{11}\text{H}_{21}\text{F}_2\text{NSi}$ : 233.1411; Found: 233.1405 ( $\text{M}^+$ ).

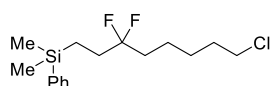

**(8-Chloro-3,3-difluorooctyl)dimethyl(phenyl)silane (3h). General**

**Procedure A:** The product (69 mg, 72% yield) was purified by flash column chromatography on silica gel (Petroleum ether: Ethyl acetate = 100:1) as a colorless oil.  $^1\text{H}$  NMR (400 MHz,  $\text{CDCl}_3$ )  $\delta$  7.57–7.50 (m, 2H), 7.43 – 7.38 (m, 3H), 3.55 (t,  $J$  = 6.6 Hz, 2H), 1.93 – 1.72 (m, 6H), 1.54 – 1.42 (m, 4H), 0.95 – 0.86 (m, 2H), 0.33 (s, 6H).  $^{19}\text{F}$  NMR (376 MHz,  $\text{CDCl}_3$ )  $\delta$  -99.8 – -100.2 (m, 2F).  $^{13}\text{C}$  NMR (101 MHz,  $\text{CDCl}_3$ )  $\delta$  138.1, 133.5, 129.1, 127.9, 125.4 (t,  $J$  = 241.5 Hz), 44.7, 35.50 (t,  $J$  = 25.8 Hz), 32.3, 30.9 (t,  $J$  = 26.9 Hz), 26.6, 21.5 (t,  $J$  = 4.7 Hz), -3.4. IR (thin film)  $\nu_{\text{max}}$  2868, 1670, 1464, 1357  $\text{cm}^{-1}$ . MS (EI)  $m/z$  (%) 185, 135 (100), 91, 74. HRMS (FI) calculated for  $\text{C}_{16}\text{H}_{25}\text{F}_2\text{ClSi}$ : 318.1377; Found: 318.1380 ( $\text{M}^+$ ).

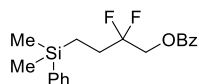

**4-(Dimethyl(phenyl)silyl)-2,2-difluorobutyl benzoate (3i). General Procedure A:**

3.5 equiv of alkene **5a** and 1.8 equiv of **6** were used. The product (68 mg, 65% yield) was purified by flash column chromatography on silica gel (Petroleum ether: Ethyl acetate = 80:1) as a colorless oil.  $^1\text{H}$  NMR (400 MHz,  $\text{CDCl}_3$ )  $\delta$  8.04 (d,  $J$  = 7.6 Hz, 2H), 7.62 (t,  $J$  = 7.2 Hz, 1H), 7.55 – 7.44 (m, 4H), 7.41 – 7.30 (m, 3H), 4.53 (t,  $J$  = 12.2 Hz, 2H), 2.19 – 1.82 (m, 2H), 1.13 – 0.88 (m, 2H), 0.34 (s, 6H).  $^{19}\text{F}$  NMR (376 MHz,  $\text{CDCl}_3$ )  $\delta$  -106.7 (tt,  $J$  = 16.2 Hz, 12.4 Hz, 2F).  $^{13}\text{C}$  NMR (101 MHz,  $\text{CDCl}_3$ )  $\delta$  165.5, 137.7, 133.44, 133.41, 129.8, 129.1, 128.5, 127.9, 122.2 (t,  $J$  = 243.4 Hz), 63.5 (t,  $J$  = 34.4 Hz), 28.6 (t,  $J$  = 25.1 Hz), 7.33 (t,  $J$  = 3.0 Hz), -3.4. IR (thin film)  $\nu_{\text{max}}$  3069, 2956, 1731, 1451  $\text{cm}^{-1}$ . MS (EI)  $m/z$  (%) 348 ( $\text{M}^+$ ), 333, 135, 105 (100), 77. HRMS (EI) calculated for  $\text{C}_{19}\text{H}_{22}\text{F}_2\text{O}_2\text{Si}$ : 348.1352; Found: 348.1347 ( $\text{M}^+$ ).

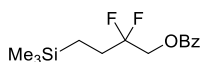

**2,2-Difluoro-4-(trimethylsilyl)butyl benzoate (3j). General Procedure A:** 3.5

equiv of alkene **5b** and 1.8 equiv of **6** were used. The product (52 mg, 60% yield) was purified by flash column chromatography on silica gel (Petroleum ether: Ethyl acetate = 80:1) as a colorless oil.  $^1\text{H}$  NMR (400 MHz,  $\text{CDCl}_3$ )  $\delta$  8.07 (d,  $J$  = 7.8 Hz, 2H), 7.60 (t,  $J$  = 7.8 Hz, 1H), 7.47 (t,  $J$  = 7.8 Hz, 2H), 4.52 (t,  $J$  = 12.6 Hz, 2H), 2.06 – 1.84 (m, 2H), 0.79 – 0.61 (m, 2H), 0.03 (s, 9H).  $^{19}\text{F}$  NMR (376 MHz,  $\text{CDCl}_3$ )  $\delta$  -106.8 (tt,  $J$  = 16.5 Hz, 12.4 Hz, 2F).  $^{13}\text{C}$  NMR (101 MHz,  $\text{CDCl}_3$ )  $\delta$  165.5, 133.4, 129.8, 129.2, 128.5, 122.27 (t,  $J$  = 243.2 Hz), 63.6 (t,  $J$  = 34.1 Hz), 28.7 (t,  $J$  = 25.0 Hz), 8.1, -2.1. IR (thin film)  $\nu_{\text{max}}$  2954, 1732, 1452, 1354  $\text{cm}^{-1}$ . MS (EI)  $m/z$  (%) 286 ( $\text{M}^+$ ), 271, 179, 105 (100), 77. HRMS (FI) calculated for  $\text{C}_{14}\text{H}_{20}\text{F}_2\text{O}_2\text{Si}$ : 286.1195; Found: 286.1189 ( $\text{M}^+$ ).

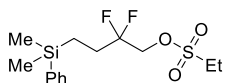

**7-(Dimethyl(phenyl)silyl)-5,5-difluoroheptyl acetate (3k). General Procedure**

**A:** 3.5 equiv of alkene **5a** and 1.8 equiv of **6** were used. The product (64 mg, 63% yield) was purified by flash column chromatography on silica gel (Petroleum ether: Ethyl acetate = 10:1) as a colorless oil.  $^1\text{H}$  NMR (400 MHz,  $\text{CDCl}_3$ )  $\delta$  7.54 – 7.46 (m, 2H), 7.42 – 7.35 (m, 3H), 4.30 (t,  $J$  = 11.8 Hz, 2H), 3.17 (q,  $J$  = 7.4 Hz, 2H), 1.97 – 1.79 (m, 2H), 1.41 (t,  $J$  = 7.4 Hz, 3H), 0.95 – 0.86 (m, 2H), 0.32 (s, 6H).  $^{19}\text{F}$  NMR (376 MHz,  $\text{CDCl}_3$ )  $\delta$  -107.3 (tt,  $J$  = 16.2 Hz, 11.9 Hz, 2F).  $^{13}\text{C}$  NMR (101 MHz,  $\text{CDCl}_3$ )  $\delta$  137.6, 133.5, 129.2, 127.9, 121.2 (t,  $J$  = 243.7 Hz), 66.8 (t,  $J$  = 35.0 Hz), 45.5, 28.3 (t,  $J$  = 24.6 Hz), 8.0, 7.1 (t,  $J$  = 3.0 Hz), -3.5. IR (thin film)  $\nu_{\text{max}}$  1458, 1462, 1170, 1114, 1057, 1018  $\text{cm}^{-1}$ . MS (EI)  $m/z$  (%) 321, 179, 135 (100), 91. HRMS (EI) calculated for  $\text{C}_{14}\text{H}_{22}\text{F}_2\text{O}_3\text{SSi}$ : 336.1021; Found: 336.1024 ( $\text{M}^+$ ).

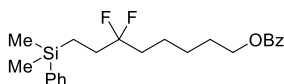

**8-(Dimethyl(phenyl)silyl)-6,6-difluorooctyl benzoate (3l). General**

**Procedure A:** 3.5 equiv of alkene **5a** and 1.8 equiv of **6** were used. The product (55 mg, 45% yield) was purified by flash column chromatography on silica gel (Petroleum ether: Ethyl acetate = 80:1) as a colorless oil.  $^1\text{H}$  NMR (400 MHz,  $\text{CDCl}_3$ )  $\delta$  8.05 (d,  $J$  = 7.6 Hz, 2H), 7.56 (t,  $J$  = 7.0 Hz, 1H), 7.53 – 7.48 (m, 2H), 7.44 (t,  $J$  = 7.4 Hz, 2H), 7.40 – 7.33 (m, 3H), 4.32 (t,  $J$  = 6.6 Hz, 2H), 1.93 – 1.68 (m, 6H), 1.58 – 1.42 (m, 4H), 0.94 – 0.82 (m, 2H), 0.30 (s, 6H).  $^{19}\text{F}$  NMR (376 MHz,  $\text{CDCl}_3$ )  $\delta$  -99.7 – -100.1 (m, 2F).  $^{13}\text{C}$  NMR (126 MHz,  $\text{CDCl}_3$ )  $\delta$  166.6, 138.1, 133.5, 132.8,

130.4, 129.5, 129.1, 128.3, 127.9, 125.5 (t,  $J = 241.3$  Hz), 64.8, 35.6 (t,  $J = 25.6$  Hz), 30.9 (t,  $J = 26.8$  Hz), 28.5, 25.9, 21.9 (t,  $J = 4.5$  Hz), 7.8 (t,  $J = 3.4$  Hz), -3.4. IR (thin film)  $\nu_{\max}$  2867, 1719, 1451  $\text{cm}^{-1}$ . MS (EI)  $m/z$  (%) 241, 135, 105 (100), 77. HRMS (EI) calculated for  $\text{C}_{23}\text{H}_{30}\text{F}_2\text{O}_2\text{Si}$ : 404.1978; Found: 404.1980 ( $\text{M}$ )<sup>+</sup>.

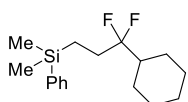

**(3-Cyclohexyl-3,3-difluoropropyl)dimethyl(phenyl)silane (3m). General**

**Procedure A:** The product (38 mg, 43% yield) was purified by flash column chromatography on silica gel (PE) as a colorless oil.  $^1\text{H}$  NMR (400 MHz,  $\text{CDCl}_3$ )  $\delta$  7.55 – 7.48 (m, 2H), 7.41 – 7.33 (m, 3H), 1.86 – 1.70 (m, 7H), 1.23 – 1.08 (m, 6H), 0.93 – 0.84 (m, 2H), 0.29 (s, 6H).  $^{19}\text{F}$  NMR (376 MHz,  $\text{CDCl}_3$ )  $\delta$  -107.4 – -107.5 (m, 2F).  $^{13}\text{C}$  NMR (126 MHz,  $\text{CDCl}_3$ )  $\delta$  138.3, 133.5, 129.1, 128.2, 126.2 (t,  $J = 243.4$  Hz), 43.1 (t,  $J = 23.9$  Hz), 28.4 (t,  $J = 27.4$  Hz), 26.0, 25.8, 25.7 (t,  $J = 4.5$  Hz), 7.10 (t,  $J = 3.7$  Hz), -3.3. IR (thin film)  $\nu_{\max}$  2932, 2855, 1453, 1379  $\text{cm}^{-1}$ . MS (EI)  $m/z$  (%) 185, 135 (100), 81. HRMS (EI) calculated for  $\text{C}_{17}\text{H}_{26}\text{F}_2\text{Si}$ : 296.1766; Found: 296.1771 ( $\text{M}$ )<sup>+</sup>.

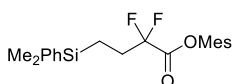

**Mesityl 4-(dimethyl(phenyl)silyl)-2,2-difluorobutanoate (3n). General**

**Procedure A:** The product (96 mg, 85% yield) was purified by flash column chromatography on silica gel (Petroleum ether: Ethyl acetate = 60:1) as a colorless oil.  $^1\text{H}$  NMR (400 MHz,  $\text{CDCl}_3$ )  $\delta$  7.59 – 7.53 (m, 2H), 7.46 – 7.39 (m, 3H), 6.93 (s, 2H), 2.32 (s, 3H), 2.30 – 2.16 (m, 2H), 2.14 (s, 6H), 1.10 – 1.03 (m, 2H), 0.40 (s, 6H).  $^{19}\text{F}$  NMR (376 MHz,  $\text{CDCl}_3$ )  $\delta$  -106.2 (t,  $J = 16.0$  Hz, 2F).  $^{13}\text{C}$  NMR (101 MHz,  $\text{CDCl}_3$ )  $\delta$  162.3 (t,  $J = 34.9$  Hz), 144.9, 137.4, 136.1, 133.4, 129.5, 129.3, 129.2, 128.0, 117.0 (t,  $J = 251.9$  Hz), 29.5 (t,  $J = 24.2$  Hz), 20.7, 16.0, 7.1, -3.4. IR (thin film)  $\nu_{\max}$  3049, 2925, 2862, 1785, 1437  $\text{cm}^{-1}$ . MS (DART)  $m/z$  (%) 394 ( $\text{M}+\text{NH}_4$ )<sup>+</sup>. HRMS (DART) calculated for  $\text{C}_{21}\text{H}_{30}\text{O}_2\text{NF}_2\text{Si}$ : 394.2008; Found: 394.2002 ( $\text{M}+\text{NH}_4$ )<sup>+</sup>.

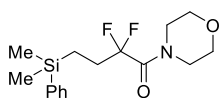

**4-(Dimethyl(phenyl)silyl)-2,2-difluoro-1-morpholinobutan-1-one (3o).**

**General Procedure A:** The product (80 mg, 82% yield) was purified by flash column chromatography on silica gel (Petroleum ether: Ethyl acetate = 10:1) as a colorless oil.  $^1\text{H}$  NMR (400 MHz,  $\text{CDCl}_3$ )  $\delta$  7.57 – 7.49 (m, 2H), 7.42 – 7.32 (m, 3H), 3.75 – 3.67 (m, 4H), 3.67 – 3.60



(m, 4H), 2.20 – 2.04 (m, 2H), 1.03 – 0.92 (m, 2H), 0.33 (s, 6H).  $^{19}\text{F}$  NMR (376 MHz,  $\text{CDCl}_3$ )  $\delta$  -100.9 (t,  $J$  = 17.5 Hz, 2F).  $^{13}\text{C}$  NMR (101 MHz,  $\text{CDCl}_3$ )  $\delta$  162.0 (t,  $J$  = 30.3 Hz), 137.9, 133.4, 129.0, 127.8, 119.5 (t,  $J$  = 255.0 Hz), 66.7, 66.6, 46.4 (t,  $J$  = 6.4 Hz), 43.2, 29.3 (t,  $J$  = 24.3 Hz), 6.7 (t,  $J$  = 2.7 Hz), -3.4. IR (thin film)  $\nu_{\text{max}}$  2923, 2857, 1670, 1435, 1363  $\text{cm}^{-1}$ . MS (EI)  $m/z$  (%) 312 (100), 250, 135. HRMS (EI) calculated for  $\text{C}_{16}\text{H}_{23}\text{F}_2\text{NO}_2\text{Si}$ : 327.1461; Found: 327.1468 ( $\text{M}$ ) $^{+}$ .

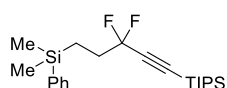

**(3,3-Difluoro-5-(triisopropylsilyl)pent-4-yn-1-yl)dimethyl(phenyl)silane (3p).**

**General Procedure A:** The product (79 mg, 67% yield) was purified by flash column chromatography on silica gel (PE) as a colorless oil.  $^1\text{H}$  NMR (400 MHz,  $\text{CDCl}_3$ )  $\delta$  7.55 – 7.48 (m, 2H), 7.42 – 7.35 (m, 3H), 2.07 – 1.91 (m, 2H), 1.16 – 1.07 (m, 21H), 1.07 – 1.00 (m, 2H), 0.32 (s, 6H).  $^{19}\text{F}$  NMR (376 MHz,  $\text{CDCl}_3$ )  $\delta$  -84.3 (t,  $J$  = 13.9 Hz, 2F).  $^{13}\text{C}$  NMR (126 MHz,  $\text{CDCl}_3$ )  $\delta$  137.9, 133.5, 129.2, 128.0, 115.3 (t,  $J$  = 233.6 Hz), 99.1 (t,  $J$  = 39.5 Hz), 89.9 (t,  $J$  = 5.5 Hz), 34.3 (t,  $J$  = 27.4 Hz), 18.5, 10.9, 8.8, -3.3. IR (thin film)  $\nu_{\text{max}}$  2867, 1463, 1367  $\text{cm}^{-1}$ . MS (EI)  $m/z$  (%) 199, 135 (100), 77. HRMS (EI) calculated for  $\text{C}_{22}\text{H}_{36}\text{F}_2\text{Si}_2$ : 394.2318; Found: 394.2326 ( $\text{M}$ ) $^{+}$ .

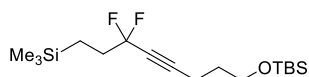

**tert-Butyl((6,6-Difluoro-8-(trimethylsilyl)oct-4-yn-1-yl)oxy)dimethylsilane (3q).**

**General Procedure A:** The product (71 mg, 68% yield) was purified by flash column chromatography on silica gel (PE) as a colorless oil.  $^1\text{H}$  NMR (400 MHz,  $\text{CDCl}_3$ )  $\delta$  3.69 (t,  $J$  = 6.0 Hz, 2H), 2.43 – 2.32 (m, 2H), 2.02 – 1.85 (m, 2H), 1.80 – 1.68 (m, 2H), 0.90 (s, 9H), 0.76 – 0.66 (m, 2H), 0.06 (s, 6H), 0.02 (s, 9H).  $^{19}\text{F}$  NMR (376 MHz,  $\text{CDCl}_3$ )  $\delta$  -83.1 (tt,  $J$  = 14.3, 4.9 Hz, 2F).  $^{13}\text{C}$  NMR (101 MHz,  $\text{CDCl}_3$ )  $\delta$  115.8 (t,  $J$  = 232.6 Hz), 88.1 (t,  $J$  = 6.6 Hz), 74.1 (t,  $J$  = 40.6 Hz), 61.2, 34.4 (t,  $J$  = 28.0 Hz), 30.9, 25.9, 18.3, 14.8, 9.2, -2.0, -5.4. IR (thin film)  $\nu_{\text{max}}$  2929, 2858, 2251, 1361  $\text{cm}^{-1}$ . MS (EI)  $m/z$  (%) 333, 199, 171, 105 (100). HRMS (EI) calculated for  $\text{C}_{17}\text{H}_{34}\text{F}_2\text{OSi}_2$ : 348.2111; Found: 348.2119 ( $\text{M}$ ) $^{+}$ .

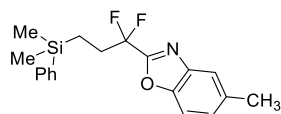

**2-(3-(Dimethyl(phenyl)silyl)-1,1-difluoropropyl)-5-methylbenzo[d]oxazole (3r).**

**General Procedure A:** The product (65 mg, 63% yield) was purified by flash column chromatography on silica gel (Petroleum ether: Ethyl acetate =

30:1) as a colorless oil.  $^1\text{H}$  NMR (400 MHz,  $\text{CDCl}_3$ )  $\delta$  7.59 (s, 1H), 7.55 – 7.49 (m, 2H), 7.47 (d,  $J$  = 8.2 Hz, 1H), 7.42 – 7.32 (m, 3H), 7.26 (d,  $J$  = 8.2 Hz, 1H), 2.49 (s, 3H), 2.45 – 2.30 (m, 2H), 1.05 – 0.96 (m, 2H), 0.33 (s, 6H).  $^{19}\text{F}$  NMR (376 MHz,  $\text{CDCl}_3$ )  $\delta$  -100.1 (t,  $J$  = 16.2 Hz, 2F).  $^{13}\text{C}$  NMR (126 MHz,  $\text{CDCl}_3$ )  $\delta$  158.3 (t,  $J$  = 34.7 Hz), 148.9, 140.2, 137.7, 135.2, 133.5, 129.2, 127.9, 127.8, 120.9, 117.3 (t,  $J$  = 242.2 Hz), 110.7, 30.9 (t,  $J$  = 24.8 Hz), 21.4, 7.0, -3.4. IR (thin film)  $\nu_{\text{max}}$  3022, 2926, 2869, 1458, 1358  $\text{cm}^{-1}$ . MS (EI)  $m/z$  (%) 330, 268, 191, 135 (100), 77, 91. HRMS (EI) calculated for  $\text{C}_{19}\text{H}_{21}\text{F}_2\text{NOSi}$ : 345.1355; Found: 345.1361 ( $\text{M}$ ) $^+$ .

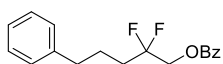

**2,2-Difluoro-5-phenylpentyl benzoate (8a). General Procedure A:** 3.5 equiv of alkene **5c** and 1.8 equiv of **6** were used. The product (55 mg, 58% yield was purified

by flash column chromatography on silica gel (Petroleum ether: Ethyl acetate = 80:1) as a colorless oil.  $^1\text{H}$  NMR (400 MHz,  $\text{CDCl}_3$ )  $\delta$  8.01 (d,  $J$  = 7.2 Hz, 2H), 7.59 (t,  $J$  = 7.4 Hz, 1H), 7.45 (t,  $J$  = 7.6 Hz, 2H), 7.27 (t,  $J$  = 7.6 Hz, 2H), 7.30 – 7.14 (m, 3H), 4.47 (t,  $J$  = 12.4 Hz, 2H), 2.69 (t,  $J$  = 7.4 Hz, 2H), 2.10 – 1.82 (m, 4H).  $^{19}\text{F}$  NMR (376 MHz,  $\text{CDCl}_3$ )  $\delta$  -105.3 (tt,  $J$  = 15.8, 12.8 Hz, 2F).  $^{13}\text{C}$  NMR (101 MHz,  $\text{CDCl}_3$ )  $\delta$  165.5, 141.1, 133.5, 129.8, 129.1, 128.5, 128.43, 128.37, 126.1, 121.7 (t,  $J$  = 243.0 Hz), 64.1 (t,  $J$  = 34.1 Hz), 35.2, 33.34 (t,  $J$  = 34.2 Hz), 23.3. IR (thin film)  $\nu_{\text{max}}$  2856, 1731, 1452  $\text{cm}^{-1}$ . MS (EI)  $m/z$  (%) 304 ( $\text{M}$ ) $^+$ , 182, 153, 105 (100), 91, 77. HRMS (EI) calculated for  $\text{C}_{18}\text{H}_{18}\text{F}_2\text{O}_2$ : 304.1269; Found: 304.1268 ( $\text{M}$ ) $^+$ .

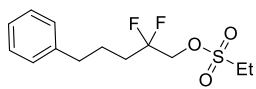

**2,2-Difluoro-5-phenylpentyl ethanesulfonate (8b). General Procedure A:** 3.5 equiv of alkene **5c** and 1.8 equiv of **6** were used. The product (48 mg, 55% yield)

was purified by flash column chromatography on silica gel (Petroleum ether: Ethyl acetate = 10:1) as a colorless oil.  $^1\text{H}$  NMR (400 MHz,  $\text{CDCl}_3$ )  $\delta$  7.35 – 7.27 (m, 2H), 7.25 – 7.16 (m, 3H), 4.28 (t,  $J$  = 11.8 Hz, 2H), 3.19 (q,  $J$  = 7.6 Hz, 2H), 2.69 (t,  $J$  = 7.2 Hz, 2H), 2.07 – 1.77 (m, 4H), 1.43 (t,  $J$  = 7.6 Hz, 3H).  $^{19}\text{F}$  NMR (376 MHz,  $\text{CDCl}_3$ )  $\delta$  -105.9 (tt,  $J$  = 16.5, 12.0 Hz).  $^{13}\text{C}$  NMR (101 MHz,  $\text{CDCl}_3$ )  $\delta$  140.9, 128.5, 128.3, 126.1, 120.8 (t,  $J$  = 244.3 Hz), 67.3 (t,  $J$  = 35.2 Hz), 45.5, 35.1, 32.9 (t,  $J$  = 23.5 Hz), 23.1 (t,  $J$  = 3.9 Hz), 8.0. IR (thin film)  $\nu_{\text{max}}$  2946, 1454, 1362  $\text{cm}^{-1}$ . MS (EI)  $m/z$  (%) 292 ( $\text{M}$ ) $^+$ , 182, 153, 91 (100). HRMS (EI) calculated for  $\text{C}_{13}\text{H}_{18}\text{F}_2\text{O}_3\text{S}$ : 292.0939; Found: 292.0942 ( $\text{M}$ ) $^+$ .

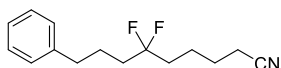

**6,6-Difluoro-9-phenylnonanenitrile (8c). General Procedure A:** 3.5 equiv

of alkene **5c** and 1.8 equiv of **6** were used. The product (37.0 mg, 49% yield)

was purified by flash column chromatography on silica gel (Petroleum ether: Ethyl acetate = 20:1) as a colorless oil.  $^1\text{H}$  NMR (400 MHz,  $\text{CDCl}_3$ )  $\delta$  7.29 (t,  $J$  = 7.2 Hz, 2H), 7.23 – 7.15 (m, 3H), 2.66 (t,  $J$  = 6.4 Hz, 2H), 2.35 (t,  $J$  = 6.8 Hz, 2H), 1.93 – 1.75 (m, 6H), 1.74 – 1.54 (m, 4H).  $^{19}\text{F}$  NMR (376 MHz,  $\text{CDCl}_3$ )  $\delta$  -98.3 – -98.6 (m, 2F).  $^{13}\text{C}$  NMR (101 MHz,  $\text{CDCl}_3$ )  $\delta$  141.4, 128.4, 128.3, 126.0, 124.6 (t,  $J$  = 241.9 Hz), 119.2, 35.9 (t,  $J$  = 25.6 Hz), 35.5 (d,  $J$  = 26.0 Hz), 35.3, 25.1, 23.9 (t,  $J$  = 4.5 Hz), 21.5 (t,  $J$  = 4.7 Hz), 17.0. IR (thin film)  $\nu_{\text{max}}$  3086, 3027, 2247, 1454  $\text{cm}^{-1}$ . MS (EI)  $m/z$  (%) 251 ( $\text{M}^+$ ), 104, 91 (100). HRMS (FI) calculated for  $\text{C}_{15}\text{H}_{19}\text{F}_2\text{N}$ : 251.1480; Found: 251.1483 ( $\text{M}^+$ ).

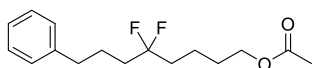

**5,5-Difluoro-8-phenyloctyl acetate (8d). General Procedure A:** 3.5 equiv

of alkene **5c** and 1.8 equiv of **6** were used. The product (41 mg, 48% yield)

was purified by flash column chromatography on silica gel (Petroleum ether: Ethyl acetate = 80:1) as a colorless oil.  $^1\text{H}$  NMR (400 MHz,  $\text{CDCl}_3$ )  $\delta$  7.29 (t,  $J$  = 7.2 Hz, 2H), 7.22 – 7.14 (m, 3H), 4.06 (t,  $J$  = 6.6 Hz, 2H), 2.66 (t,  $J$  = 7.0 Hz, 2H), 2.05 (s, 3H), 1.92 – 1.75 (m, 6H), 1.69 – 1.59 (m, 2H), 1.55 – 1.45 (m, 2H).  $^{19}\text{F}$  NMR (376 MHz,  $\text{CDCl}_3$ )  $\delta$  -98.2 – -98.5 (m, 2F).  $^{13}\text{C}$  NMR (126 MHz,  $\text{CDCl}_3$ )  $\delta$  171.2, 141.5, 128.4, 128.4, 126.0, 125.0 (t,  $J$  = 241.0 Hz), 64.0, 36.0 (t,  $J$  = 25.7 Hz), 35.9 (t,  $J$  = 25.5 Hz), 35.4, 28.3, 24.0 (t,  $J$  = 4.5 Hz), 21.0, 18.9 (t,  $J$  = 4.7 Hz). IR (thin film)  $\nu_{\text{max}}$  2928, 2855, 1730, 1454  $\text{cm}^{-1}$ . MS (EI)  $m/z$  (%) 284 ( $\text{M}^+$ ), 184, 117, 104 (100), 91. HRMS (FI) calculated for  $\text{C}_{16}\text{H}_{22}\text{F}_2\text{O}_2$ : 284.1582; Found: 284.1579 ( $\text{M}^+$ ).

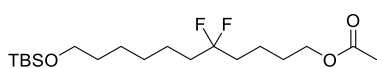

**11-((*tert*-Dutyldimethylsilyl)oxy)-5,5-difluoroundecyl acetate (8e).**

**General Procedure A:** 3.5 equiv of alkene **5d** and 1.8 equiv of **6**

were used. The product (59 mg, 52% yield) was purified by flash column chromatography on silica gel (Petroleum ether: Ethyl acetate = 80:1) as a colorless oil.  $^1\text{H}$  NMR (400 MHz,  $\text{CDCl}_3$ )  $\delta$  4.07 (t,  $J$  = 6.4 Hz, 2H), 3.60 (t,  $J$  = 6.4 Hz, 2H), 2.05 (s, 3H), 1.93 – 1.75 (m, 4H), 1.71 – 1.62 (m, 2H), 1.57 – 1.40 (m, 6H), 1.37 – 1.30 (m, 4H), 0.89 (s, 9H), 0.04 (s, 6H).  $^{19}\text{F}$  NMR (376 MHz,  $\text{CDCl}_3$ )  $\delta$  -98.1 – -98.4 (m, 2F).  $^{13}\text{C}$  NMR (151 MHz,  $\text{CDCl}_3$ )  $\delta$  171.2, 125.1 (t,  $J$  = 240.4 Hz), 64.0, 63.1, 36.4 (t,  $J$  =

25.1 Hz), 35.9 (t,  $J = 25.7$  Hz), 32.6, 29.2, 28.3, 26.0, 25.6, 22.3 (t,  $J = 4.5$  Hz), 21.0, 18.9 (t,  $J = 4.6$  Hz), -5.3. IR (thin film)  $\nu_{\max}$  2929, 2856, 1743, 1463  $\text{cm}^{-1}$ . MS (EI)  $m/z$  (%) 323, 261, 117 (100), 55. HRMS (FI) calculated for  $\text{C}_{19}\text{H}_{39}\text{F}_2\text{O}_3\text{Si}$ : 381.2631; Found: 381.2634 ( $\text{M}+\text{H}$ )<sup>+</sup>.

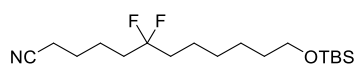

**12-((*tert*-Butyldimethylsilyl)oxy)-6,6-difluorododecanenitrile (8f).**

**General Procedure A:** 3.5 equiv of alkene **5d** and 1.8 equiv of **6** were used. The product (52 mg, 50% yield) was purified by flash column chromatography on silica gel (Petroleum ether: Ethyl acetate = 20:1) as a colorless oil. <sup>1</sup>H NMR (400 MHz,  $\text{CDCl}_3$ )  $\delta$  3.60 (t,  $J = 6.2$  Hz, 2H), 2.37 (t,  $J = 6.4$  Hz, 2H), 1.93 – 1.60 (m, 8H), 1.55 – 1.39 (m, 4H), 1.39 – 1.24 (m, 4H), 0.89 (s, 9H), 0.04 (s, 6H). <sup>19</sup>F NMR (376 MHz,  $\text{CDCl}_3$ )  $\delta$  -98.2 – -98.6 (m, 2F). <sup>13</sup>C NMR (126 MHz,  $\text{CDCl}_3$ )  $\delta$  124.8 (t,  $J = 240.6$  Hz), 119.3, 63.1, 36.4 (t,  $J = 25.3$  Hz), 35.4 (t,  $J = 25.8$  Hz), 32.6, 29.1, 25.9, 25.6, 25.1, 22.3 (t,  $J = 4.5$  Hz), 21.6 (t,  $J = 4.6$  Hz), 18.3, 17.1, -5.3. IR (thin film)  $\nu_{\max}$  2932, 2857, 2248, 1431  $\text{cm}^{-1}$ . MS (EI)  $m/z$  (%) 332, 317, 117, 140 (100), 77. HRMS (FI) calculated for  $\text{C}_{18}\text{H}_{36}\text{F}_2\text{NOSi}$ : 348.2529; Found: 348.2535 ( $\text{M}+\text{H}$ )<sup>+</sup>.

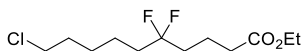

**Ethyl 10-chloro-5,5-difluorodecanoate (8g). General Procedure A:**

3.5 equiv of alkene **5e** and 1.8 equiv of **6** were used. The product (41 mg, 51% yield) was purified by flash column chromatography on silica gel (Petroleum ether: Ethyl acetate = 80:1) as a colorless oil. <sup>1</sup>H NMR (400 MHz,  $\text{CDCl}_3$ )  $\delta$  4.14 (q,  $J = 7.2$  Hz, 2H), 3.54 (t,  $J = 6.4$  Hz, 2H), 2.36 (t,  $J = 6.4$  Hz, 2H), 1.91 – 1.72 (m, 8H), 1.50 – 1.42 (m, 4H), 1.26 (t,  $J = 7.2$  Hz, 3H). <sup>19</sup>F NMR (376 MHz,  $\text{CDCl}_3$ )  $\delta$  -103.5 – -103.9 (m, 2F). <sup>13</sup>C NMR (126 MHz,  $\text{CDCl}_3$ )  $\delta$  173.0, 124.8 (t,  $J = 240.4$  Hz), 60.4, 44.8, 36.2 (t,  $J = 25.4$  Hz), 35.6 (t,  $J = 25.7$  Hz), 33.6, 32.3, 26.5, 21.5 (t,  $J = 4.6$  Hz), 17.8 (t,  $J = 4.9$  Hz), 14.2. IR (thin film)  $\nu_{\max}$  2940, 2870, 1735, 1463  $\text{cm}^{-1}$ . MS (EI)  $m/z$  (%) 270 ( $\text{M}$ )<sup>+</sup>, 160, 102 (100), 55. HRMS (FI) calculated for  $\text{C}_{12}\text{H}_{21}\text{F}_2\text{O}_2\text{Cl}$ : 270.1193; Found: 270.1191 ( $\text{M}$ )<sup>+</sup>.

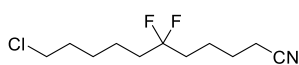

**11-Chloro-6,6-difluoroundecanenitrile (8h). General Procedure A:**

3.5 equiv of alkene **5e** and 1.8 equiv of **6** were used. The product (35 mg, 49% yield) was purified by flash column chromatography on silica gel (Petroleum ether: Ethyl acetate =

40:1) as a colorless oil.  $^1\text{H}$  NMR (500 MHz,  $\text{CDCl}_3$ )  $\delta$  3.54 (t,  $J$  = 6.5 Hz, 2H), 2.38 (t,  $J$  = 6.7 Hz, 2H), 1.91 – 1.76 (m, 6H), 1.76 – 1.69 (m, 2H), 1.68 – 1.61 (m, 2H), 1.52 – 1.47 (m, 4H).  $^{19}\text{F}$  NMR (376 MHz,  $\text{CDCl}_3$ )  $\delta$  -98.5 – -98.8 (m, 2F).  $^{13}\text{C}$  NMR (126 MHz,  $\text{CDCl}_3$ )  $\delta$  124.5 (t,  $J$  = 240.7 Hz), 119.3, 44.7, 36.3 (t,  $J$  = 25.3 Hz), 35.5 (t,  $J$  = 25.9 Hz), 32.3, 26.5, 25.1, 21.55 (t,  $J$  = 3.8 Hz), 21.51 (t,  $J$  = 3.8 Hz), 17.1. IR (thin film)  $\nu_{\text{max}}$  2958, 2871, 2247, 1464  $\text{cm}^{-1}$ . MS (EI)  $m/z$  (%) 236 ( $\text{M-H}^+$ ), 202, 182, 99 (100), 77. HRMS (EI) calculated for  $\text{C}_{11}\text{H}_{17}\text{NClF}_2$ : 236.1012; Found: 236.1015 ( $\text{M-H}^+$ ).

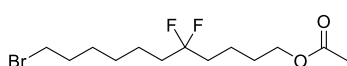

**11-Bromo-5,5-difluoroundecyl acetate (8i). General Procedure A:**

3.5 equiv of alkene **5f** and 1.8 equiv of **6** were used. The product (51 mg, 52% yield) was purified by flash column chromatography on silica gel (Petroleum ether: Ethyl acetate = 80:1) as a colorless oil.  $^1\text{H}$  NMR (400 MHz,  $\text{CDCl}_3$ )  $\delta$  4.07 (t,  $J$  = 6.4 Hz, 2H), 3.41 (t,  $J$  = 6.8 Hz, 2H), 2.05 (s, 3H), 1.92 – 1.73 (m, 6H), 1.72 – 1.63 (m, 2H), 1.58 – 1.52 (m, 2H), 1.50 – 1.41 (m, 4H), 1.40 – 1.32 (m, 2H).  $^{19}\text{F}$  NMR (376 MHz,  $\text{CDCl}_3$ )  $\delta$  -98.2 – -98.7 (m, 2F).  $^{13}\text{C}$  NMR (126 MHz,  $\text{CDCl}_3$ )  $\delta$  171.2, 124.9 (t,  $J$  = 240.5 Hz), 64.0, 36.3 (t,  $J$  = 21.6 Hz), 35.9 (t,  $J$  = 21.9 Hz), 33.8, 32.5, 28.5, 28.3, 27.9, 22.1 (t,  $J$  = 4.6 Hz), 21.0, 18.9 (t,  $J$  = 4.6 Hz). IR (thin film)  $\nu_{\text{max}}$  2935, 2857, 1739, 1461  $\text{cm}^{-1}$ . MS (EI)  $m/z$  (%) 309, 248 (100), 167, 149. HRMS (FI) calculated for  $\text{C}_{13}\text{H}_{23}\text{BrF}_2\text{O}_2$ : 328.0844; Found: 328.0846 ( $\text{M}^+$ ).

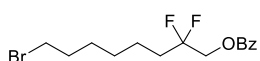

**8-Bromo-2,2-difluorooctyl benzoate (8j). General Procedure A:**

3.5 equiv of alkene **5f** and 1.8 equiv of **6** were used. The product (60 mg, 57% yield) was purified by flash column chromatography on silica gel (Petroleum ether: Ethyl acetate = 80:1) as a colorless oil.  $^1\text{H}$  NMR (400 MHz,  $\text{CDCl}_3$ )  $\delta$  8.12 – 8.00 (m, 2H), 7.60 (t,  $J$  = 7.6 Hz, 1H), 7.47 (t,  $J$  = 7.8 Hz, 2H), 4.49 (t,  $J$  = 12.4 Hz, 2H), 3.40 (t,  $J$  = 6.8 Hz, 2H), 2.07 – 1.91 (m, 2H), 1.90 – 1.80 (m, 2H), 1.65 – 1.52 (m, 2H), 1.51 – 1.35 (m, 4H).  $^{19}\text{F}$  NMR (376 MHz,  $\text{CDCl}_3$ )  $\delta$  -105.1 – -105.8 (m, 2F).  $^{13}\text{C}$  NMR (126 MHz,  $\text{CDCl}_3$ )  $\delta$  165.5, 133.5, 129.8, 129.0, 128.5, 121.7 (t,  $J$  = 241.9 Hz), 64.1 (t,  $J$  = 34.1 Hz), 33.8 (t,  $J$  = 23.7 Hz), 33.7, 32.4, 28.4, 27.8, 21.5 (t,  $J$  = 4.4 Hz). IR (thin film)  $\nu_{\text{max}}$  2935, 2857, 1731, 1452  $\text{cm}^{-1}$ . MS (EI)  $m/z$  (%) 348 ( $\text{M}^+$ ), 249, 105 (100), 77. HRMS (EI) calculated for  $\text{C}_{15}\text{H}_{19}\text{BrF}_2\text{O}_2$ : 348.0531; Found: 348.0527 ( $\text{M}^+$ ).

 **2,2-Difluoro-5-(4,4,5,5-tetramethyl-1,3,2-dioxaborolan-2-yl)pentyl benzoate (8k).**

**General Procedure A:** 3.5 equiv of alkene **5g** and 1.8 equiv of **6** were used. The product (61 mg, 60% yield) was purified by flash column chromatography on silica gel (Petroleum ether: Ethyl acetate = 10:1) as a colorless oil.  $^1\text{H}$  NMR (400 MHz,  $\text{CDCl}_3$ )  $\delta$  8.07 (d,  $J$  = 8.0 Hz, 2H), 7.59 (t,  $J$  = 7.4 Hz, 1H), 7.46 (t,  $J$  = 7.6 Hz, 2H), 4.48 (t,  $J$  = 12.4 Hz, 2H), 2.16 – 1.91 (m, 2H), 1.72 – 1.64 (m, 2H), 1.22 (s, 12H), 0.85 (t,  $J$  = 7.8 Hz, 2H).  $^{19}\text{F}$  NMR (376 MHz,  $\text{CDCl}_3$ )  $\delta$  -105.2 (tt,  $J$  = 16.5, 12.8 Hz, 2F).  $^{13}\text{C}$  NMR (126 MHz,  $\text{CDCl}_3$ )  $\delta$  165.6, 133.4, 129.8, 129.2, 128.5, 121.7 (t,  $J$  = 242.3 Hz), 83.1, 64.1 (t,  $J$  = 34.0 Hz), 36.3 (t,  $J$  = 23.6 Hz), 29.7, 24.8, 16.5. IR (thin film)  $\nu_{\text{max}}$  2929, 1732, 1452  $\text{cm}^{-1}$ . MS (EI)  $m/z$  (%) 353 ( $\text{M}^+$ ), 339, 105 (100), 77. HRMS (FI) calculated for  $\text{C}_{18}\text{H}_{25}^{10}\text{BF}_2\text{O}_4$ : 353.1845; Found: 353.1851 ( $\text{M}^+$ ).

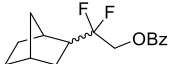 **2-((1S,4R)-Bicyclo[2.2.1]heptan-2-yl)-2,2-difluoroethyl benzoate (8l).**

**General Procedure A:** Alkylzirconocene was prepared as following: To a 25 mL of Schlenk tube was added  $\text{ZrCp}_2\text{HCl}$  **6** (1.8 equiv, 0.54 mmol) in the glovebox. The tube was then taken out of the glovebox, and was evacuated and backfilled with Ar (3 times). Alkene **5h** (3.5 equiv, 1.05 mmol) and anhydrous dioxane (1.0 mL) were added under Ar. The resulting mixture was stirred at 50 °C for 1 h until a clear yellow solution was obtained. The product (64 mg, 76% yield, dr > 20:1) was purified by flash column chromatography on silica gel (Petroleum ether: Ethyl acetate = 100:1) as a colorless oil.  $^1\text{H}$  NMR (400 MHz,  $\text{CDCl}_3$ )  $\delta$  8.13 – 8.02 (m, 2H), 7.60 (t,  $J$  = 7.6 Hz, 1H), 7.47 (t,  $J$  = 7.6 Hz, 2H), 4.50 (t,  $J$  = 12.8 Hz, 2H), 2.54 – 2.44 (m, 1H), 2.36 – 2.27 (m, 1H), 2.08 – 1.92 (m, 1H), 1.67 – 1.44 (m, 5H), 1.23 – 1.13 (m, 3H).  $^{19}\text{F}$  NMR (376 MHz,  $\text{CDCl}_3$ )  $\delta$  -108.7 – -109.6 (m, 1F), -111.4 – -112.8 (m, 1F).  $^{13}\text{C}$  NMR (101 MHz,  $\text{CDCl}_3$ )  $\delta$  165.6, 133.4, 129.8, 129.2, 128.5, 122.4 (t,  $J$  = 245.0 Hz), 63.6 (t,  $J$  = 33.5 Hz), 45.2 (t,  $J$  = 22.4 Hz), 37.2, 36.7, 35.8, 32.0, 30.6, 28.1. IR (thin film)  $\nu_{\text{max}}$  2874, 1731, 1452, 1371  $\text{cm}^{-1}$ . MS (EI)  $m/z$  (%) 280 ( $\text{M}^+$ ), 138, 105 (100), 77. HRMS (FI) calculated for  $\text{C}_{16}\text{H}_{18}\text{F}_2\text{O}_2$ : 280.1269; Found: 280.1272 ( $\text{M}^+$ ).

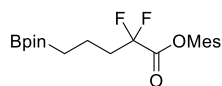

**Mesityl**

**2,2-difluoro-5-(4,4,5,5-tetramethyl-1,3,2-dioxaborolan-2-**

**yl)pentanoate (8m). General Procedure A:** 3.5 equiv of alkene **5g** and 1.8 equiv

of **6** were used. The product (75 mg, 65% yield) was purified by flash column chromatography on silica gel (Petroleum ether: Ethyl acetate = 20:1) as a colorless oil.  $^1\text{H}$  NMR (400 MHz,  $\text{CDCl}_3$ )  $\delta$  6.89 (s, 2H), 2.34 – 2.18 (m, 5H), 2.12 (s, 6H), 1.82 – 1.66 (m, 2H), 1.24 (s, 12H), 0.90 (t,  $J$  = 7.8 Hz, 2H).  $^{19}\text{F}$  NMR (376 MHz,  $\text{CDCl}_3$ )  $\delta$  -105.1 (t,  $J$  = 16.9 Hz, 2F).  $^{13}\text{C}$  NMR (126 MHz,  $\text{CDCl}_3$ )  $\delta$  162.4 (t,  $J$  = 33.1 Hz), 145.0, 136.1, 129.5, 129.3, 116.5 (t,  $J$  = 250.9 Hz), 83.2, 36.7 (t,  $J$  = 22.7 Hz), 24.8, 20.7, 16.2 (t,  $J$  = 4.4 Hz), 16.0. IR (thin film)  $\nu_{\text{max}}$  1785, 1411, 1380  $\text{cm}^{-1}$ . MS (EI)  $m/z$  (%) 382 ( $\text{M}^+$ ), 136 (100), 91. HRMS (FI) calculated for  $\text{C}_{20}\text{H}_{29}^{10}\text{BF}_2\text{O}_4$ : 381.2158; Found: 381.2155 ( $\text{M}^+$ ).

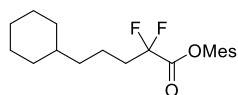

**Mesityl 5-cyclohexyl-2,2-difluoropentanoate (8n). General Procedure A:** 3.5

equiv of alkene **5i** and 1.8 equiv of **6** were used. The product (69 mg, 68% yield)

was purified by flash column chromatography on silica gel (Petroleum ether: Ethyl acetate = 100:1) as a colorless oil.  $^1\text{H}$  NMR (400 MHz,  $\text{CDCl}_3$ )  $\delta$  6.90 (s, 2H), 2.29 (s, 3H), 2.27 – 2.14 (m, 2H), 2.13 (s, 6H), 1.80 – 1.68 (m, 4H), 1.67 – 1.58 (m, 3H), 1.36 – 1.13 (m, 6H), 0.97 – 0.82 (m, 2H).  $^{19}\text{F}$  NMR (376 MHz,  $\text{CDCl}_3$ )  $\delta$  -105.0 (t,  $J$  = 16.9 Hz, 2F).  $^{13}\text{C}$  NMR (101 MHz,  $\text{CDCl}_3$ )  $\delta$  162.4 (t,  $J$  = 34.1 Hz), 145.0, 136.2, 129.5, 129.2, 116.7 (t,  $J$  = 251.5 Hz), 37.3, 36.9, 34.83 (t,  $J$  = 23.0 Hz), 33.2, 26.6, 26.3, 20.7, 18.9 (t,  $J$  = 3.9 Hz), 16.0. IR (thin film)  $\nu_{\text{max}}$  2924, 2851, 1785, 1448, 1378  $\text{cm}^{-1}$ . MS (EI)  $m/z$  (%) 338 ( $\text{M}^+$ ), 136 (100), 121. HRMS (EI) calculated for  $\text{C}_{20}\text{H}_{28}\text{F}_2\text{O}_2$ : 338.2052; Found: 338.2053 ( $\text{M}^+$ ).

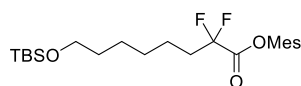

**Mesityl 8-((tert-butyldimethylsilyl)oxy)-2,2-difluorooctanoate (8o).**

**General Procedure A:** 3.5 equiv of alkene **5d** and 1.8 equiv of **6** were used.

The product (96 mg, 75% yield) was purified by flash column chromatography on silica gel (Petroleum ether: Ethyl acetate = 60:1) as a colorless oil.  $^1\text{H}$  NMR (400 MHz,  $\text{CDCl}_3$ )  $\delta$  6.91 (s, 2H), 3.63 (t,  $J$  = 6.4 Hz, 2H), 2.34 – 2.18 (m, 5H), 2.13 (s, 6H), 1.72 – 1.59 (m, 2H), 1.58 – 1.49 (m, 2H), 1.48 – 1.36 (m, 4H), 0.92 (s, 9H), 0.07 (s, 6H).  $^{19}\text{F}$  NMR (376 MHz,  $\text{CDCl}_3$ )  $\delta$  -105.1 (t,  $J$  = 16.9 Hz, 2F).  $^{13}\text{C}$  NMR (101 MHz,  $\text{CDCl}_3$ )  $\delta$  162.3 (t,  $J$  = 34.5 Hz), 145.0, 136.2, 129.5, 129.2, 116.6 (t,  $J$  = 251.5 Hz),

63.0, 34.4 (t,  $J = 23.2$  Hz), 32.6, 29.0, 25.9, 25.5, 21.5 (t,  $J = 3.9$  Hz), 20.7, 18.3, 16.0, -5.3. IR (thin film)  $\nu_{\text{max}}$  2829, 2857, 1786  $\text{cm}^{-1}$ . MS (EI)  $m/z$  (%) 371, 137, 121 (100), 107, 77. HRMS (FI) calculated for  $\text{C}_{23}\text{H}_{39}\text{F}_2\text{O}_3\text{Si}$ : 429.2631; Found: 429.2634 ( $\text{M}+\text{H}$ )<sup>+</sup>.

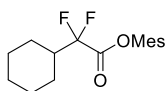

**Mesityl 2-cyclohexyl-2,2-difluoroacetate (8p). General Procedure A:**

Alkylzirconocene was prepared as following: To a 25 mL of Schlenk tube was added  $\text{ZrCp}_2\text{HCl}$  **6** (1.8 equiv, 0.54 mmol) in the glovebox. The tube was then taken out of the glovebox, and was evacuated and backfilled with Ar (3 times). Alkene **5j** (3.5 equiv, 1.05 mmol) and anhydrous dioxane (1.0 mL) were added under Ar. The resulting mixture was stirred at 50 °C for 1 h until a clear yellow solution was obtained. The product (62 mg, 70% yield) was purified by flash column chromatography on silica gel (Petroleum ether: Ethyl acetate = 100:1) as a colorless oil.  $^1\text{H}$  NMR (400 MHz,  $\text{CDCl}_3$ )  $\delta$  6.90 (s, 2H), 2.35 – 2.33 (m, 4H), 2.14 (s, 6H), 2.02 – 1.82 (m, 4H), 1.80 – 1.70 (m, 1H), 1.50 – 1.13 (m, 5H).  $^{19}\text{F}$  NMR (376 MHz,  $\text{CDCl}_3$ )  $\delta$  -112.3 (d,  $J = 14.7$  Hz).  $^{13}\text{C}$  NMR (101 MHz,  $\text{CDCl}_3$ )  $\delta$  162.4 (t,  $J = 34.3$  Hz), 145.1, 136.1, 129.5, 129.2, 117.6 (t,  $J = 253.5$  Hz), 42.1 (t,  $J = 21.7$  Hz), 25.8, 25.3, 24.8 (t,  $J = 3.7$  Hz), 20.7, 16.1. IR (thin film)  $\nu_{\text{max}}$  2934, 2858, 1784, 1453, 1378  $\text{cm}^{-1}$ . MS (EI)  $m/z$  (%) 296 ( $\text{M}$ )<sup>+</sup>, 136 (100), 91. HRMS (EI) calculated for  $\text{C}_{17}\text{H}_{22}\text{F}_2\text{O}_2$ : 296.1582; Found: 296.1586 ( $\text{M}$ )<sup>+</sup>.

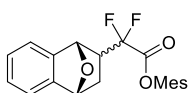

**Mesityl 2,2-difluoro-2-((1S,2S,4R)-1,2,3,4-tetrahydro-1,4-epoxynaphthalen-2-yl)acetate (8q). General Procedure A:**

Alkylzirconocene was prepared as following: To a 25 mL of Schlenk tube was added  $\text{ZrCp}_2\text{HCl}$  **6** (1.8 equiv, 0.54 mmol) in the glovebox. The tube was then taken out of the glovebox, and was evacuated and backfilled with Ar (3 times). Alkene **5k** (3.5 equiv, 1.05 mmol) and anhydrous dioxane (1.0 mL) were added under Ar. The resulting mixture was stirred at 50 °C for 1 h until a clear yellow solution was obtained. The product (65 mg, 60% yield, dr > 20:1) was purified by flash column chromatography on silica gel (Petroleum ether: Ethyl acetate = 40:1) as a white solid (m.p. 80 – 82 °C).  $^1\text{H}$  NMR (400 MHz,  $\text{CDCl}_3$ )  $\delta$  7.35 – 7.28 (m, 2H), 7.25 – 7.19 (m, 2H), 6.91 (s, 2H), 5.69 (s, 1H), 5.52 (d,  $J = 4.8$  Hz, 1H), 2.70 – 2.56 (m, 1H), 2.39 (dt,  $J = 12.0, 4.8$  Hz, 1H), 2.29 (s, 3H), 2.16 (s, 6H), 1.80 (dd,  $J = 12.0, 8.8$  Hz, 1H).  $^{19}\text{F}$  NMR (376 MHz,



CDCl<sub>3</sub>)  $\delta$  -105.6 (dd,  $J$  = 260.8, 12.8 Hz, 1F), -107.9 (dd,  $J$  = 260.8, 16.9 Hz, 1F). <sup>13</sup>C NMR (101 MHz, CDCl<sub>3</sub>)  $\delta$  162.0 (t,  $J$  = 33.7 Hz), 145.5, 145.1, 144.2, 136.3, 129.5, 129.2, 127.3, 127.0, 119.4, 119.1, 116.5 (t,  $J$  = 255.7 Hz), 78.7, 78.4 (t,  $J$  = 3.4 Hz), 45.7 (t,  $J$  = 22.9 Hz), 29.1, 20.7, 16.1. IR (thin film)  $\nu_{\max}$  3012, 2958, 1774, 1457, 1365 cm<sup>-1</sup>. MS (EI)  $m/z$  (%) 358 (M)<sup>+</sup> 136, 118 (100), 91. HRMS (EI) calculated for C<sub>21</sub>H<sub>20</sub>F<sub>2</sub>O<sub>3</sub>: 358.1375; Found: 358.1380 (M)<sup>+</sup>.

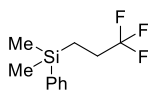

**Dimethyl(phenyl)(3,3,3-trifluoropropyl)silane (9a). General Procedure A:** The

product (49 mg, 70% yield) was purified by flash column chromatography on silica gel (PE) as a colorless oil. <sup>1</sup>H NMR (400 MHz, CDCl<sub>3</sub>)  $\delta$  7.57 – 7.48 (m, 2H), 7.46 – 7.35 (m, 3H), 2.14 – 1.92 (m, 2H), 1.07 – 0.95 (m, 2H), 0.35 (s, 6H). <sup>19</sup>F NMR (376 MHz, CDCl<sub>3</sub>)  $\delta$  -68.7 (t,  $J$  = 10.5 Hz, 3F). <sup>13</sup>C NMR (101 MHz, CDCl<sub>3</sub>)  $\delta$  137.4, 133.5, 129.4, 128.0, 127.7 (q,  $J$  = 277.9 Hz), 28.8 (q,  $J$  = 30.1 Hz), 7.6, -3.5. IR (thin film)  $\nu_{\max}$  3071, 3012, 1446, 1365 cm<sup>-1</sup>. MS (EI)  $m/z$  (%) 232 (M)<sup>+</sup>, 154, 135 (100), 91, 77. HRMS (EI) calculated for C<sub>11</sub>H<sub>15</sub>F<sub>3</sub>Si: 232.0890; Found: 232.0896 (M)<sup>+</sup>.

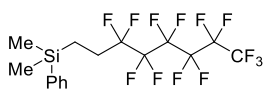

**Dimethyl(phenyl)(3,3,4,4,5,5,6,6,7,7,8,8,8-tridecafluorooctyl)silane (9b).**

**General Procedure A:** The product (95 mg, 66% yield) was purified by flash column chromatography on silica gel (PE) as a colorless oil. <sup>1</sup>H NMR (400 MHz, CDCl<sub>3</sub>)  $\delta$  7.57 – 7.48 (m, 2H), 7.44 – 7.38 (m, 3H), 2.13 – 1.92 (m, 2H), 1.06 – 0.96 (m, 2H), 0.35 (s, 6H). <sup>19</sup>F NMR (376 MHz, CDCl<sub>3</sub>)  $\delta$  -80.92 (t,  $J$  = 9.8 Hz, 3F), -115.7 – -116.5 (m, 2F), -121.9 – -122.3 (m, 2F), -122.9 – -123.2 (m, 2F), -123.2 – -123.5 (m, 2F), -126.2 – -126.4 (m, 2F). <sup>13</sup>C NMR (151 MHz, CDCl<sub>3</sub>)  $\delta$  137.3, 133.5, 129.4, 128.1, 118.4, 117.2, 111.3, 111.1, 110.3, 108.5, 25.9, 5.2, -3.5. IR (thin film)  $\nu_{\max}$  2922, 2112 cm<sup>-1</sup>. MS (EI)  $m/z$  (%) 482 (M)<sup>+</sup>, 467, 135 (100), 91. HRMS (FI) calculated for C<sub>16</sub>H<sub>15</sub>F<sub>13</sub>Si: 482.0730; Found: 482.0726 (M)<sup>+</sup>.

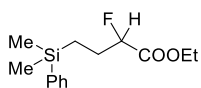

**Ethyl 4-(dimethyl(phenyl)silyl)-2-fluorobutanoate (9c). General Procedure A:**

The product (50 mg, 62% yield) was purified by flash column chromatography on silica gel (Petroleum ether: Ethyl acetate = 80:1) as a colorless oil. <sup>1</sup>H NMR (400 MHz, CDCl<sub>3</sub>)  $\delta$  7.55 – 7.44 (m, 2H), 7.41 – 7.31 (m, 3H), 4.95 – 4.74 (m, 1H), 4.24 (q,  $J$  = 7.1 Hz, 2H), 2.00 – 1.76 (m,

2H), 1.29 (t,  $J = 7.1$  Hz, 3H), 0.97 – 0.78 (m, 2H), 0.29 (s, 6H).  $^{19}\text{F}$  NMR (376 MHz,  $\text{CDCl}_3$ )  $\delta$  -192.5 (dt,  $J = 49.3, 24.4$  Hz, 1F).  $^{13}\text{C}$  NMR (101 MHz,  $\text{CDCl}_3$ )  $\delta$  169.8 (d,  $J = 24.5$  Hz), 138.2, 133.5, 129.1, 127.9, 90.4 (d,  $J = 185.5$  Hz), 61.3, 27.1 (d,  $J = 21.9$  Hz), 14.2, 9.8 (d,  $J = 1.7$  Hz), -3.3 (d,  $J = 4.7$  Hz). IR (thin film)  $\nu_{\text{max}}$  3069, 2955, 1739, 1427, 1374  $\text{cm}^{-1}$ . MS (EI)  $m/z$  (%) 268 ( $\text{M}^+$ ), 253, 135 (100), 77. HRMS (EI) calculated for  $\text{C}_{14}\text{H}_{21}\text{FO}_2\text{Si}$ : 268.1289; Found: 268.1294 ( $\text{M}^+$ ).

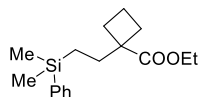

**Ethyl 1-(2-(dimethyl(phenyl)silyl)ethyl)cyclobutane-1-carboxylate (9d).**

**General Procedure A:** 3.5 equiv of alkene **5a** and 1.8 equiv of **6** were used. The product (57 mg, 65% yield) was purified by flash column chromatography on silica gel (Petroleum ether: Ethyl acetate = 50:1) as a colorless oil.  $^1\text{H}$  NMR (400 MHz,  $\text{CDCl}_3$ )  $\delta$  7.55 – 7.45 (m, 2H), 7.40 – 7.31 (m, 3H), 4.13 (q,  $J = 7.1$  Hz, 2H), 2.45 – 2.27 (m, 2H), 1.92 – 1.78 (m, 4H), 1.78 – 1.69 (m, 2H), 1.23 (t,  $J = 7.1$  Hz, 3H), 0.66 – 0.55 (m, 2H), 0.27 (s, 6H).  $^{13}\text{C}$  NMR (101 MHz,  $\text{CDCl}_3$ )  $\delta$  177.1, 139.0, 133.5, 128.9, 127.7, 60.1, 49.2, 32.1, 29.4, 15.3, 14.3, 10.2, -3.2. IR (thin film)  $\nu_{\text{max}}$  2927, 2854, 1727, 1445, 1366  $\text{cm}^{-1}$ . MS (EI)  $m/z$  (%) 290 ( $\text{M}^+$ ), 275, 247, 213, 135 (100), 105. HRMS (EI) calculated for  $\text{C}_{17}\text{H}_{26}\text{O}_2\text{Si}$ : 290.1697; Found: 290.1695 ( $\text{M}^+$ ).

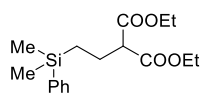

**Diethyl 2-(2-(dimethyl(phenyl)silyl)ethyl)malonate (9e). General Procedure A:**

3.5 equiv of alkene **5a** and 1.8 equiv of **6** were used. The product (39 mg, 40% yield) was purified by flash column chromatography on silica gel (Petroleum ether: Ethyl acetate = 40:1) as a colorless oil.  $^1\text{H}$  NMR (400 MHz,  $\text{CDCl}_3$ )  $\delta$  7.55 – 7.45 (m, 2H), 7.40 – 7.31 (m, 3H), 4.25 – 4.09 (m, 4H), 3.28 (t,  $J = 7.4$  Hz, 1H), 1.98 – 1.84 (m, 2H), 1.25 (t,  $J = 7.2$  Hz, 6H), 0.83 – 0.71 (m, 2H), 0.29 (s, 6H).  $^{13}\text{C}$  NMR (101 MHz,  $\text{CDCl}_3$ )  $\delta$  169.3, 138.5, 133.5, 129.0, 127.8, 61.2, 55.0, 23.5, 14.1, 13.5, -3.30. IR (thin film)  $\nu_{\text{max}}$  3049, 2957, 1732, 1446, 1369  $\text{cm}^{-1}$ . MS (EI)  $m/z$  (%) 322 ( $\text{M}^+$ ), 307, 245, 161, 135 (100), 105. HRMS (DART) calculated for  $\text{C}_{17}\text{H}_{30}\text{O}_4\text{NSi}$ : 340.1937; Found: 340.1931 ( $\text{M} + \text{NH}_4$ ) $^+$ .

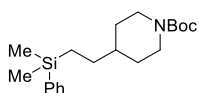

**tert-Butyl 4-(2-(dimethyl(phenyl)silyl)ethyl)piperidine-1-carboxylate (9f).**

**General Procedure A:** 3.5 equiv of alkene **5a** and 1.8 equiv of **6** were used. The product (62 mg, 60% yield) was purified by flash column chromatography on silica gel (Petroleum ether: Ethyl acetate = 25:1) as a colorless oil.  $^1\text{H}$  NMR (400 MHz,  $\text{CDCl}_3$ )  $\delta$  7.55 – 7.45 (m, 2H), 7.41 – 7.30 (m, 3H), 4.21 – 3.92 (m, 2H), 2.73 – 2.52 (m, 2H), 1.74 – 1.58 (m, 2H), 1.45 (s, 9H), 1.34 – 1.20 (m, 3H), 1.11 – 0.94 (m, 2H), 0.79 – 0.66 (m, 2H), 0.26 (s, 6H).  $^{13}\text{C}$  NMR (101 MHz,  $\text{CDCl}_3$ )  $\delta$  154.9, 139.3, 133.5, 128.8, 127.7, 79.1, 38.9, 31.8, 30.5, 28.5, 12.4, -3.2. IR (thin film)  $\nu_{\text{max}}$  2916, 2848, 1694, 1449, 1364  $\text{cm}^{-1}$ . MS (ESI)  $m/z$  (%) 370 ( $\text{M}+\text{Na}$ ) $^+$ , 348 ( $\text{M}+\text{H}$ ) $^+$ . HRMS (ESI) calculated for  $\text{C}_{20}\text{H}_{34}\text{NO}_2\text{Si}$ : 348.2356; Found: 348.2355 ( $\text{M}+\text{H}$ ) $^+$ .

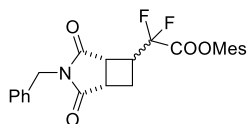

**Mesityl 2-(3-benzyl-2,4-dioxo-3-azabicyclo[3.2.0]heptan-6-yl)-2,2-difluoroacetate (10a).** **General Procedure B:** The product (64 mg, 50% yield,

dr > 20:1) was purified by flash column chromatography on silica gel (Petroleum ether: Ethyl acetate = 20:1) as a white solid (m.p. 92 – 94  $^{\circ}\text{C}$ ).  $^1\text{H}$  NMR (400 MHz,  $\text{CDCl}_3$ )  $\delta$  7.41 (d,  $J$  = 6.8 Hz, 2H), 7.36 – 7.28 (m, 3H), 6.90 (s, 2H), 4.72 (s, 2H), 3.58 – 3.51 (m, 1H), 3.40 – 3.32 (m, 1H), 3.28 – 3.13 (m, 1H), 2.91 – 2.80 (m, 1H), 2.44 – 2.34 (m, 1H), 2.28 (s, 3H), 2.11 (s, 6H).  $^{19}\text{F}$  NMR (376 MHz,  $\text{CDCl}_3$ )  $\delta$  -112.4 (dd,  $J$  = 267.7, 14.3 Hz, 1F), -115.2 (dd,  $J$  = 267.7, 17.3 Hz, 1F),  $^{13}\text{C}$  NMR (126 MHz,  $\text{CDCl}_3$ )  $\delta$  177.8, 176.1, 160.7 (t,  $J$  = 33.3 Hz), 144.7, 136.5, 135.5, 129.5, 129.0, 128.74, 128.72, 128.1, 114.9 (t,  $J$  = 252.9 Hz), 42.8, 39.26 (t,  $J$  = 25.2 Hz), 38.6 (dd,  $J$  = 5.9, 3.4 Hz), 36.1, 23.1 (dd,  $J$  = 6.3, 3.1 Hz), 20.7, 16.0. IR (thin film)  $\nu_{\text{max}}$  3068, 2921, 1772, 1703  $\text{cm}^{-1}$ . MS (ESI)  $m/z$  (%) 450 ( $\text{M}+\text{Na}$ ) $^+$ , 428 ( $\text{M}+\text{H}$ ) $^+$ . HRMS (ESI) calculated for  $\text{C}_{24}\text{H}_{23}\text{NO}_4\text{F}_2\text{Na}$ : 450.1487; Found: 450.1482 ( $\text{M}+\text{Na}$ ) $^+$ .

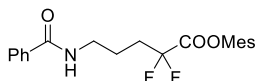

**Mesityl 5-benzamido-2,2-difluoropentanoate (10b).** **General Procedure B:**

The product (70 mg, 62% yield) was purified by flash column chromatography on silica gel (Petroleum ether: Ethyl acetate = 8:1) as a white solid (m.p. 96 – 98  $^{\circ}\text{C}$ ).  $^1\text{H}$  NMR (400 MHz,  $\text{CDCl}_3$ )  $\delta$  7.77 (d,  $J$  = 7.4 Hz, 2H), 7.48 (t,  $J$  = 7.4 Hz, 1H), 7.40 (t,  $J$  = 7.4 Hz, 2H), 6.88 (s, 2H), 6.72 – 6.58 (m, 1H), 3.55 (q,  $J$  = 6.7 Hz, 2H), 2.41 – 2.28 (m, 2H), 2.27 (s, 3H), 2.10 (s, 6H), 1.99 – 1.90 (m, 2H).  $^{19}\text{F}$  NMR (376 MHz,  $\text{CDCl}_3$ )  $\delta$  -105.0 (t,  $J$  = 17.1 Hz, 2F).  $^{13}\text{C}$  NMR (126 MHz,  $\text{CDCl}_3$ )

$\delta$  167.8, 162.1 (t,  $J = 33.6$  Hz), 144.8, 136.2, 134.2, 131.5, 129.5, 129.1, 128.5, 126.8, 116.2 (t,  $J = 251.2$  Hz), 39.1, 31.9 (t,  $J = 23.3$  Hz), 21.9 (t,  $J = 3.5$  Hz), 20.7, 15.9. IR (thin film)  $\nu_{\max}$  3256, 3071, 2924, 2863, 1770  $\text{cm}^{-1}$ . MS (ESI)  $m/z$  (%) 398 ( $M+\text{Na}$ )<sup>+</sup>, 376 ( $M+\text{H}$ )<sup>+</sup>. HRMS (ESI) calculated for  $\text{C}_{21}\text{H}_{23}\text{NO}_3\text{F}_2\text{Na}$ : 398.1538; Found: 398.1529 ( $M+\text{Na}$ )<sup>+</sup>.

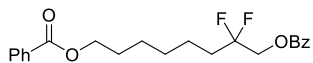

**2,2-Difluorooctane-1,8-diyl dibenzoate (10c). General Procedure B:**

The product (67 mg, 57% yield) was purified by flash column chromatography on silica gel (Petroleum ether: Ethyl acetate = 20:1) as a white solid (m.p. 48 – 50 °C).  $^1\text{H}$  NMR (400 MHz,  $\text{CDCl}_3$ )  $\delta$  8.05 (t,  $J = 8.8$  Hz, 4H), 7.62 – 7.52 (m, 2H), 7.49 – 7.39 (m, 4H), 4.49 (t,  $J = 12.4$  Hz, 2H), 4.32 (t,  $J = 6.6$  Hz, 2H), 2.07 – 1.92 (m, 2H), 1.82 – 1.74 (m, 2H), 1.64 – 1.55 (m, 2H), 1.53 – 1.40 (m, 4H).  $^{19}\text{F}$  NMR (376 MHz,  $\text{CDCl}_3$ )  $\delta$  -105.4 (tt,  $J = 16.9, 12.4$  Hz, 2F).  $^{13}\text{C}$  NMR (126 MHz,  $\text{CDCl}_3$ )  $\delta$  166.6, 165.5, 133.5, 132.8, 130.3, 129.8, 129.5, 129.1, 128.5, 128.3, 121.7 (t,  $J = 242.5$  Hz), 64.8, 64.1 (t,  $J = 34.1$  Hz), 33.9 (t,  $J = 23.8$  Hz), 28.9, 28.5, 25.8, 21.6 (t,  $J = 4.4$  Hz). IR (thin film)  $\nu_{\max}$  3064, 2866, 1723  $\text{cm}^{-1}$ . MS (EI)  $m/z$  (%) 390 ( $M$ )<sup>+</sup>, 248, 105 (100), 77. HRMS (FI) calculated for  $\text{C}_{22}\text{H}_{24}\text{O}_4\text{F}_2$ : 390.1637; Found: 390.1642 ( $M$ )<sup>+</sup>.

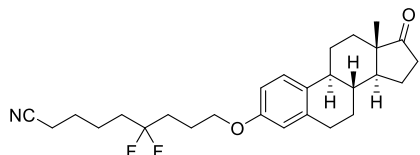

**6,6-Difluoro-9-(((8R,9S,13S,14S)-13-methyl-17-oxo-7,8,9,11,12,13,14,15,16,17-decahydro-6H-cyclopenta[a]phenanthren-3-yl)oxy)nonanenitrile (10d).**

**General Procedure B:** The product (55 mg, 41% yield) was purified by flash column chromatography on silica gel (Petroleum ether: Ethyl acetate = 4:1) as a colorless oil.  $^1\text{H}$  NMR (400 MHz,  $\text{CDCl}_3$ )  $\delta$  7.20 (d,  $J = 8.5$  Hz, 1H), 6.70 (dd,  $J = 8.5, 2.3$  Hz, 1H), 6.64 (d,  $J = 2.3$  Hz, 1H), 3.97 (t,  $J = 5.8$  Hz, 2H), 2.94 – 2.84 (m, 2H), 2.55 – 2.45 (m, 1H), 2.38 (t,  $J = 7.0$  Hz, 3H), 2.29 – 2.20 (m, 1H), 2.18 – 1.82 (m, 10H), 1.76 – 1.38 (m, 10H), 0.91 (s, 3H).  $^{19}\text{F}$  NMR (376 MHz,  $\text{CDCl}_3$ )  $\delta$  -98.9 – -99.2 (m, 2F).  $^{13}\text{C}$  NMR (126 MHz,  $\text{CDCl}_3$ )  $\delta$  220.9, 156.7, 137.8, 132.2, 126.3, 124.5 (t,  $J = 241.3$  Hz), 119.3, 114.5, 112.0, 66.9, 50.3, 47.9, 43.9, 38.3, 35.8, 35.7 (t,  $J = 25.8$  Hz), 33.20 (t,  $J = 25.7$  Hz), 31.5, 29.6, 26.5, 25.9, 25.1, 22.3 (t,  $J = 4.3$  Hz), 21.53, 21.51 (t,  $J = 5.0$  Hz), 17.0, 13.8. IR (thin film)  $\nu_{\max}$  2929,

2868, 2246, 1737  $\text{cm}^{-1}$ . MS (DART)  $m/z$  (%) 444 ( $\text{M}+\text{H}$ )<sup>+</sup>. HRMS (DART) calculated for  $\text{C}_{27}\text{H}_{36}\text{NO}_2\text{F}_2$ : 444.2709; Found: 444.2706 ( $\text{M}+\text{H}$ )<sup>+</sup>.

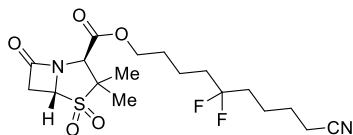

**9-Cyano-5,5-difluorononyl (2S,5R)-3,3-dimethyl-7-oxo-4-thia-1-azabicyclo[3.2.0]heptane-2-carboxylate 4,4-dioxide (10e). General**

**Procedure B:** The product (60 mg, 48% yield) was purified by flash column chromatography on silica gel (Petroleum ether: Ethyl acetate = 2:1) as a white solid.  $^1\text{H}$  NMR (500 MHz,  $\text{CDCl}_3$ )  $\delta$  4.61 (dd,  $J$  = 4.2, 19 Hz, 1H), 4.38 (s, 1H), 4.28 – 4.15 (m, 2H), 3.49 (dd,  $J$  = 16.2, 4.2 Hz, 1H), 3.44 (dd,  $J$  = 16.2, 1.9 Hz, 1H), 2.38 (t,  $J$  = 6.8 Hz, 2H), 1.93 – 1.80 (m, 4H), 1.78 – 1.69 (m, 4H), 1.68 – 1.62 (m, 2H), 1.61 (s, 3H), 1.60 – 1.54 (m, 2H), 1.41 (s, 3H).  $^{19}\text{F}$  NMR (376 MHz,  $\text{CDCl}_3$ )  $\delta$  -98.6 – -99.7 (m, 2F).  $^{13}\text{C}$  NMR (126 MHz,  $\text{CDCl}_3$ )  $\delta$  170.7, 166.9, 124.3 (t,  $J$  = 240.9 Hz), 119.3, 65.9, 63.2, 62.6, 61.0, 38.3, 35.8 (t,  $J$  = 25.6 Hz), 35.6 (t,  $J$  = 25.7 Hz), 28.1, 25.0, 21.5 (t,  $J$  = 4.6 Hz), 20.3, 18.6 (t,  $J$  = 4.6 Hz), 18.5, 17.1. IR (thin film)  $\nu_{\text{max}}$  2875, 2246, 1797, 1754  $\text{cm}^{-1}$ . MS (ESI)  $m/z$  (%) 443 ( $\text{M}+\text{Na}$ )<sup>+</sup>, 421 ( $\text{M}+\text{H}$ )<sup>+</sup>. HRMS (ESI) calculated for  $\text{C}_{18}\text{H}_{26}\text{N}_2\text{O}_5\text{F}_2\text{NaS}$ : 443.1422; Found: 443.1419 ( $\text{M}+\text{Na}$ )<sup>+</sup>.

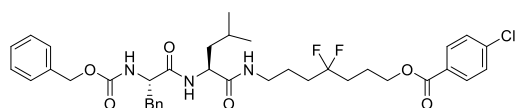

**(5S,8S)-5-Benzyl-14,14-difluoro-8-isobutyl-3,6,9-trioxo-1-phenyl-2-oxa-4,7,10-triazaheptadecan-17-yl 4-chlorobenzoate (10f). General Procedure B:** The product

(107 mg, 51% yield) was purified by flash column chromatography on silica gel (Petroleum ether: Ethyl acetate = 2:1) as a colorless oil.  $^1\text{H}$  NMR (500 MHz,  $\text{CDCl}_3$ )  $\delta$  7.96 (d,  $J$  = 8.5 Hz, 2H), 7.41 (d,  $J$  = 8.5 Hz, 2H), 7.37 – 7.31 (m, 3H), 7.31 – 7.23 (m, 5H), 7.16 (d,  $J$  = 7.0 Hz, 2H), 6.42 – 6.31 (m, 1H), 6.24 (d,  $J$  = 8.0 Hz, 1H), 5.23 (d,  $J$  = 6.0 Hz, 1H), 5.08 (d,  $J$  = 12.3 Hz, 1H), 5.05 (d,  $J$  = 12.3 Hz, 1H), 4.45 – 4.35 (m, 2H), 4.34 (t,  $J$  = 5.8 Hz, 2H), 3.30 – 3.13 (m, 2H), 3.08 (d,  $J$  = 6.5 Hz, 2H), 2.04 – 1.92 (m, 4H), 1.91 – 1.80 (m, 2H), 1.72 – 1.64 (m, 3H), 1.51 – 1.34 (m, 2H), 0.88 (d,  $J$  = 2.5 Hz, 3H), 0.86 (d,  $J$  = 2.6 Hz, 3H).  $^{19}\text{F}$  NMR (376 MHz,  $\text{CDCl}_3$ )  $\delta$  -98.7 – -99.4 (m, 2F).  $^{13}\text{C}$  NMR (126 MHz,  $\text{CDCl}_3$ )  $\delta$  171.5, 171.0, 165.7, 156.4, 139.5, 135.8, 131.0, 129.2, 128.9, 128.8, 128.6, 128.5, 128.5, 128.1, 127.4, 124.5 (t,  $J$  = 241.0 Hz), 67.4, 64.4, 56.5, 51.9, 40.4, 38.9, 33.8 (t,  $J$  = 25.6 Hz), 33.2 (t,  $J$  = 26.0 Hz), 29.7, 24.7, 22.9, 22.4 (t,  $J$  = 4.0 Hz), 21.8 (t,  $J$  = 4.4 Hz), 21.7. IR (thin film)  $\nu_{\text{max}}$

3293, 3064, 2851, 1721, 1645  $\text{cm}^{-1}$ . MS (ESI)  $m/z$  (%) 722 ( $\text{M}+\text{Na}$ )<sup>+</sup>, 700 ( $\text{M}+\text{H}$ )<sup>+</sup>,. HRMS (ESI) calculated for  $\text{C}_{37}\text{H}_{44}\text{N}_3\text{O}_6\text{F}_2\text{NaCl}$ : 722.2778; Found: 722.2769 ( $\text{M}+\text{Na}$ )<sup>+</sup>.

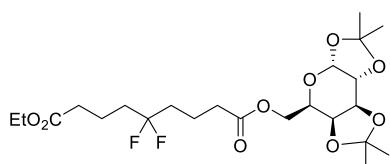

**1-Ethyl**

**9-(((3aR,5R,5aS,8aS,8bR)-2,2,7,7-**

**tetramethyltetrahydro-5H-bis([1,3]dioxolo)[4,5-b:4',5'-d]pyran-5-yl)methyl) 5,5-difluorononanedioate (10g). General Procedure**

**B:** The product (76 mg, 51% yield) was purified by flash column chromatography on silica gel (Petroleum ether: Ethyl acetate = 4:1) as a colorless oil.  $^1\text{H}$  NMR (400 MHz,  $\text{CDCl}_3$ )  $\delta$  5.52 (d,  $J$  = 5.2 Hz, 1H), 4.64 – 4.57 (m, 1H), 4.36 – 4.26 (m, 2H), 4.25 – 4.07 (m, 4H), 4.05 – 3.97 (m, 1H), 2.40 (t,  $J$  = 7.0 Hz, 2H), 2.34 (t,  $J$  = 6.8 Hz, 2H), 1.94 – 1.74 (m, 8H), 1.49 (s, 3H), 1.44 (s, 3H), 1.31 (s, 3H), 1.32 (s, 3H), 1.24 (t,  $J$  = 7.2 Hz, 3H).  $^{19}\text{F}$  NMR (376 MHz,  $\text{CDCl}_3$ )  $\delta$  -98.6 – -98.9 (m, 2F).  $^{13}\text{C}$  NMR (126 MHz,  $\text{CDCl}_3$ )  $\delta$  172.9, 172.8, 124.5 (t,  $J$  = 241.4 Hz), 109.6, 108.7, 96.3, 71.0, 70.7, 70.4, 65.9, 63.4, 60.4, 35.51 (t,  $J$  = 25.4 Hz), 35.48 (t,  $J$  = 25.4 Hz), 33.6, 33.5, 25.92, 25.90, 24.9, 24.4, 17.8, 17.7, 14.2. IR (thin film)  $\nu_{\text{max}}$  2982, 2935, 1735, 1456  $\text{cm}^{-1}$ . MS (DART)  $m/z$  (%) 495 ( $\text{M}+\text{H}$ )<sup>+</sup>. HRMS (DART) calculated for  $\text{C}_{23}\text{H}_{37}\text{O}_9\text{F}_2$ : 495.2400; Found: 495.2396 ( $\text{M}+\text{H}$ )<sup>+</sup>.

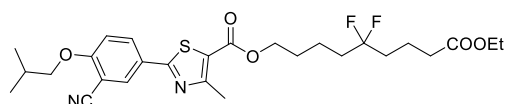

**9-Ethoxy-5,5-difluoro-9-oxononyl**

**2-(3-cyano-4-**

**isobutoxyphenyl)-4-methylthiazole-5-carboxylate (10h).**

**General Procedure B:** The product (72 mg, 45% yield) was purified by flash column chromatography on silica gel (Petroleum ether: Ethyl acetate = 4:1) as a white solid (m.p. 46 – 48 °C).  $^1\text{H}$  NMR (400 MHz,  $\text{CDCl}_3$ )  $\delta$  8.16 (d,  $J$  = 2.0 Hz, 1H), 8.07 (dd,  $J$  = 8.8 Hz, 1H), 7.00 (d,  $J$  = 8.8, 2.0 Hz, 1H), 4.30 (t,  $J$  = 6.4 Hz, 2H), 4.11 (q,  $J$  = 7.2 Hz, 2H), 3.88 (d,  $J$  = 6.4 Hz, 2H), 2.74 (s, 3H), 2.35 (t,  $J$  = 6.8 Hz, 2H), 2.24 – 2.13 (m, 1H), 1.96 – 1.75 (m, 8H), 1.67 – 1.57 (m, 2H), 1.24 (t,  $J$  = 7.2 Hz, 3H), 1.08 (s, 3H), 1.07 (s, 3H).  $^{19}\text{F}$  NMR (376 MHz,  $\text{CDCl}_3$ )  $\delta$  -98.5 – -98.8 (m, 2F).  $^{13}\text{C}$  NMR (126 MHz,  $\text{CDCl}_3$ )  $\delta$  172.9, 167.2, 162.4, 161.9, 161.2, 132.5, 132.0, 125.9, 124.6 (t,  $J$  = 241.0 Hz), 121.6, 115.3, 112.6, 102.9, 75.6, 64.8, 60.4, 35.8 (t,  $J$  = 25.6 Hz), 35.6 (t,  $J$  = 25.8 Hz), 33.5, 28.3, 28.1, 19.0, 18.8 (t,  $J$  = 4.5 Hz), 17.8 (t,  $J$  = 4.9 Hz), 17.4, 14.2. IR (thin film)  $\nu_{\text{max}}$  2961, 2228, 1733, 1712  $\text{cm}^{-1}$ . MS (ESI)  $m/z$  (%) 559 ( $\text{M}+\text{Na}$ )<sup>+</sup>, 537 ( $\text{M}+\text{H}$ )<sup>+</sup>. HRMS (ESI) calculated for  $\text{C}_{27}\text{H}_{35}\text{N}_2\text{O}_5\text{F}_2\text{S}$ : 537.2229; Found:

537.2218 (M+H)<sup>+</sup>.

## 6. Transformations of Compounds 3

### Synthesis of compounds 11d, 11h, and 11l.<sup>17</sup>

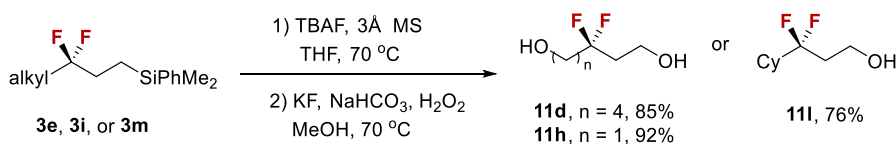

**General Procedure:** To a 25 mL of Schlenk tube were added TBAF (1.0 mL, 1.0 mmol, 10 equiv, 1M in THF), 3Å molecular sieve (200 mg, 0.2g/mmol). The reaction mixture was stirred at room temperature for 15 min. Subsequently, a solution of compound **3** (0.1 mmol, 1.0 equiv) in THF (1.0 mL) was added. The reaction mixture was stirred at 70 °C for 1.5 h. The reaction mixture was allowed to cool down to room temperature and then KF (20 mg, 0.35 mmol, 3.5 equiv), NaHCO<sub>3</sub> (19 mg, 0.23 mmol, 2.3 equiv), MeOH (1.0 mL, 10 mL/ mL THF) and H<sub>2</sub>O<sub>2</sub> (0.35 mL, 30% in H<sub>2</sub>O) were added. The reaction mixture was stirred at at 70 °C for overnight. The reaction mixture was poured into Na<sub>2</sub>SO<sub>3</sub> aqueous (50 mL) and extracted with EA (30 mL× 2). The combined organic solution was washed by brine, dried over anhydrous sodium sulfate, filtered, and concentrated. The product was isolated by flash column chromatography.

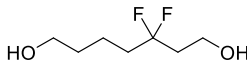 **3,3-Difluoroheptane-1,7-diol (11d).** The product (14 mg, 85% yield) was purified by flash column chromatography on silica gel (Petroleum ether: Ethyl acetate = 2:5) as a colorless oil. <sup>1</sup>H NMR (400 MHz, CDCl<sub>3</sub>) δ 3.85 (t, *J* = 5.6 Hz, 2H), 3.66 (t, *J* = 5.6 Hz, 2H), 2.21 – 2.04 (m, 2H), 2.02 – 1.82 (m, 3H), 1.71 (s, 1H), 1.66 – 1.51 (m, 4H). <sup>19</sup>F NMR (376 MHz, CDCl<sub>3</sub>) δ -96.7 – -97.0 (m, 2F). <sup>13</sup>C NMR (101 MHz, CDCl<sub>3</sub>) δ 125.0 (t, *J* = 241.6 Hz), 62.3, 57.1 (t, *J* = 5.6 Hz), 38.9 (t, *J* = 24.5 Hz), 36.6 (t, *J* = 25.1 Hz), 32.1, 18.6 (t, *J* = 4.9 Hz). IR (thin film) ν<sub>max</sub> 3354, 2940, 1462, 1389 cm<sup>-1</sup>. MS (DART) *m/z* (%) 169 (M+H)<sup>+</sup>, 118, 100, 60 (100), 55. HRMS (DART) calculated for C<sub>7</sub>H<sub>15</sub>F<sub>2</sub>O<sub>2</sub>: 169.1035; Found: 169.1035 (M+H)<sup>+</sup>.

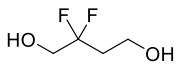 **2,2-Difluorobutane-1,4-diol (11h).** The product (12 mg, 92% yield) was purified by flash column chromatography on silica gel (Petroleum ether: Ethyl acetate = 2:5) as a

colorless oil.  $^1\text{H}$  NMR (400 MHz,  $\text{CDCl}_3$ )  $\delta$  3.91 – 3.86 (m, 2H), 3.81 (t,  $J$  = 12.6 Hz, 2H), 2.31 – 2.15 (m, 2H).  $^{19}\text{F}$  NMR (376 MHz,  $\text{CDCl}_3$ )  $\delta$  -104.9 – -105.2 (m, 2F).  $^{13}\text{C}$  NMR (126 MHz,  $\text{CDCl}_3$ )  $\delta$  122.9 (t,  $J$  = 243.1 Hz), 64.3 (t,  $J$  = 33.4 Hz), 56.8 (t,  $J$  = 6.6 Hz), 36.9 (t,  $J$  = 24.6 Hz). IR (thin film)  $\nu_{\text{max}}$  3370, 2926, 2852, 1427  $\text{cm}^{-1}$ . MS (EI)  $m/z$  (%) 107, 88, 78 (100), 75. HRMS (FI) calculated for  $\text{C}_4\text{H}_8\text{F}_2\text{O}_2$ : 126.0487; Found: 126.0490 ( $\text{M}$ ) $^+$ .

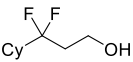 **3-Cyclohexyl-3,3-difluoropropan-1-ol (11l).** The product (14 mg, 76% yield) was purified by flash column chromatography on silica gel (Petroleum ether: Ethyl acetate = 2:1) as a colorless oil.  $^1\text{H}$  NMR (400 MHz,  $\text{CDCl}_3$ )  $\delta$  3.89 (t,  $J$  = 6.0 Hz, 2H), 2.19 – 2.01 (m, 2H), 1.90 – 1.65 (m, 6H), 1.31 – 1.07 (m, 5H).  $^{19}\text{F}$  NMR (376 MHz,  $\text{CDCl}_3$ )  $\delta$  -104.4 – -104.7 (m, 2F).  $^{13}\text{C}$  NMR (126 MHz,  $\text{CDCl}_3$ )  $\delta$  126.3 (t,  $J$  = 243 Hz), 57.1 (t,  $J$  = 5.3 Hz), 44.5 (t,  $J$  = 23.4 Hz), 36.4 (t,  $J$  = 24.5 Hz), 25.9, 25.8 (t,  $J$  = 4.6 Hz), 25.6. IR (thin film)  $\nu_{\text{max}}$  3446, 2924, 2853, 1457, 1377  $\text{cm}^{-1}$ . MS (EI)  $m/z$  (%) 149, 95, 55 (100). HRMS (DART) calculated for  $\text{C}_9\text{H}_{20}\text{F}_2\text{ON}$ : 196.1507; Found: 196.1507 ( $\text{M}+\text{NH}_4$ ) $^+$ .

### Gram-scale synthesis of 3p

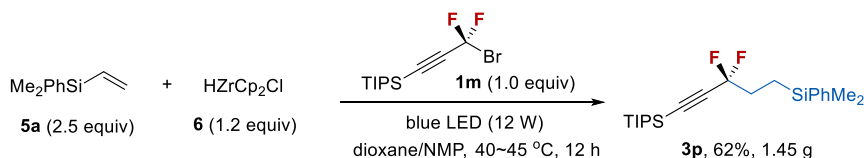

**Procedure:** To a 10 mL of Schlenk tube was added  $\text{ZrCp}_2\text{HCl}$  (1.2 equiv, 7.2 mmol) in the glovebox. The tube was then taken out of the glovebox, and was evacuated and backfilled with Ar (3 times). Alkene **5a** (2.5 equiv, 15 mmol) and anhydrous dioxane (20 mL) were added under Ar. The resulting mixture was stirred at room temperature for 1 h until a clear yellow solution was obtained. To another 350 mL of Schlenk tube were added difluoroalkyl halide **1m** (6 mmol, 1.0 equiv) and NMP (60 mL) under Ar. The prepared solution of alkylzirconocene and alkene was then added to the reaction mixture via a syringe for 10 min under Ar. The reaction mixture was stirred at 40~45  $^{\circ}\text{C}$  under irradiation of a 12 W blue LEDs strip for 12 h. The reaction mixture was then cooled to room temperature. The reaction mixture was poured into water (200 mL) and extracted with EA (150 mL $\times$  2). The combined organic layers were washed by brine, dried over anhydrous sodium sulfate, filtered, and concentrated. The



product was purified with flash column chromatography (Petroleum ether) to give compound **3p** (1.45 g, 62% yield) as a colorless oil.

### Synthesis of compound 12.

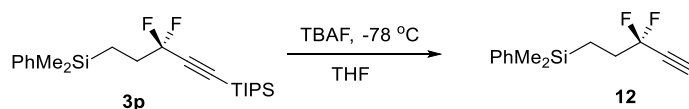

**(3,3-Difluoropent-4-yn-1-yl)dimethyl(phenyl)silane (12):** To a solution of **3p** (400 mg, 1.0 mmol, 1.0 equiv) in THF (5.0 mL) was added TBAF (1.2 mL, 1.2 equiv, 1.0 M in THF) at -78 °C. The reaction mixture was stirred for 1 h, and was quenched with saturated aq.  $\text{NH}_4\text{Cl}$ . The resulting mixture was extracted with ethyl acetate. The combined organic layers were dried with  $\text{Na}_2\text{SO}_4$  and concentrated. The residue was purified by flash column chromatography (Petroleum ether: Ethyl acetate = 100:1) to give compound **12** (202 mg, 85% yield) as a colorless oil.  $^1\text{H}$  NMR (400 MHz,  $\text{CDCl}_3$ )  $\delta$  7.68 – 7.47 (m, 2H), 7.45 – 7.32 (m, 3H), 2.74 (t,  $J$  = 4.6 Hz, 1H), 2.09 – 1.91 (m, 2H), 1.09 – 0.93 (m, 2H), 0.33 (s, 6H).  $^{19}\text{F}$  NMR (376 MHz,  $\text{CDCl}_3$ )  $\delta$  -86.0 (td,  $J$  = 14.4, 4.6 Hz, 2F).  $^{13}\text{C}$  NMR (126 MHz,  $\text{CDCl}_3$ )  $\delta$  137.8, 133.5, 129.2, 127.9, 115.1 (t,  $J$  = 233.4 Hz), 76.5 (t,  $J$  = 41.2 Hz), 75.1 (t,  $J$  = 6.8 Hz), 34.0 (t,  $J$  = 26.9 Hz), 8.2, -3.4. IR (thin film)  $\nu_{\text{max}}$  3303, 2924, 2856, 2133, 1448  $\text{cm}^{-1}$ . MS (EI)  $m/z$  (%) 238 ( $\text{M}^+$ ), 154, 135 (100), 91. HRMS (EI) calculated for  $\text{C}_{13}\text{H}_{16}\text{F}_2\text{Si}$ : 238.0984; Found: 238.0986 ( $\text{M}^+$ ).

### Synthesis of compound 13.

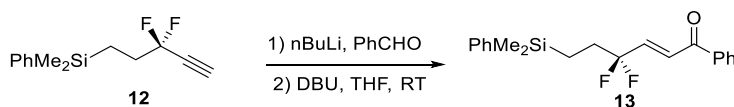

**(E)-6-(Dimethyl(phenyl)silyl)-4,4-difluoro-1-phenylhex-2-en-1-one (13):** To a solution of compound **12** (200 mg, 0.84 mmol, 1.0 equiv) in THF (3 mL) was added *n*-BuLi (1.0 mmol, 1.2 equiv) at -78 °C under Ar. After the mixture was stirred for 1 h at -78 °C, benzaldehyde (133 mg, 1.26 mmol, 1.5 equiv) in THF (1.0 mL) was slowly added. The reaction was warmed to room temperature and stirred for another 8 h. The reaction mixture was concentrated and the residue was redissolved in THF (4 mL), DBU (255 mg, 1.68 mmol, 2.0 equiv) was then added. The resulting mixture was stirred at room temperature overnight. The reaction was quenched with saturated aqueous  $\text{NH}_4\text{Cl}$  and extracted

with CH<sub>2</sub>Cl<sub>2</sub>. The combined organic layers were washed with water, dried over Na<sub>2</sub>SO<sub>4</sub>, filtered and concentrated. The residue was purified with silica gel chromatography (Petroleum ether: Ethyl acetate = 40:1) to give compound **13** (150 mg, 52%) as a colorless oil. <sup>1</sup>H NMR (500 MHz, CDCl<sub>3</sub>) δ 8.00 – 7.94 (m, 2H), 7.62 (t, *J* = 7.4 Hz, 1H), 7.53 – 7.48 (m, 4H), 7.40 – 7.35 (m, 3H), 7.31 (dt, *J* = 15.5, 1.9 Hz, 1H), 6.85 (dt, *J* = 15.5, 11.6 Hz, 1H), 2.02 – 1.87 (m, 2H), 0.97 – 0.87 (m, 2H), 0.31 (s, 6H). <sup>19</sup>F NMR (376 MHz, CDCl<sub>3</sub>) δ -99.9 – -100.4 (m, 2F). <sup>13</sup>C NMR (126 MHz, CDCl<sub>3</sub>) δ 189.3, 138.7 (t, *J* = 27.3 Hz), 137.7, 136.8, 133.6, 133.5, 129.2, 128.8, 128.7, 127.9, 127.6 (t, *J* = 7.3 Hz), 121.6 (t, *J* = 240.3 Hz), 32.0 (t, *J* = 27.3 Hz), 7.7 (t, *J* = 2.5 Hz), -3.4. IR (thin film) ν<sub>max</sub> 2928, 2899, 1427 cm<sup>-1</sup>. MS (EI) *m/z* (%) 201, 135 (100), 77. HRMS (EI) calculated for C<sub>20</sub>H<sub>22</sub>F<sub>2</sub>OSi: 344.1402; Found: 344.1398 (M)<sup>+</sup>.

#### Synthesis of compound **14**.<sup>18</sup>

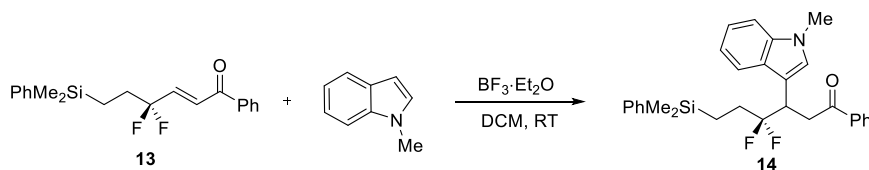

To a solution of compound **13** (100 mg, 0.3 mmol, 1.0 equiv) in DCM (2 mL) was added BF<sub>3</sub>·Et<sub>2</sub>O (8.4 mg, 0.06 mmol, 0.2 equiv) at room temperature. After the reaction mixture was stirred for 0.5 h, the 1-methyl-1*H*-indole (78 mg, 0.6 mmol, 2.0 equiv) in DCM (1.0 mL) was added. The mixture was stirred at room temperature until **13** was disappeared. The reaction was then quenched with saturated aqueous NaHCO<sub>3</sub> and extracted with CH<sub>2</sub>Cl<sub>2</sub>. The combined organic layers were dried over Na<sub>2</sub>SO<sub>4</sub>, filtered and concentrated. The residue was purified with silica gel chromatography (Petroleum ether: Ethyl acetate = 40:1) to give compound **14** (100 mg, 70%) as a colorless oil. <sup>1</sup>H NMR (400 MHz, CDCl<sub>3</sub>) δ 7.92 (d, *J* = 7.2 Hz, 2H), 7.80 (d, *J* = 7.6 Hz, 1H), 7.51 (t, *J* = 6.8 Hz, 1H), 7.40 (t, *J* = 7.2 Hz, 2H), 7.36 – 7.21 (m, 7H), 7.20 – 7.14 (m, 1H), 6.99 (s, 1H), 4.55 – 4.28 (m, 1H), 3.86 – 3.74 (m, 1H), 3.68 (s, 3H), 3.56 (dd, *J* = 17.2, 8.3 Hz, 1H), 1.94 – 1.65 (m, 2H), 1.08 – 0.86 (m, 2H), 0.16 (s, 6H). <sup>19</sup>F NMR (376 MHz, CDCl<sub>3</sub>) δ -102.5 (dtd, *J* = 236.4, 19.5, 6.2 Hz, 1F), -103.3 – -104.5 (m, 1F). <sup>13</sup>C NMR (126 MHz, CDCl<sub>3</sub>) δ 197.8, 138.1, 136.9, 136.7, 133.4, 132.9, 128.8, 128.4, 128.0, 127.78, 127.7, 127.1, 126.8 (t, *J* = 246.7 Hz), 121.6, 119.6 (d, *J* = 2.6 Hz), 119.3, 111.3 (d, *J* = 8.9 Hz), 109.2, 38.7, 37.4 (t, *J* = 25.2 Hz), 32.6, 29.7 (t, *J* = 26.2 Hz), 7.6, -3.2, -3.6. IR (thin film) ν<sub>max</sub> 2954, 2928,

1688 cm<sup>-1</sup>. MS (ESI) m/z (%) 476 (M+H)<sup>+</sup>. HRMS (ESI) calculated for C<sub>29</sub>H<sub>32</sub>NOF<sub>2</sub>Si: 476.2216; Found: 476.2211 (M+H)<sup>+</sup>.

### Synthesis of compound 15.<sup>19</sup>

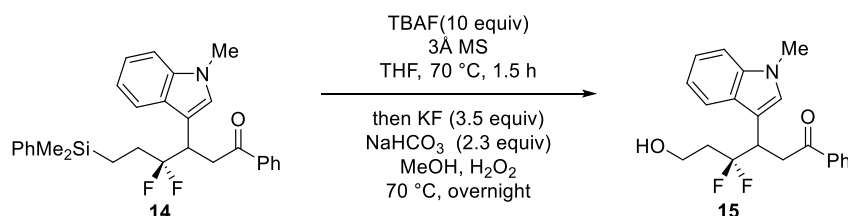

**4,4-Difluoro-6-hydroxy-3-(1-methyl-1H-indol-3-yl)-1-phenylhexan-1-one (15).** Compound **15** was prepared according to the procedure of synthesis of compound **11d**. The product **15** (20 mg, 56% yield, 0.1 mmol scale) was purified with silica gel chromatography (Petroleum ether: Ethyl acetate = 3:1) as a white solid (m.p. 121–123 °C). <sup>1</sup>H NMR (400 MHz, CDCl<sub>3</sub>) δ 8.03 (d, *J* = 6.0 Hz, 2H), 7.88 (d, *J* = 6.8 Hz, 1H), 7.72 – 7.60 (m, 1H), 7.58 – 7.48 (m, 2H), 7.44 – 7.32 (m, 2H), 7.30 – 7.23 (m, 1H), 7.16 (s, 1H), 4.60 – 4.35 (m, 1H), 4.03 – 3.80 (m, 6H), 3.69 (dd, *J* = 17.0, 7.9 Hz, 1H), 2.39 – 2.07 (m, 2H), 1.78 (s, 1H). <sup>19</sup>F NMR (376 MHz, CDCl<sub>3</sub>) δ -97.8 – -101.0 (m, 1F), -103.3 – 104.5 (m, 1F). <sup>13</sup>C NMR (126 MHz, CDCl<sub>3</sub>) δ 197.6, 136.8 (d, *J* = 1.5 Hz), 133.0, 128.5, 128.0, 127.1, 126.2 (t, *J* = 246.3 Hz), 121.8, 119.5 (d, *J* = 3.5 Hz), 119.5, 111.0 (d, *J* = 9.2 Hz), 109.3, 57.0 (t, *J* = 5.0 Hz), 39.0 (t, *J* = 24.6 Hz), 38.4 (t, *J* = 2.5 Hz), 37.9 (t, *J* = 23.6 Hz), 32.8. IR (thin film) ν<sub>max</sub> 3387, 2933, 1683 cm<sup>-1</sup>. MS (ESI) m/z (%) 380 (M+Na)<sup>+</sup>. HRMS (ESI) calculated for C<sub>21</sub>H<sub>21</sub>NF<sub>2</sub>O<sub>2</sub>Na: 380.1432; Found: 380.1432 (M+Na)<sup>+</sup>.

## 7. References

- (1) Zhao, H.-Y.; Zhou, M.; Zhang, X. Palladium-Catalyzed Carbonylative Cross-Coupling of Difluoroalkyl Halides with Alkylboranes under 1 Atm of CO. *Org. Lett.* **2021**, 23, 9106-9111.
- (2) Kostromitin, V. S.; Zemtsov, A. A.; Kokorekin, V. A.; Levin, V. V.; Dilman, A. D. Atom-Transfer Radical Addition of Fluoroalkyl Bromides to Alkenes via a Photoredox/Copper Catalytic System. *Chem. Commun.* **2021**, 57, 5219-5222.
- (3) Wang, L.; Wei, X.-J.; Jia, W.-L.; Zhong, J.-J.; Wu, L.-Z.; Liu, Q. Visible-Light-Driven

Difluoroacetamidation of Unactive Arenes and Heteroarenes by Direct C–H Functionalization at Room Temperature. *Org. Lett.* **2014**, *16*, 5842-5845.

(4) Hammond, G. B. Nucleophilic and Electrophilic Substitutions of Difluoropropargyl Bromides. *J. Fluorine Chem.* **2006**, *127*, 476-488.

(5) Xu, C.; Yang, Z.-F.; An, L.; Zhang, X. Nickel-Catalyzed Difluoroalkylation-Alkylation of Enamides. *ACS Catal.* **2019**, *9*, 8224-8229.

(6) Xia, P.-J.; Ye, Z.-P.; Song, D.; Ren, J.-W.; Wu, H.-W.; Xiao, J.-A.; Xiang, H.-Y.; Chen, X.-Q.; Yang, H. Photocatalytic Reductive Radical-Radical Coupling of *N,N'*-Cyclicazomethine Imines with Difluorobromo Derivatives. *Chem. Commun.* **2019**, *55*, 2712-2715.

(7) Douglas, J. J.; Albright, H.; Sevrin, M. J.; Cole, K. P.; Stephenson, C. R. J. A Visible-Light-Mediated Radical Smiles Rearrangement and its Application to the Synthesis of a Difluoro-Substituted Spirocyclic ORL-1 Antagonist. *Angew. Chem. Int. Ed.*, **2015**, *54*, 14898 -14902.

(8) Lin, Q.-Y.; Xu, X. H.; Qing, F. L. Visible Light-Induced Selective Hydrobromodifluoromethylation of Alkenes with Dibromodifluoromethane. *Org. Biomol. Chem.* **2015**, *13*, 8740-8749.

(9) Ambler, B. R.; Zhu, L.; Altman, R. A. Copper-Catalyzed Synthesis of Trifluoroethylarenes from Benzylic Bromodifluoroacetates. *J. Org. Chem.* **2015**, *80*, 8449-8457.

(10) Goetzke, F. W.; Hell, A. M. L.; Dijk, L.; Fletcher, S. P. A Catalytic Asymmetric Cross-Coupling Approach to the Synthesis of Cyclobutanes. *Nat. Chem.* **2021**, *13*, 880-886.

(11) Zhou, M.; Zhao, H.-Y.; Zhang, S.; Zhang, Y.; Zhang, X. Nickel-Catalyzed Four-Component Carbocarbonylation of Alkenes under 1 Atm of CO. *J. Am. Chem. Soc.* **2020**, *142*, 18191-18199.

(12) Li, X.; He, S.; Song, Q. Diethylzinc-Mediated Radical 1,2-Addition of Alkenes and Alkynes. *Org. Lett.* **2021**, *23*, 2994-2999.

(13) Fujihara, T.; Semba, K.; Terao, J.; Tsuji, Y. Copper-Catalyzed Hydrosilylation with a Bowl-Shaped Phosphane Ligand: Preferential Reduction of a Bulky Ketone in the Presence of an Aldehyde. *Angew. Chem., Int. Ed.* **2010**, *49*, 1472-1476.

(14) Loesche, A.; Kahnt, M.; Serbian, I.; Brandt, W.; Csuk, R. Triterpene-Based Carboxamides Act as Good Inhibitors of Butyrylcholinesterase. *Molecules*. **2019**, *24*, 948-964.

- (15) Zhang, X.; McNally, A. Cobalt-catalyzed Alkylation of Drug-Like Molecules and Pharmaceuticals using Heterocyclic Phosphonium Salts. *ACS Catal.* **2019**, *9*, 4862-4866.
- (16) Prince, R. J.; Gao, F.; Pazienza, J. E.; Marx, I. E.; Schulz, J.; Hopkins, B. T. Utilization of Cyclic Amides as Masked Aldehyde Equivalents in Reductive Amination Reactions. *J. Org. Chem.* **2019**, *84*, 7936-7949.
- (17) Nelson, B.; Hiller, W.; Pollex, A.; Hiersemann, M. Palladium (II)-Catalyzed Cycloisomerization of Functionalized 1,5-Hexadienes. *Org. Lett.* **2011**, *13*, 4438-4441.
- (18) Dine, A. N. E.; Khalaf, A.; Grée, D.; Tasseau, O.; Fares, F.; Jaber, N.; Lesot, P.; Hachem, A.; Grée, R. Synthesis of Enones, Pyrazolines and Pyrrolines with *gem*-Difluoroalkyl Side Chains. *Beilstein J. Org. Chem.* **2013**, *9*, 1943-1948.
- (19) Leuger, J.; Blond, G.; Billard, T.; Haufe, G.; Langlois, B. R. 1,4-Additions of Electron-Rich Heterocycles onto *b*-Perfluoroalkyl Enones. *J. Fluorine Chem.* **2011**, *132*, 799-803.

## 8. Copies of $^1\text{H}$ NMR, $^{19}\text{F}$ NMR and $^{13}\text{C}$ NMR Spectra of Compounds 1, 3, 5, 8-15

### Ethyl 5,5-difluoro-5-iodopentanoate (1a)

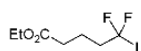

Chemical Formula:  $\text{C}_7\text{H}_{11}\text{F}_2\text{IO}_2$   
Exact Mass: 291.98

$^1\text{H}$  NMR (500 MHz,  $\text{CDCl}_3$ )

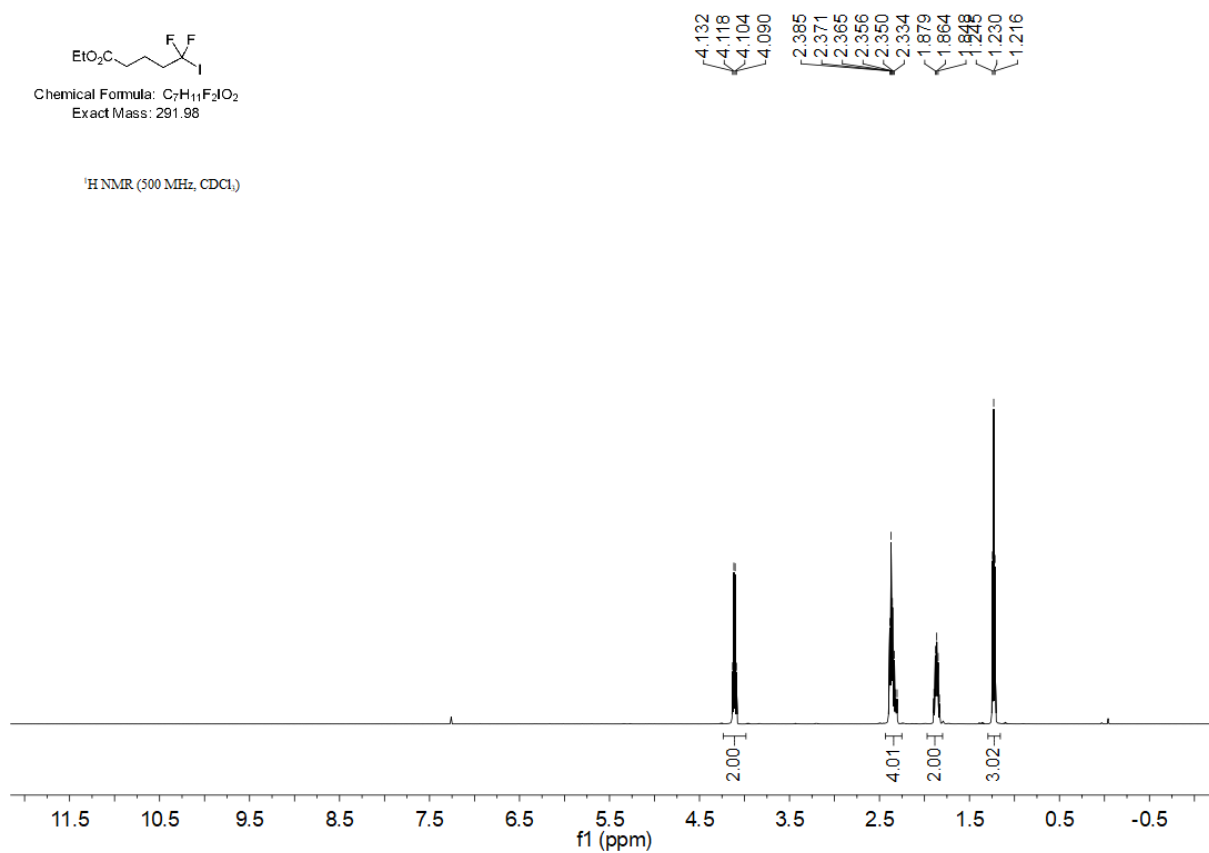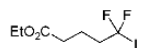

Chemical Formula:  $\text{C}_7\text{H}_{11}\text{F}_2\text{IO}_2$   
Exact Mass: 291.98

$^{19}\text{F}$  NMR (376 MHz,  $\text{cdcl}_3$ )

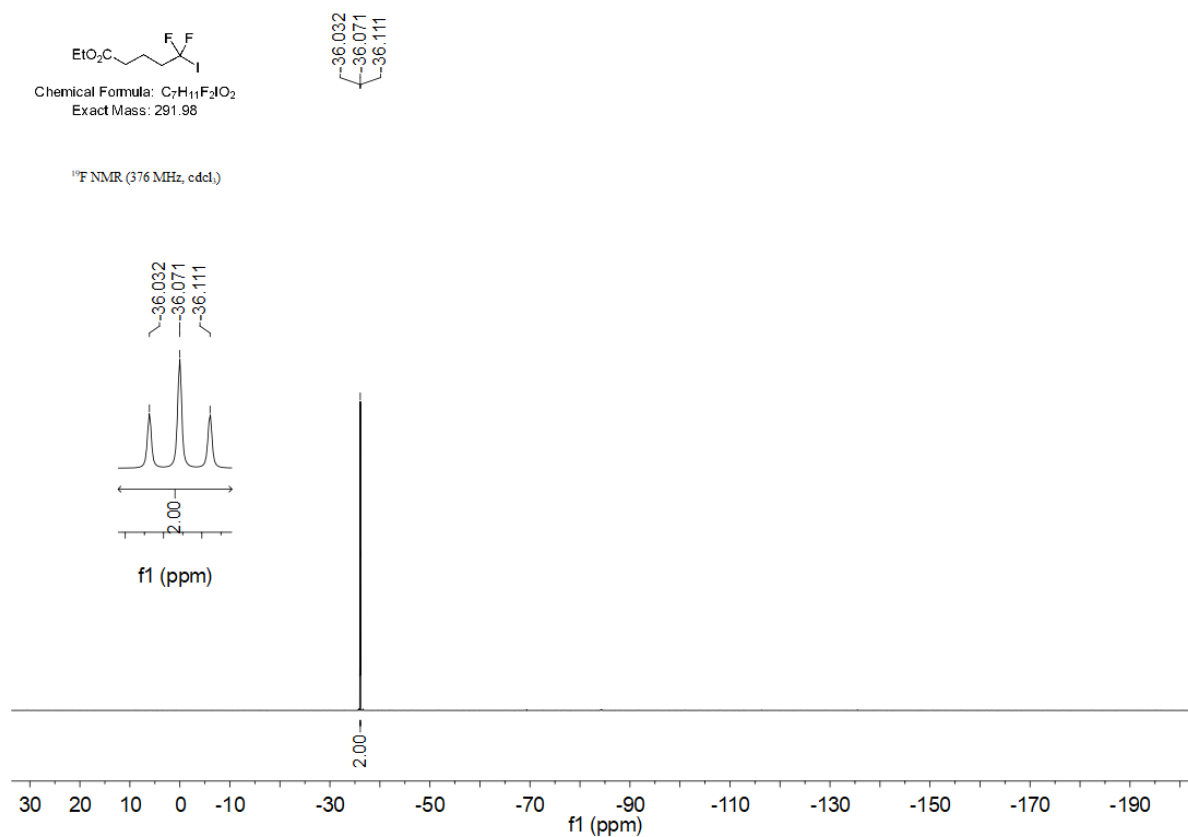

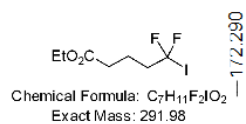

$^{13}C$  NMR (126 MHz,  $CDCl_3$ )

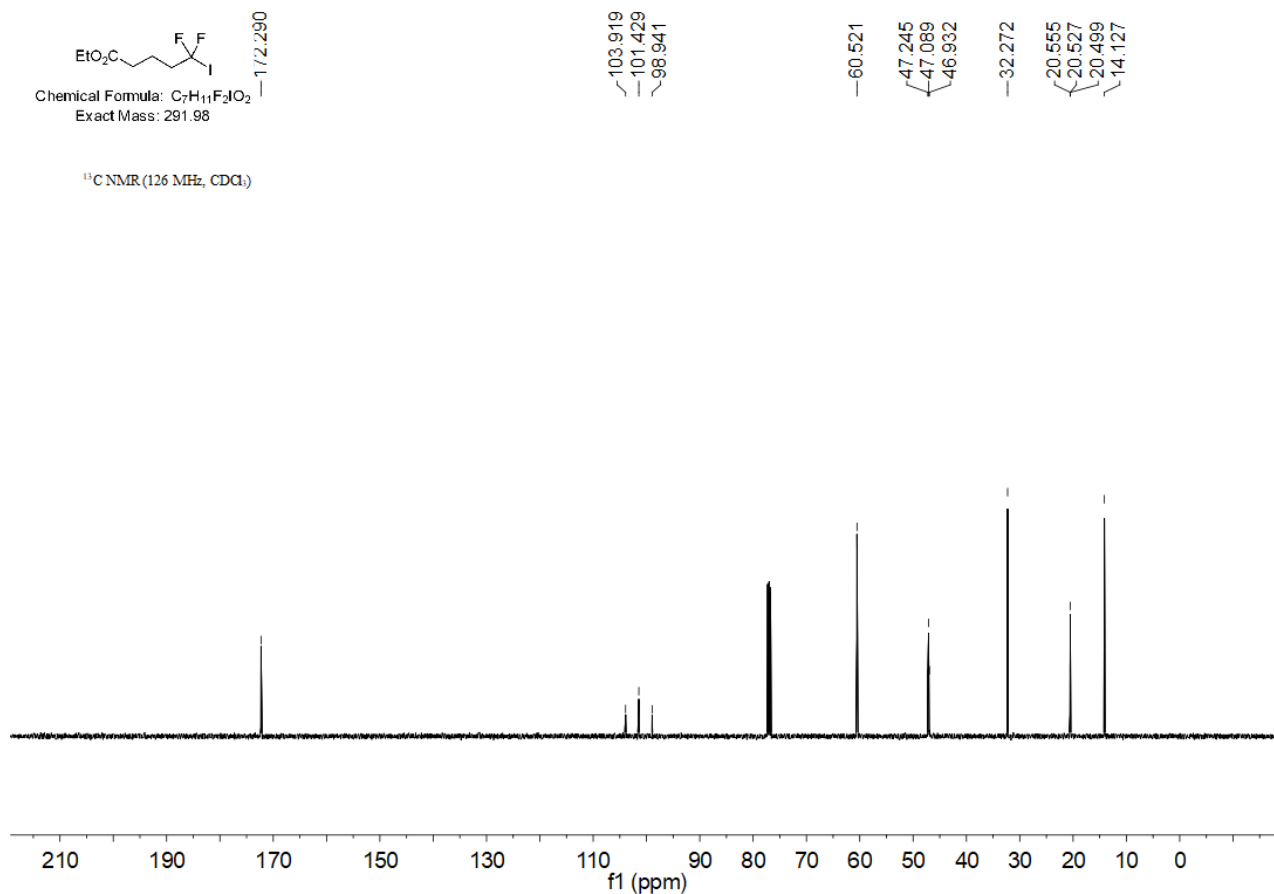

## 2-Bromo-2,2-difluoroethyl ethanesulfonate (1h)

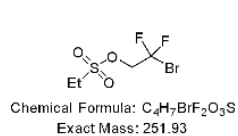

$^1H$  NMR (400 MHz,  $cdcl_3$ )

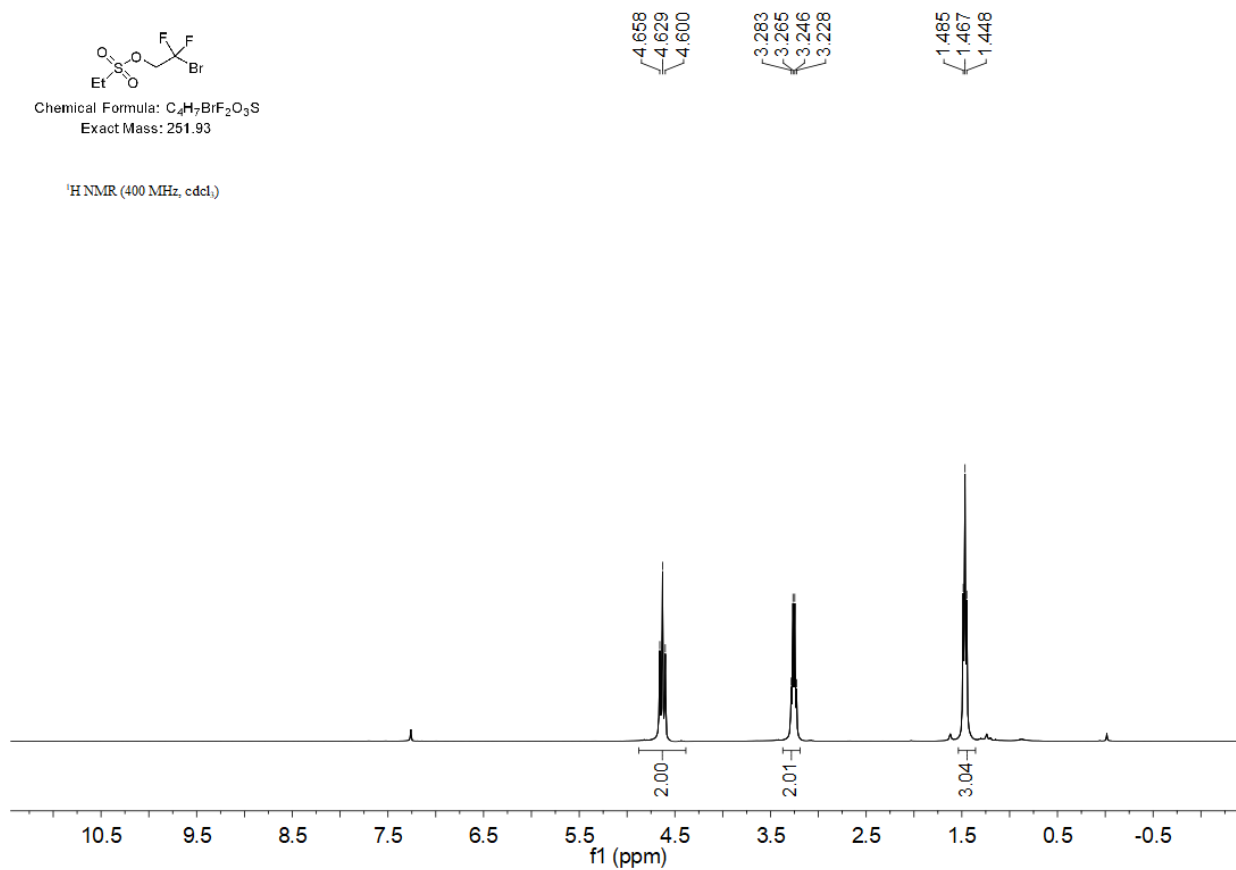

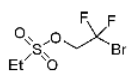

Chemical Formula:  $C_4H_7BrF_2O_3S$   
Exact Mass: 251.93

$^{19}F$  NMR (376 MHz,  $cdCl_3$ )

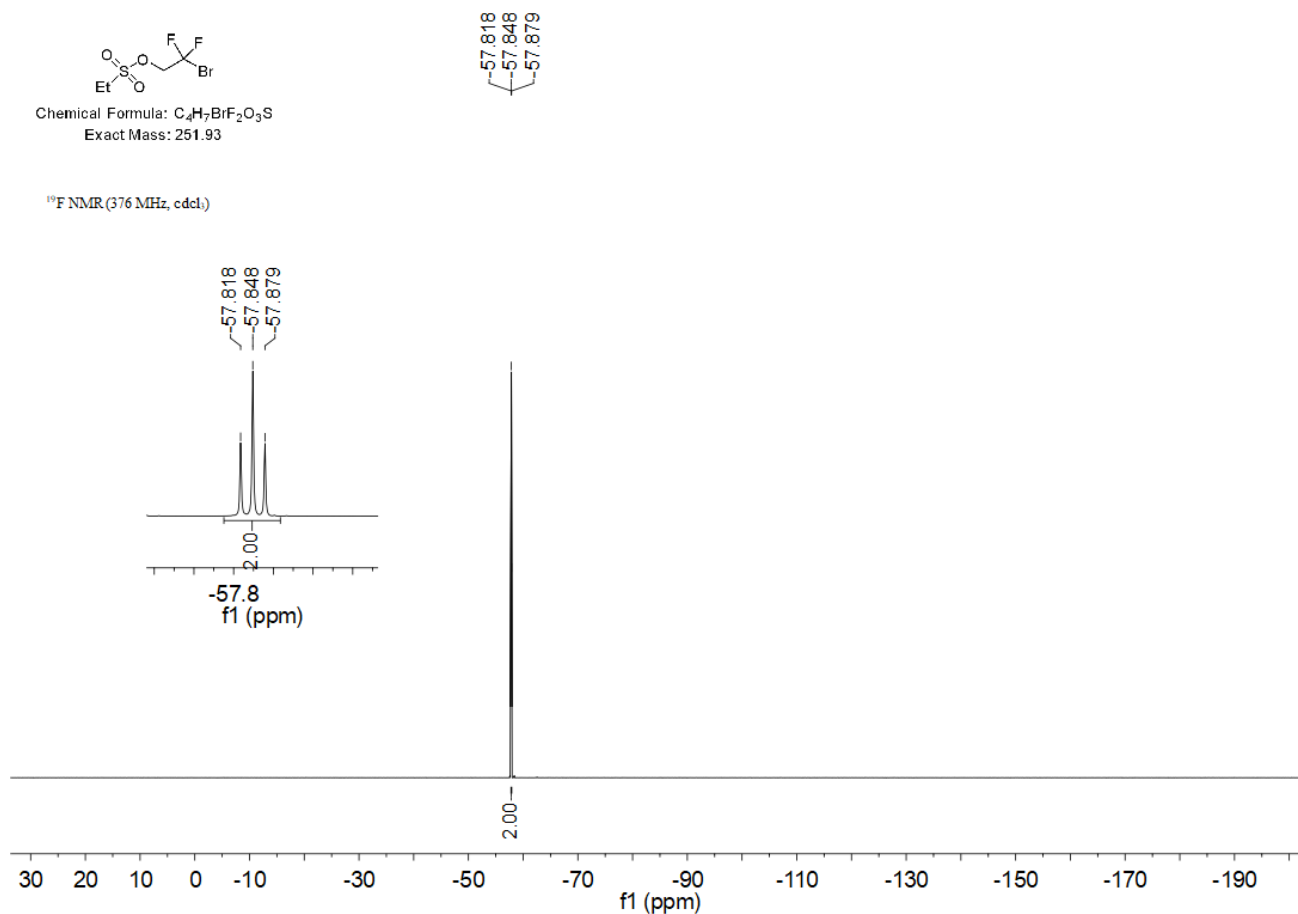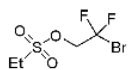

Chemical Formula:  $C_4H_7BrF_2O_3S$   
Exact Mass: 251.93

$^{13}C$  NMR (126 MHz,  $CDCl_3$ )

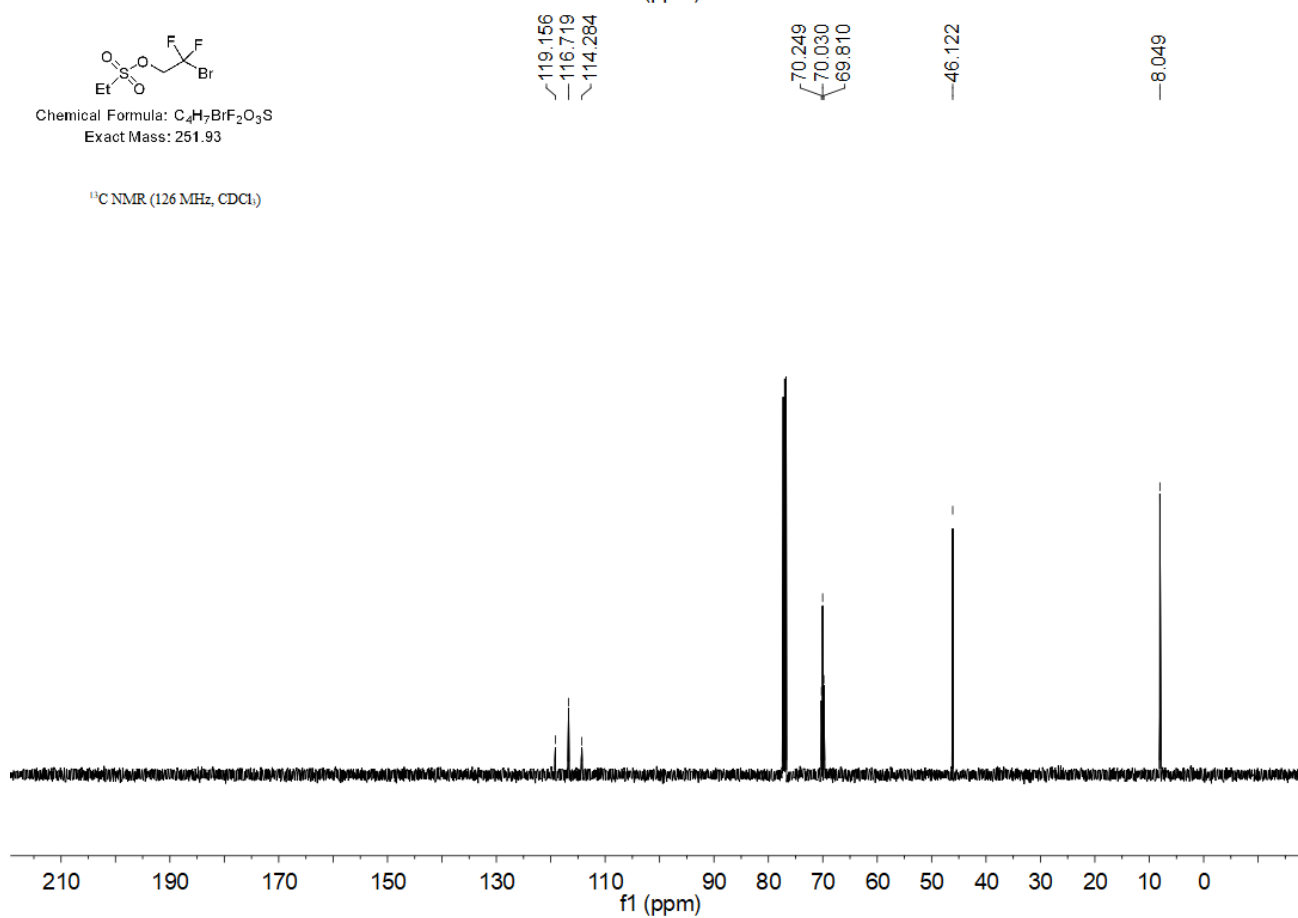



# 6-Bromo-6,6-difluorohexyl benzoate (1i)

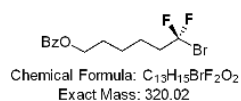

$^1H$  NMR (500 MHz,  $CDCl_3$ )

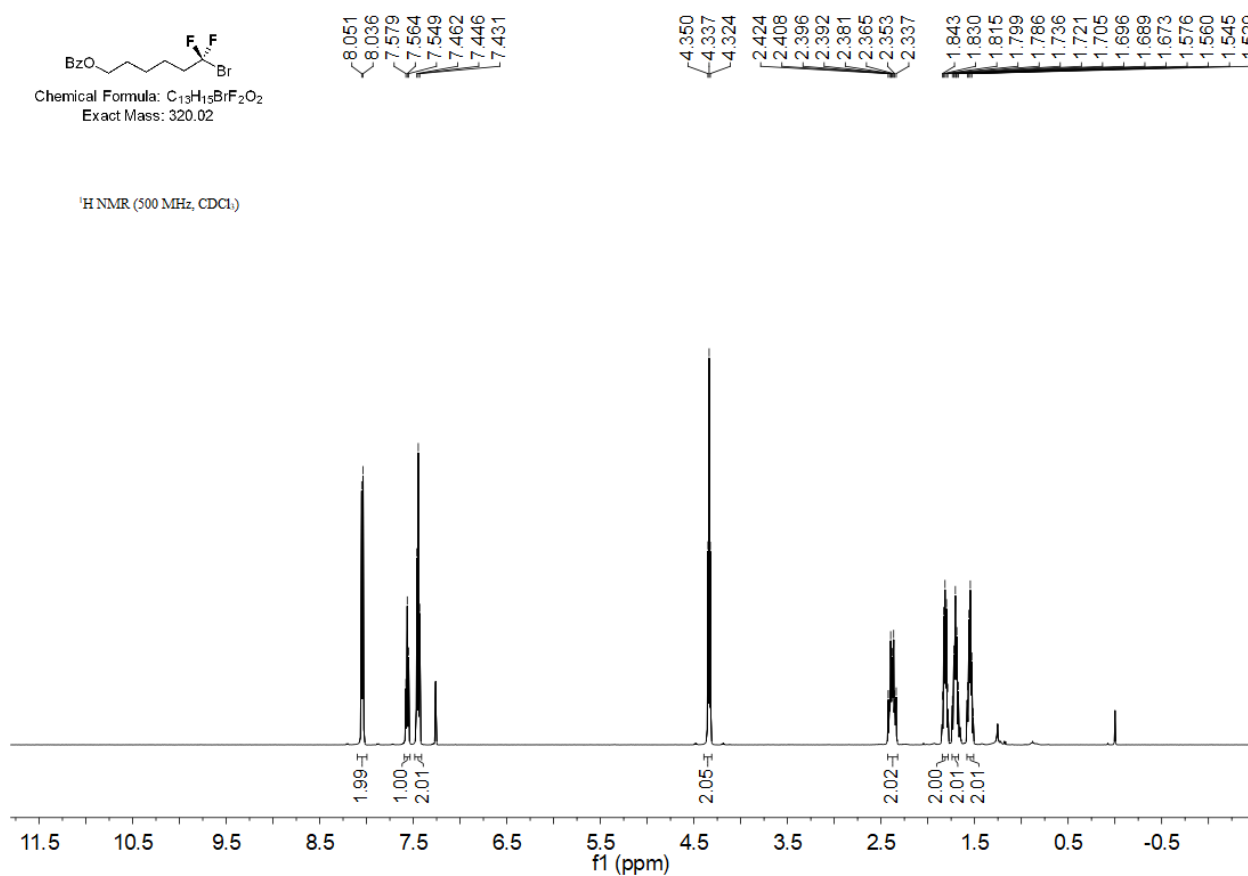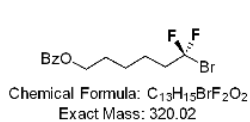

$^{19}F$  NMR (376 MHz,  $cdcl_3$ )

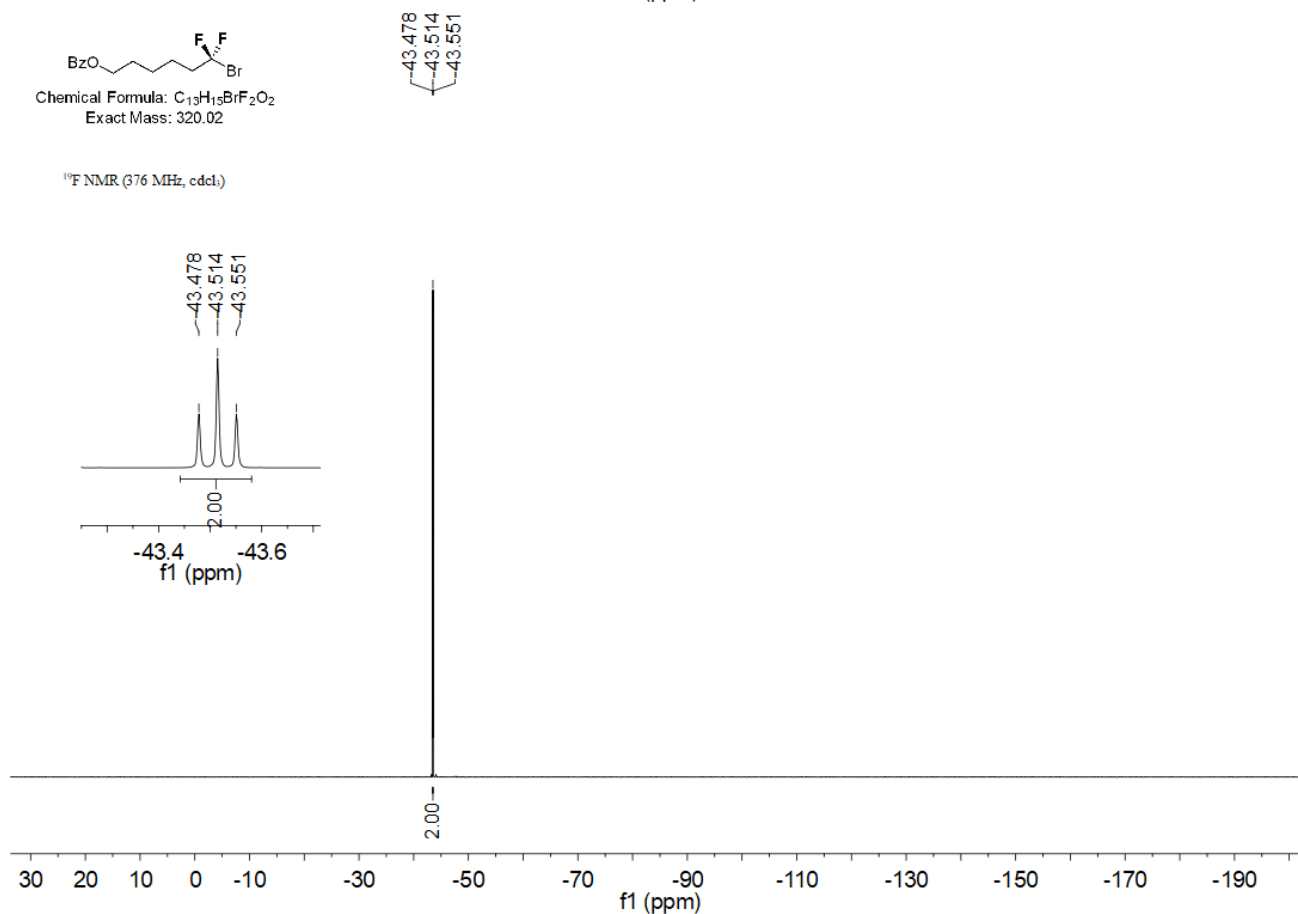

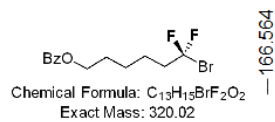

<sup>13</sup>C NMR (126 MHz, CDCl<sub>3</sub>)

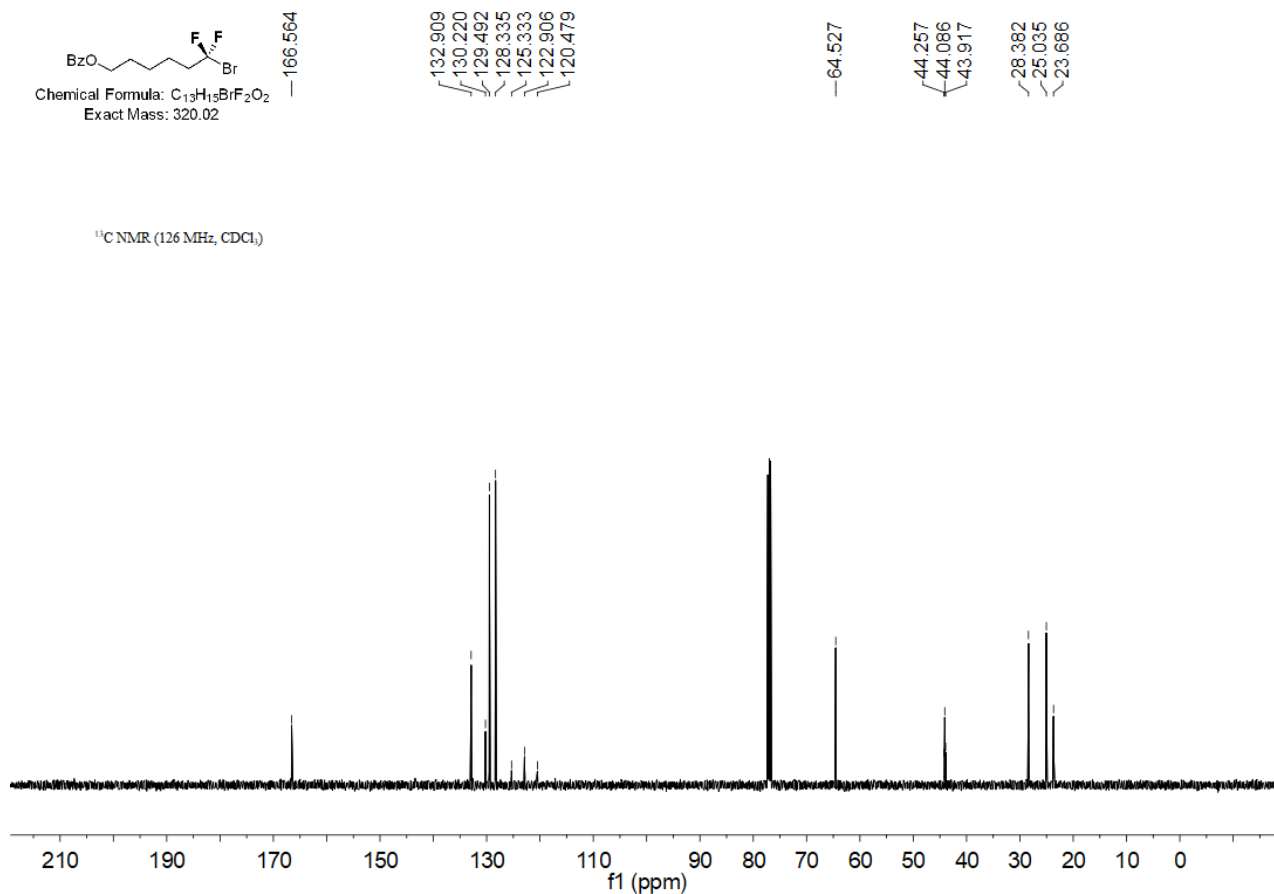

## Mesityl 2-bromo-2,2-difluoroacetate (1k)

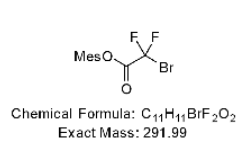

<sup>1</sup>H NMR (400 MHz, cdcl<sub>3</sub>)

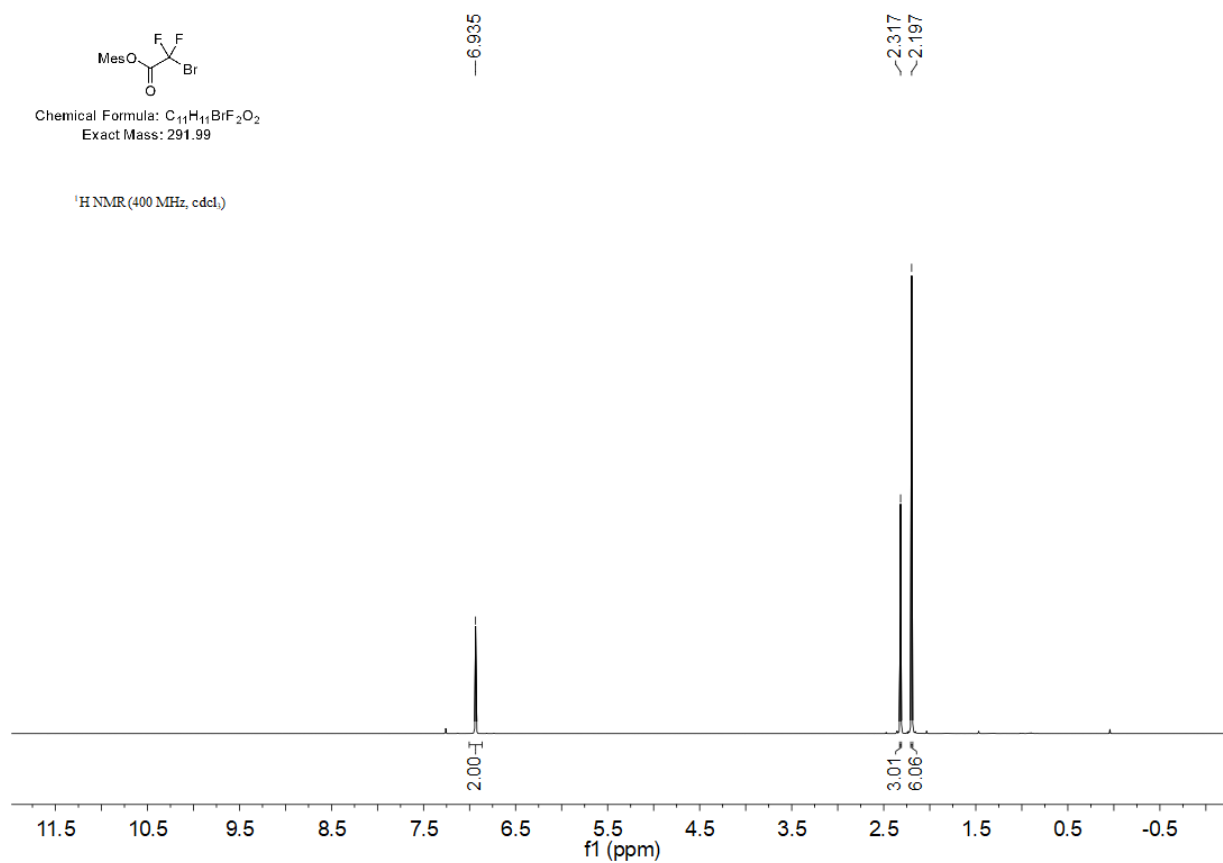

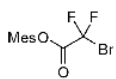

Chemical Formula:  $C_{11}H_{11}BrF_2O_2$   
Exact Mass: 291.99

$^{19}F$  NMR (376 MHz,  $cdCl_3$ )

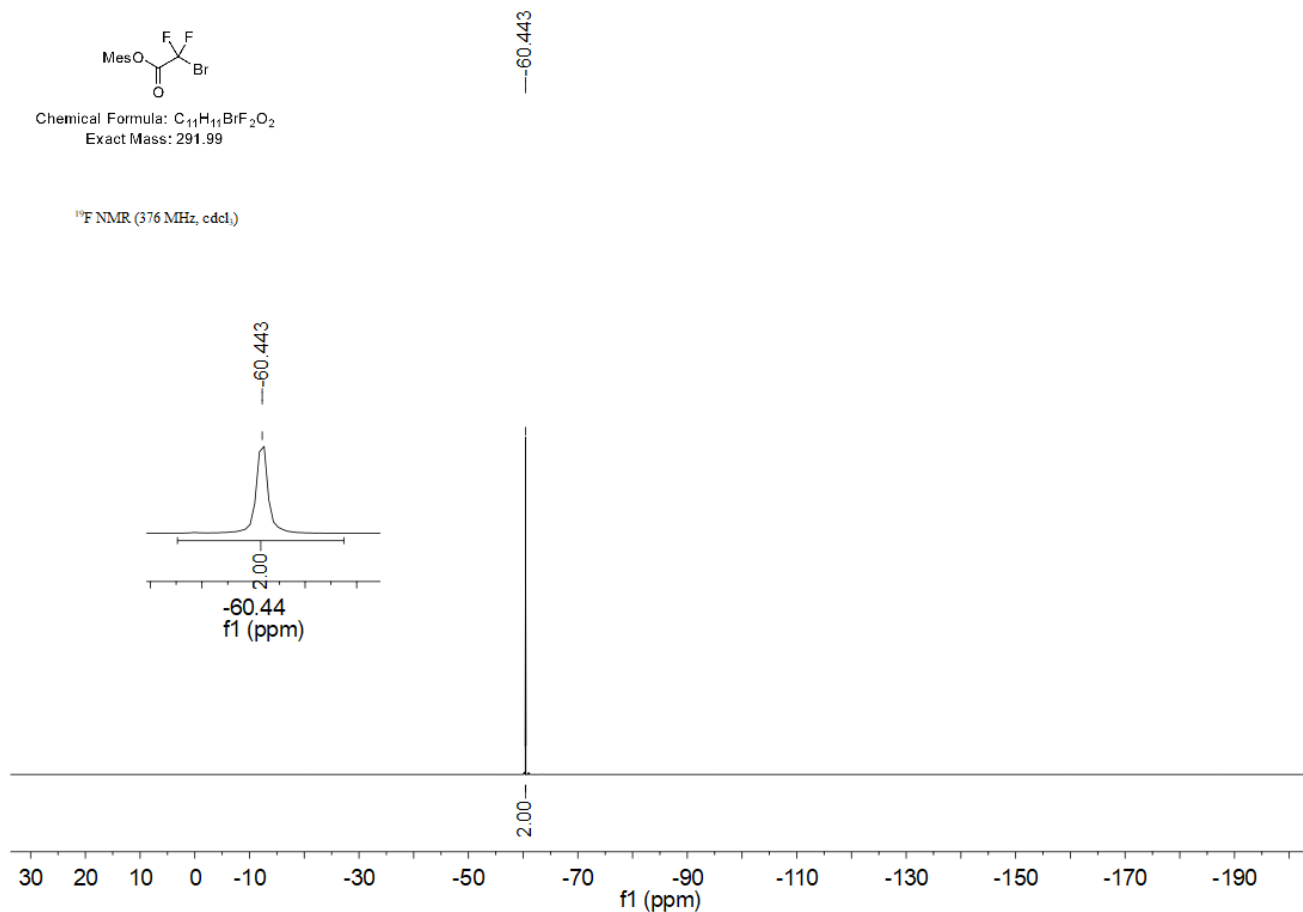

Chemical Formula:  $C_{11}H_{11}BrF_2O_2$   
Exact Mass: 291.99

$^{13}C$  NMR (126 MHz,  $CDCl_3$ )

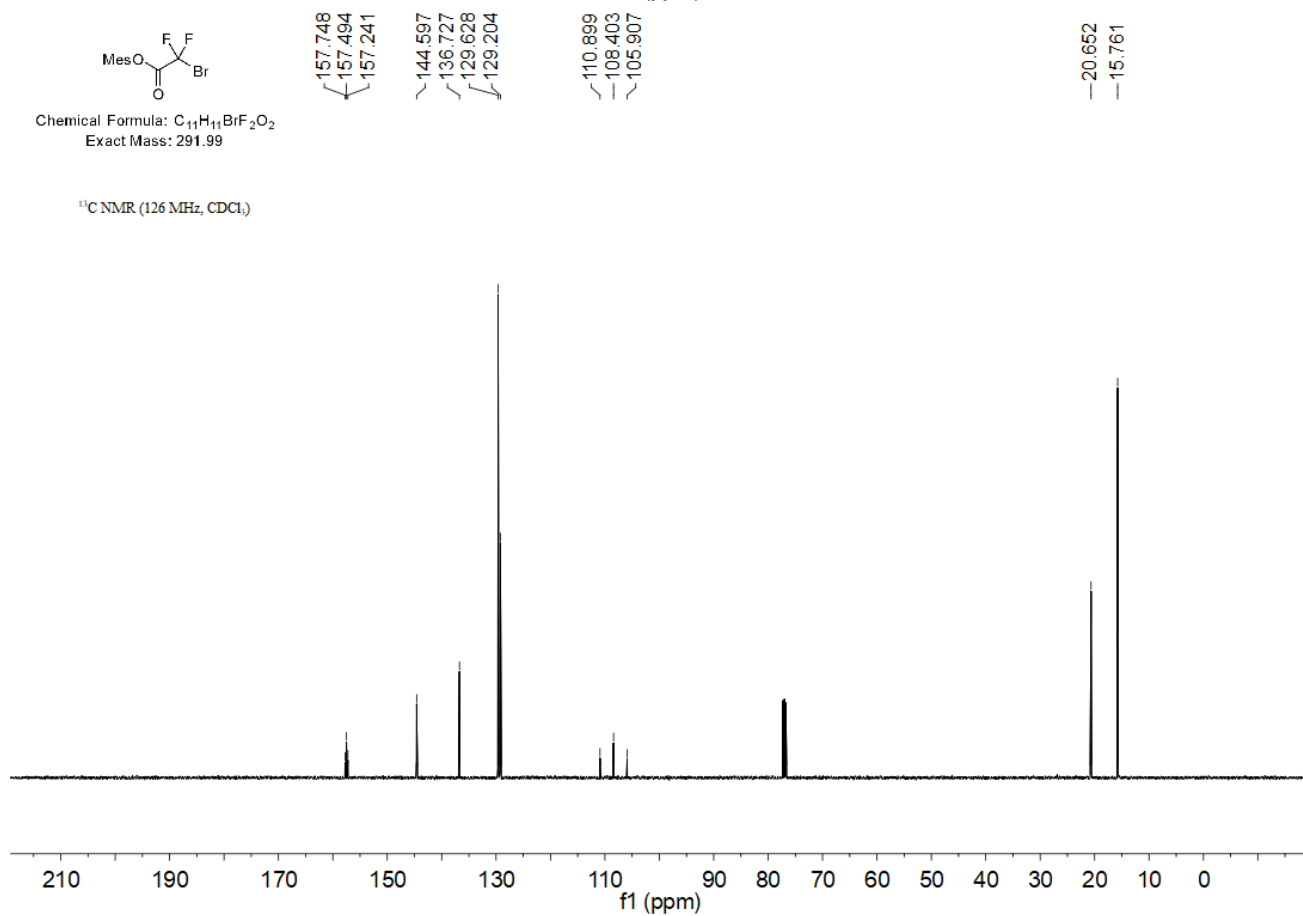

**But-3-en-1-yl (2*S*,5*R*)-3,3-dimethyl-7-oxo-4-thia-1-azabicyclo[3.2.0]heptane-2-carboxylate (5p)**

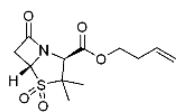

Chemical Formula:  $C_{12}H_{17}NO_5S$   
Exact Mass: 287.08

$^1H$  NMR (400 MHz,  $cdCl_3$ )

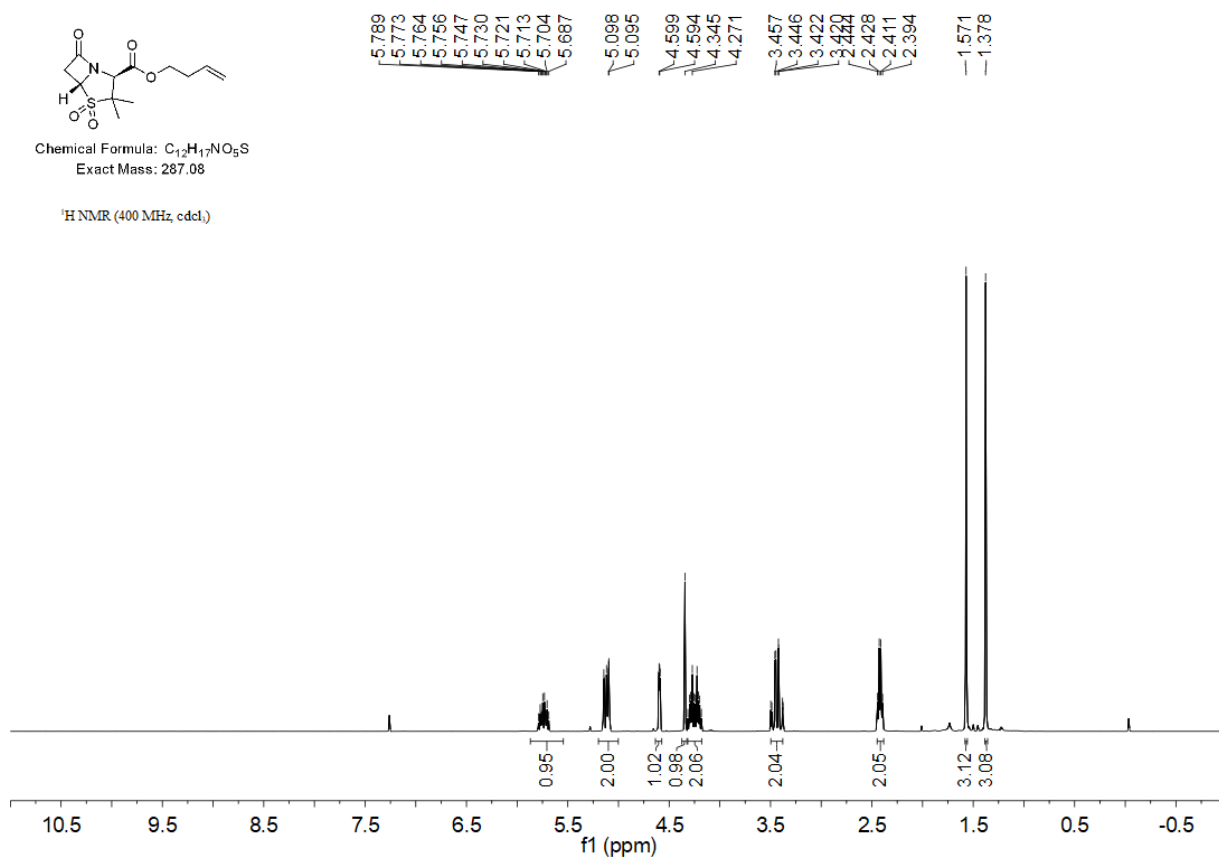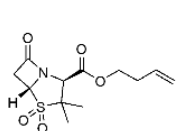

Chemical Formula:  $C_{12}H_{17}NO_5S$   
Exact Mass: 287.08

$^{13}C$  NMR (126 MHz,  $CDCl_3$ )

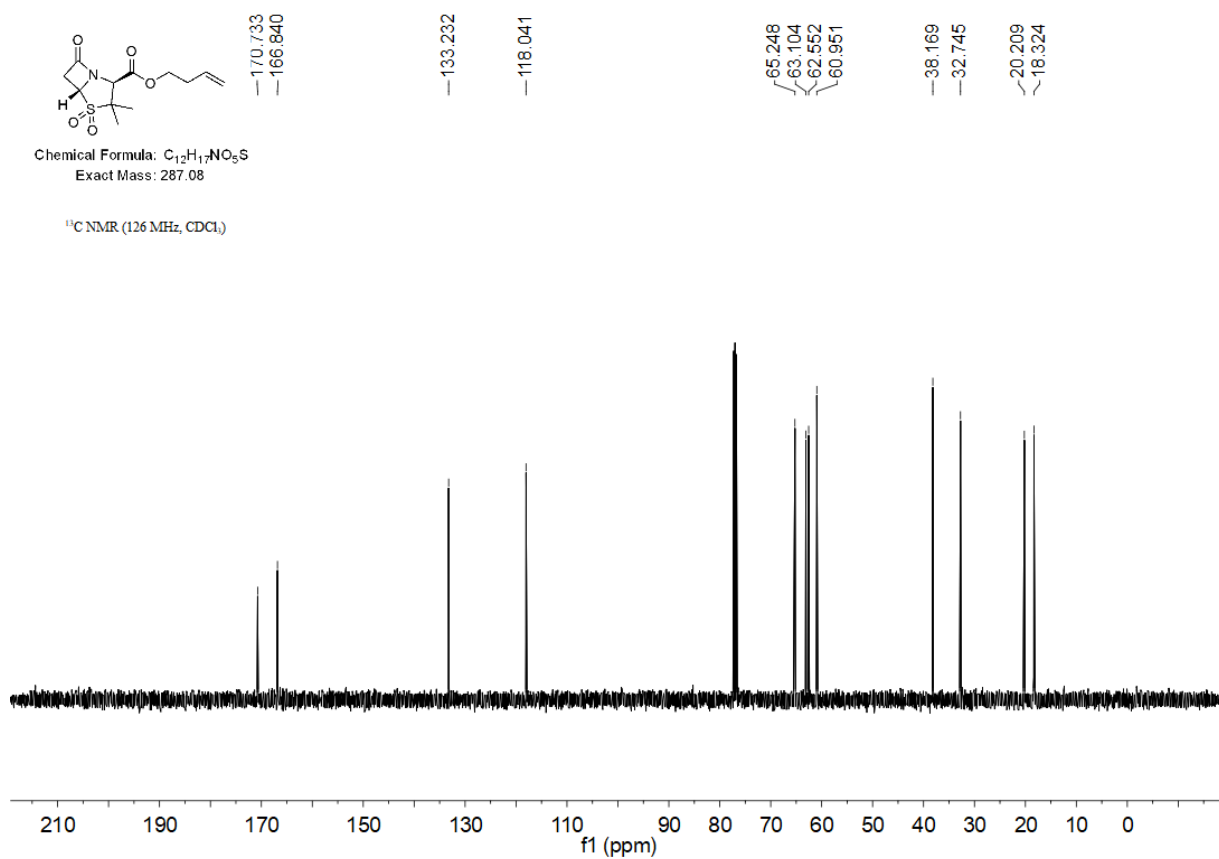

**((3a*R*,5*R*,5a*S*,8a*S*,8b*R*)-2,2,7,7-Tetramethyltetrahydro-5*H*-bis([1,3]dioxolo)[4,5-*b*:4',5'-*d*]pyran-5-yl)methyl but-3-enoate (5r)**

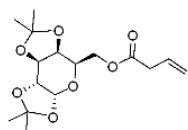

Chemical Formula: C<sub>16</sub>H<sub>24</sub>O<sub>7</sub>  
Exact Mass: 328.15

<sup>1</sup>H NMR (500 MHz, CDCl<sub>3</sub>)

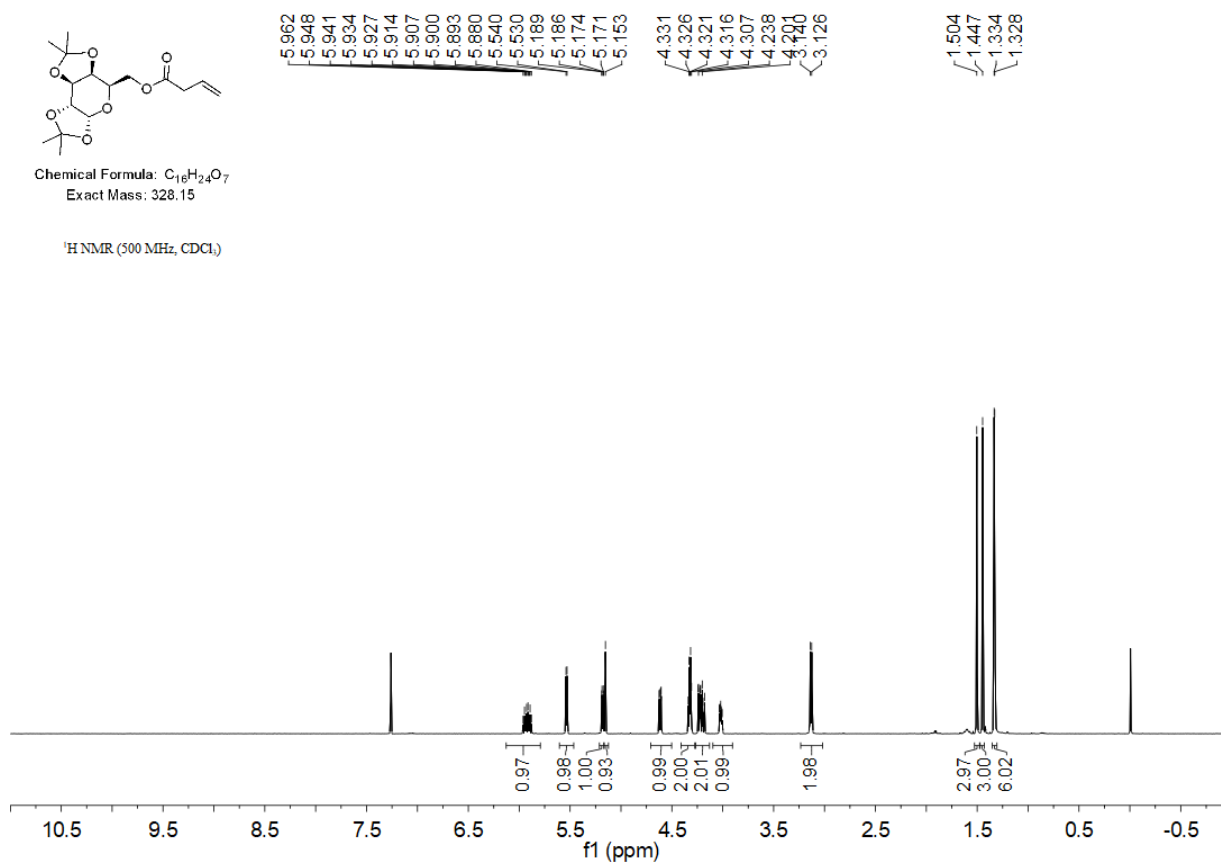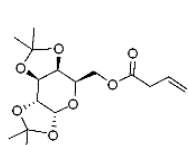

Chemical Formula: C<sub>16</sub>H<sub>24</sub>O<sub>7</sub>  
Exact Mass: 328.15

<sup>13</sup>C NMR (126 MHz, CDCl<sub>3</sub>)

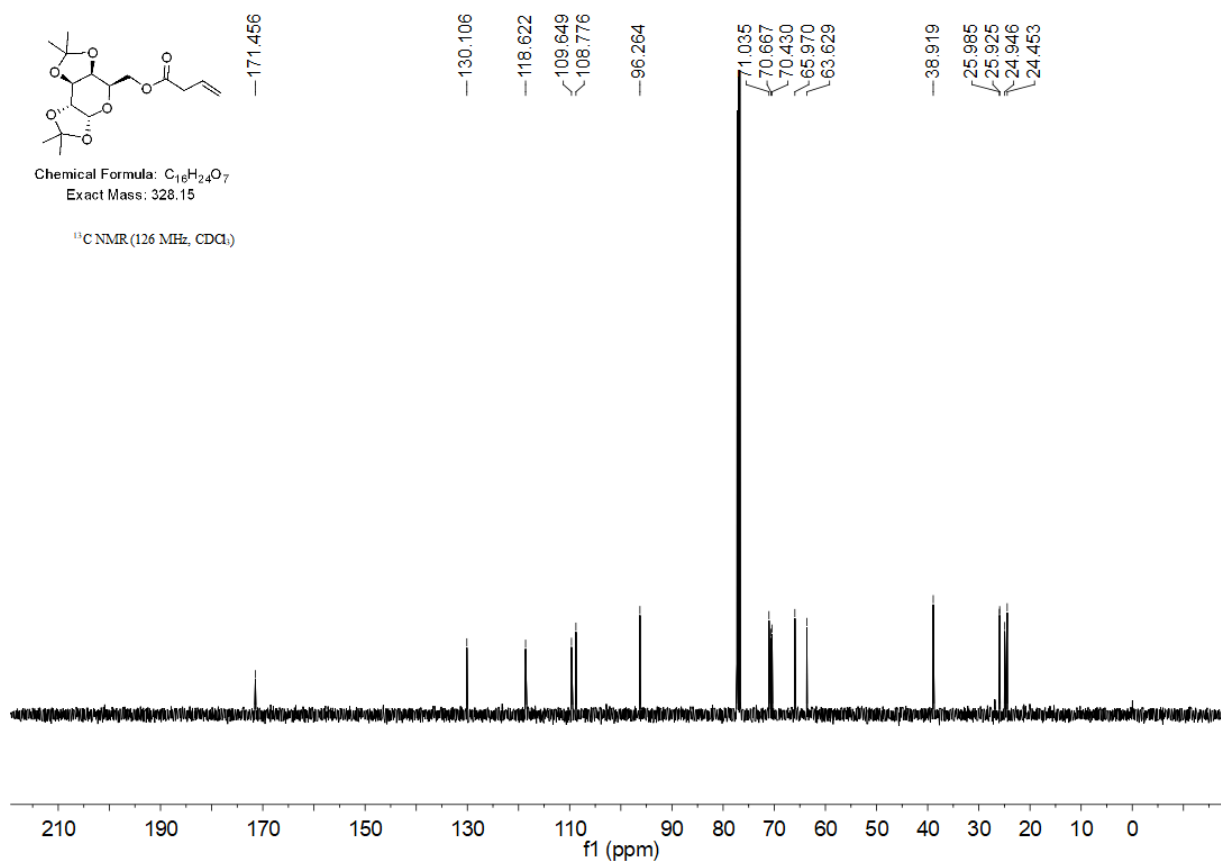

# But-3-en-1-yl 2-(3-cyano-4-isobutoxyphenyl)-4-methylthiazole-5-carboxylate (5s)

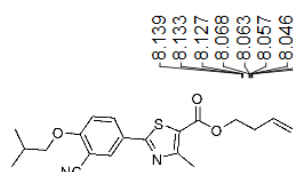

Chemical Formula:  $C_{20}H_{22}N_2O_3S$   
Exact Mass: 370.14

$^1H$  NMR (400 MHz,  $CDCl_3$ )

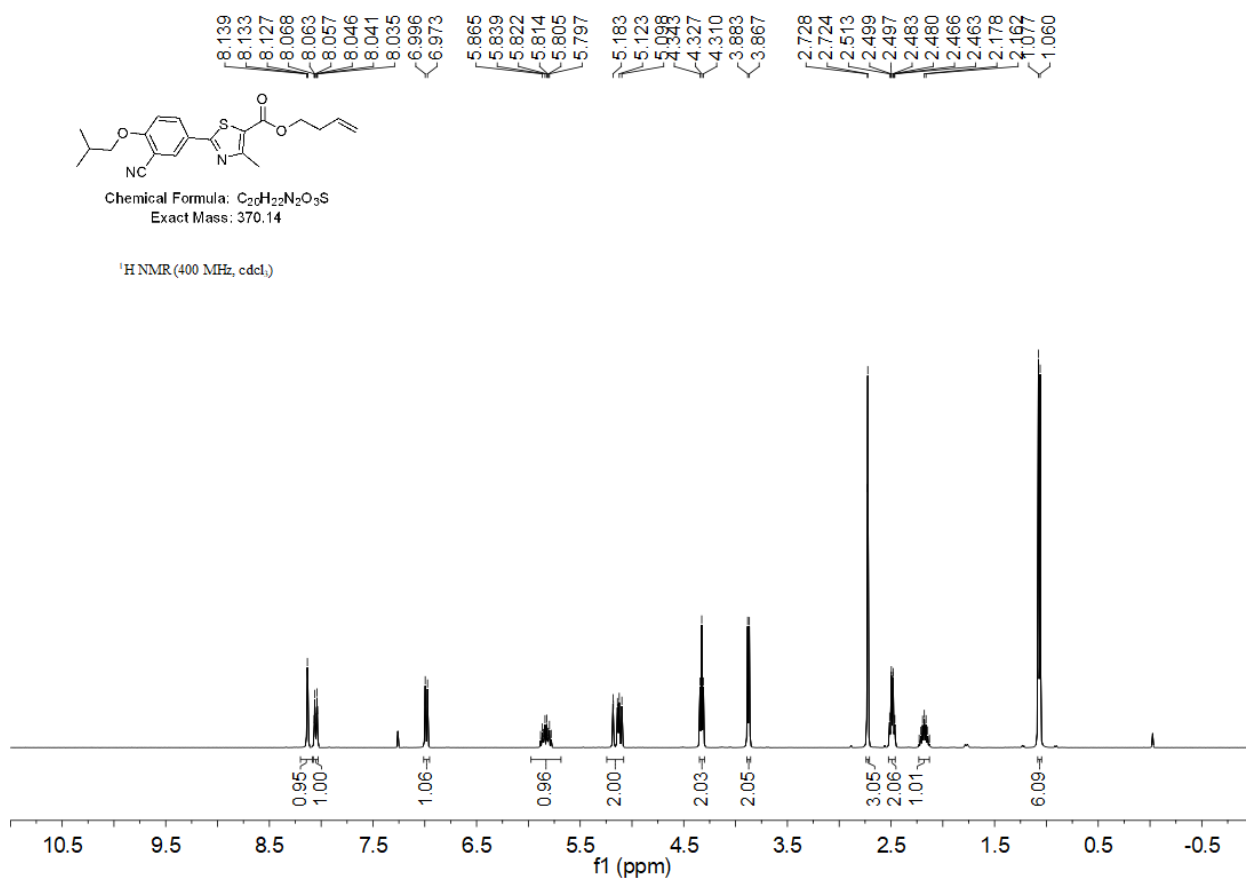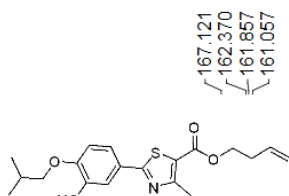

Chemical Formula:  $C_{20}H_{22}N_2O_3S$   
Exact Mass: 370.14

$^{13}C$  NMR (126 MHz,  $CDCl_3$ )

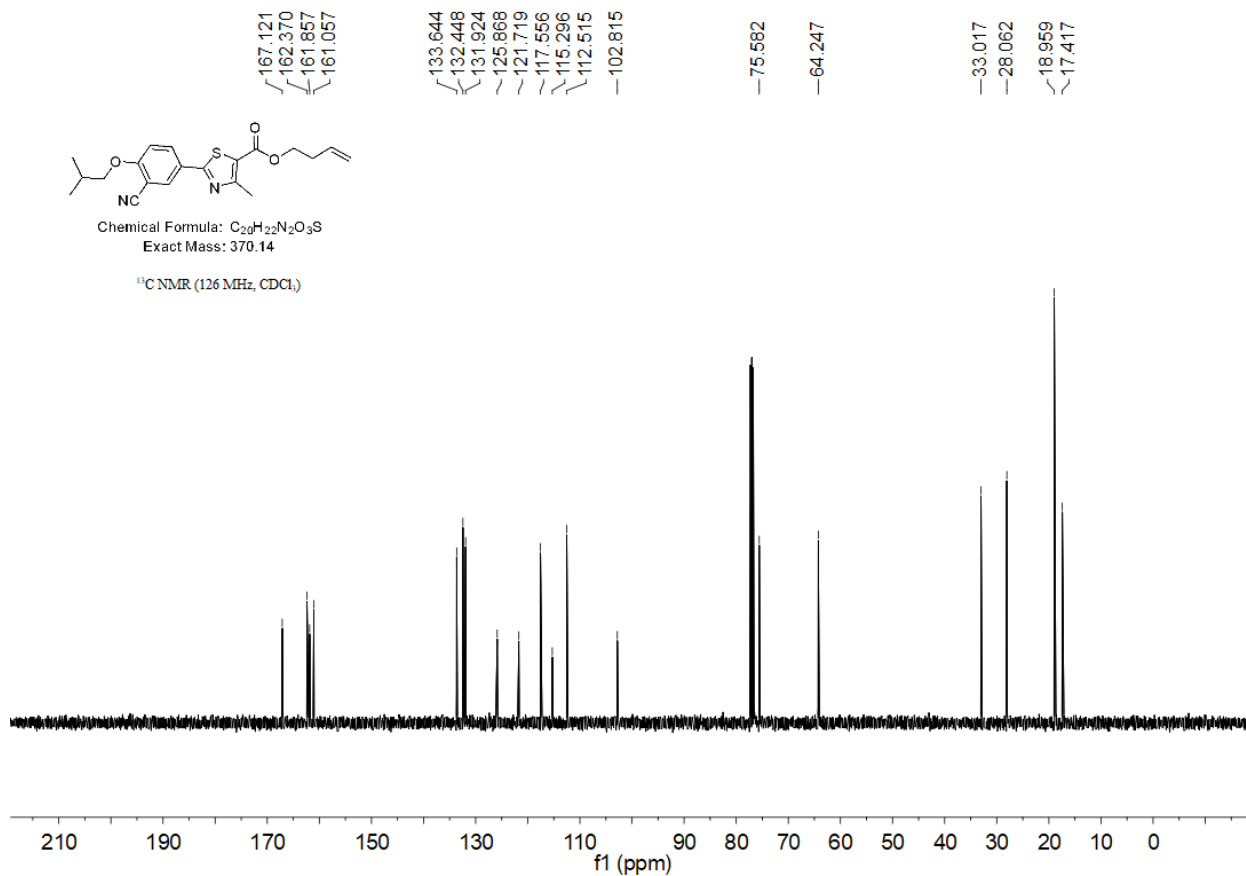

# **Ethyl 7-(dimethyl(phenyl)silyl)-5,5-difluoroheptanoate (3a)**

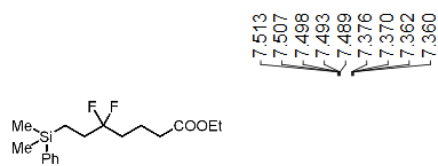

$^1H$  NMR (400 MHz,  $cdCl_3$ )

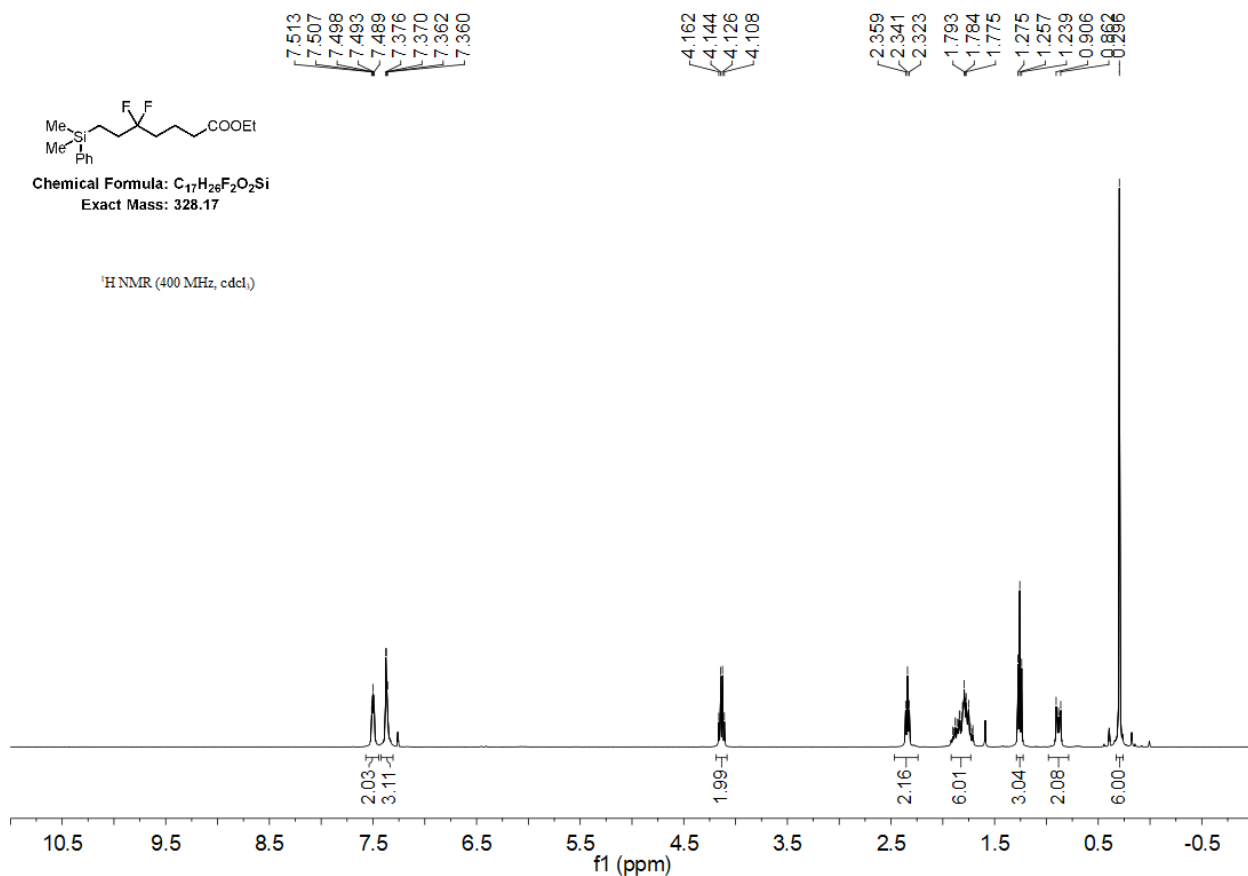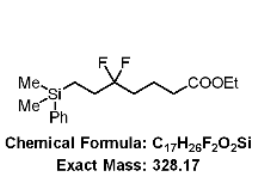

$^{19}F$  NMR (376 MHz,  $cdCl_3$ )

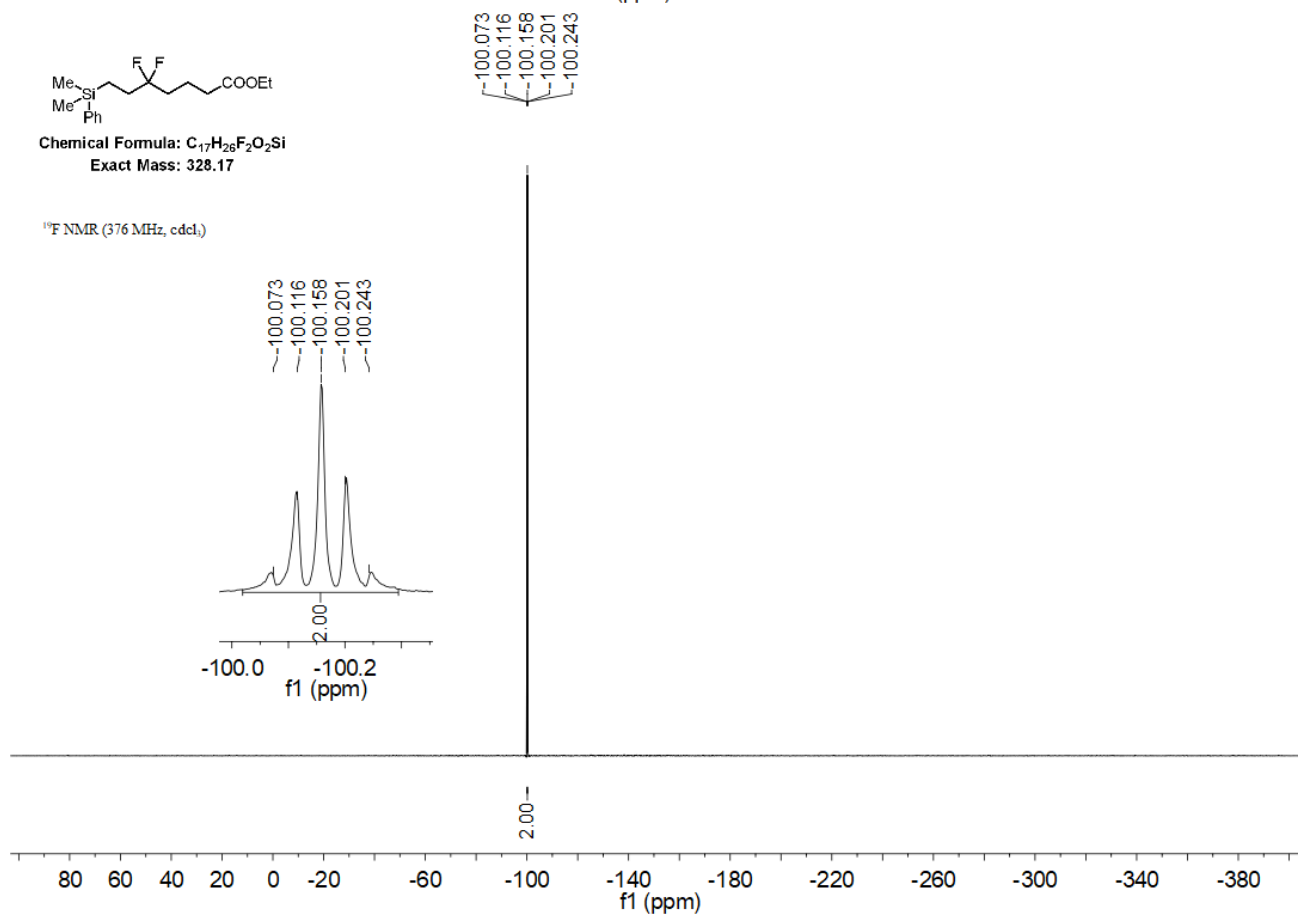

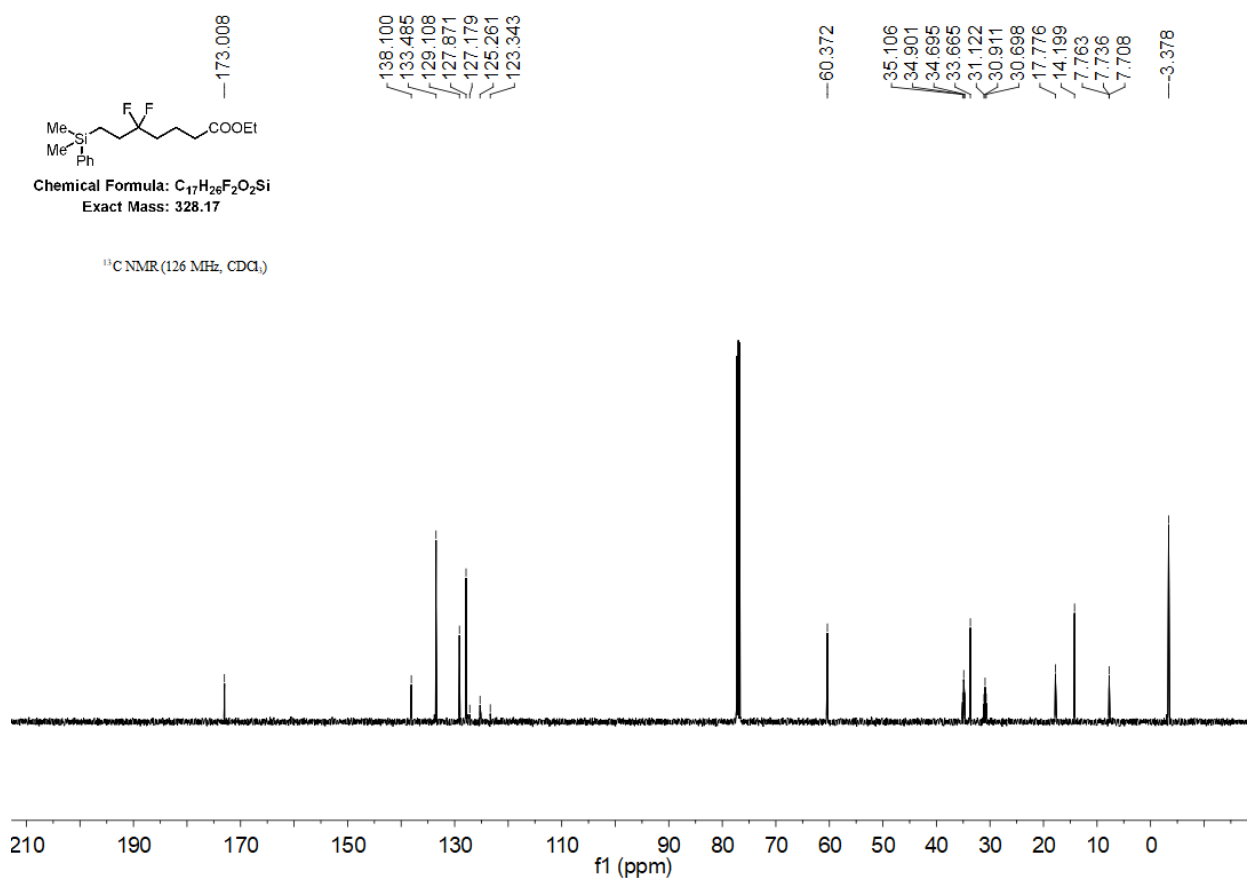

**tert-Butyl((6-(dimethyl(phenyl)silyl)-4,4-difluorohexyl)oxy)dimethylsilane (3b)**

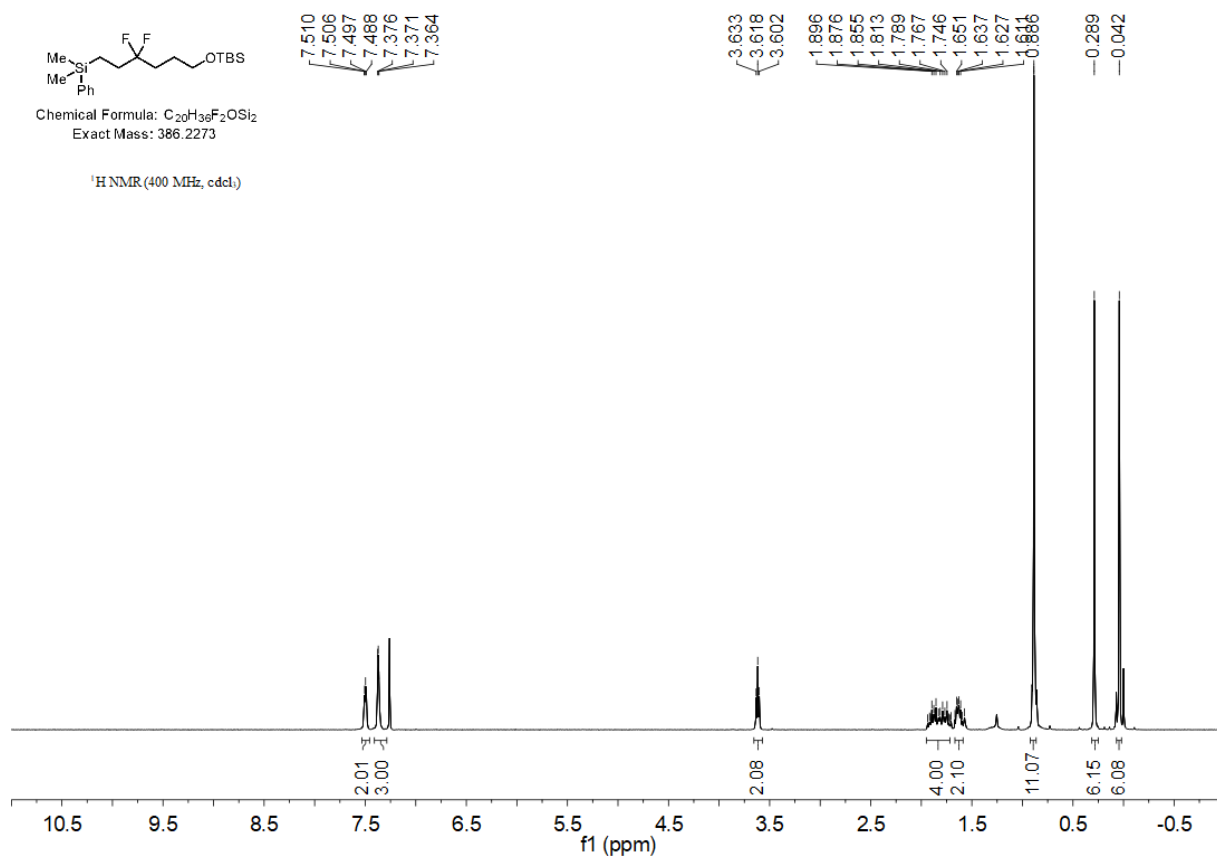





# 6-(Dimethyl(phenyl)silyl)-4,4-difluorohexyl 4-chlorobenzoate (3c)

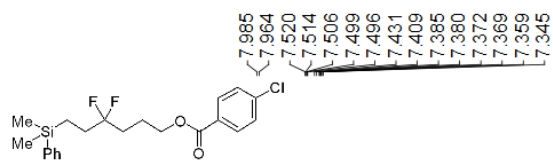

Chemical Formula:  $C_{21}H_{25}ClF_2O_2Si$

Exact Mass: 410.1280

$^1H$  NMR (400 MHz,  $cdCl_3$ )

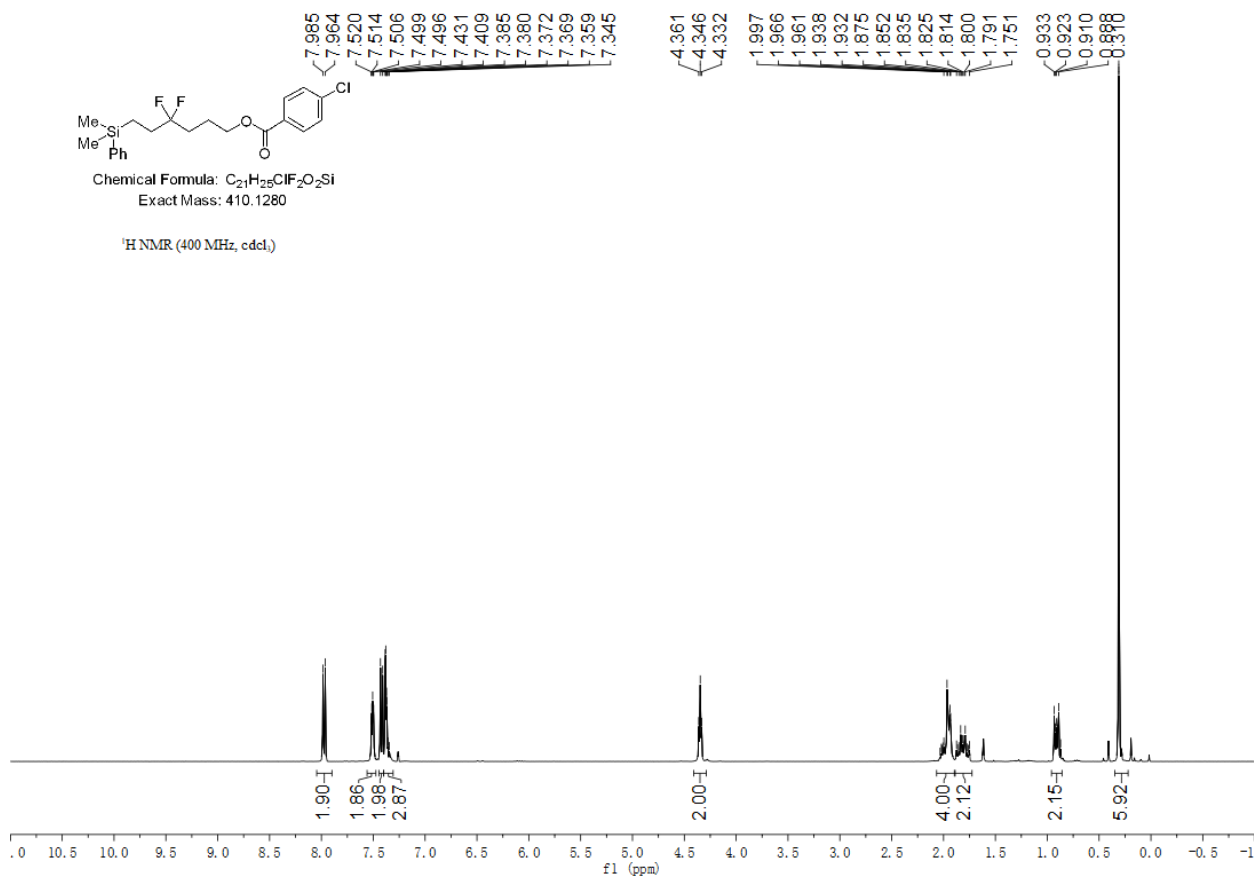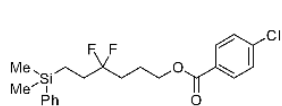

Chemical Formula:  $C_{21}H_{25}ClF_2O_2Si$

Exact Mass: 410.13

$^{13}C$  NMR (376 MHz,  $cdCl_3$ )

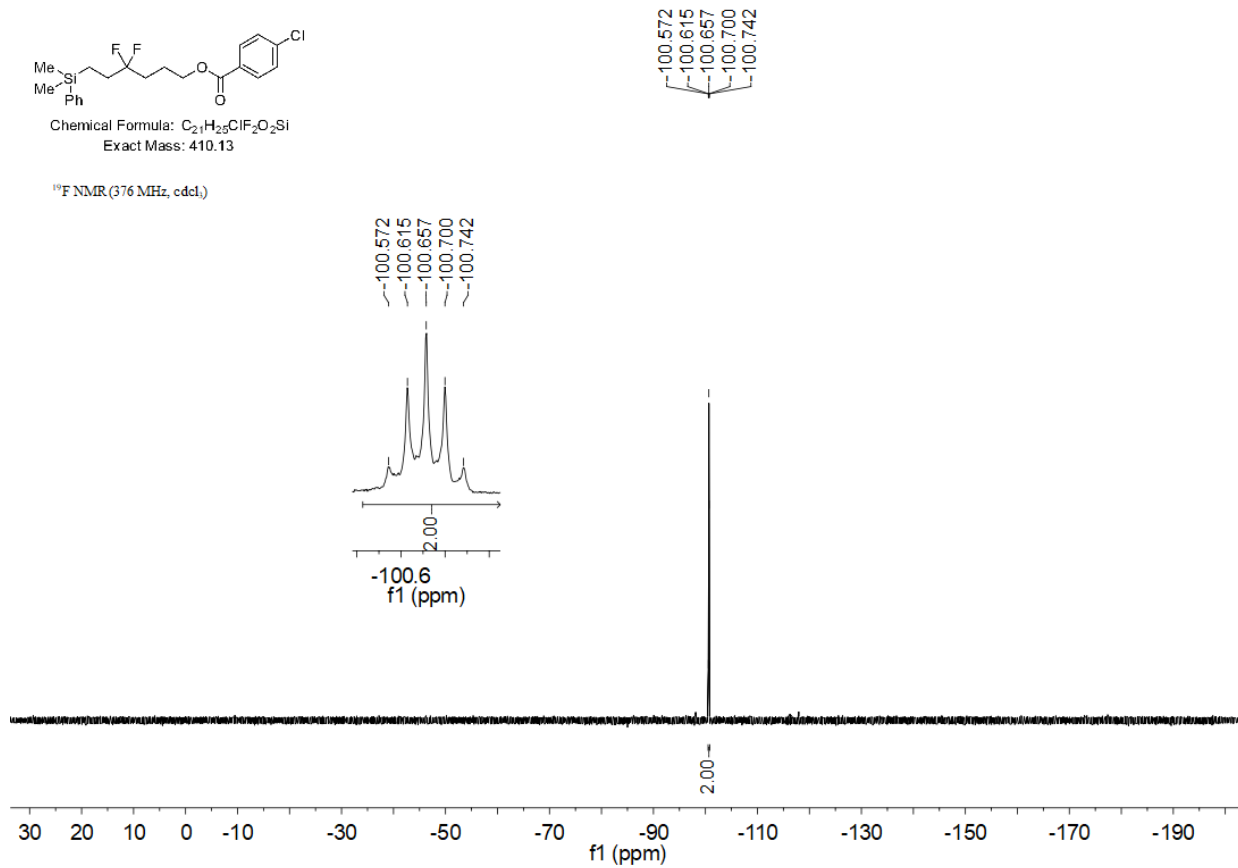

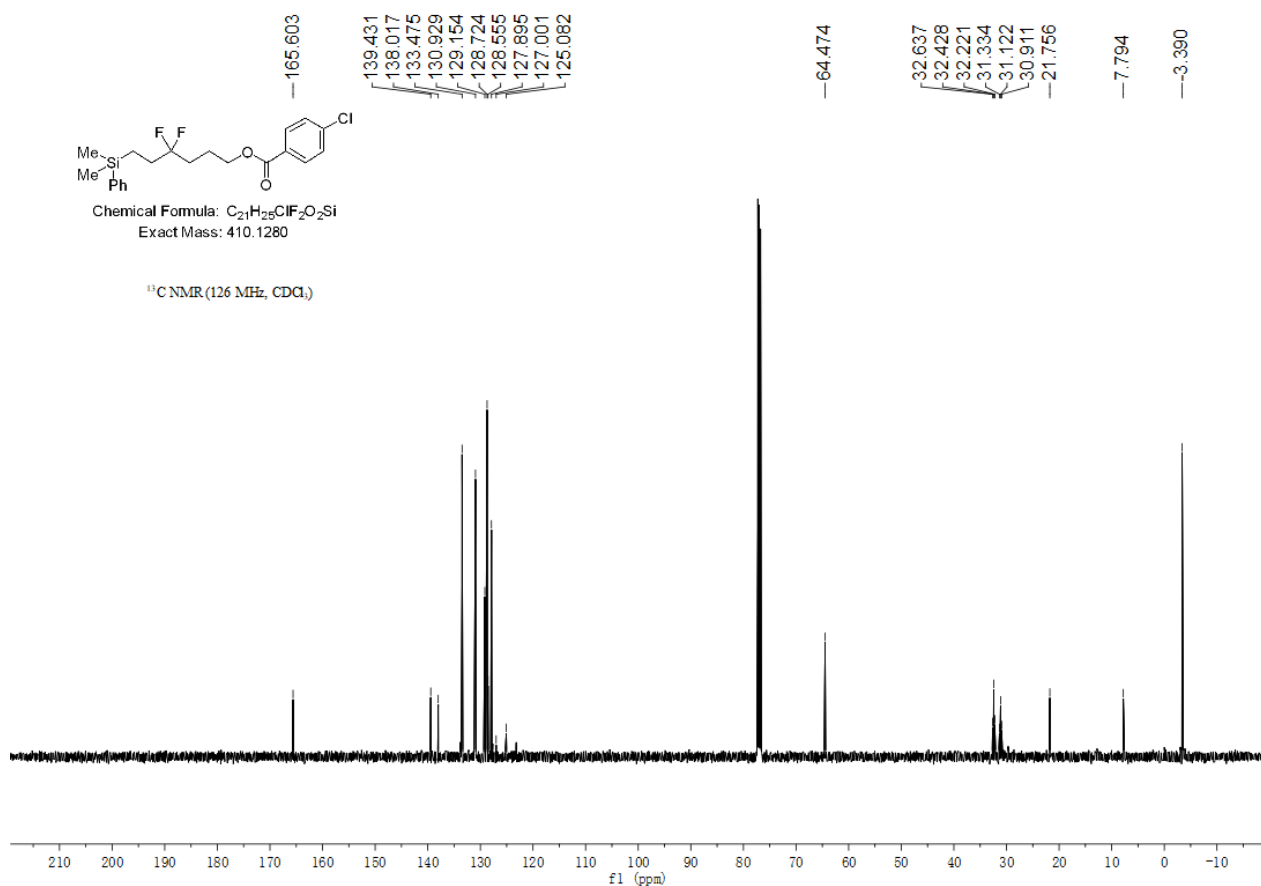

### 4,4-Difluoro-6-(trimethylsilyl)hexyl 4-chlorobenzoate (3d)

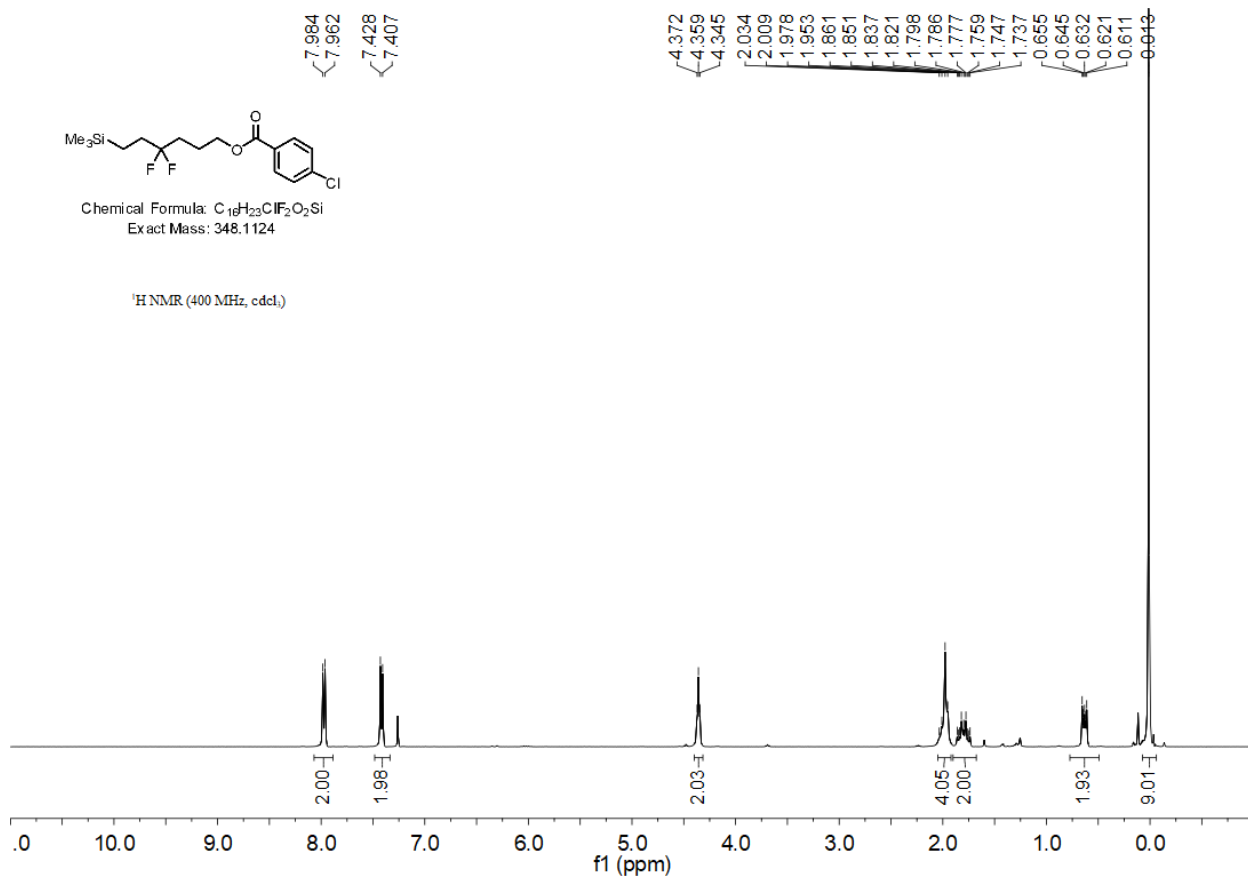

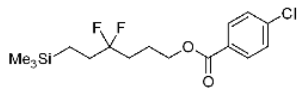

Chemical Formula:  $C_{16}H_{23}ClF_2O_2Si$   
Exact Mass: 348.11

$^{19}F$  NMR (376 MHz,  $cdCl_3$ )

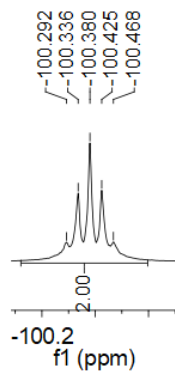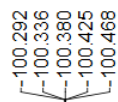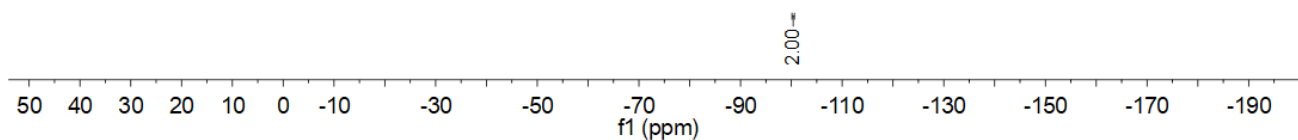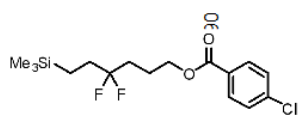

Chemical Formula:  $C_{16}H_{23}ClF_2O_2Si$   
Exact Mass: 348.1124

$^{13}C$  NMR (101 MHz,  $cdCl_3$ )

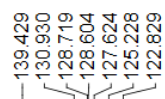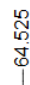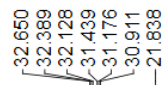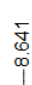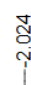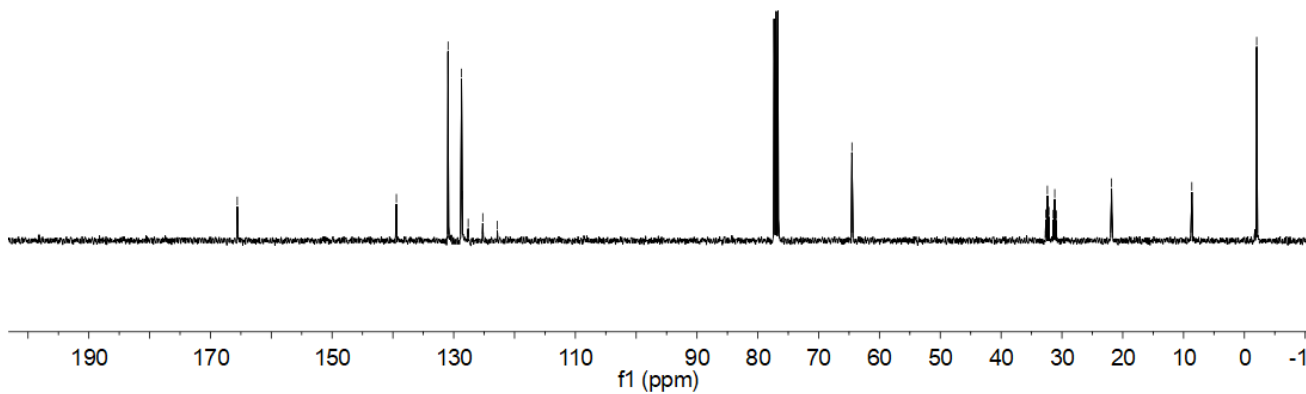

# 7-(Dimethyl(phenyl)silyl)-5,5-difluoroheptyl acetate (3e)

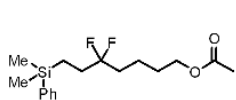

Chemical Formula:  $C_{17}H_{26}F_2O_2Si$   
Exact Mass: 328.1670

$^1H$  NMR (400 MHz,  $cdCl_3$ )

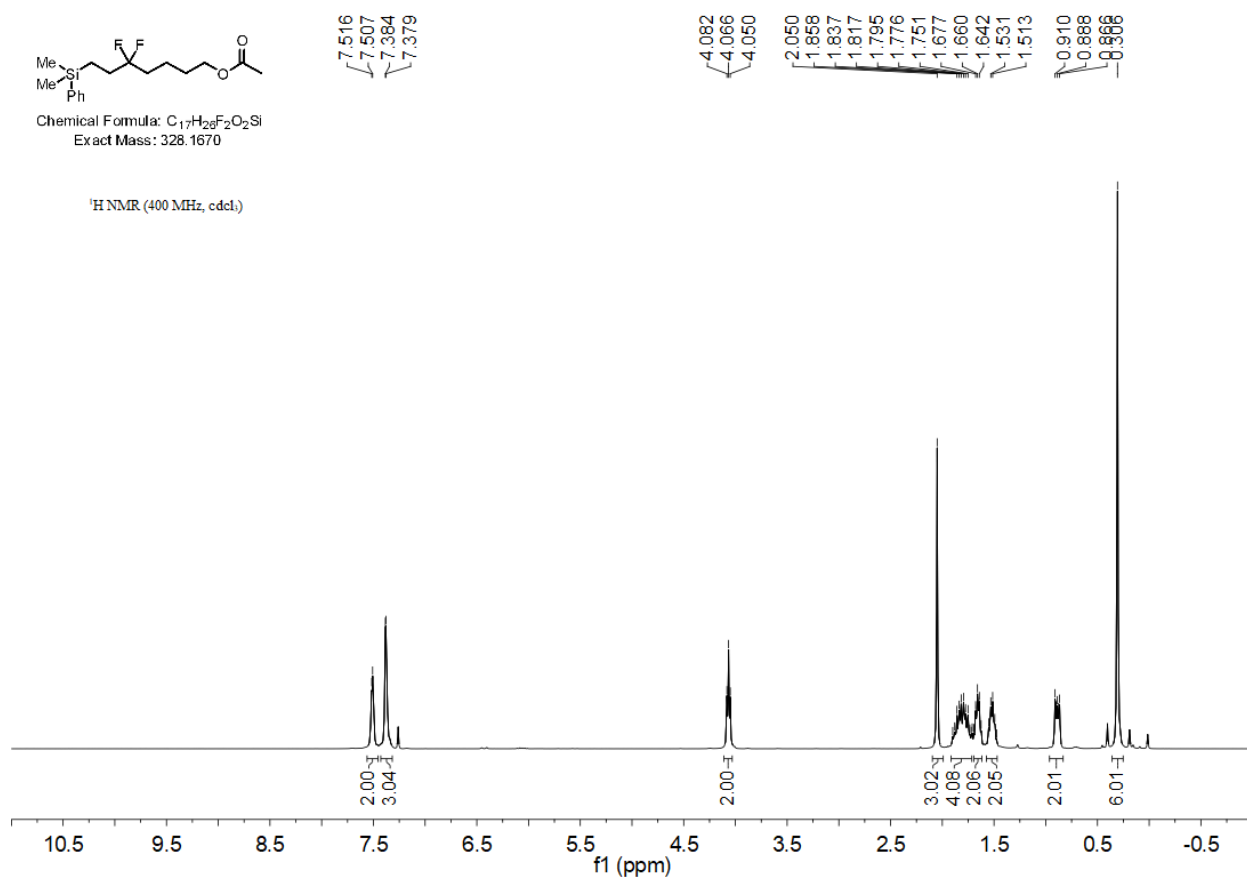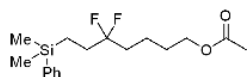

Chemical Formula:  $C_{17}H_{26}F_2O_2Si$   
Exact Mass: 328.17

$^{19}F$  NMR (376 MHz,  $cdCl_3$ )

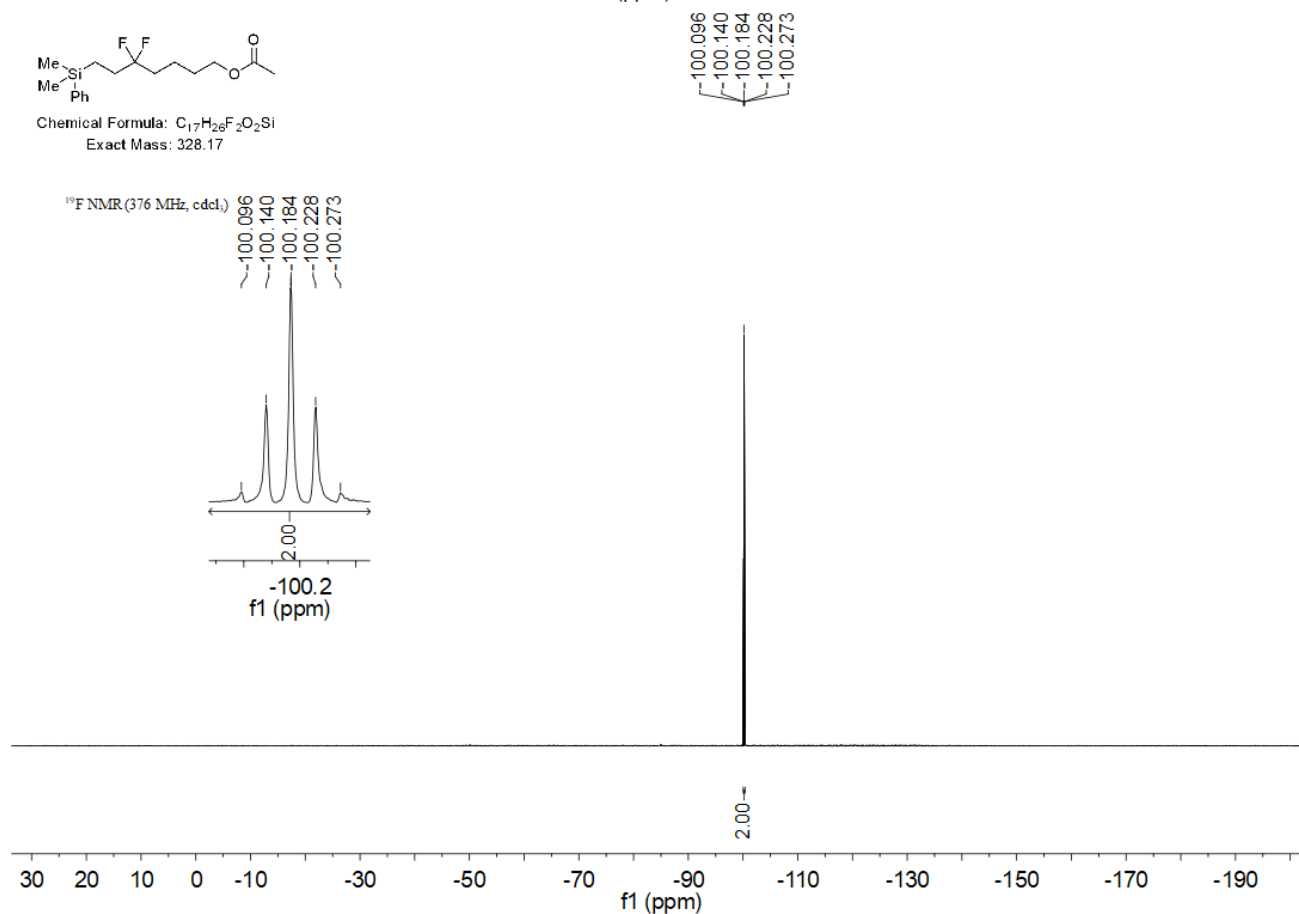

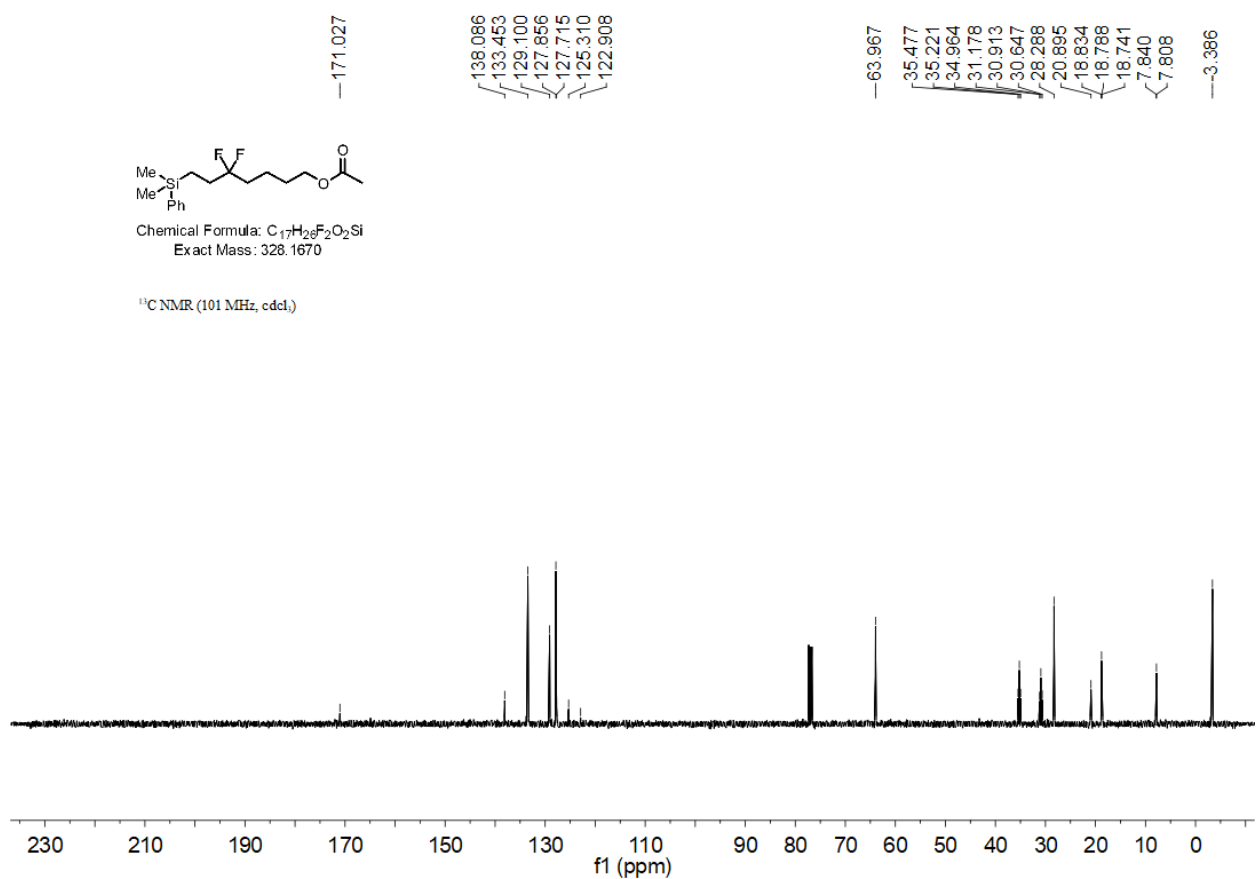

### 8-(Dimethyl(phenyl)silyl)-6,6-difluorooctanenitrile (3f)

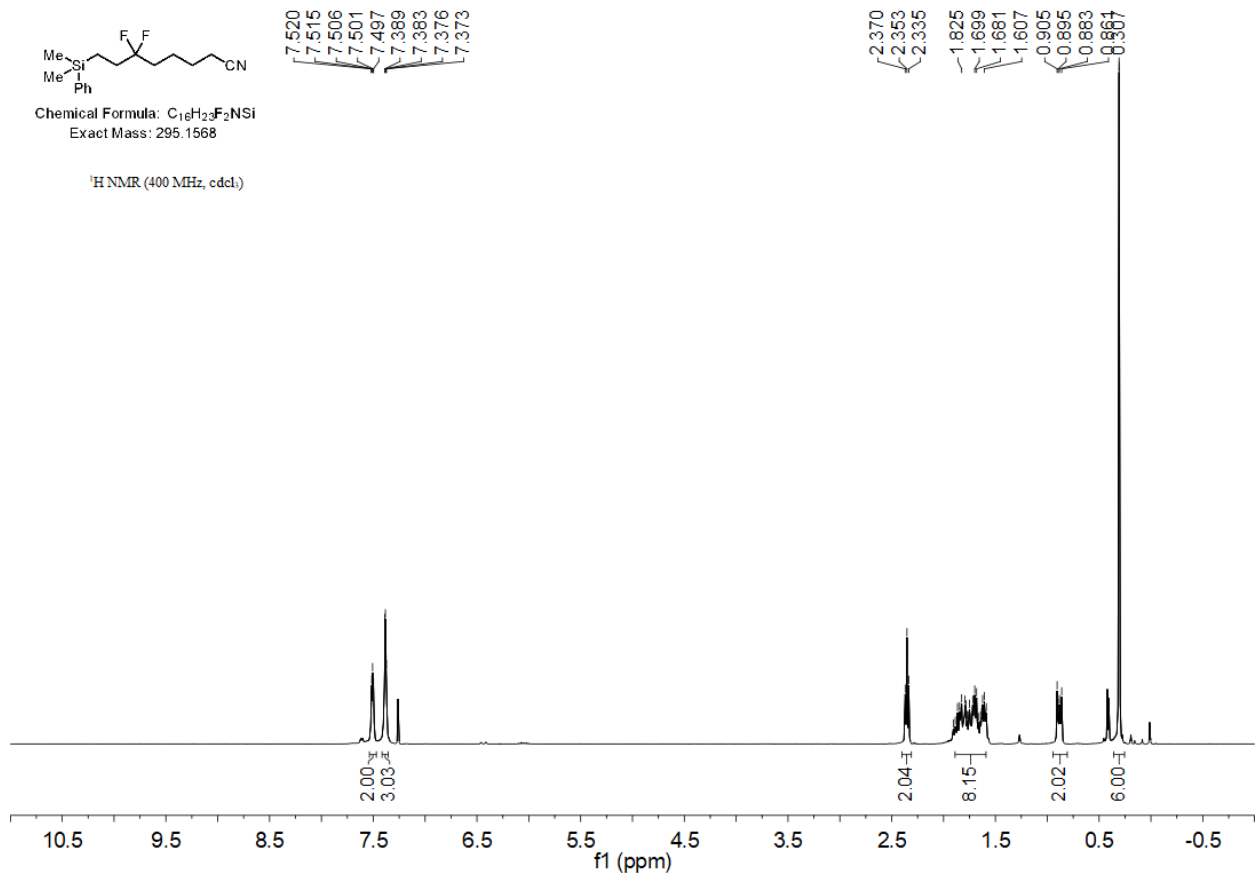

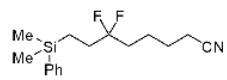

Chemical Formula:  $C_{16}H_{23}F_2NSi$   
Exact Mass: 295.16

$^{19}F$  NMR (376 MHz,  $cdCl_3$ )

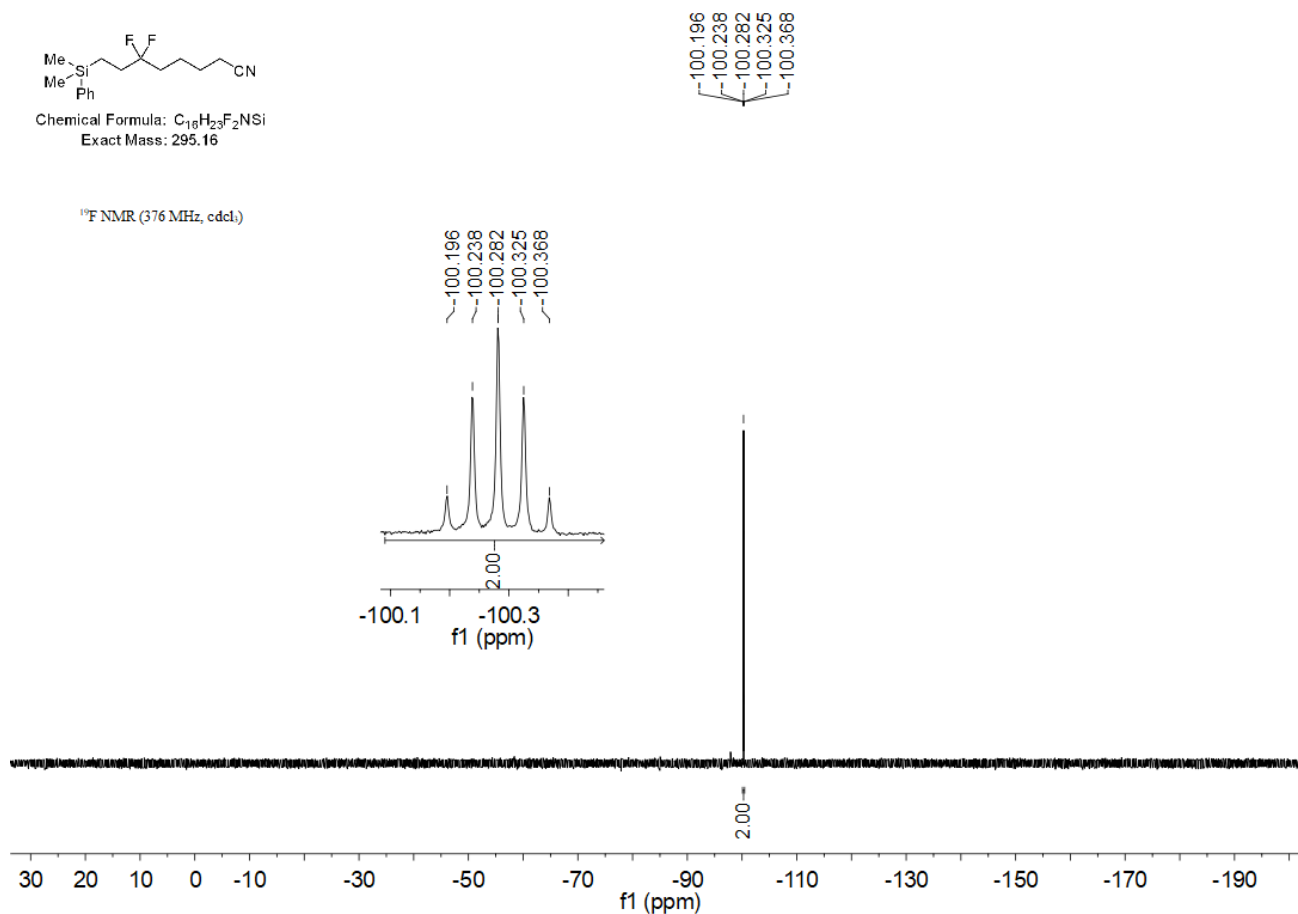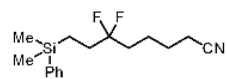

Chemical Formula:  $C_{16}H_{23}F_2NSi$   
Exact Mass: 295.1568

$^{13}C$  NMR (101 MHz,  $cdCl_3$ )

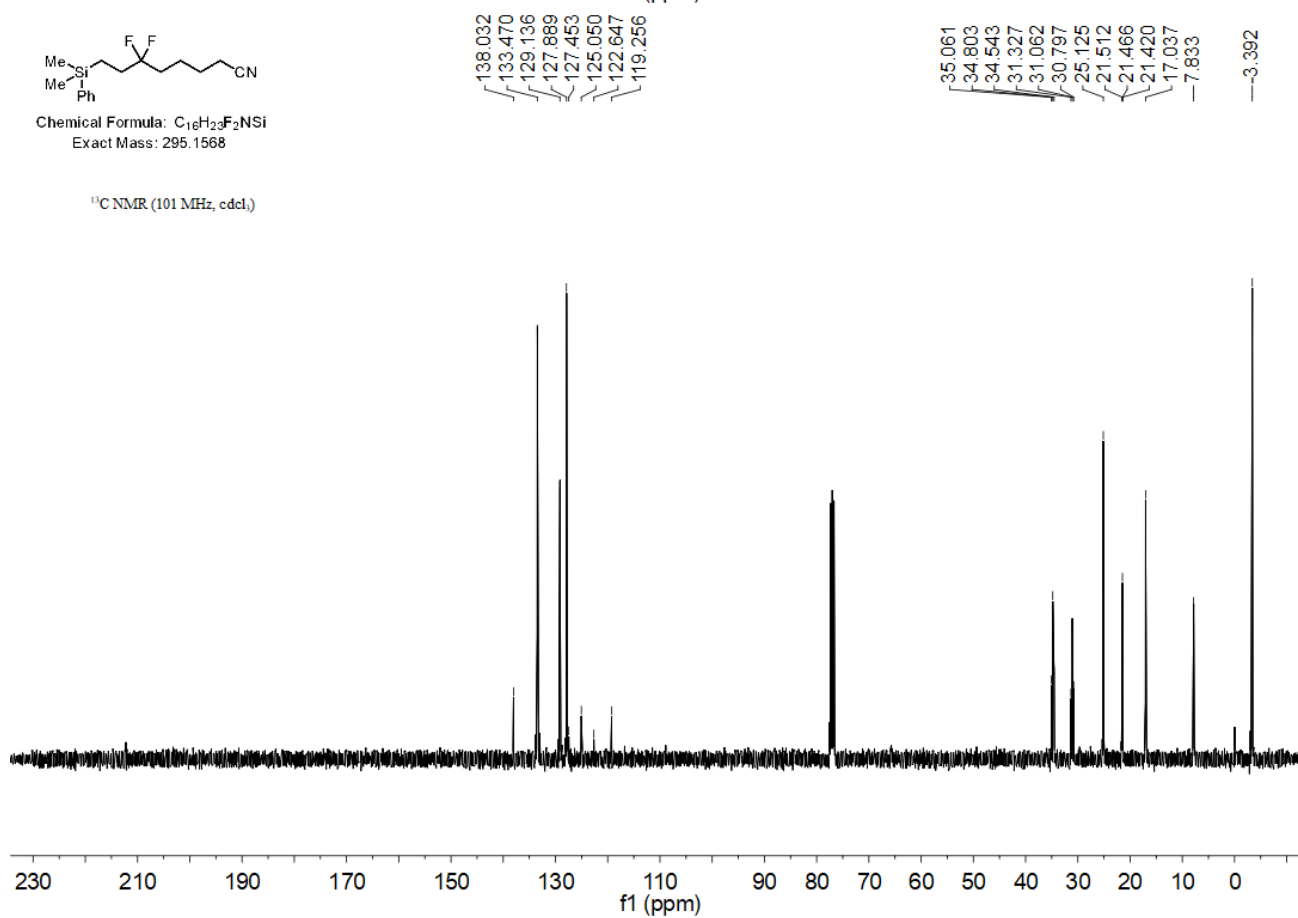

# 6,6-Difluoro-8-(trimethylsilyl)octanenitrile (3g)

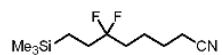

$^1H$  NMR (400 MHz,  $cdCl_3$ )

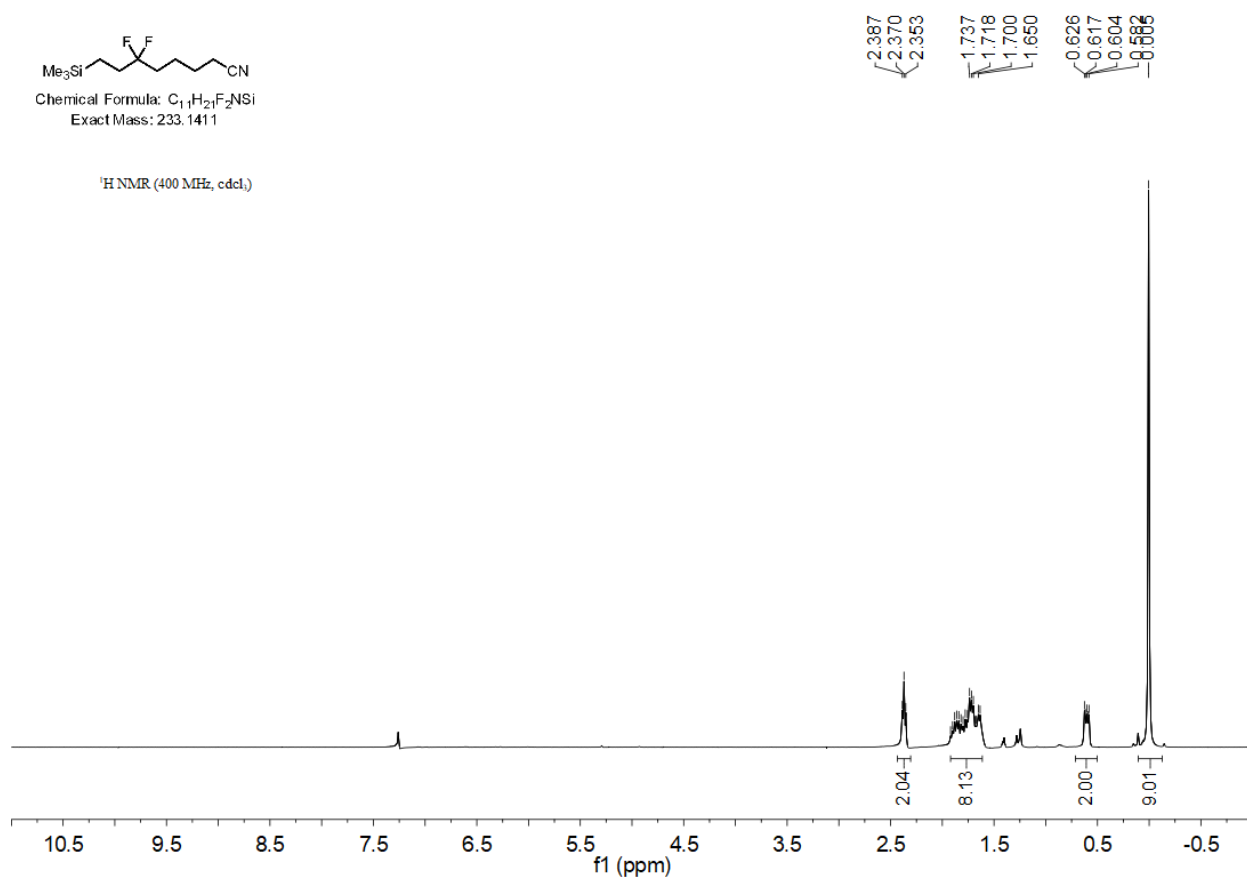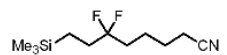

$^{19}F$  NMR (376 MHz,  $cdCl_3$ )

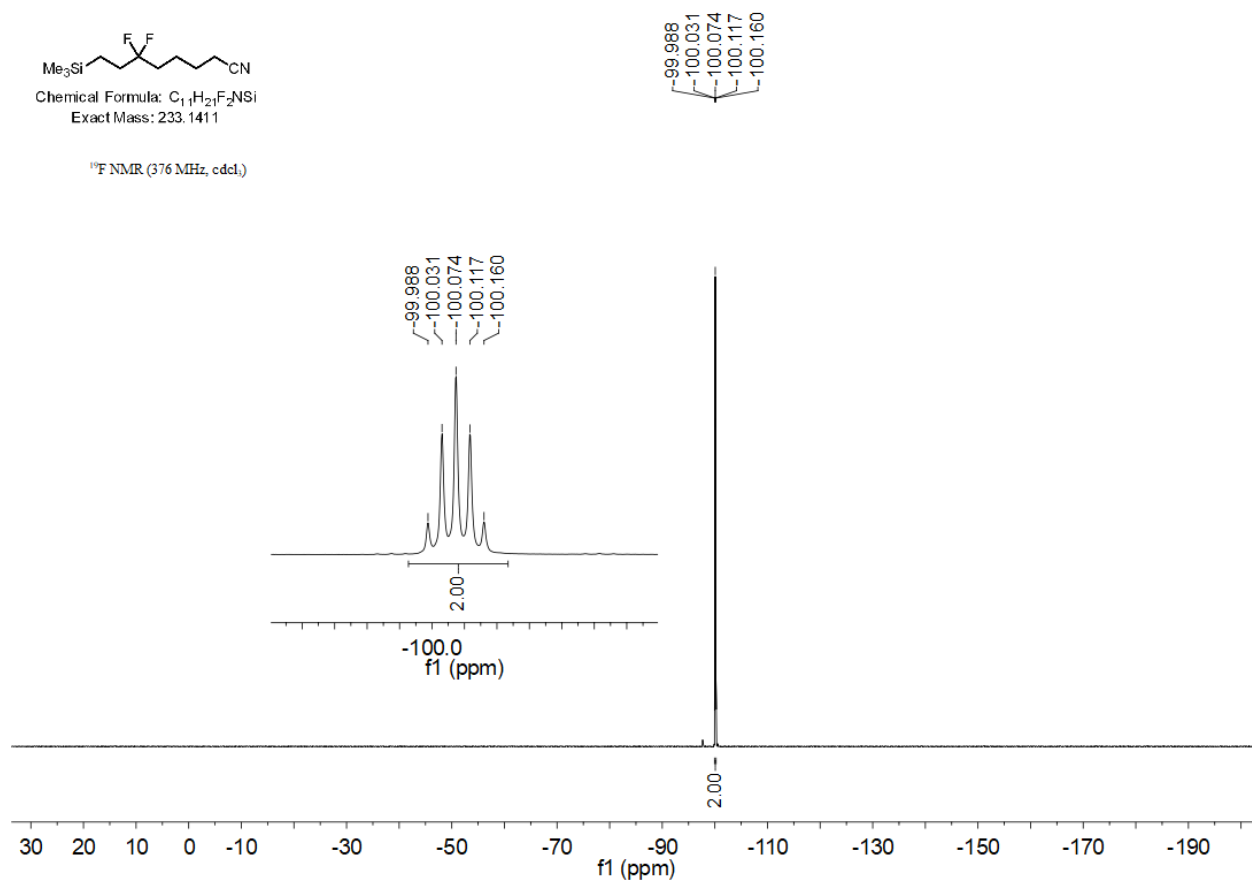



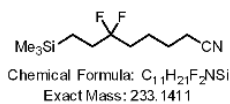

<sup>13</sup>C NMR (101 MHz, cdcl<sub>3</sub>)

~127.602  
 ~125.204  
 ~122.805  
 ~119.282

35.005  
 34.746  
 34.488  
 31.329  
 31.067  
 30.804  
 25.143  
 21.544  
 21.499  
 21.454  
 17.046  
 -8.617  
 -2.061

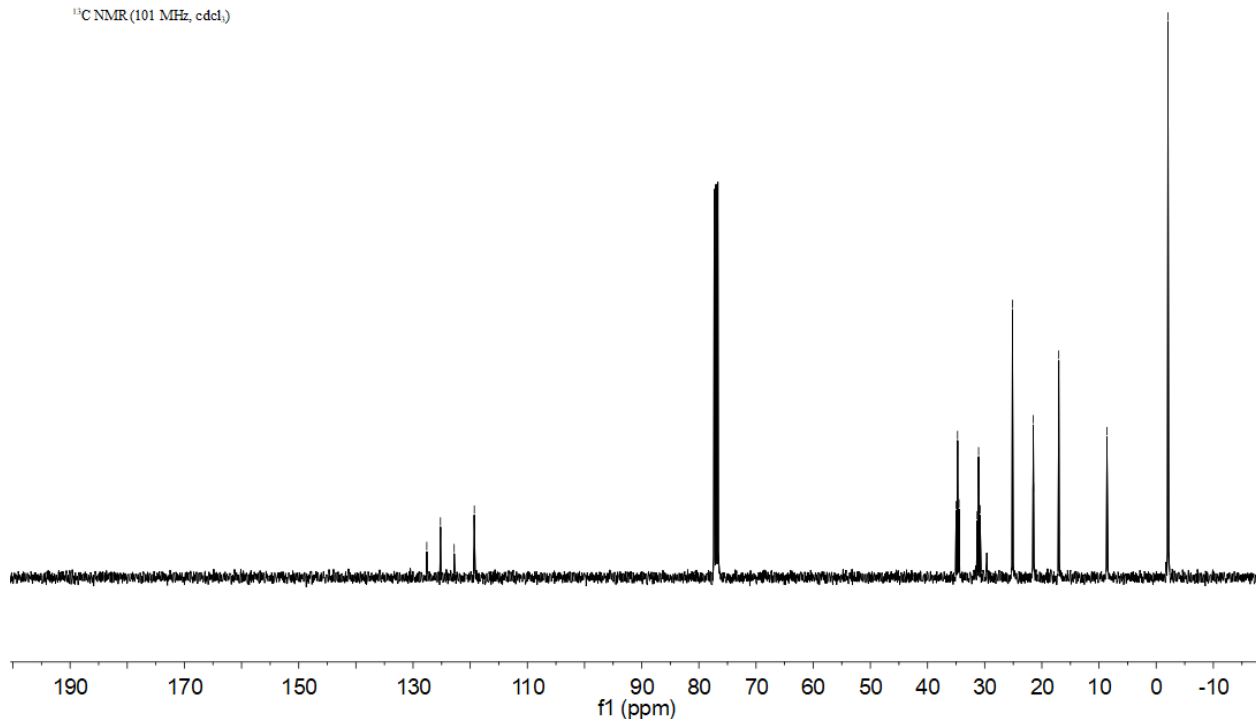

### (8-Chloro-3,3-difluorooctyl)dimethyl(phenyl)silane (3h)

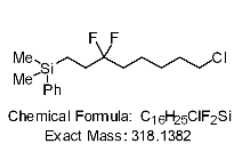

<sup>1</sup>H NMR (400 MHz, cdcl<sub>3</sub>)

7.548  
 7.542  
 7.534  
 7.528  
 7.524  
 7.409  
 7.403  
 7.397  
 7.393  
 7.385

3.569  
 3.552  
 3.536

1.815  
 1.805  
 1.801  
 1.796  
 1.782  
 1.503  
 1.494  
 1.484  
 1.475

0.933  
 0.911  
 0.889

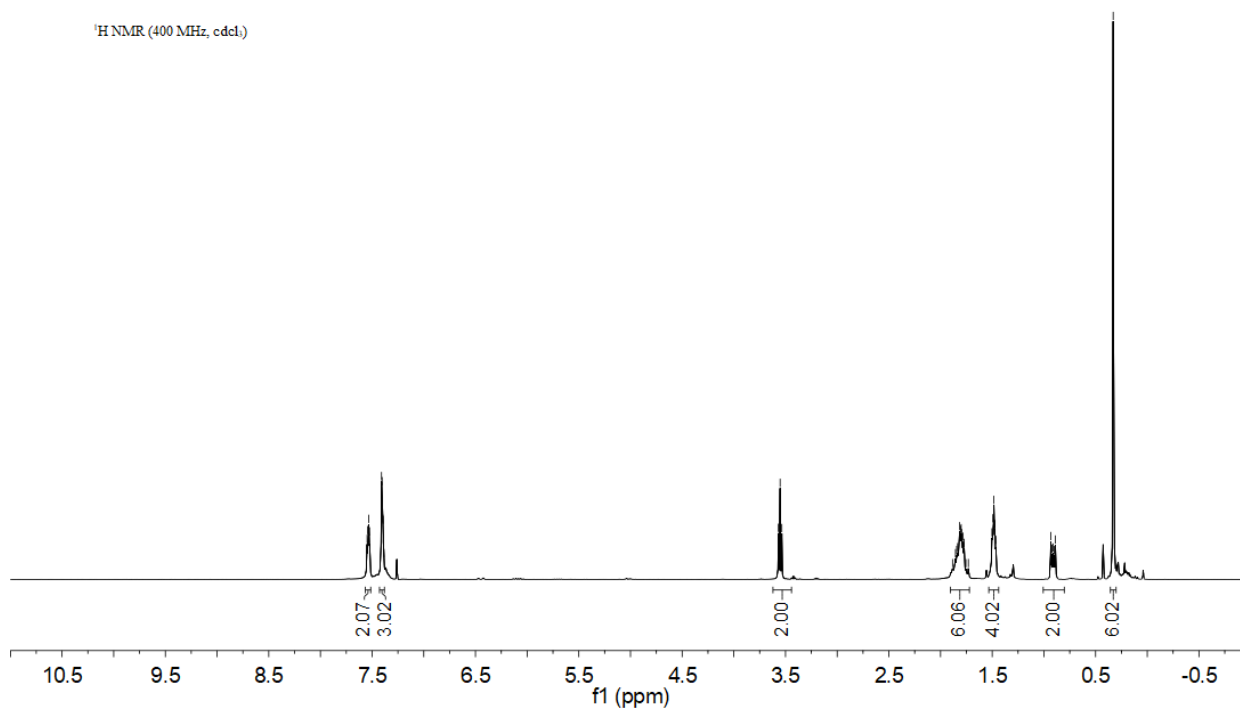

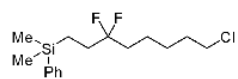

$^{19}F$  NMR (376 MHz,  $cdCl_3$ )

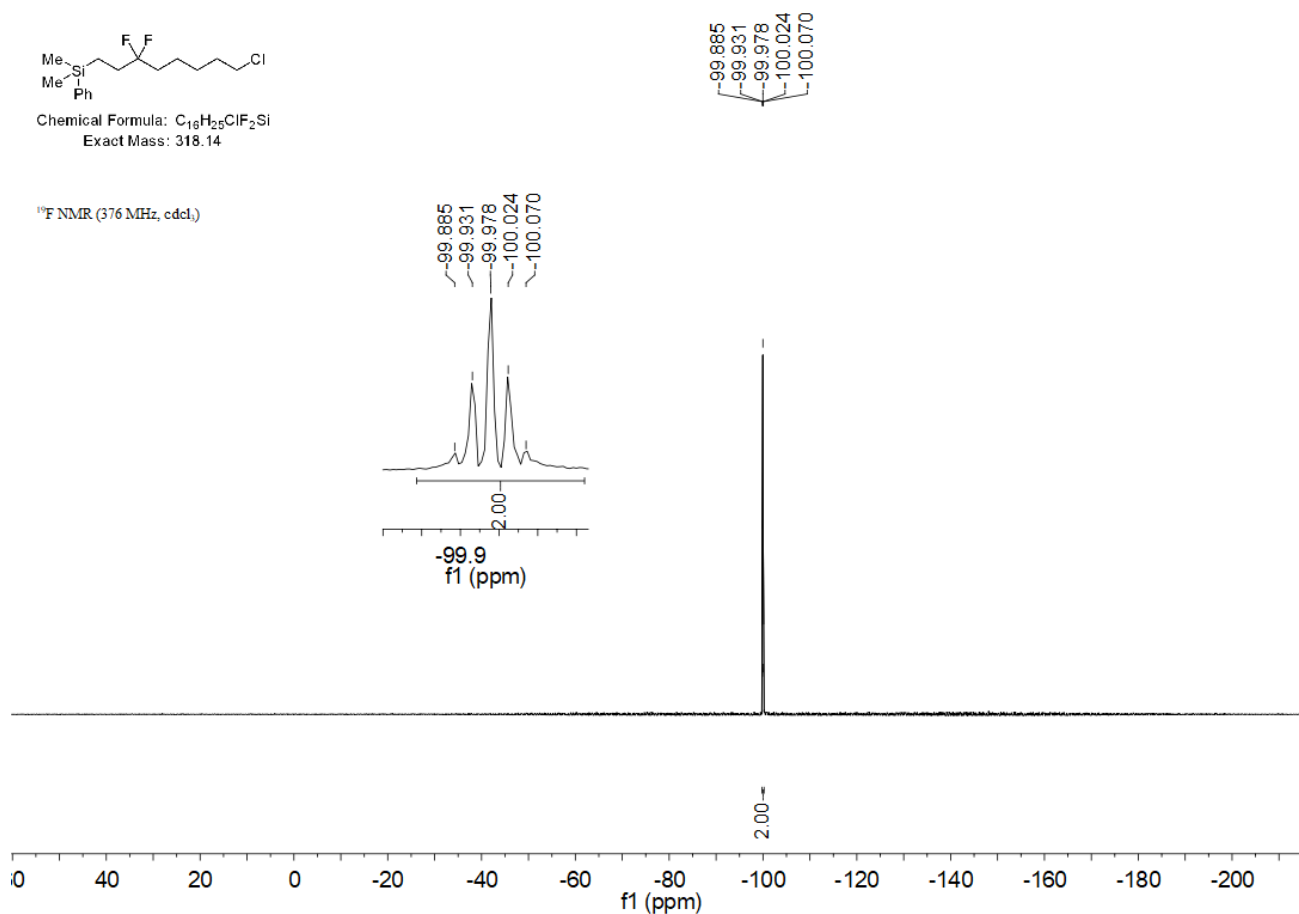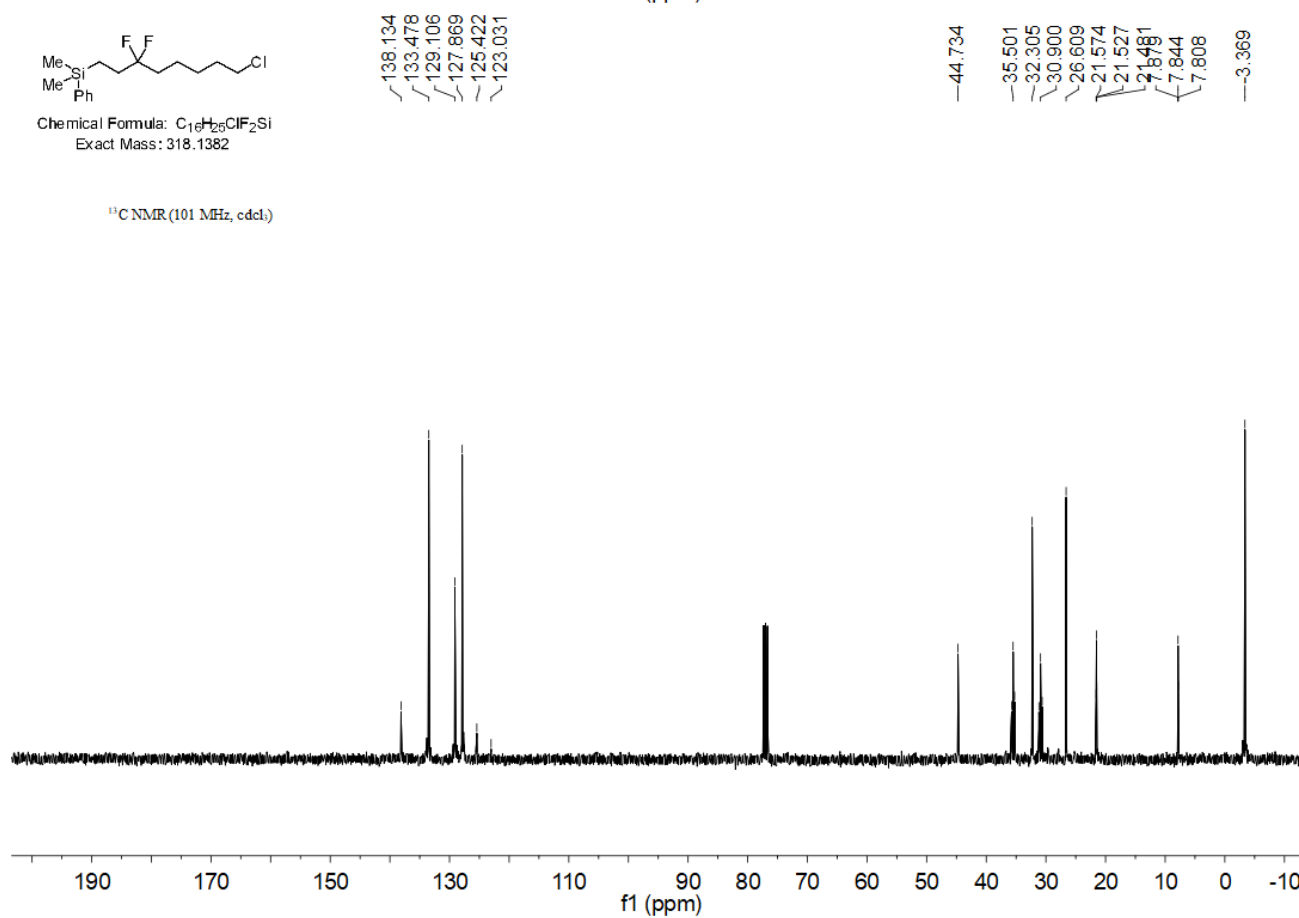

# 4-(Dimethyl(phenyl)silyl)-2,2-difluorobutyl benzoate (3i)

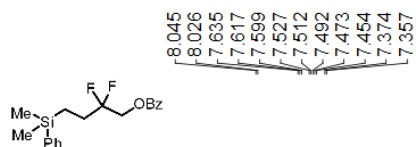

$^1H$  NMR (400 MHz,  $cdCl_3$ )

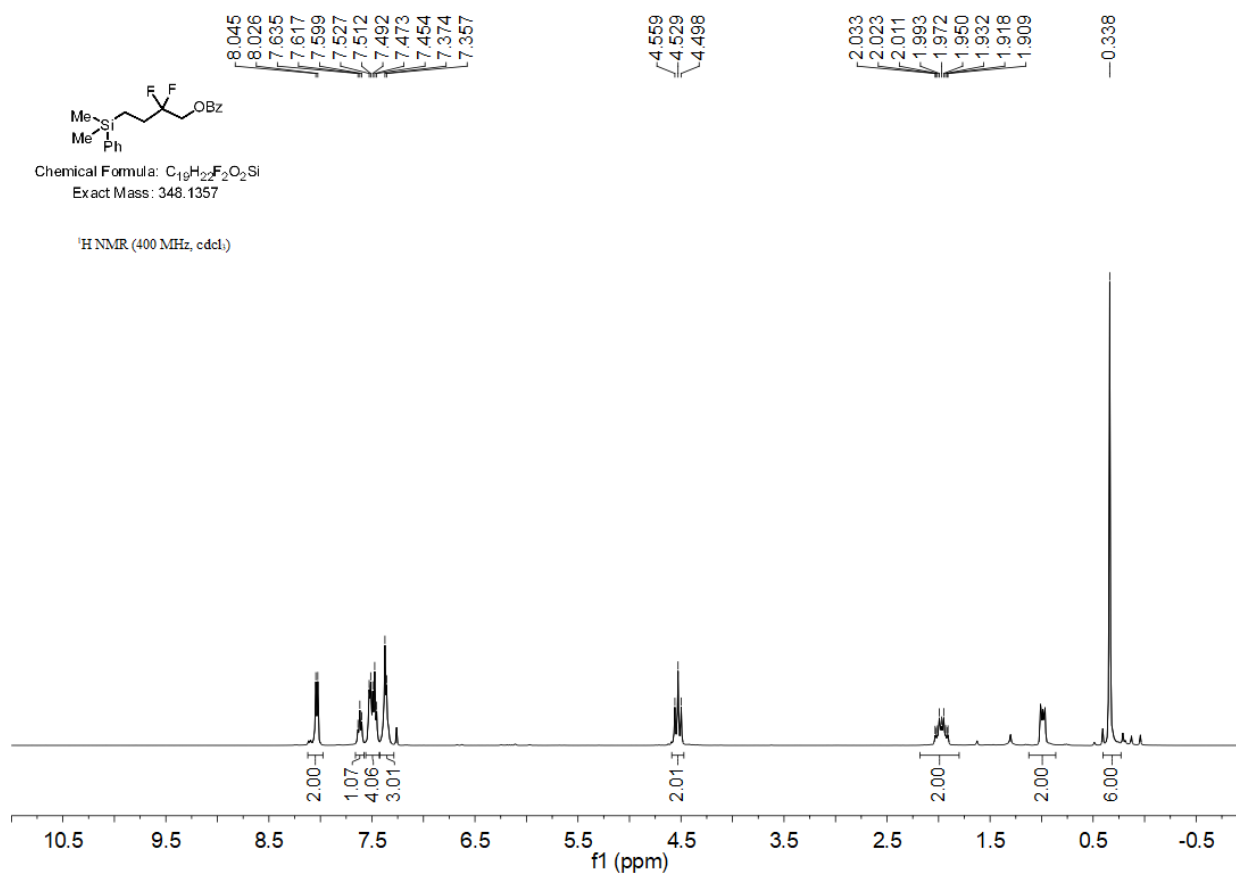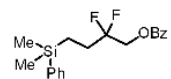

$^{19}F$  NMR (376 MHz,  $cdCl_3$ )

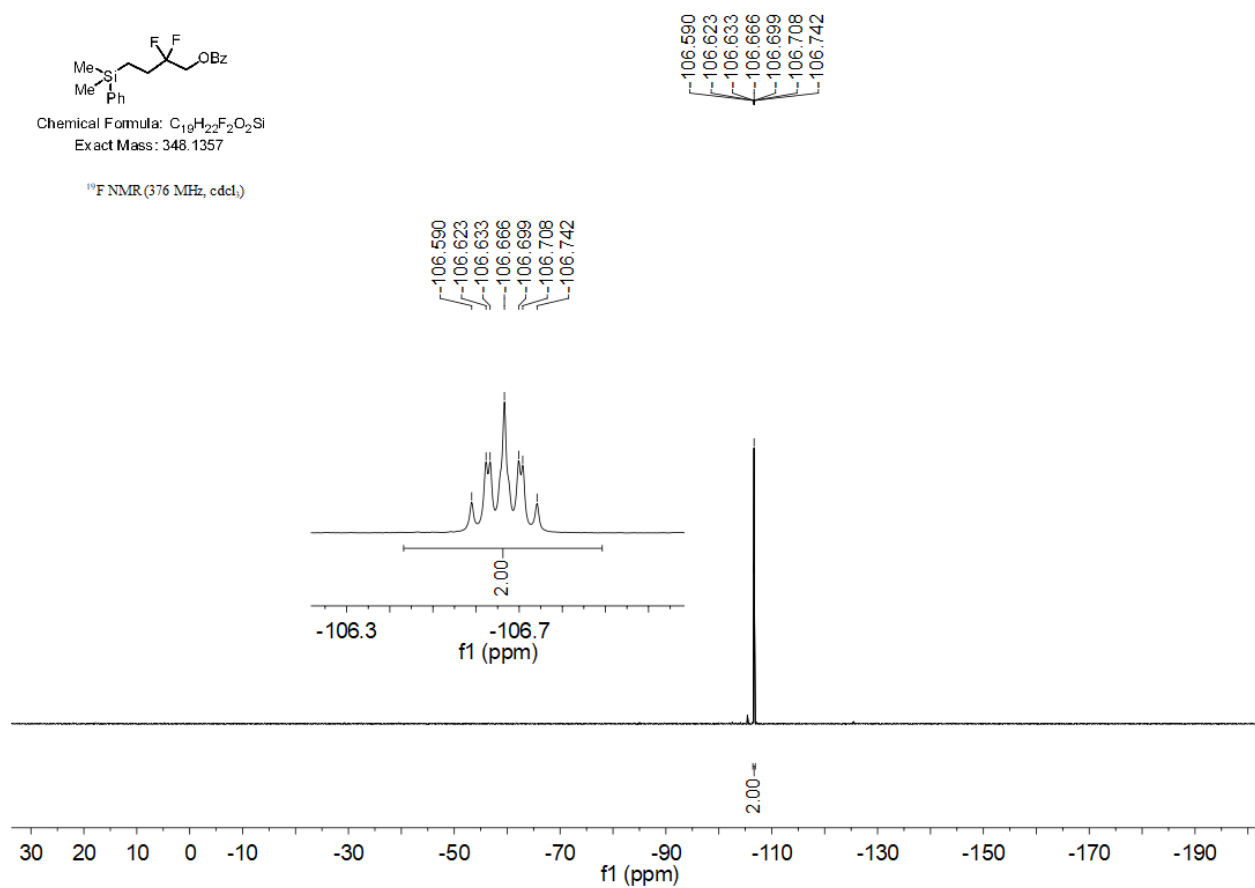

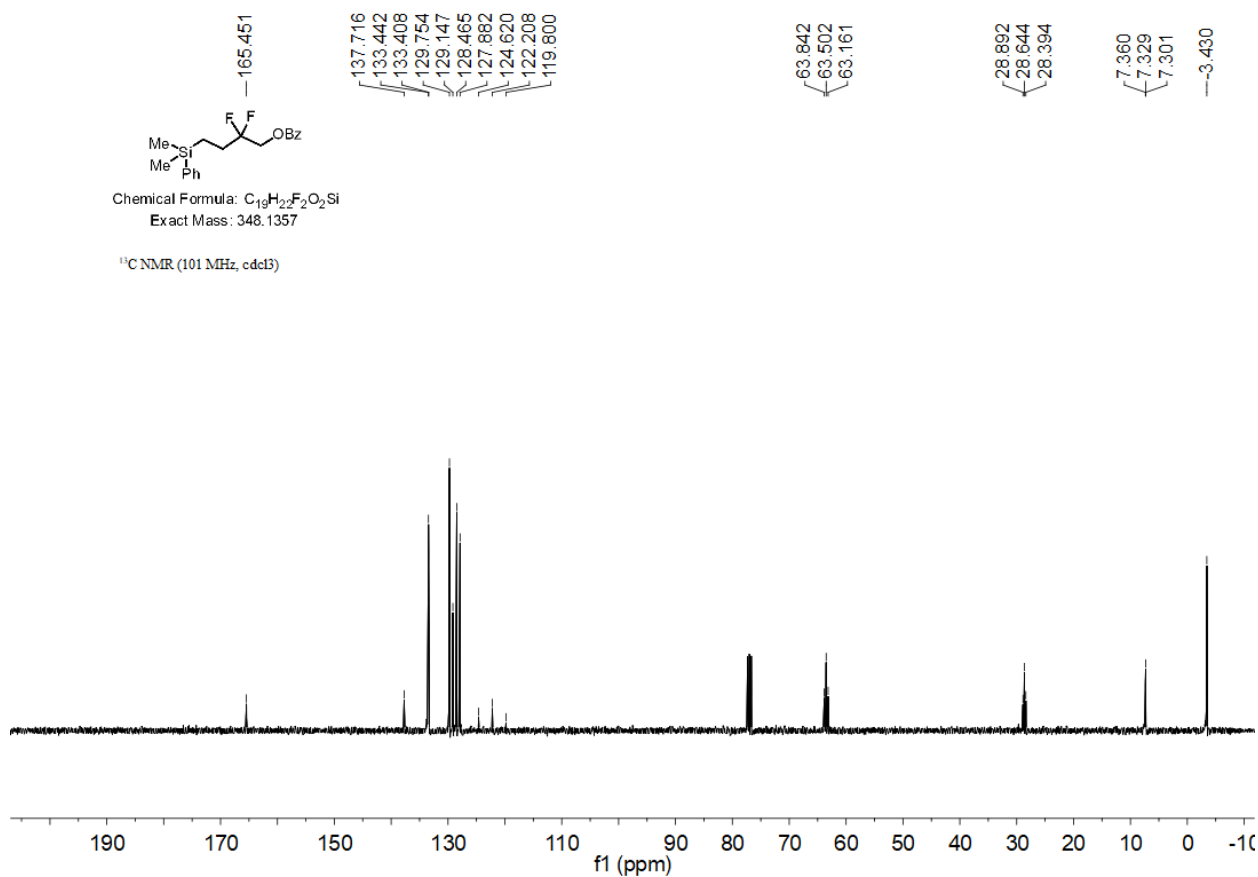

## 2,2-Difluoro-4-(trimethylsilyl)butyl benzoate (3j)

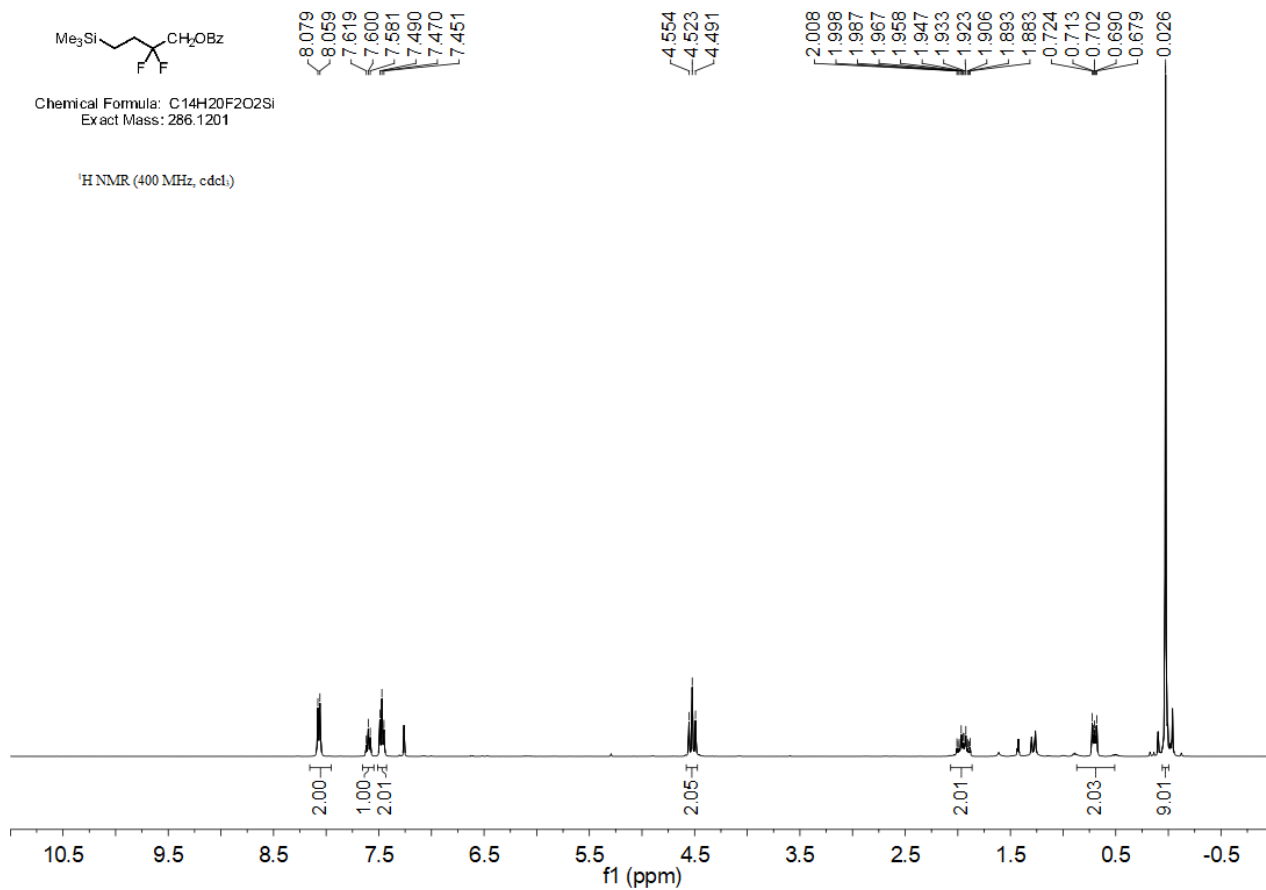

Chemical Formula:  $C_{14}H_{20}F_2O_2Si$   
Exact Mass: 286.12

<sup>19</sup>F NMR (376 MHz, cdcl<sub>3</sub>)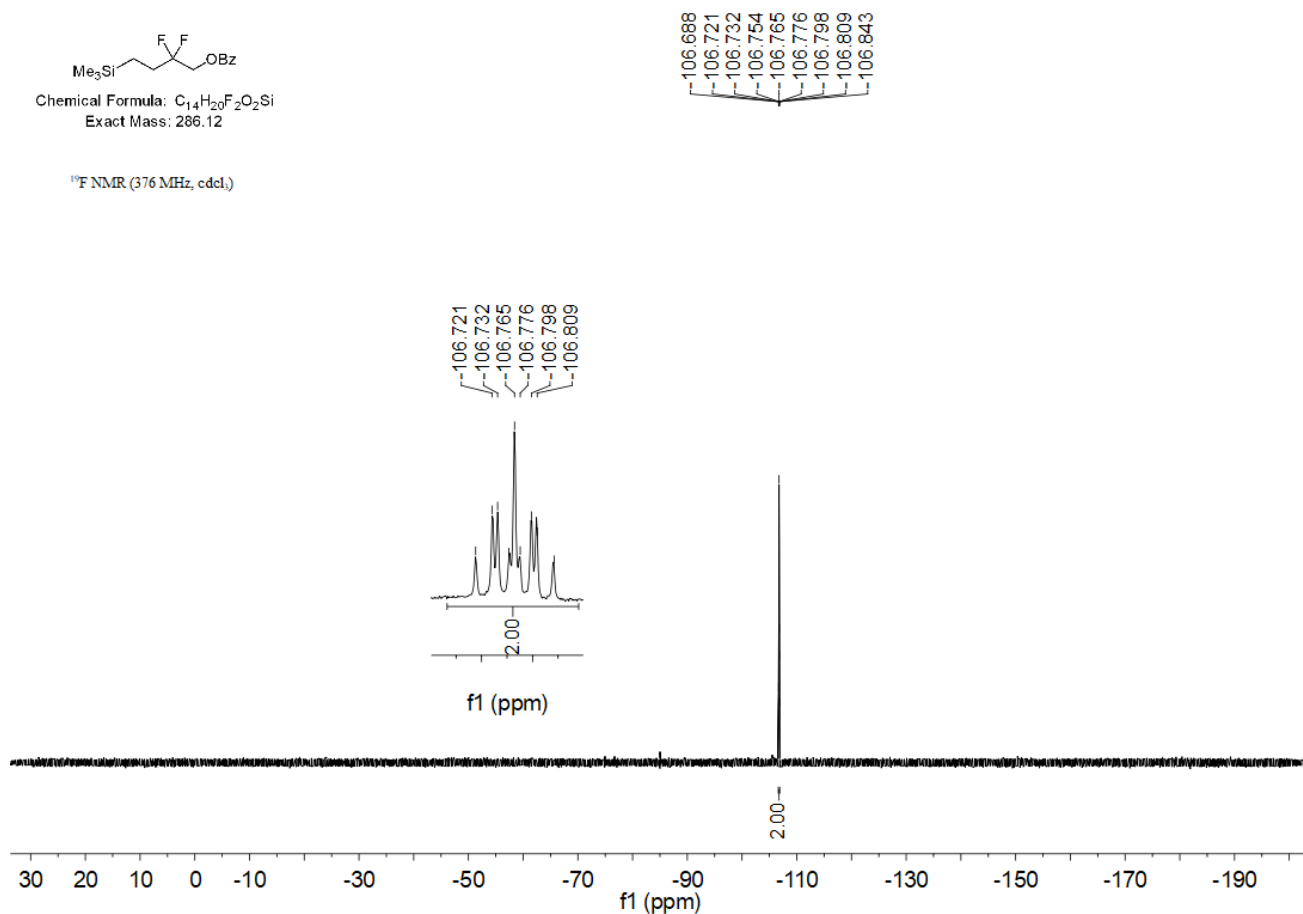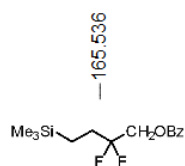

Chemical Formula: C<sub>14</sub>H<sub>20</sub>F<sub>2</sub>O<sub>2</sub>Si  
Exact Mass: 286.1201

<sup>13</sup>C NMR (101 MHz, cdcl<sub>3</sub>)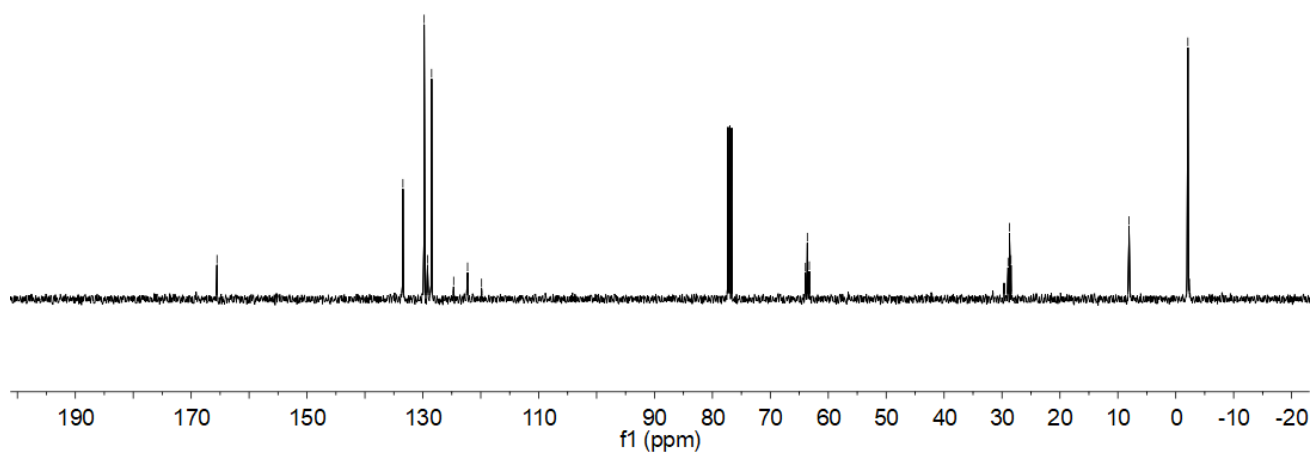

# 7-(Dimethyl(phenyl)silyl)-5,5-difluoroheptyl acetate (3k)

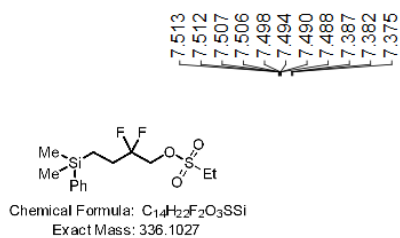

<sup>1</sup>H NMR (400 MHz, cdcl<sub>3</sub>)

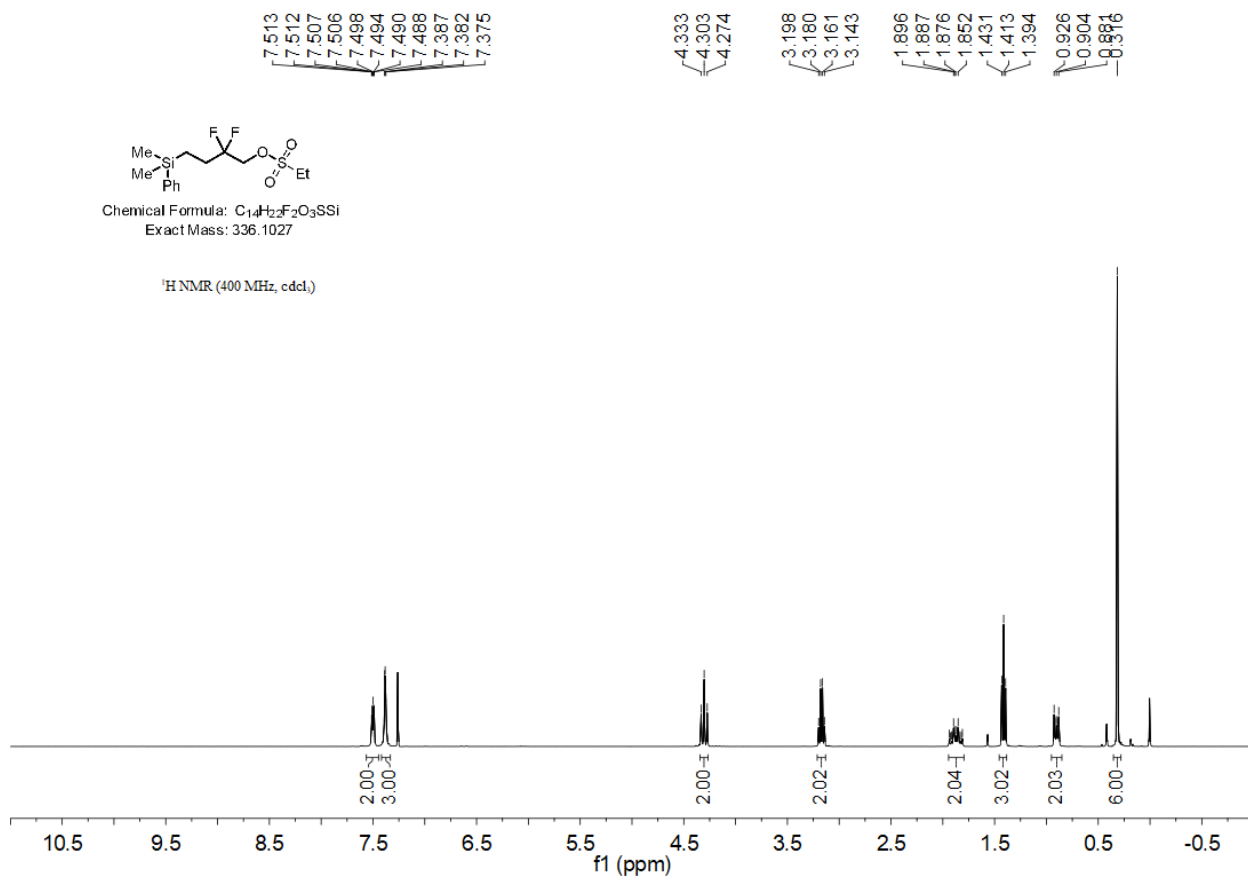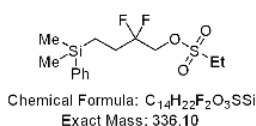

<sup>19</sup>F NMR (376 MHz, cdcl<sub>3</sub>)

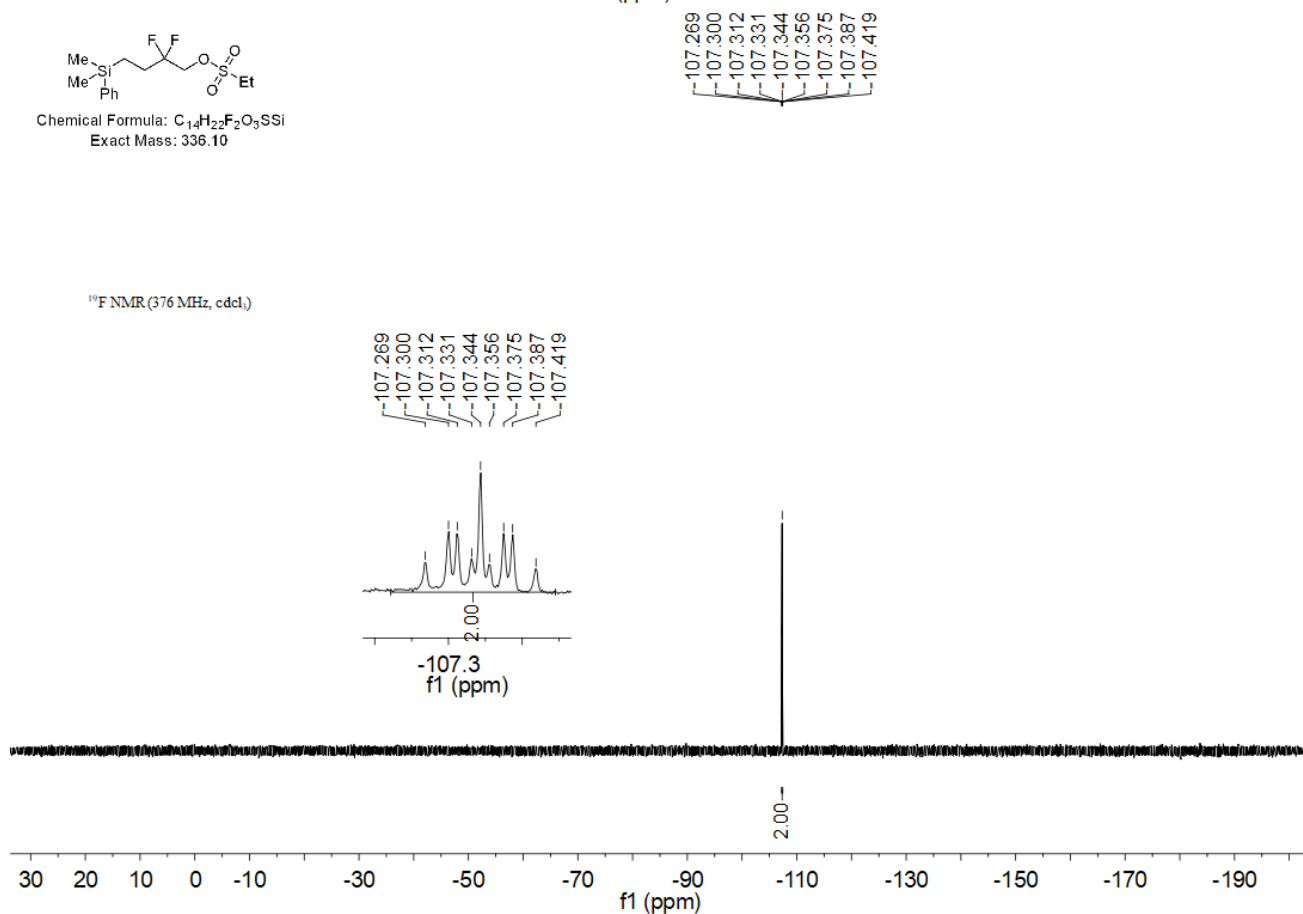

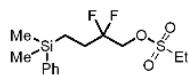

Chemical Formula:  $C_{14}H_{22}F_2O_3Si$   
Exact Mass: 336.1027

$^{13}C$  NMR (101 MHz,  $cdCl_3$ )

137.579  
133.477  
129.260  
127.953  
123.649  
121.223  
118.801

67.214  
66.866  
66.517

45.502

28.541  
28.295  
28.051

8.054  
7.114  
7.085  
7.054  
-3.446

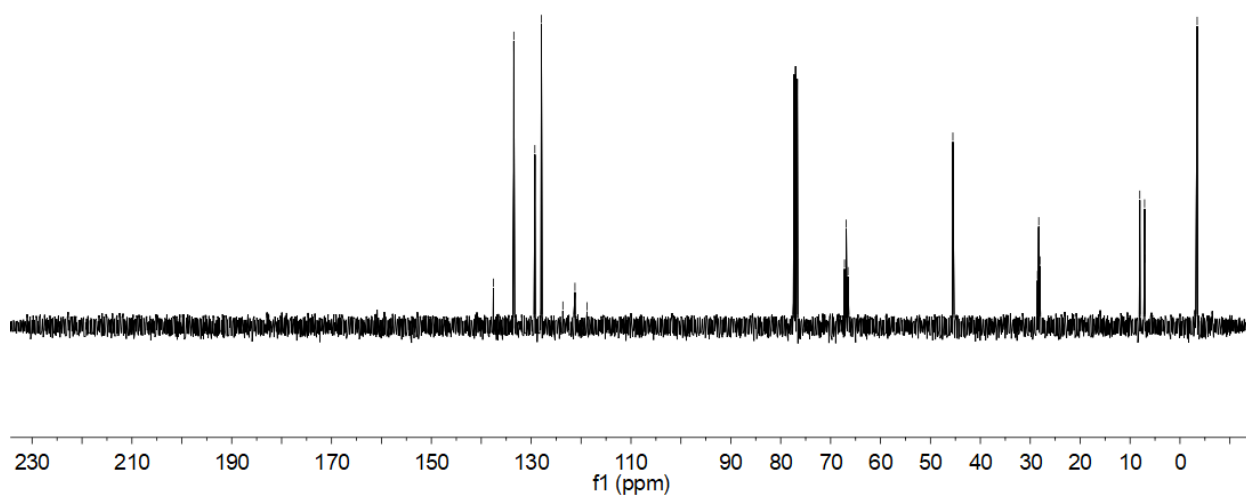

## 8-(Dimethyl(phenyl)silyl)-6,6-difluorooctyl benzoate (3l)

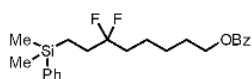

Chemical Formula:  $C_{23}H_{30}F_2O_2Si$   
Exact Mass: 404.1983

$^1H$  NMR (400 MHz,  $cdCl_3$ )

8.057  
8.038  
7.580  
7.562  
7.545  
7.509  
7.501  
7.463  
7.444  
7.426  
7.377  
7.372

4.339  
4.322  
4.306

1.879  
1.856  
1.830  
1.816  
1.790  
1.782  
1.768  
1.749  
1.580  
1.537  
1.529  
1.502  
1.495

0.905  
0.884  
0.866

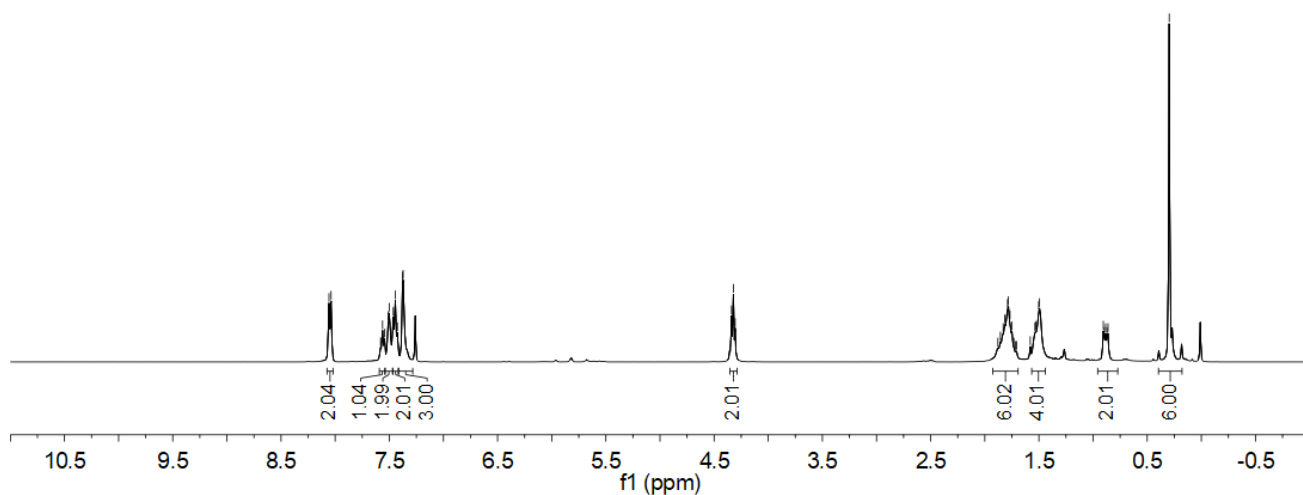

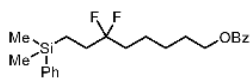

Chemical Formula:  $C_{23}H_{30}F_2O_2Si$   
Exact Mass: 404.1983

99.837  
99.880  
99.923  
99.966  
100.010

$^{19}F$  NMR (376 MHz,  $cdCl_3$ )

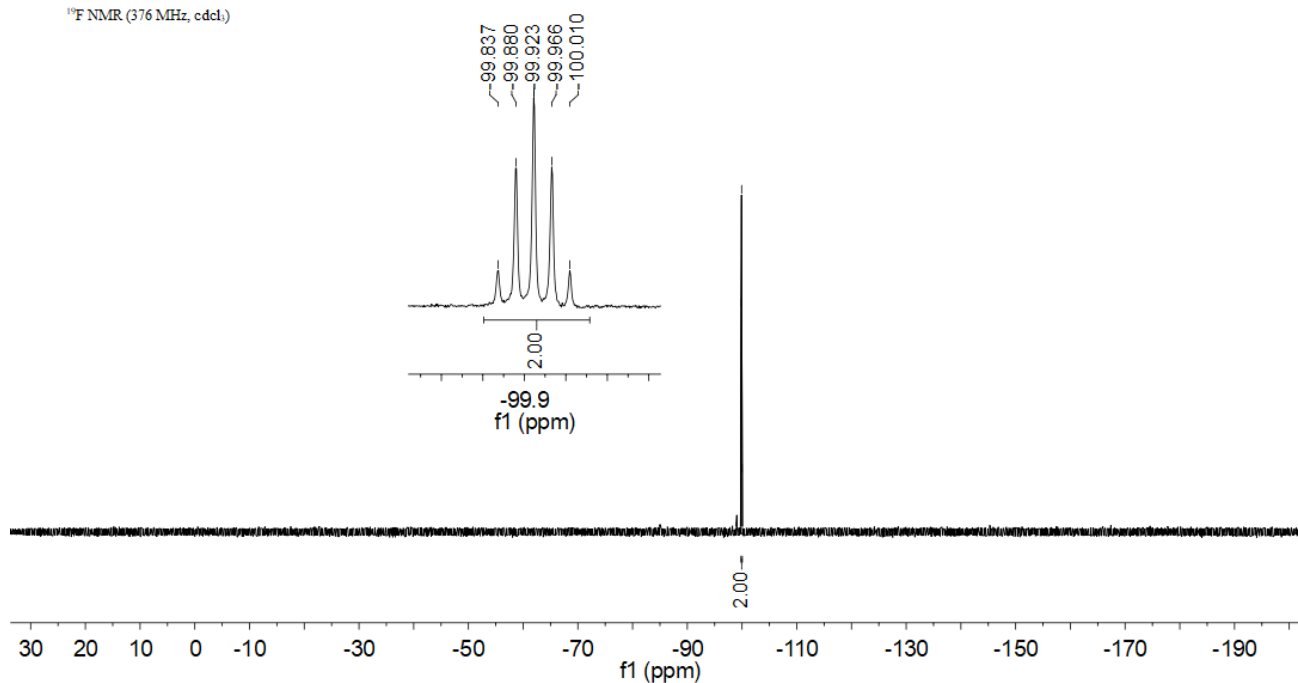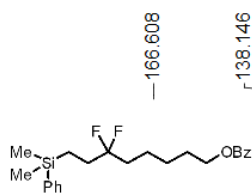

Chemical Formula:  $C_{23}H_{30}F_2O_2Si$   
Exact Mass: 404.1983

$^{13}C$  NMR (126 MHz,  $CDCl_3$ )

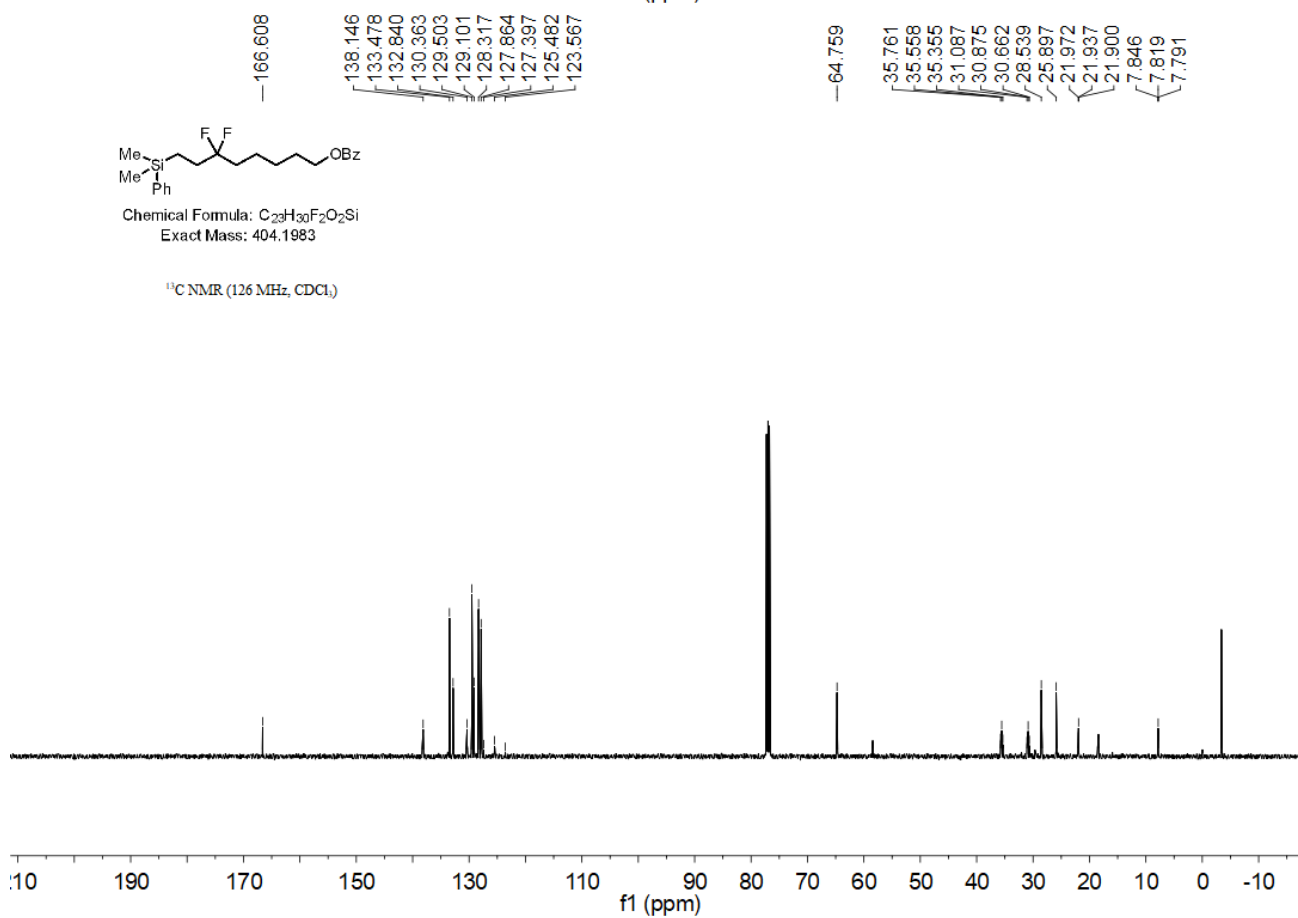



### (3-Cyclohexyl-3,3-difluoropropyl)dimethyl(phenyl)silane (3m)

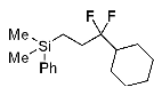

Chemical Formula:  $C_{17}H_{26}F_2Si$   
Exact Mass: 296.1772

$^1H$  NMR (400 MHz,  $cdCl_3$ )

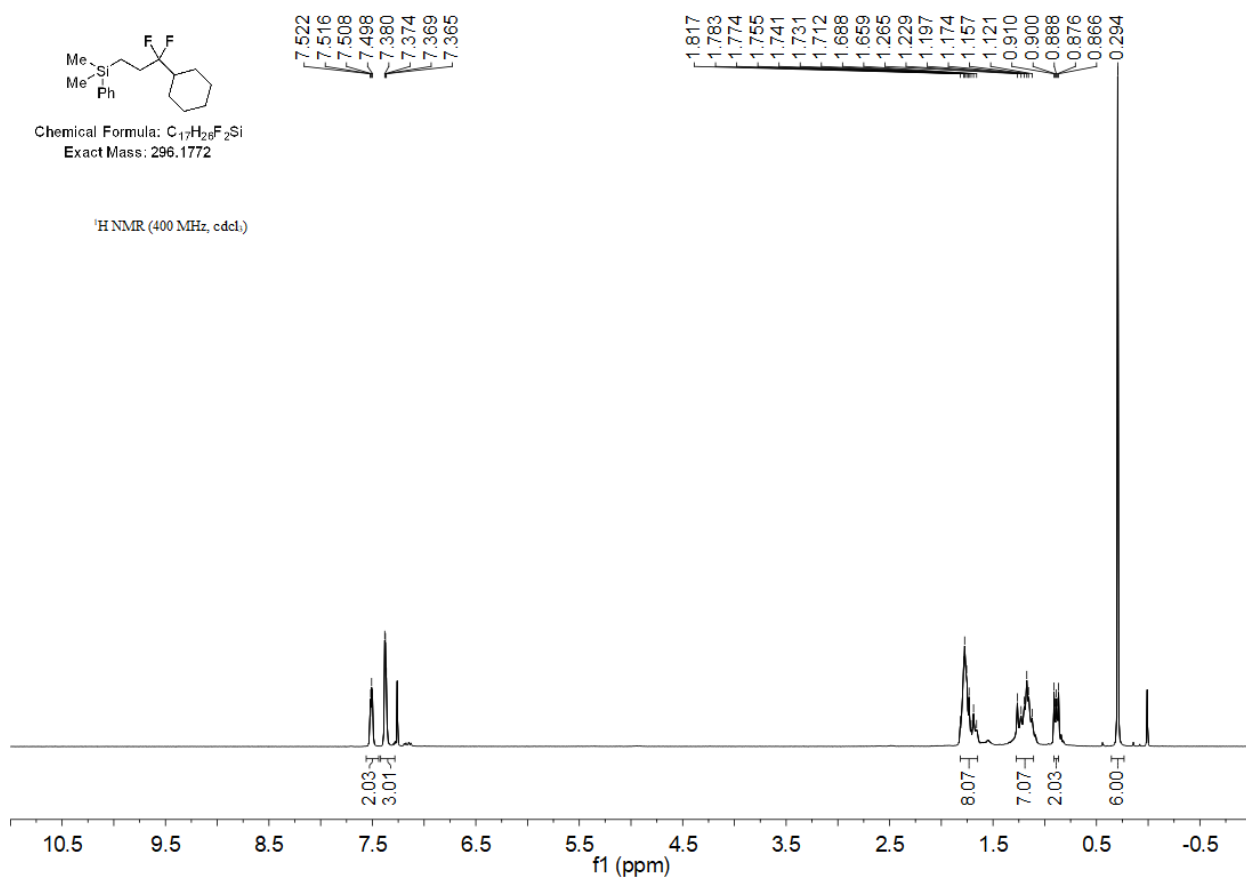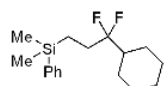

Chemical Formula:  $C_{17}H_{26}F_2Si$   
Exact Mass: 296.1772

$^{19}F$  NMR (376 MHz,  $cdCl_3$ )

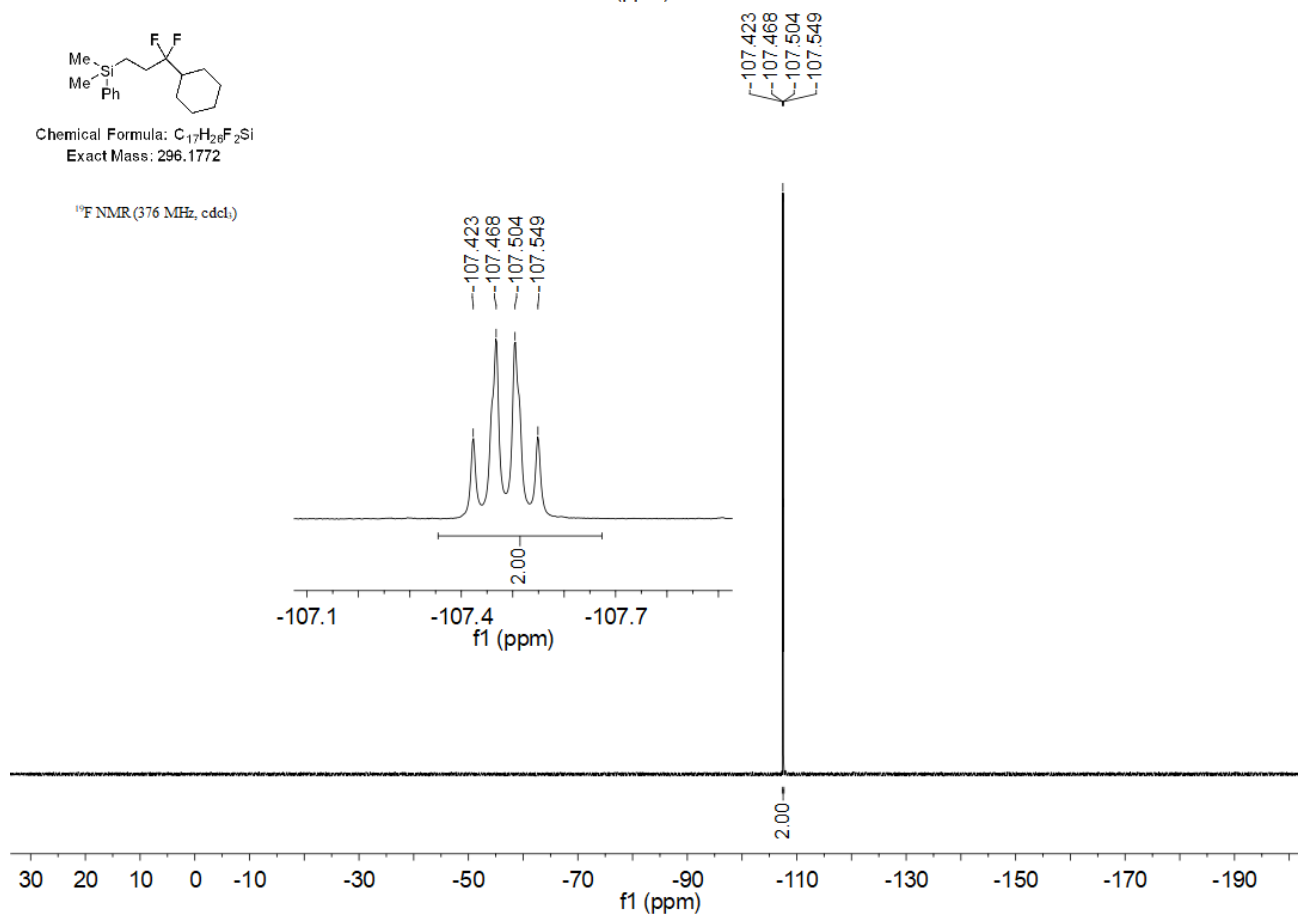

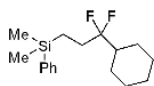

Chemical Formula:  $C_{17}H_{26}F_2Si$   
Exact Mass: 296.1772

$^{13}C$  NMR (126 MHz,  $CDCl_3$ )

138.344  
133.504  
129.060  
128.103  
127.855  
126.180  
124.306

43.299  
43.109  
42.919  
28.420  
25.971  
25.753  
25.701  
25.665  
25.630  
7.097  
-3.309

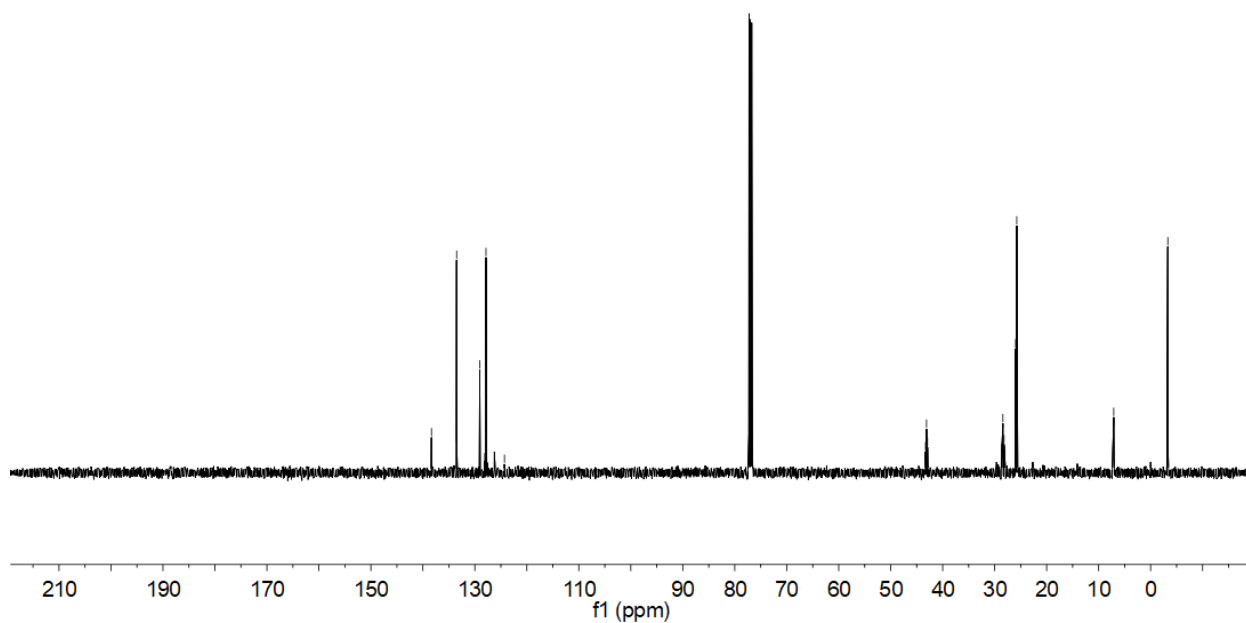

### Mesityl 4-(dimethyl(phenyl)silyl)-2,2-difluorobutanoate (3n)

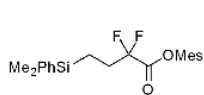

Chemical Formula:  $C_{21}H_{26}F_2O_2Si$   
Exact Mass: 376.17

$^1H$  NMR (400 MHz,  $cdcl_3$ )

7.577  
7.572  
7.563  
7.554  
7.435  
7.429  
7.422  
6.932

2.321  
2.290  
2.271  
2.262  
2.250  
2.236  
2.227  
2.210  
2.196  
2.187  
2.178  
2.140  
1.086  
1.077  
1.065  
1.052  
1.042  
0.398

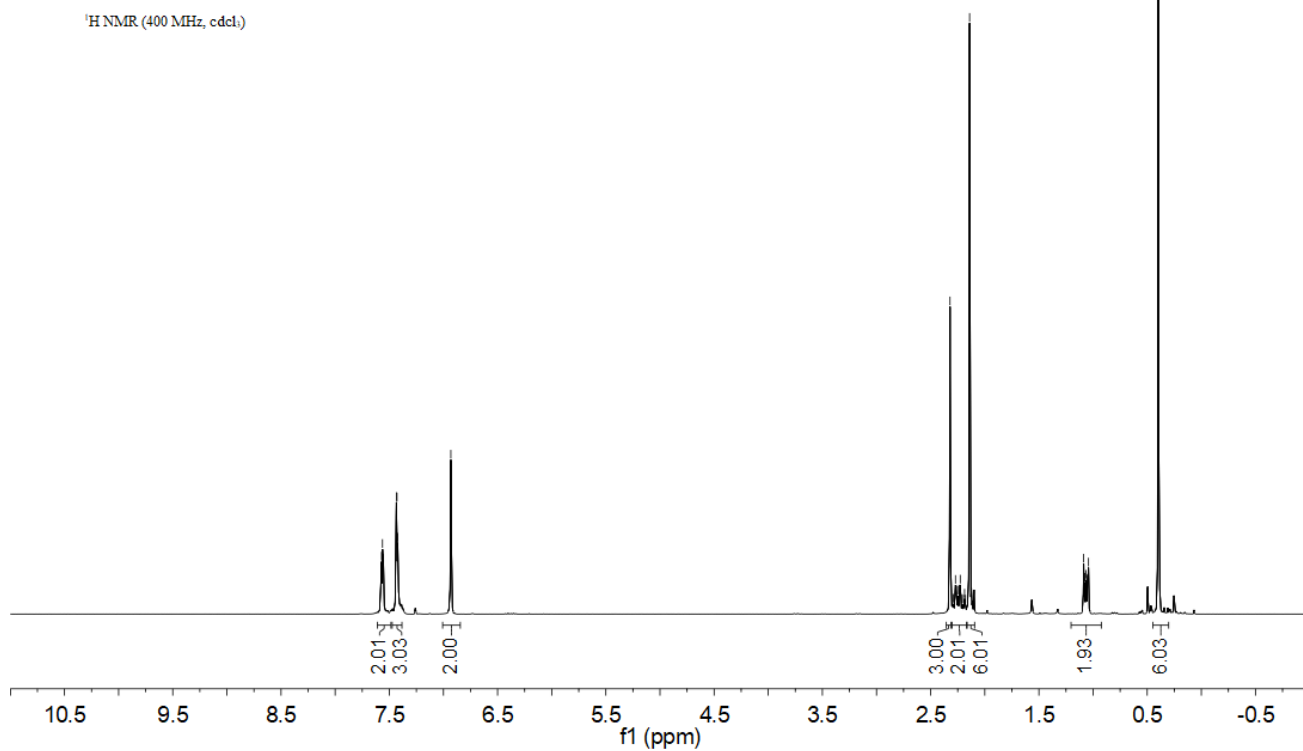

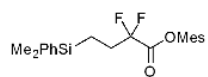

Chemical Formula:  $C_{21}H_{26}F_2O_2Si$   
Exact Mass: 376.17

$^{19}F$  NMR (376 MHz,  $cdCl_3$ )

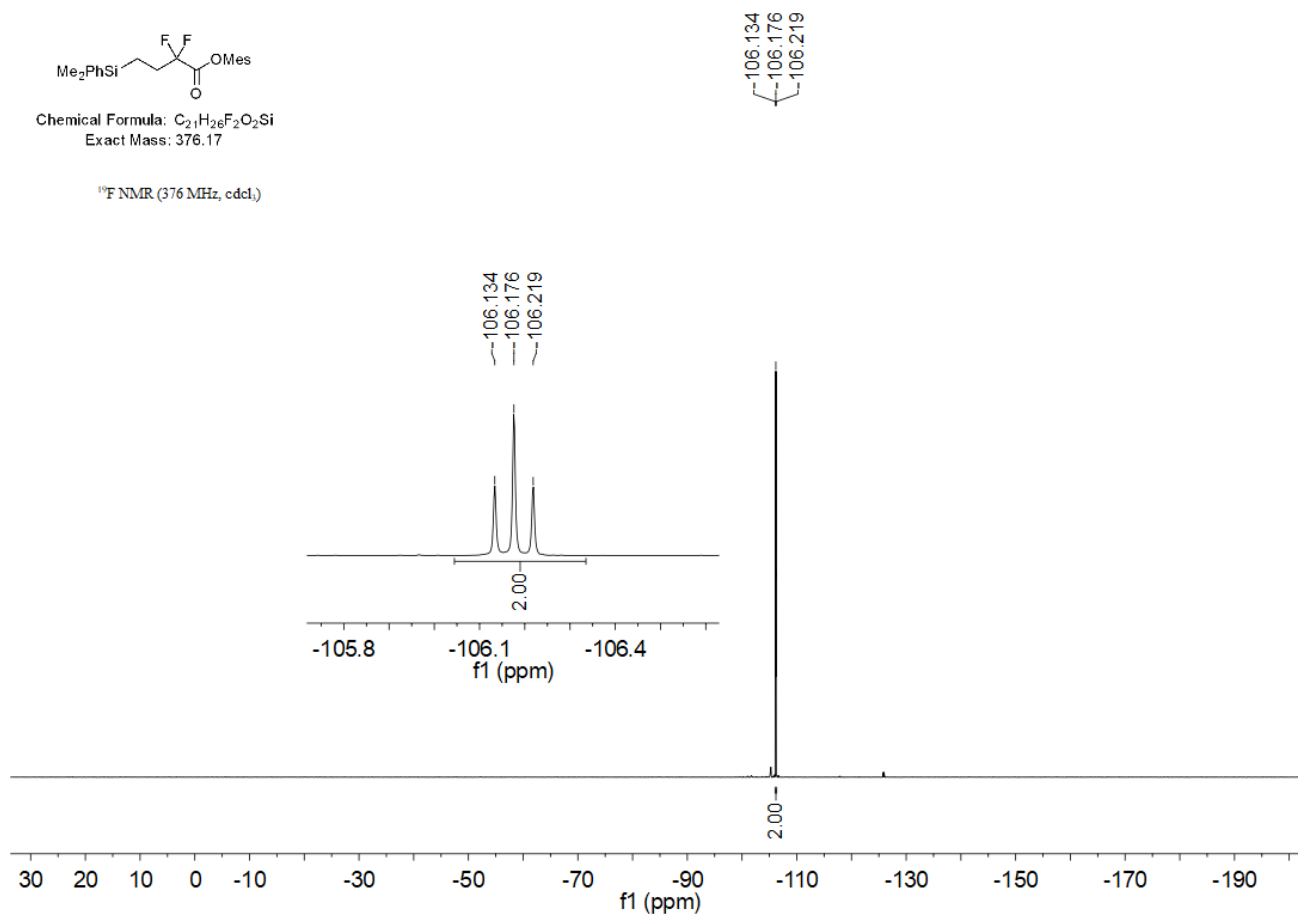

Chemical Formula:  $C_{21}H_{26}F_2O_2Si$   
Exact Mass: 376.17

$^{13}C$  NMR (101 MHz,  $cdCl_3$ )

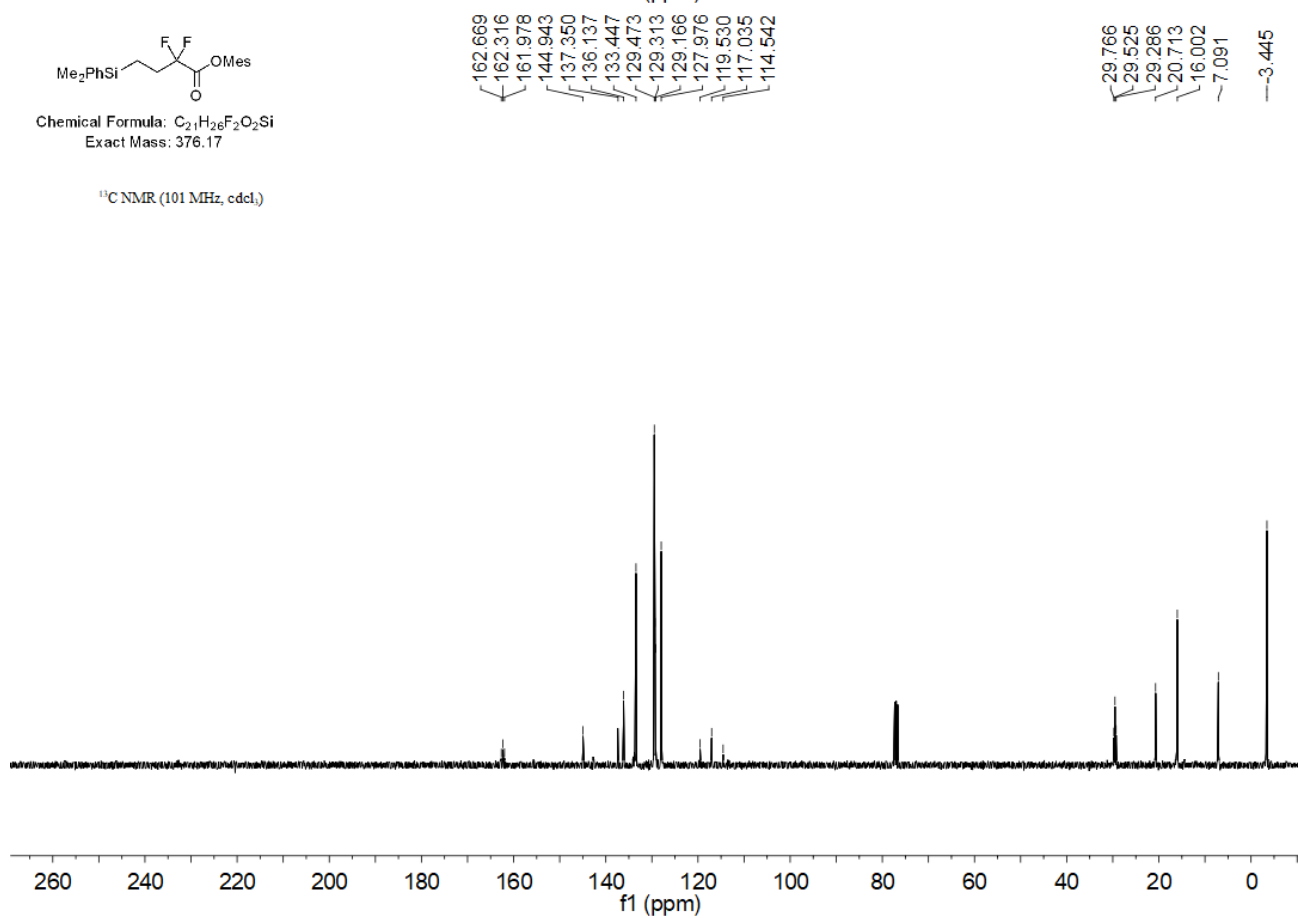

# 4-(Dimethyl(phenyl)silyl)-2,2-difluoro-1-morpholinobutan-1-one (3o)

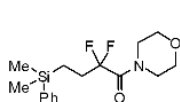

Chemical Formula:  $C_{16}H_{23}F_2NO_2Si$   
Exact Mass: 327.1466

$^1H$  NMR (400 MHz,  $cdCl_3$ )

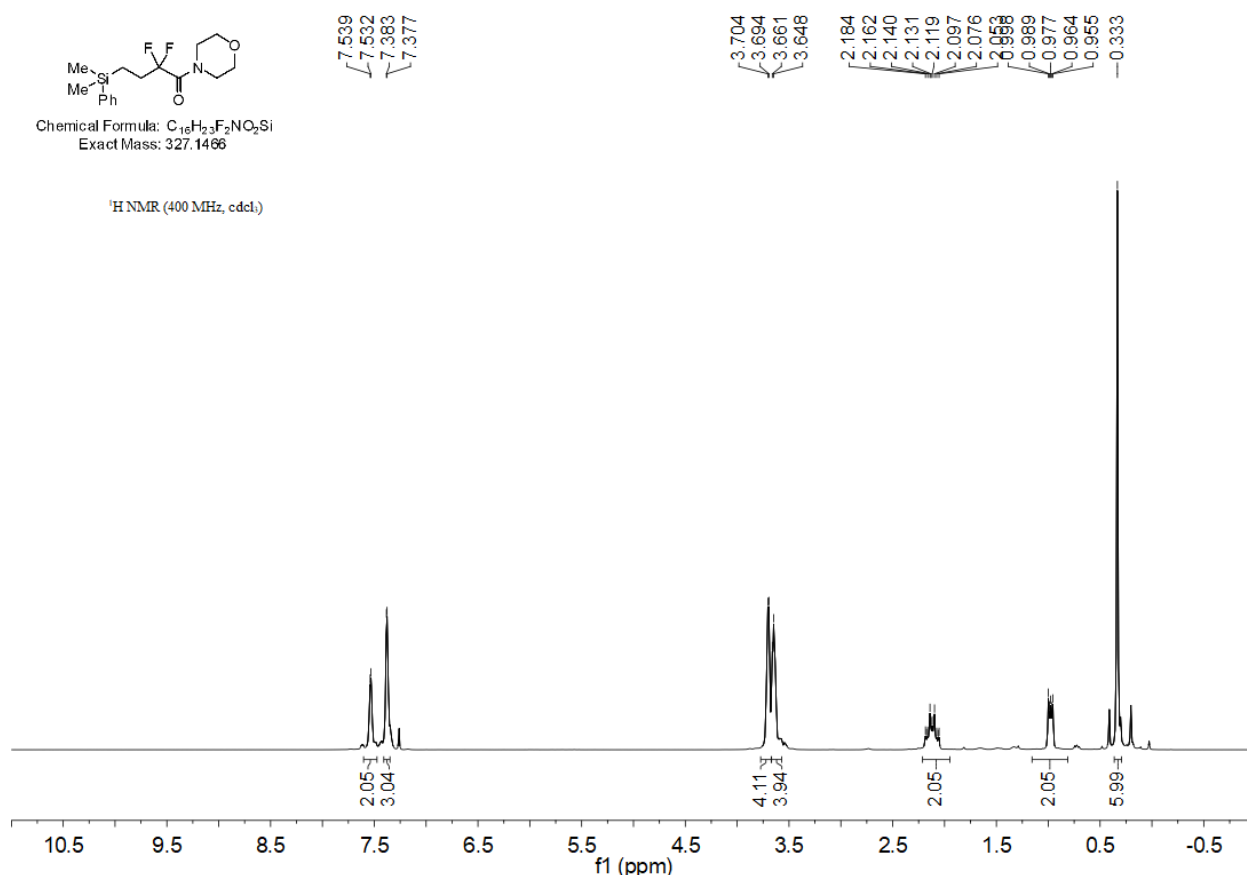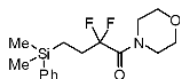

Chemical Formula:  $C_{16}H_{23}F_2NO_2Si$   
Exact Mass: 327.1466

$^{19}F$  NMR (376 MHz,  $cdCl_3$ )

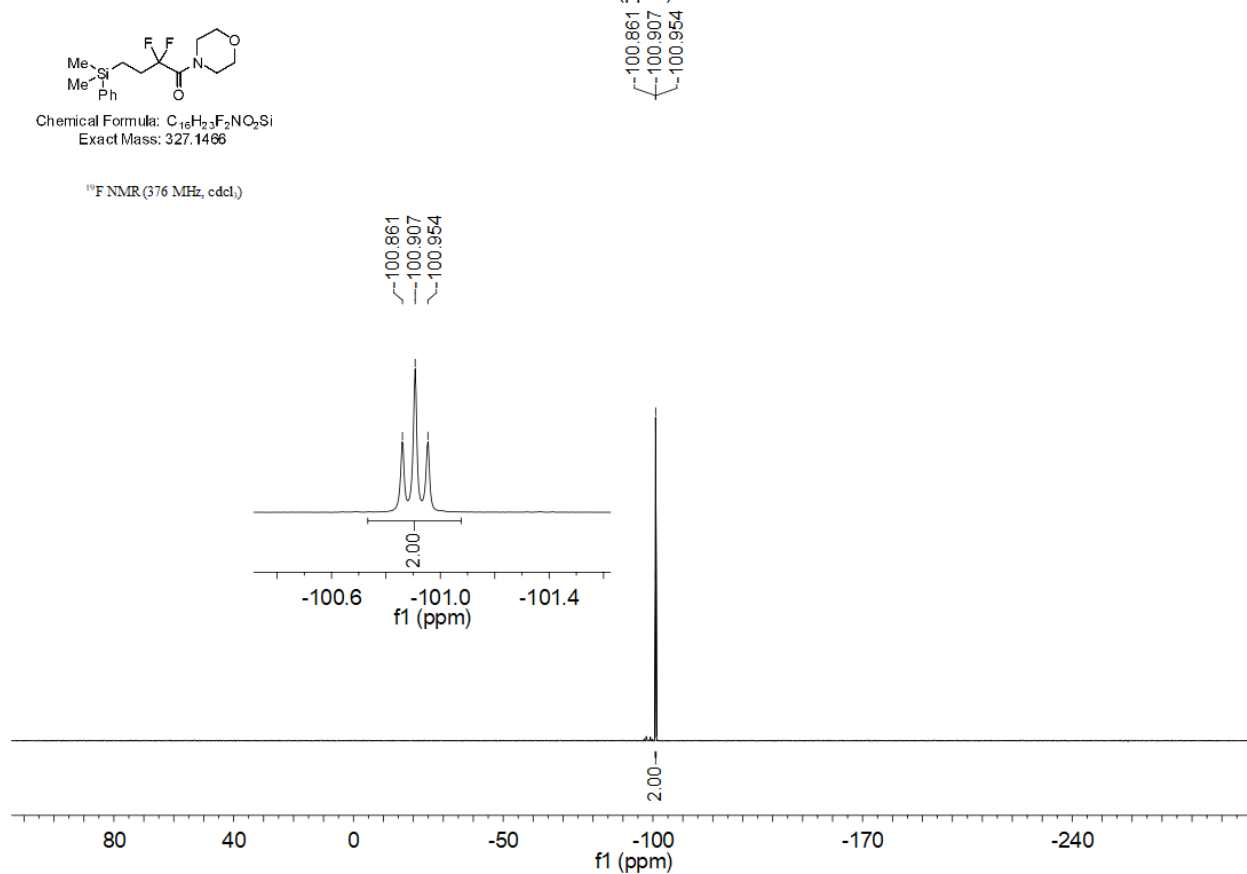

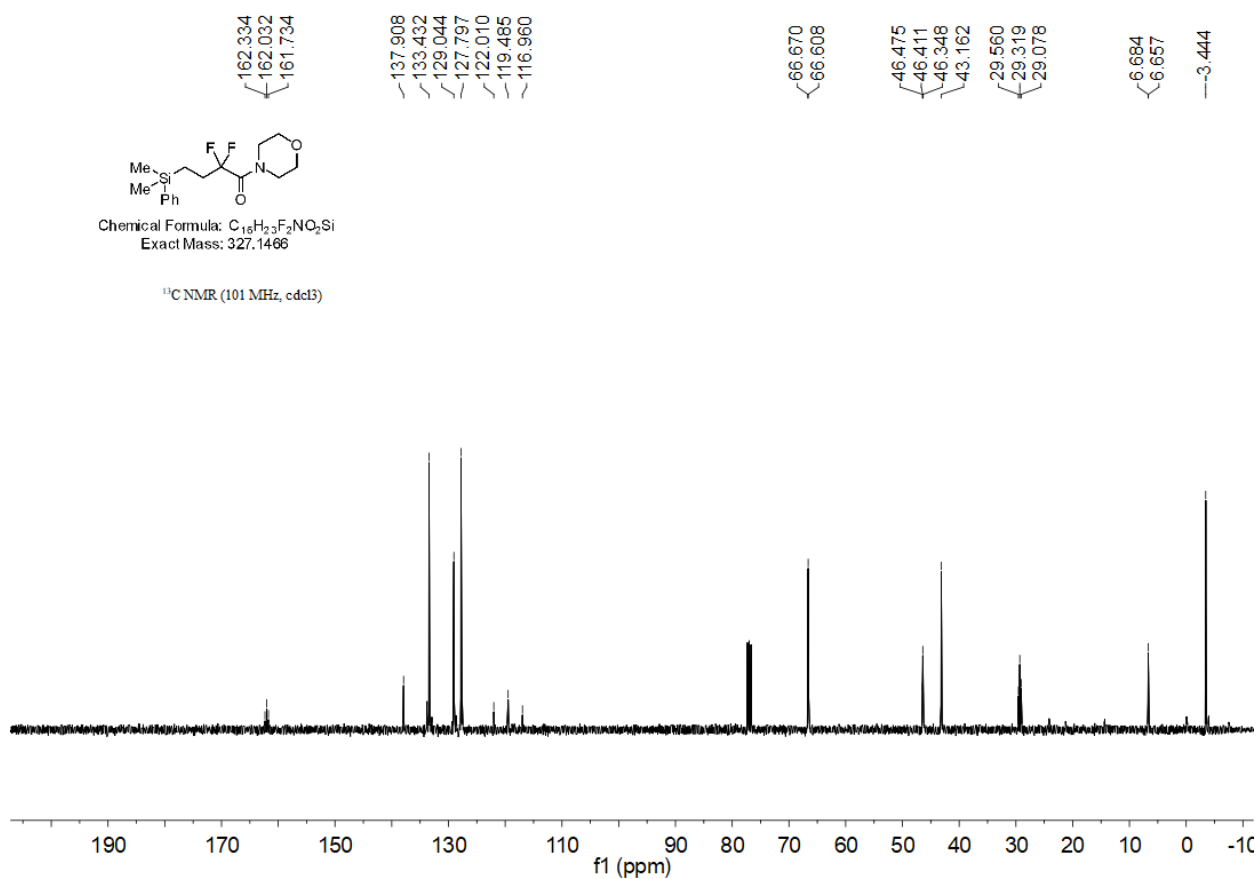

**(3,3-Difluoro-5-(triisopropylsilyl)pent-4-yn-1-yl)dimethyl(phenyl)silane (3p)**

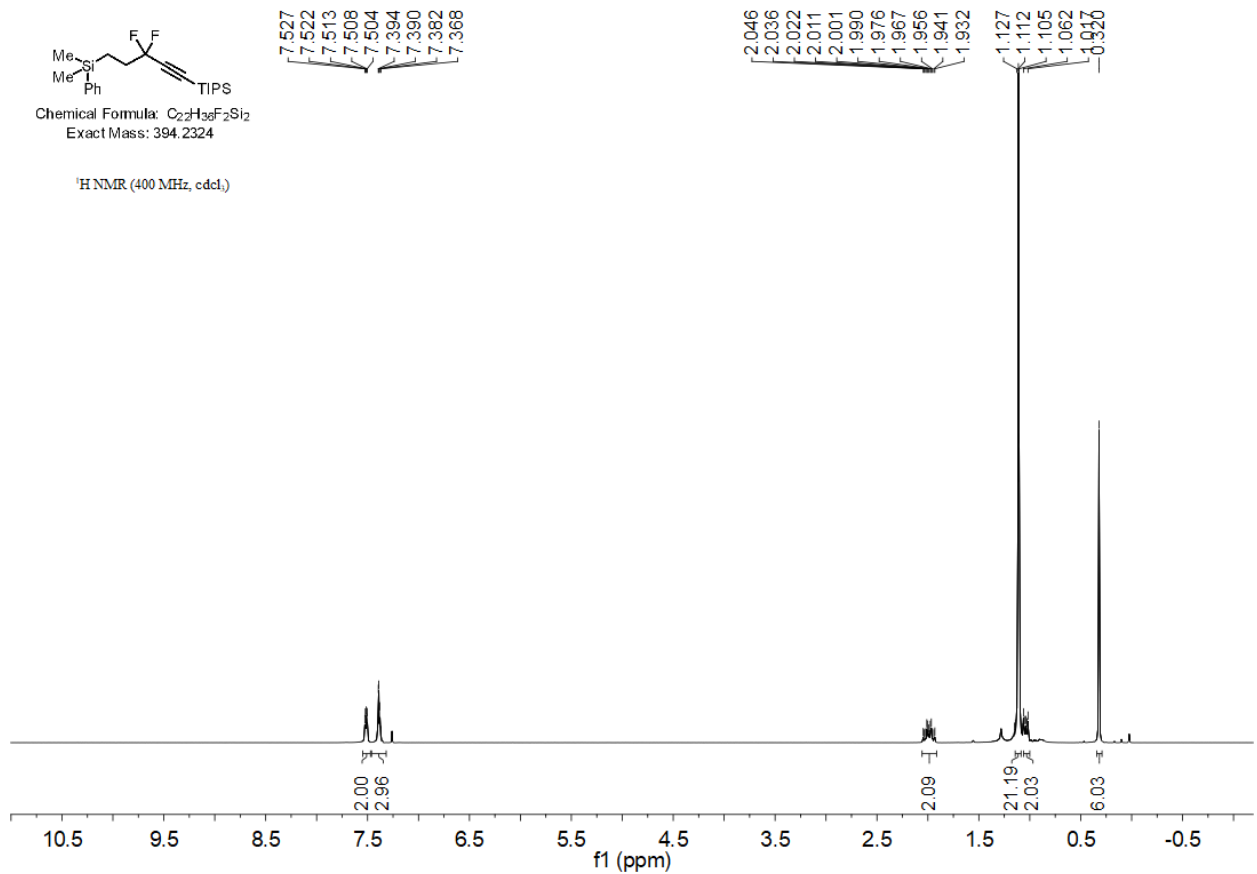

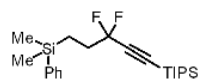

Chemical Formula:  $C_{22}H_{36}F_2Si_2$   
Exact Mass: 394.2324

$^{19}F$  NMR (376 MHz,  $cdcl_3$ )

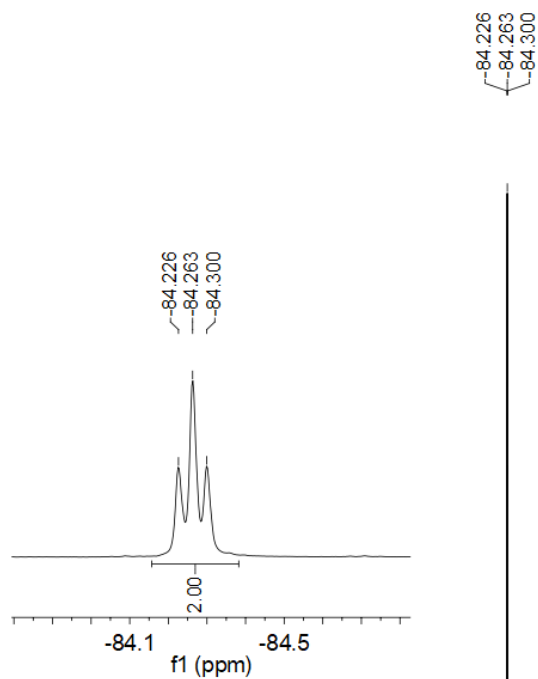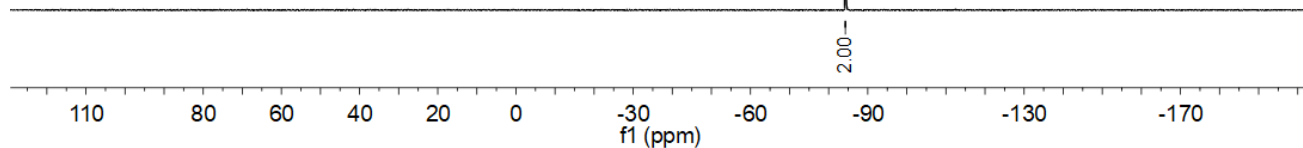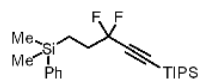

Chemical Formula:  $C_{22}H_{36}F_2Si_2$   
Exact Mass: 394.2324

$^{13}C$  NMR (126 MHz,  $CDCl_3$ )

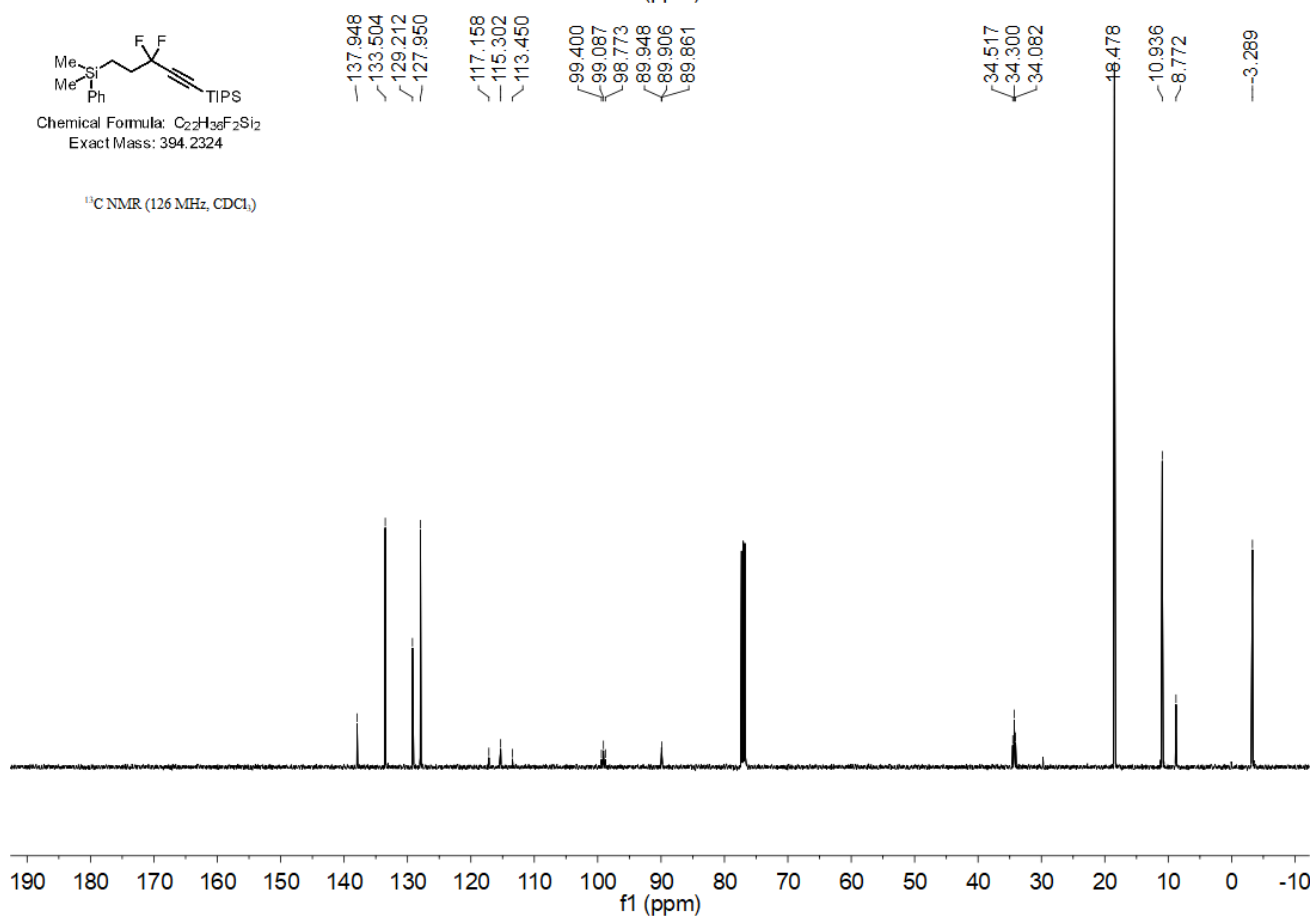

***t*-Butyl((6,6-difluoro-8-(trimethylsilyl)oct-4-yn-1-yl)oxy)dimethylsilane (3q)**

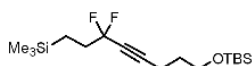

Chemical Formula:  $C_{17}H_{34}F_2OSi_2$   
Exact Mass: 348.2116

$^1H$  NMR (400 MHz,  $cdCl_3$ )

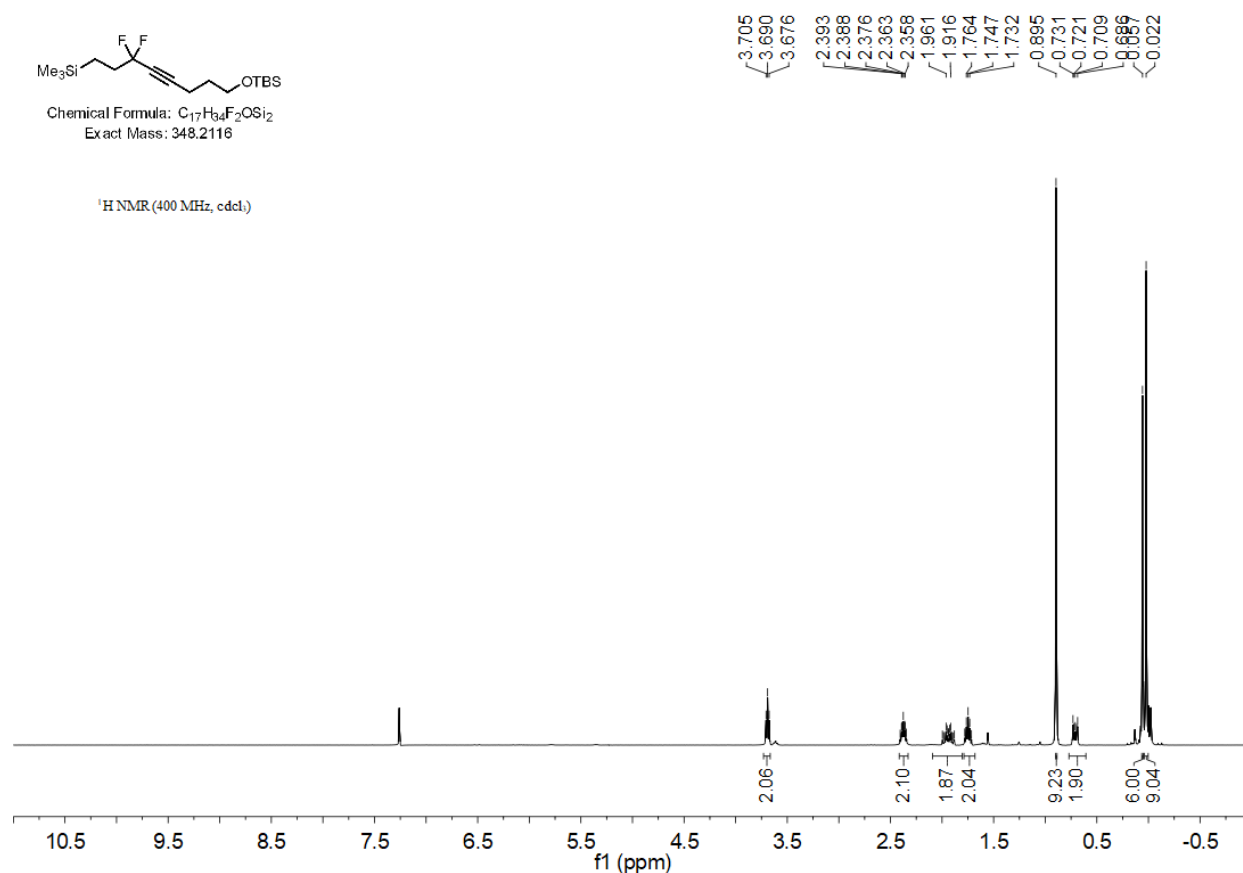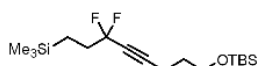

Chemical Formula:  $C_{17}H_{34}F_2OSi_2$   
Exact Mass: 348.2116

$^{19}F$  NMR (376 MHz,  $cdCl_3$ )

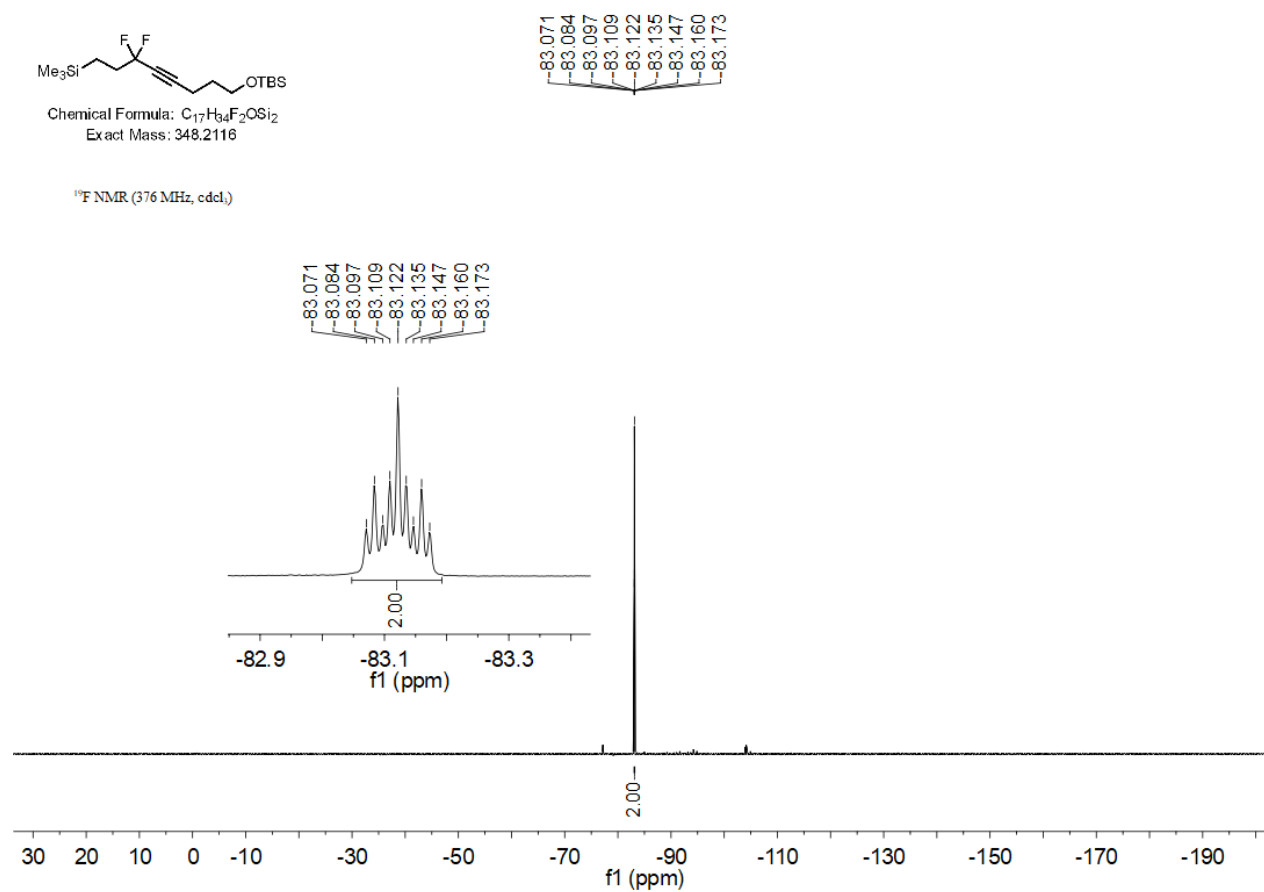

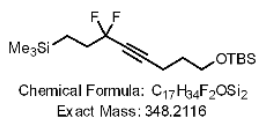

<sup>13</sup>C NMR (101 MHz, cdcl<sub>3</sub>)

~118.138  
~115.836  
~113.531

~88.180  
~88.115  
~88.050  
~74.529  
~74.127  
~73.725

~61.173

~34.649  
~34.374  
~34.094  
~30.884  
~25.908  
~18.305  
~14.819  
~9.230

~1.983  
~5.388

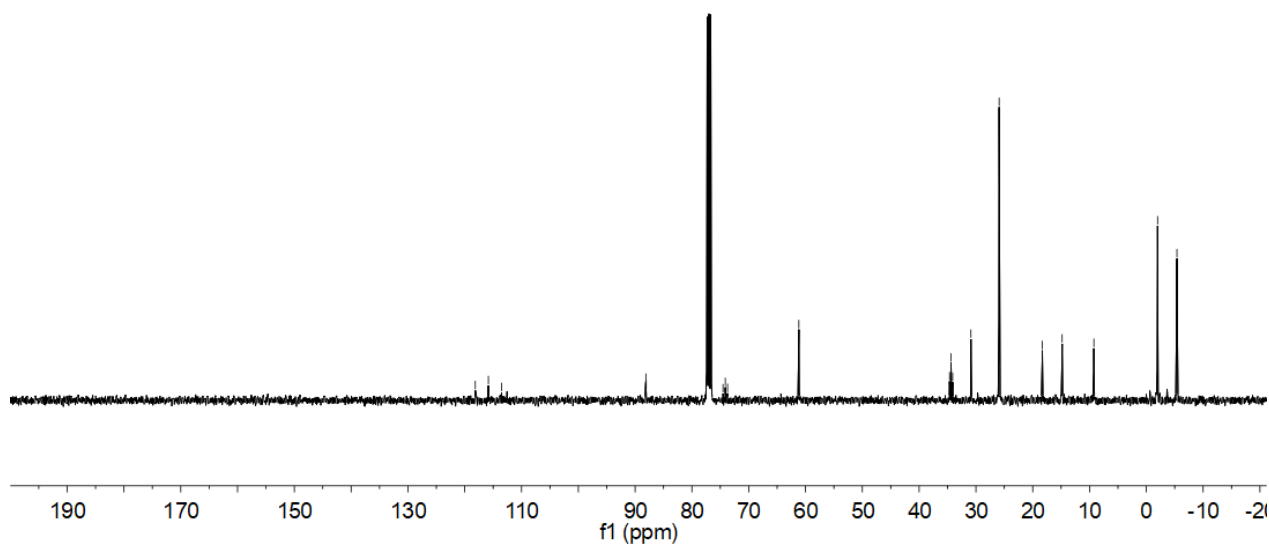

## 2-(3-(Dimethyl(phenyl)silyl)-1,1-difluoropropyl)-5-methylbenzo[d]oxazole (3r)

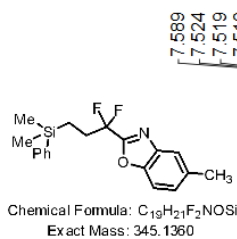

<sup>1</sup>H NMR (400 MHz, cdcl<sub>3</sub>)

7.589  
7.524  
7.519  
7.510  
7.501  
7.484  
7.463  
7.382  
7.378  
7.369  
7.265  
7.246

2.494  
2.437  
2.427  
2.414  
2.396  
2.387  
2.374  
2.361  
2.352  
2.333  
2.321  
2.312  
1.026  
1.016  
1.003  
0.991  
0.981  
0.333

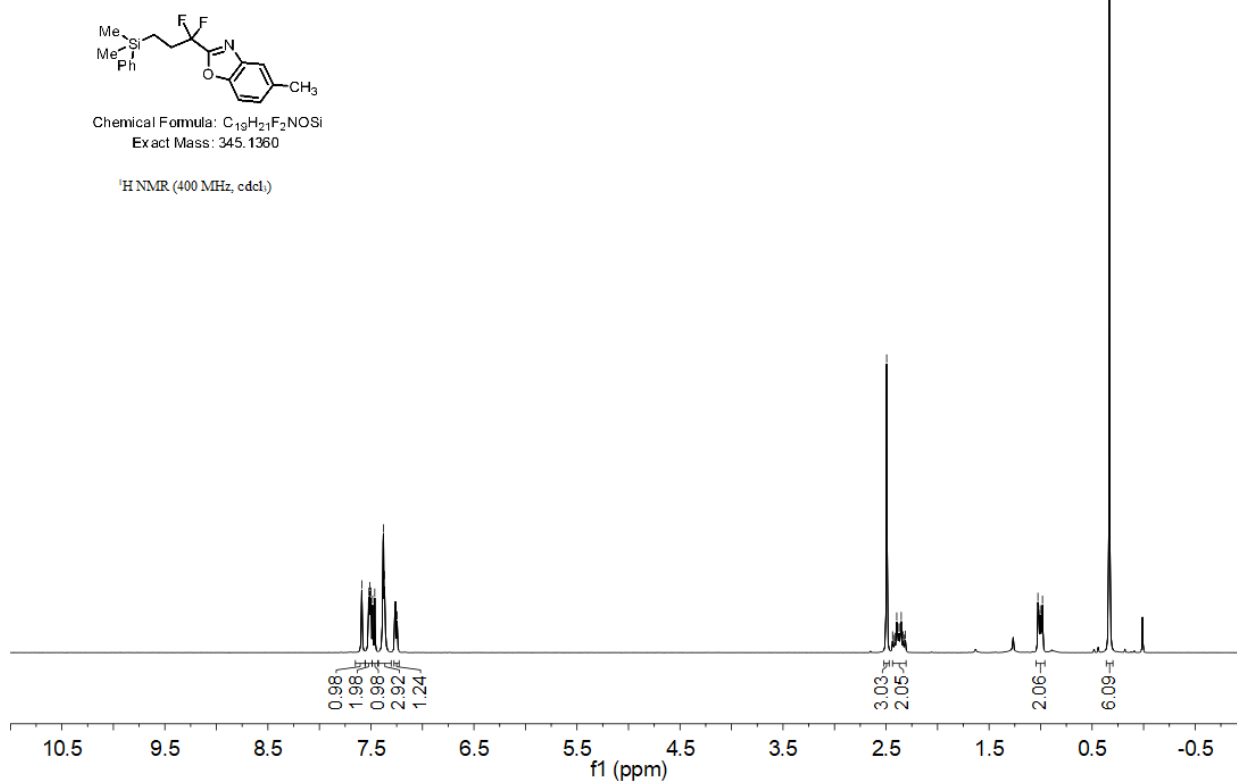



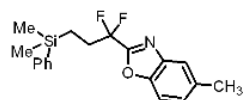

Chemical Formula:  $C_{19}H_{21}F_2NOSi$   
Exact Mass: 345.1360

$^{19}F$  NMR (376 MHz,  $cdCl_3$ )

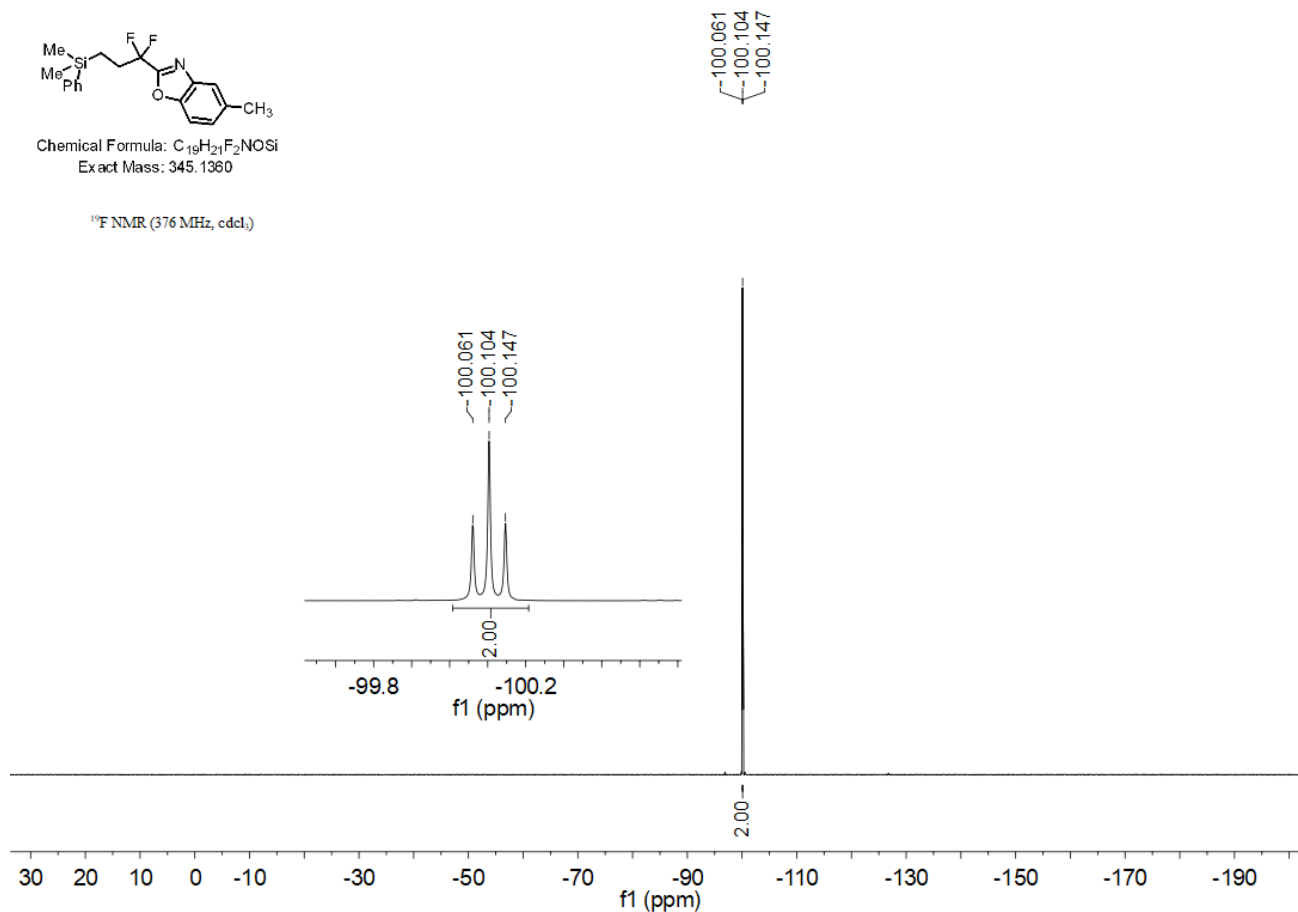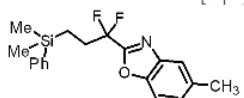

Chemical Formula:  $C_{19}H_{21}F_2NOSi$   
Exact Mass: 345.1360

$^{13}C$  NMR (126 MHz,  $CDCl_3$ )

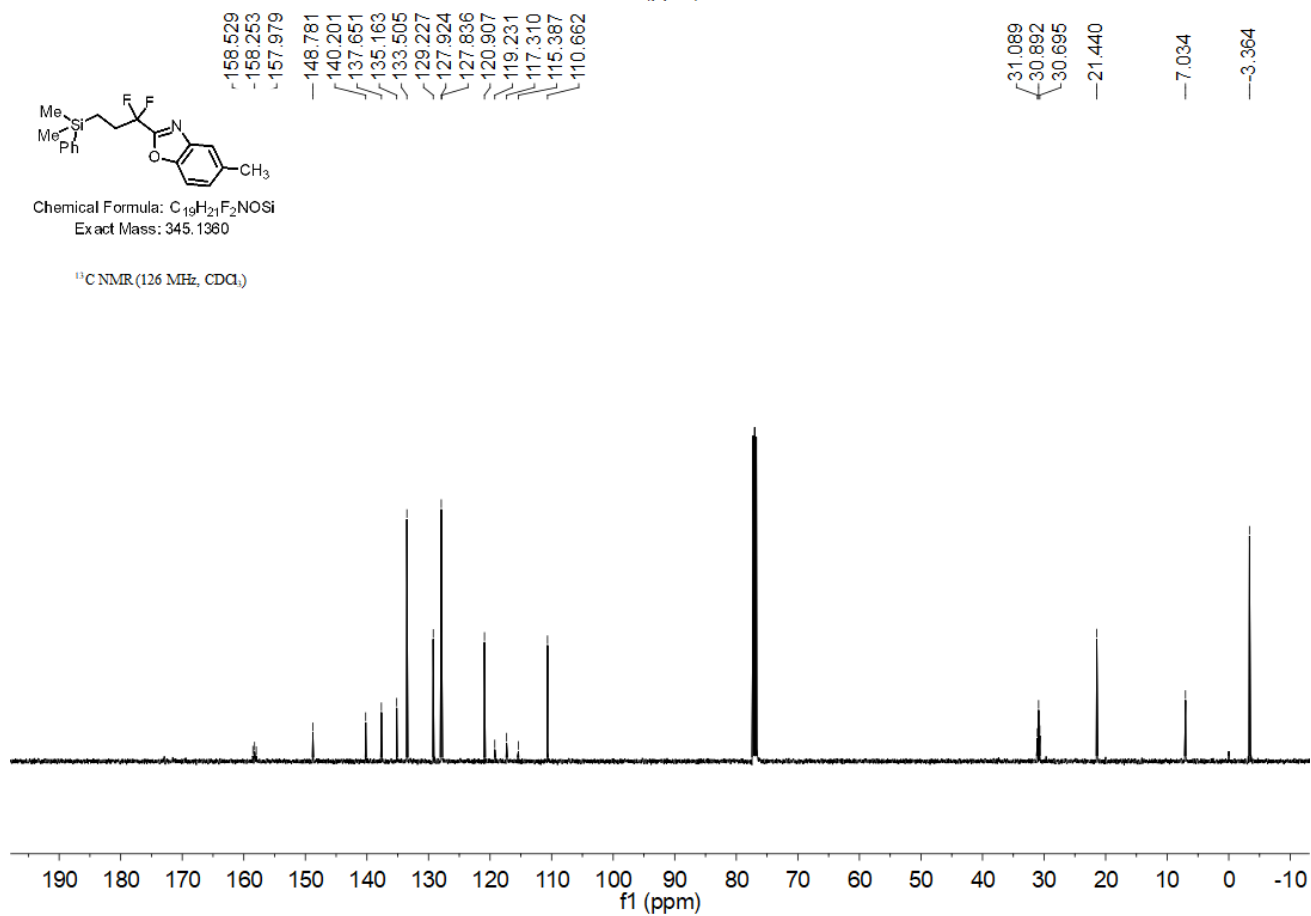

## 2,2-Difluoro-5-phenylpentyl benzoate (8a)

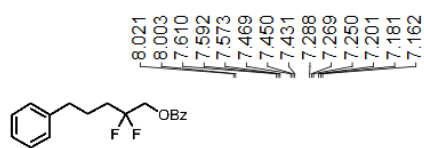

Chemical Formula:  $C_{18}H_{17}F_2O_2$   
Exact Mass: 304.1275

$^1H$  NMR (400 MHz,  $cdCl_3$ )

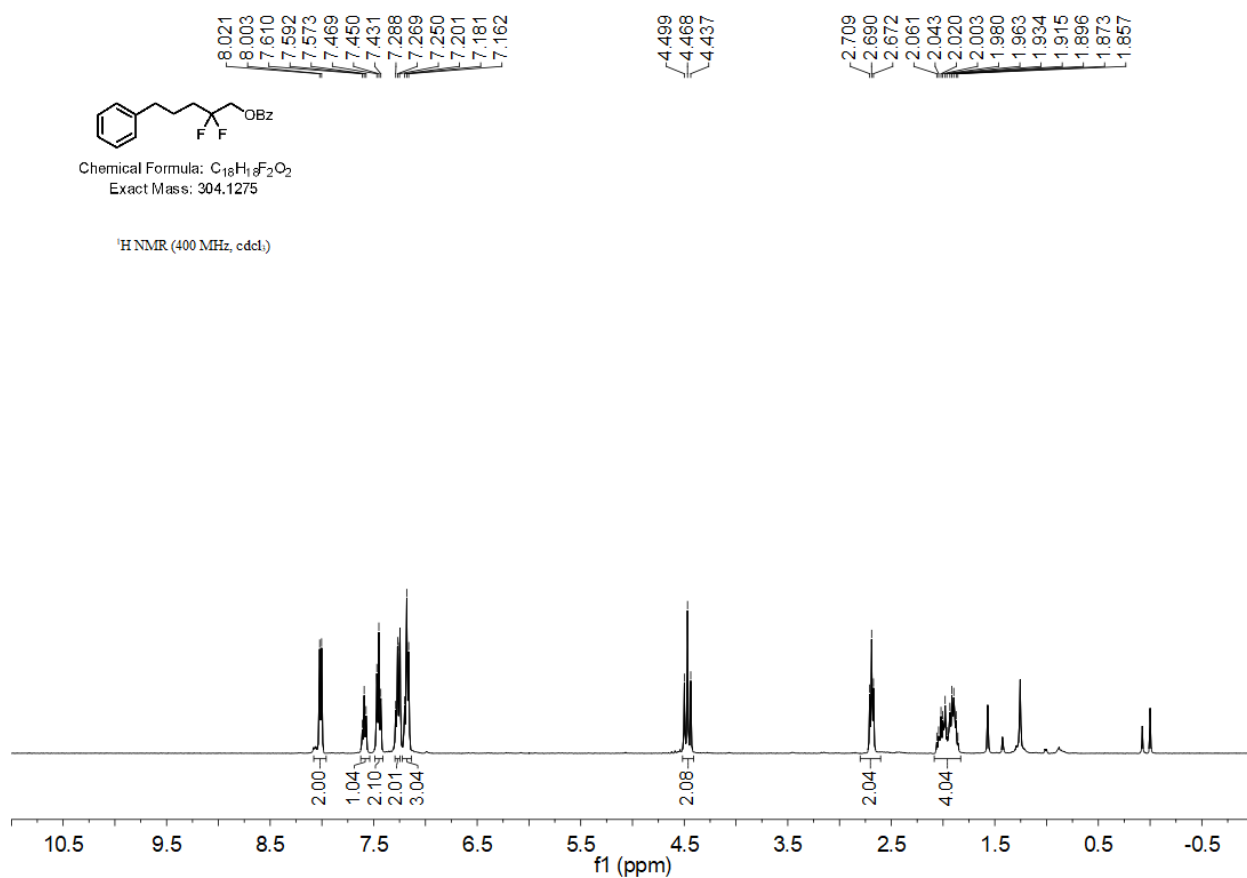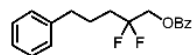

Chemical Formula:  $C_{18}H_{17}F_2O_2$   
Exact Mass: 304.1275

$^{19}F$  NMR (376 MHz,  $cdCl_3$ )

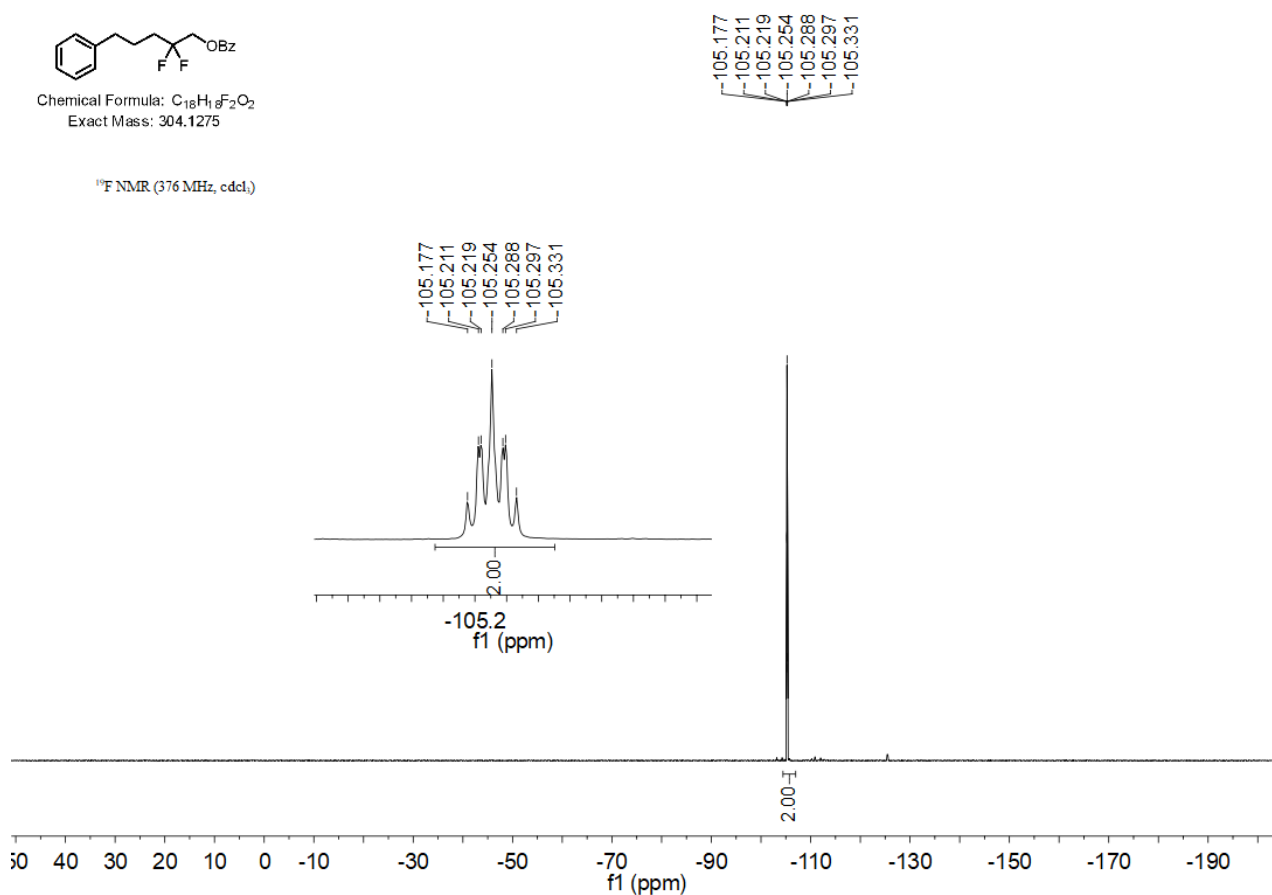

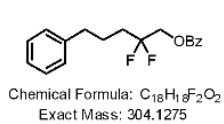

$^{13}C$  NMR (101 MHz,  $cdCl_3$ )

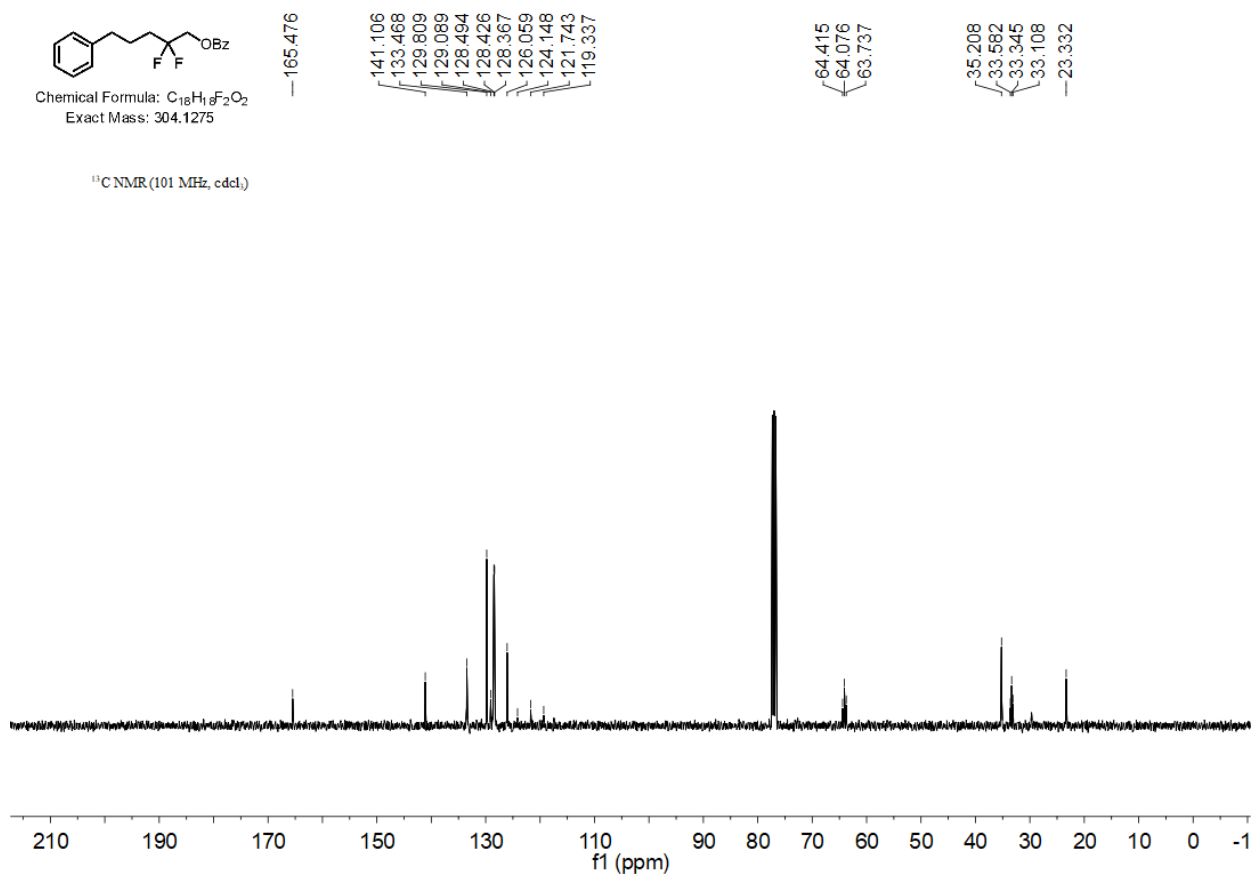

## 2,2-Difluoro-5-phenylpentyl ethanesulfonate (8b)

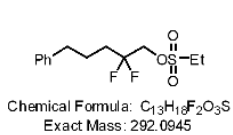

$^1H$  NMR (400 MHz,  $cdCl_3$ )

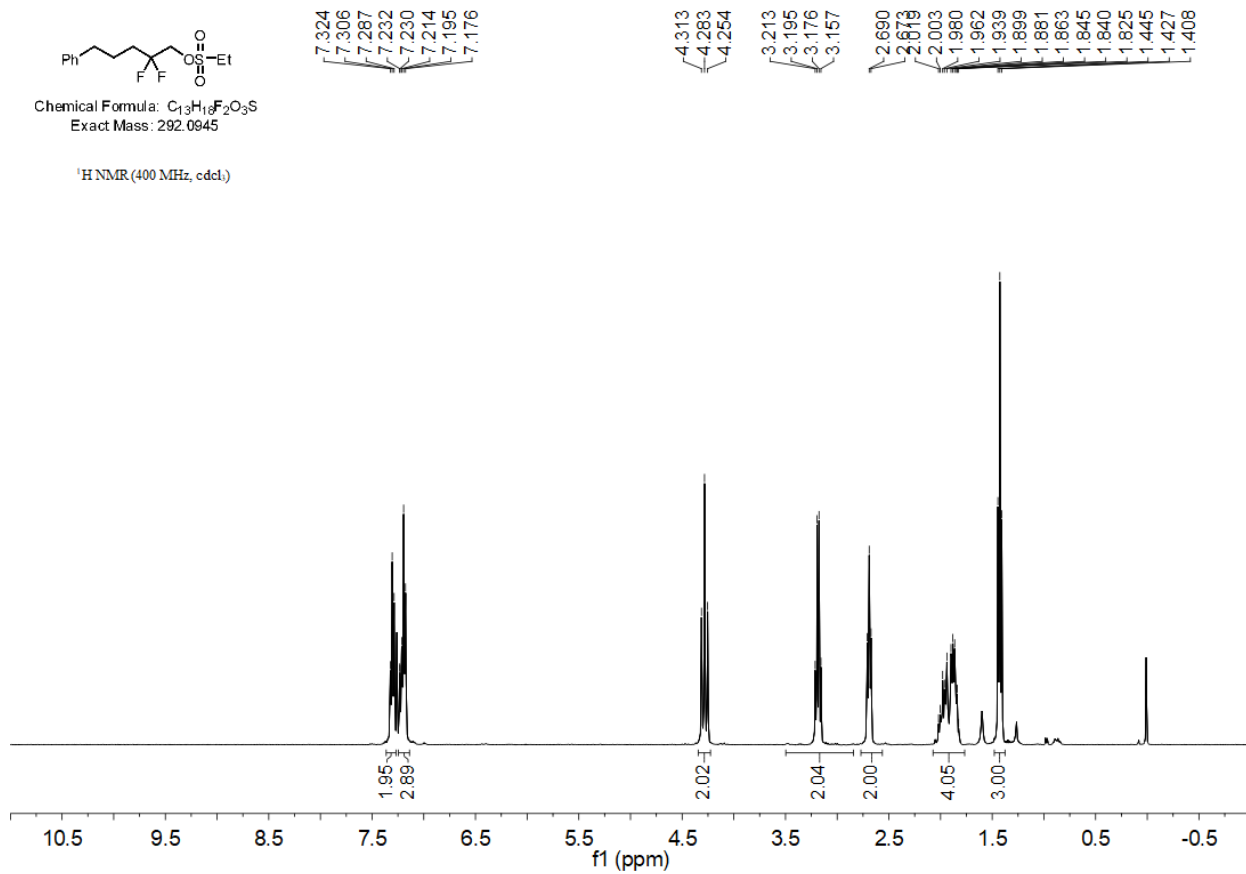

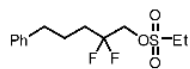

Chemical Formula:  $C_{13}H_{13}F_2O_3S$   
Exact Mass: 292.0945

$^{19}F$  NMR (376 MHz,  $cdCl_3$ )

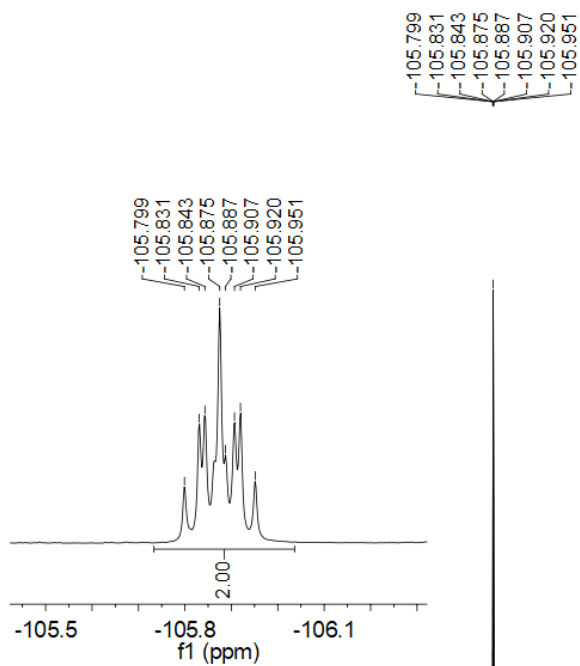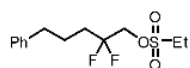

Chemical Formula:  $C_{13}H_{13}F_2O_3S$   
Exact Mass: 292.0945

$^{13}C$  NMR (101 MHz,  $cdCl_3$ )

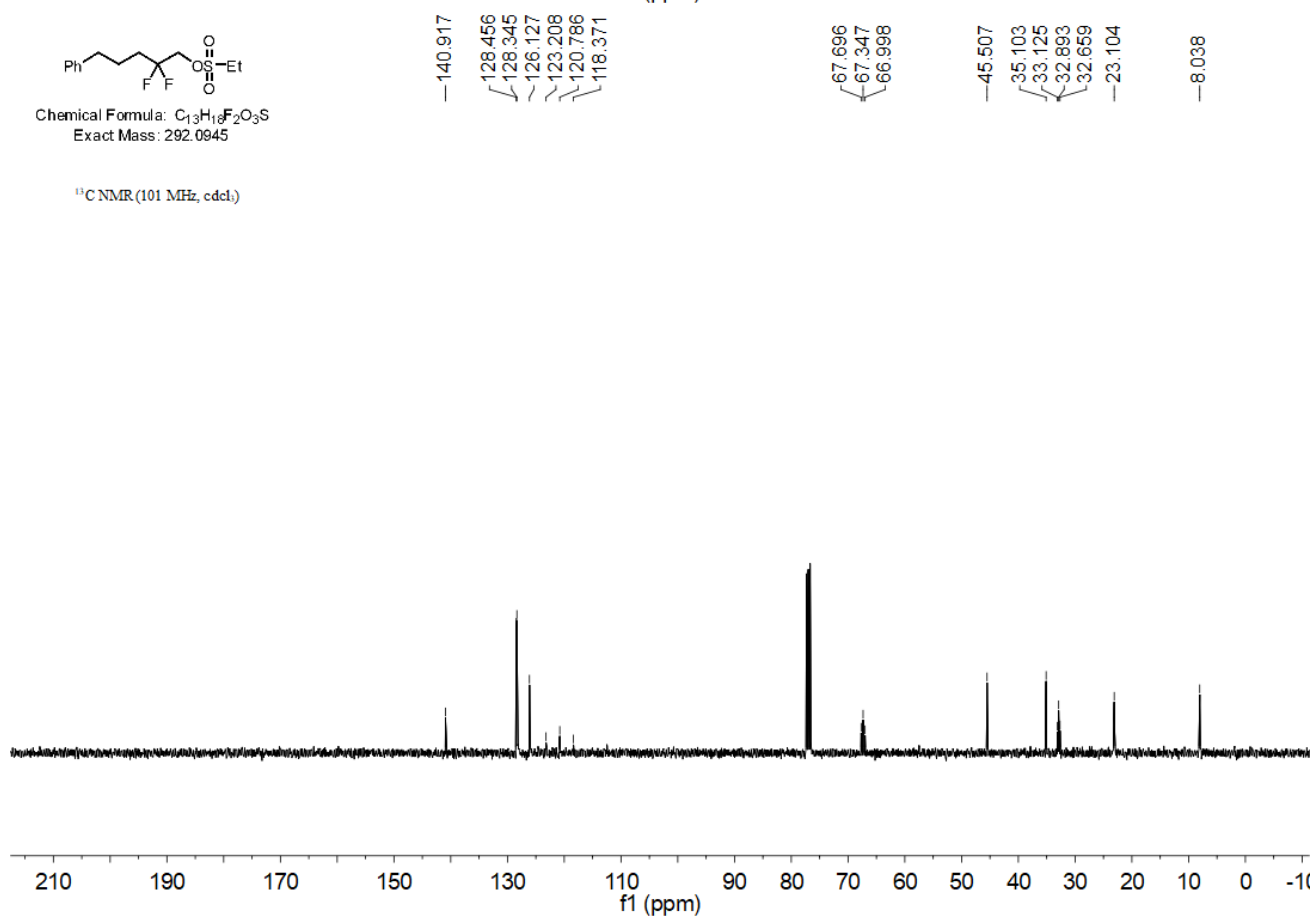

# 6,6-Difluoro-9-phenylnonanenitrile (8c)

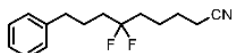

Chemical Formula:  $C_{15}H_{19}F_2N$   
Exact Mass: 251.1486

$^1H$  NMR (400 MHz,  $cdcl_3$ )

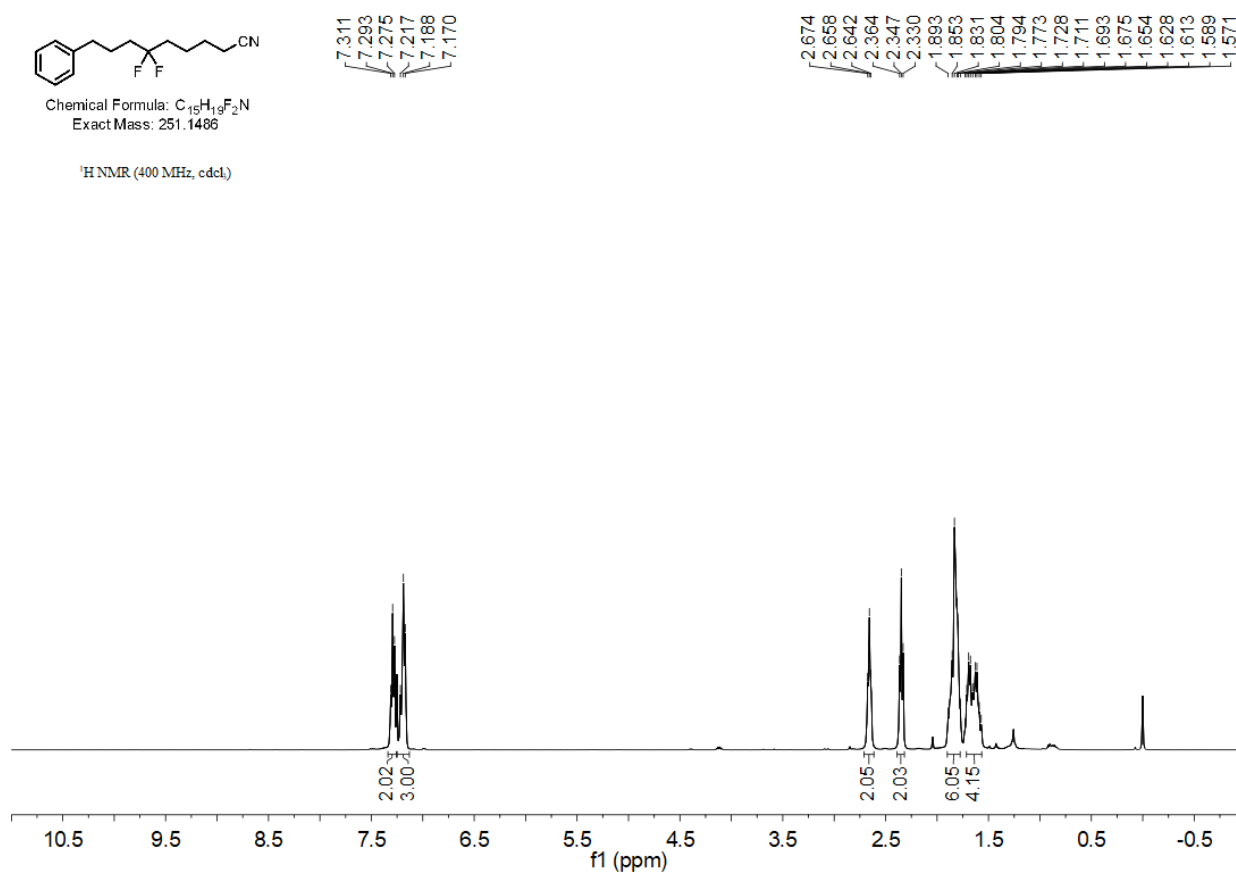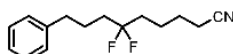

Chemical Formula:  $C_{15}H_{19}F_2N$   
Exact Mass: 251.1486

$^{19}F$  NMR (376 MHz,  $cdcl_3$ )

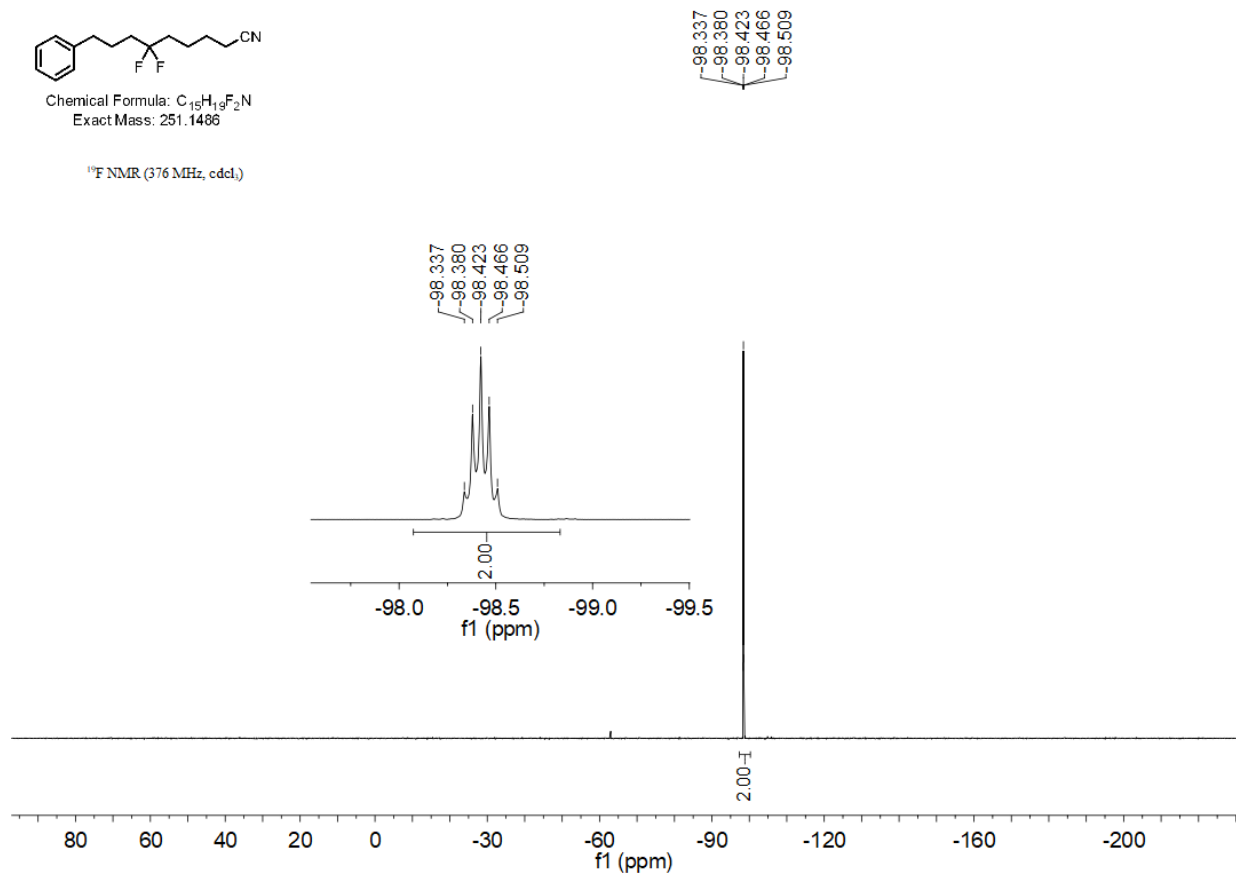

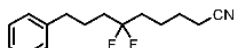

Chemical Formula:  $C_{15}H_{19}F_2N$   
Exact Mass: 251.1486

$^{13}C$  NMR (101 MHz,  $cdCl_3$ )

141.357  
128.404  
128.345  
127.019  
126.009  
124.825  
122.229  
119.226

36.136  
35.883  
35.753  
35.630  
35.495  
35.307  
35.238  
25.088  
23.903  
21.538  
21.491  
21.444  
17.041

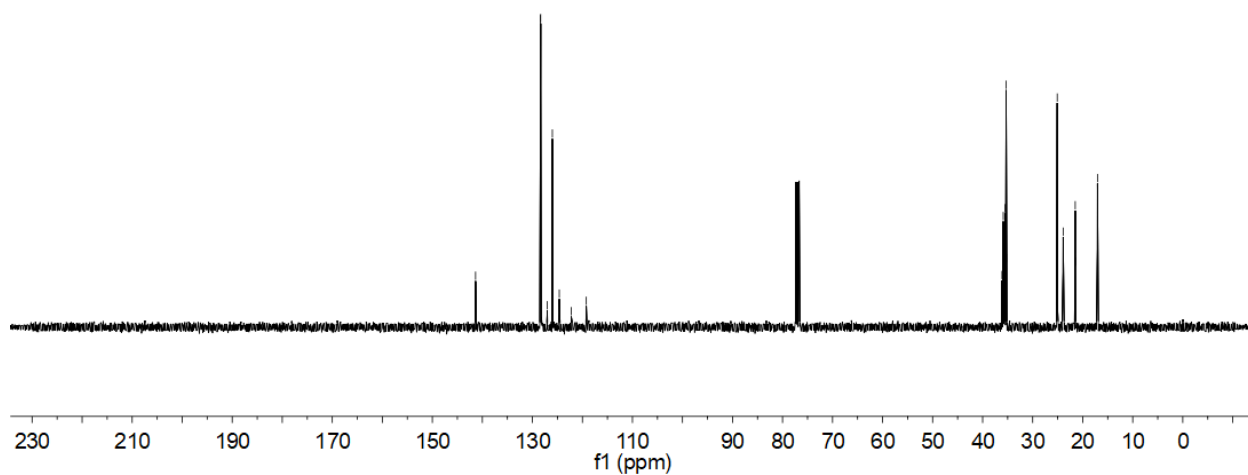

## 5,5-Difluoro-8-phenyloctyl acetate (8d)

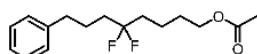

Chemical Formula:  $C_{16}H_{22}F_2O_2$   
Exact Mass: 284.1588

$^1H$  NMR (400 MHz,  $cdCl_3$ )

7.297  
7.280  
7.261  
7.204  
7.186  
7.179  
7.175  
7.158

4.062  
4.046  
4.029

2.664  
2.646  
2.629

2.032  
1.852  
1.847  
1.831  
1.818  
1.810  
1.790  
1.780  
1.770  
1.658  
1.641  
1.622  
1.531  
1.523  
1.516  
1.506

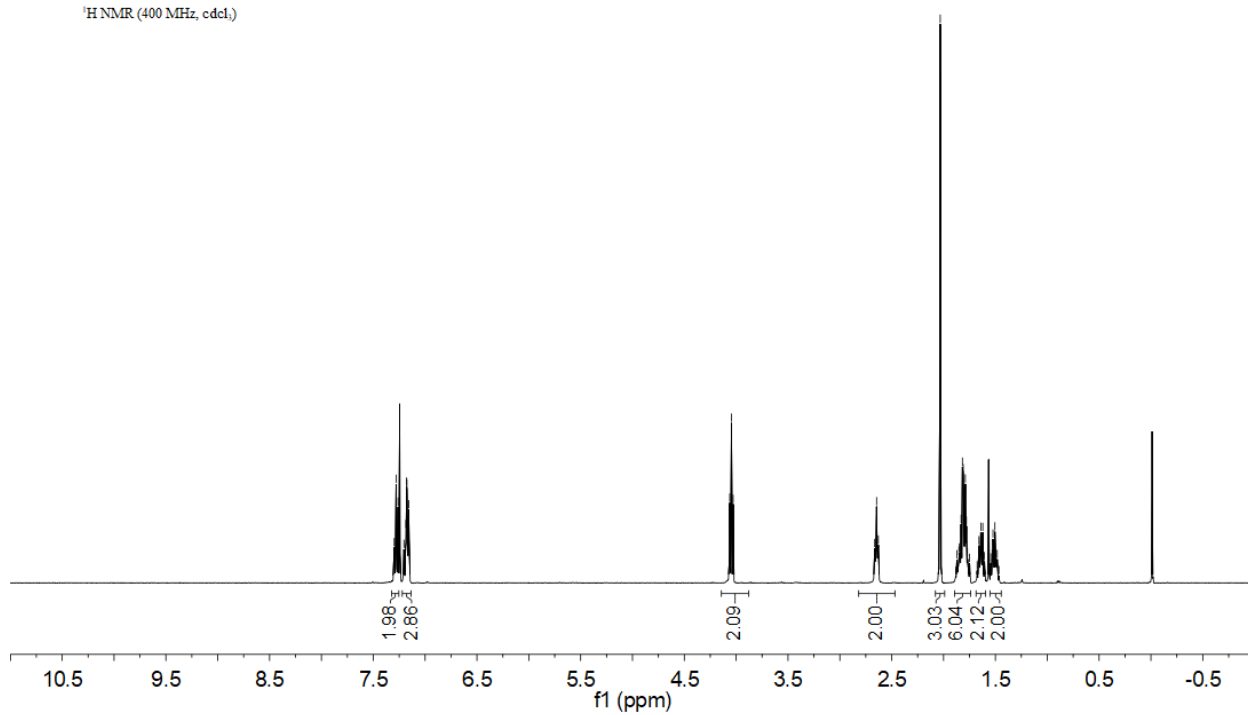

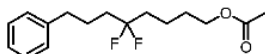

Chemical Formula:  $C_{16}H_{22}F_2O_2$   
Exact Mass: 284.1588

$^{19}F$  NMR (376 MHz,  $cdCl_3$ )

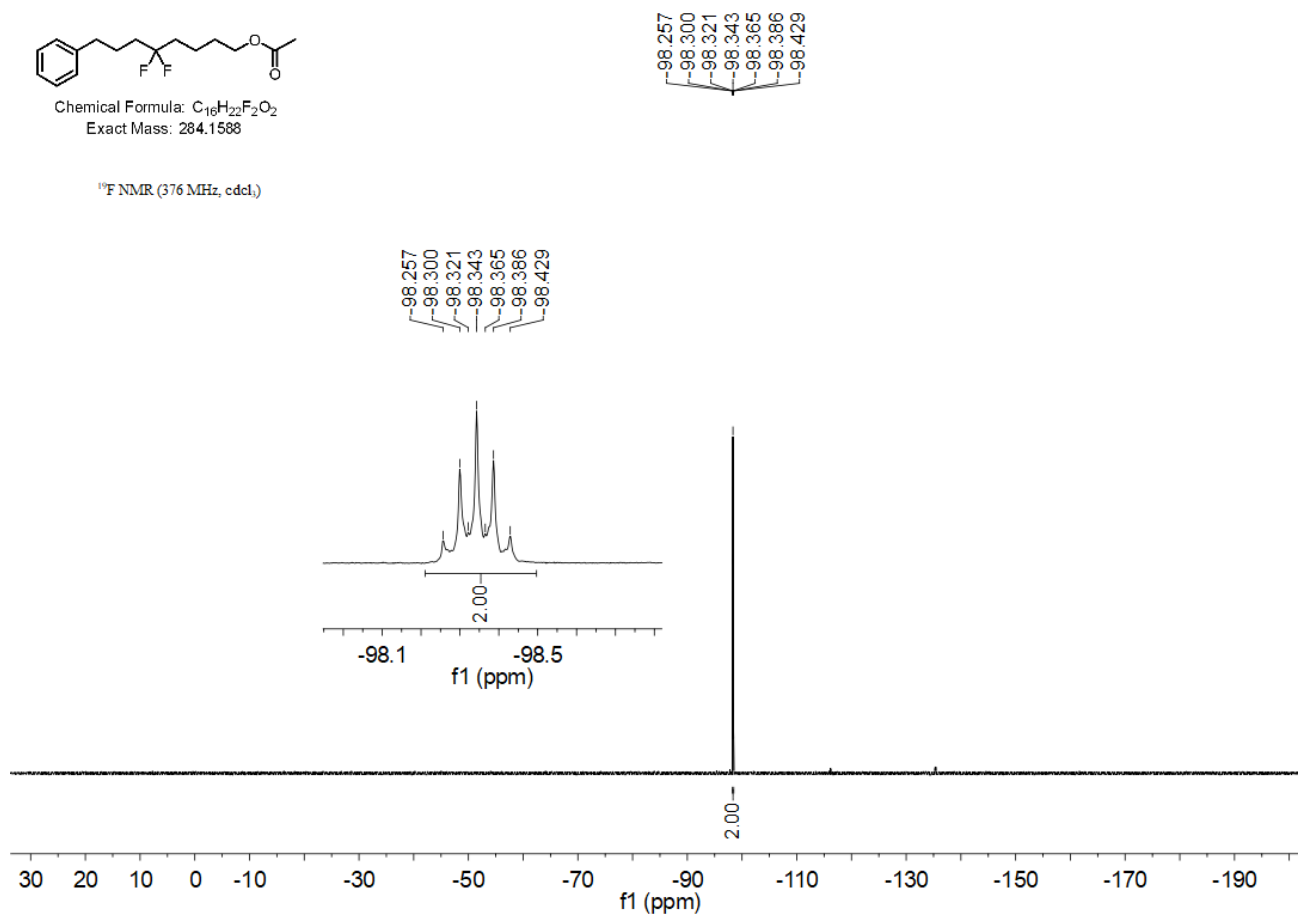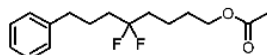

Chemical Formula:  $C_{16}H_{22}F_2O_2$   
Exact Mass: 284.1588

$^{13}C$  NMR (126 MHz,  $CDCl_3$ )

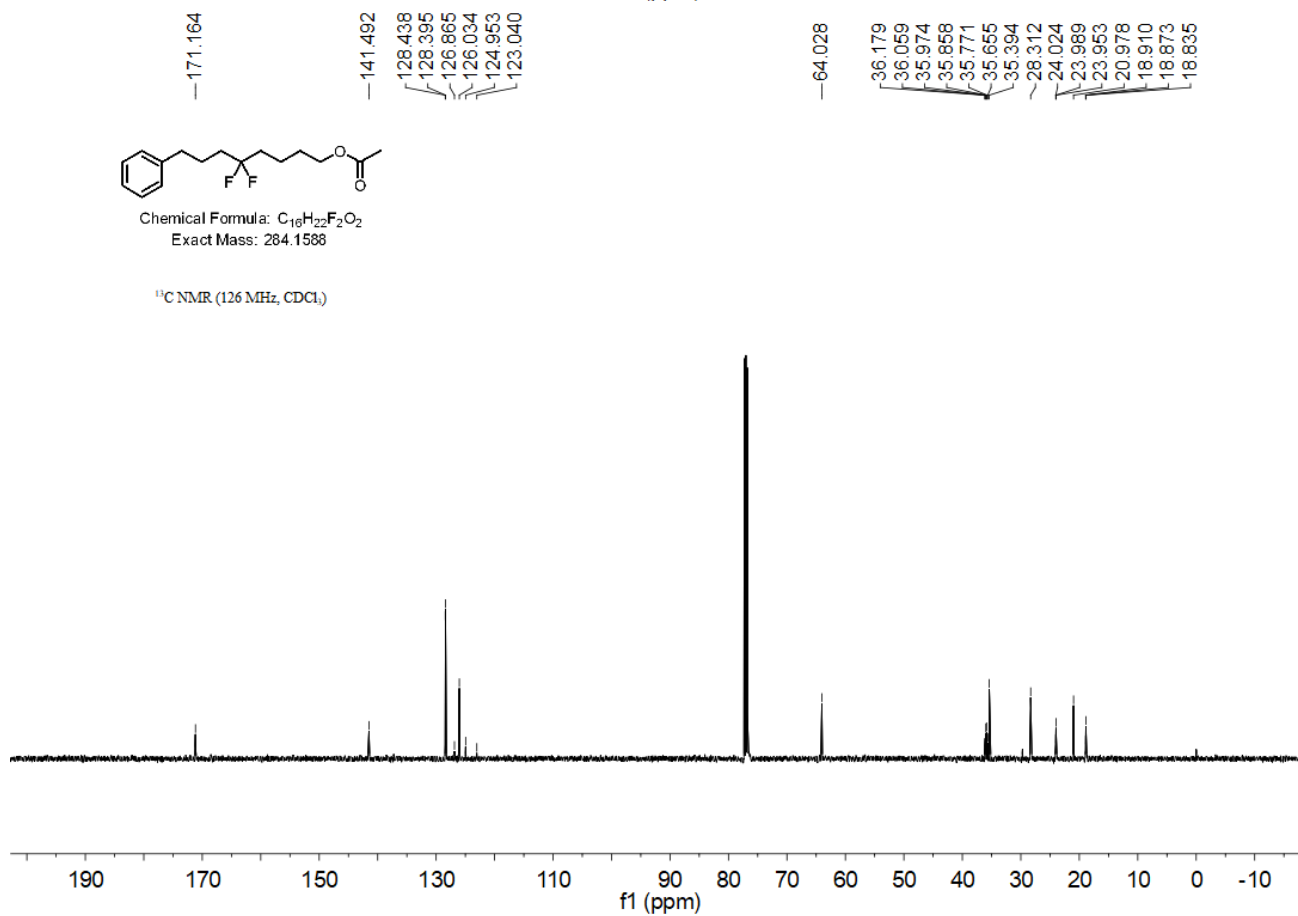

# 11-((*tert*-Dutyldimethylsilyl)oxy)-5,5-difluoroundecyl acetate (8e)

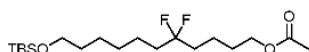

Chemical Formula: C<sub>19</sub>H<sub>38</sub>F<sub>2</sub>O<sub>3</sub>Si  
Exact Mass: 380.26

<sup>1</sup>H NMR (400 MHz, cdcl<sub>3</sub>)

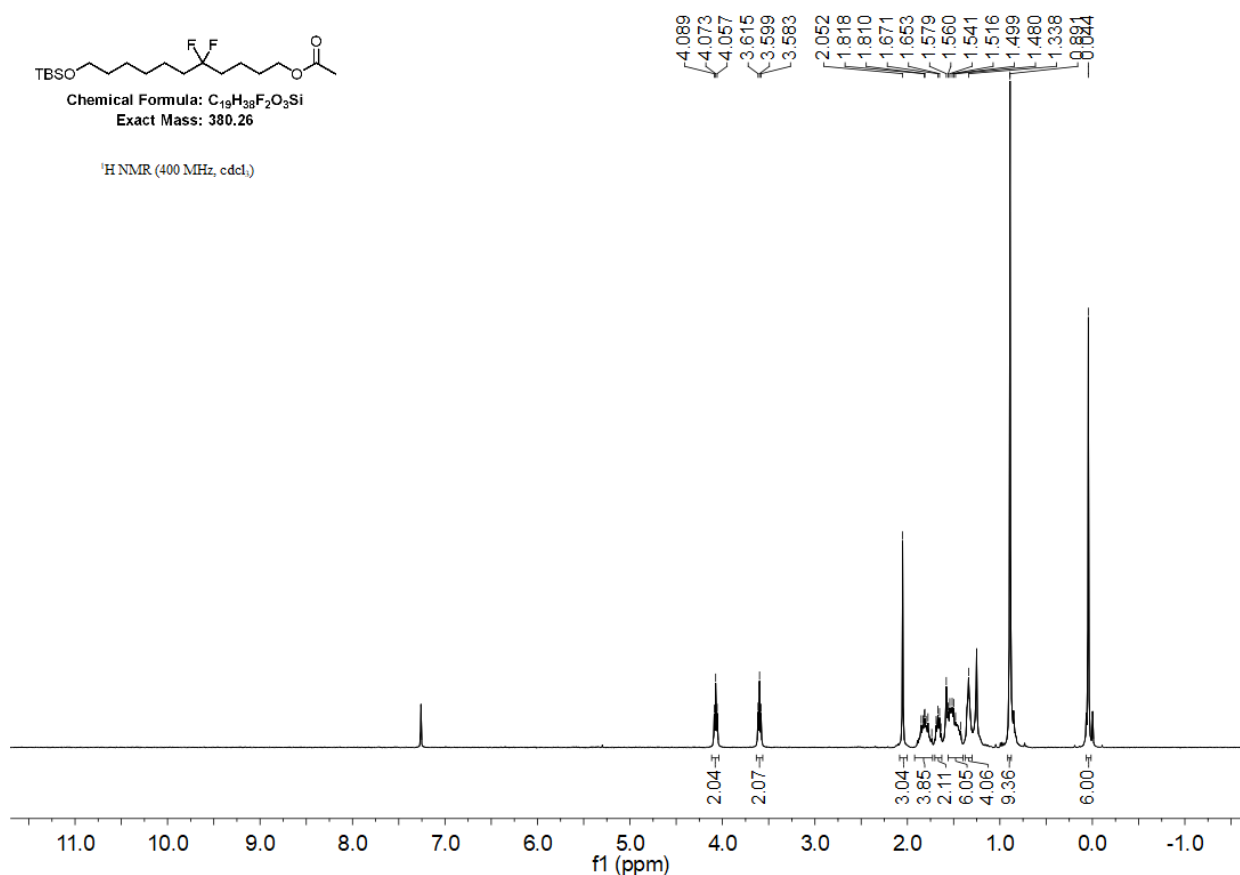

Chemical Formula: C<sub>19</sub>H<sub>38</sub>F<sub>2</sub>O<sub>3</sub>Si  
Exact Mass: 380.26

<sup>19</sup>F NMR (376 MHz, cdcl<sub>3</sub>)

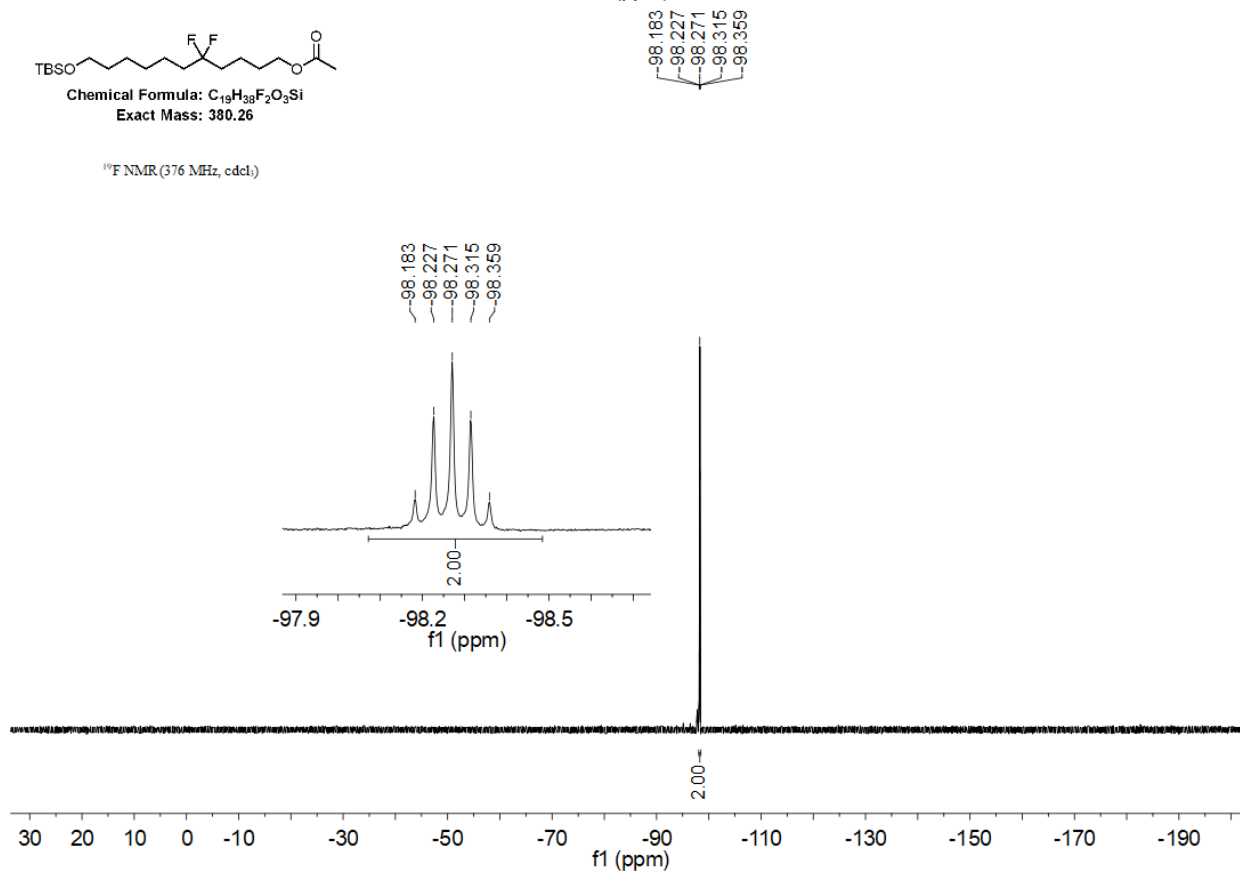



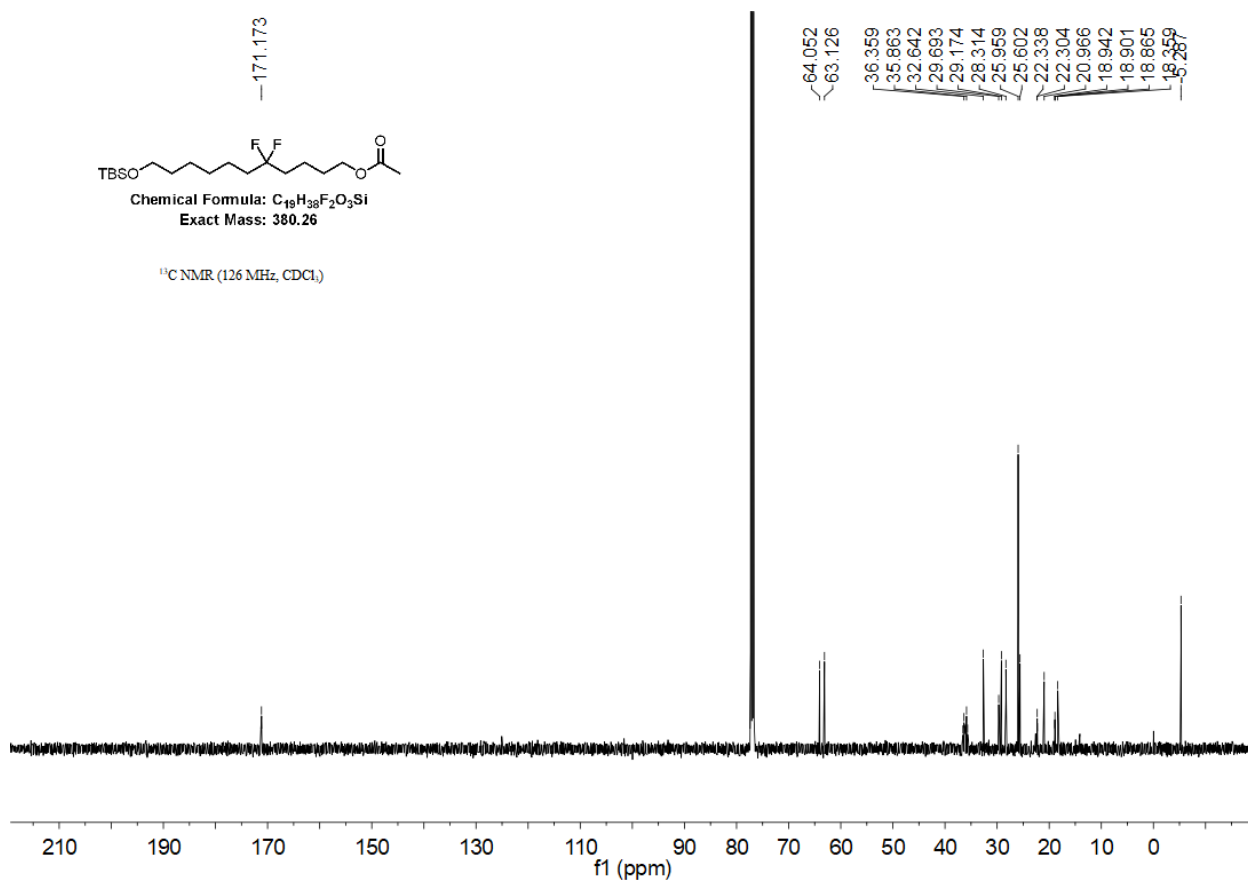

### 12-((*tert*-Butyldimethylsilyl)oxy)-6,6-difluorododecanenitrile (8f)

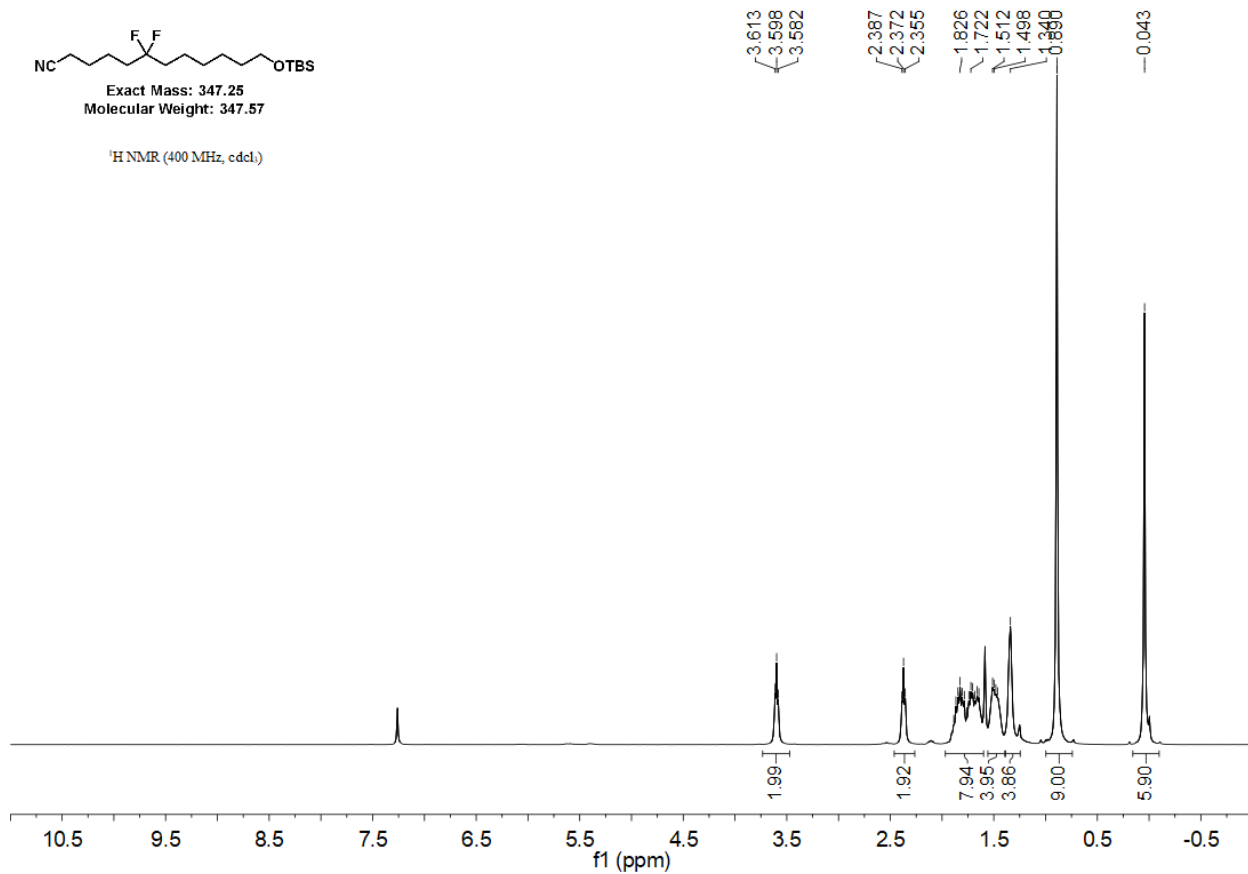

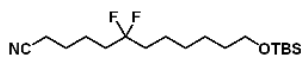

Exact Mass: 347.25  
Molecular Weight: 347.57

$^{19}\text{F}$  NMR (376 MHz,  $\text{cdcl}_3$ )

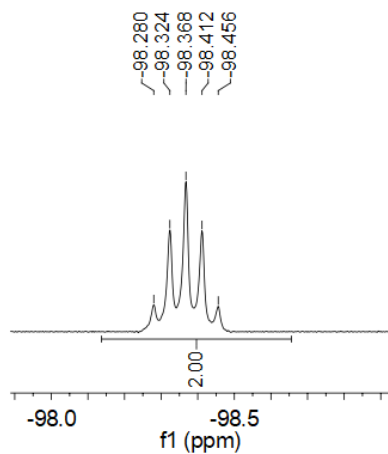

98.280  
98.324  
98.368  
98.412  
98.456

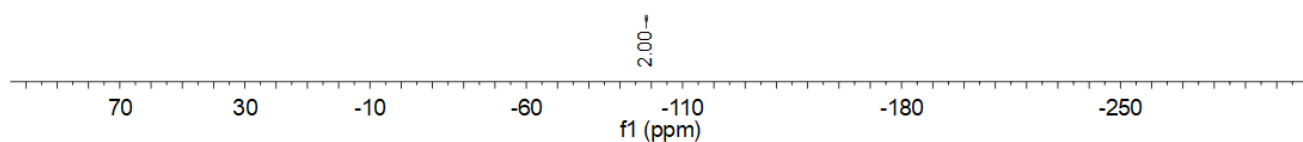

Exact Mass: 347.25  
Molecular Weight: 347.57

$^{13}\text{C}$  NMR (126 MHz,  $\text{CDCl}_3$ )

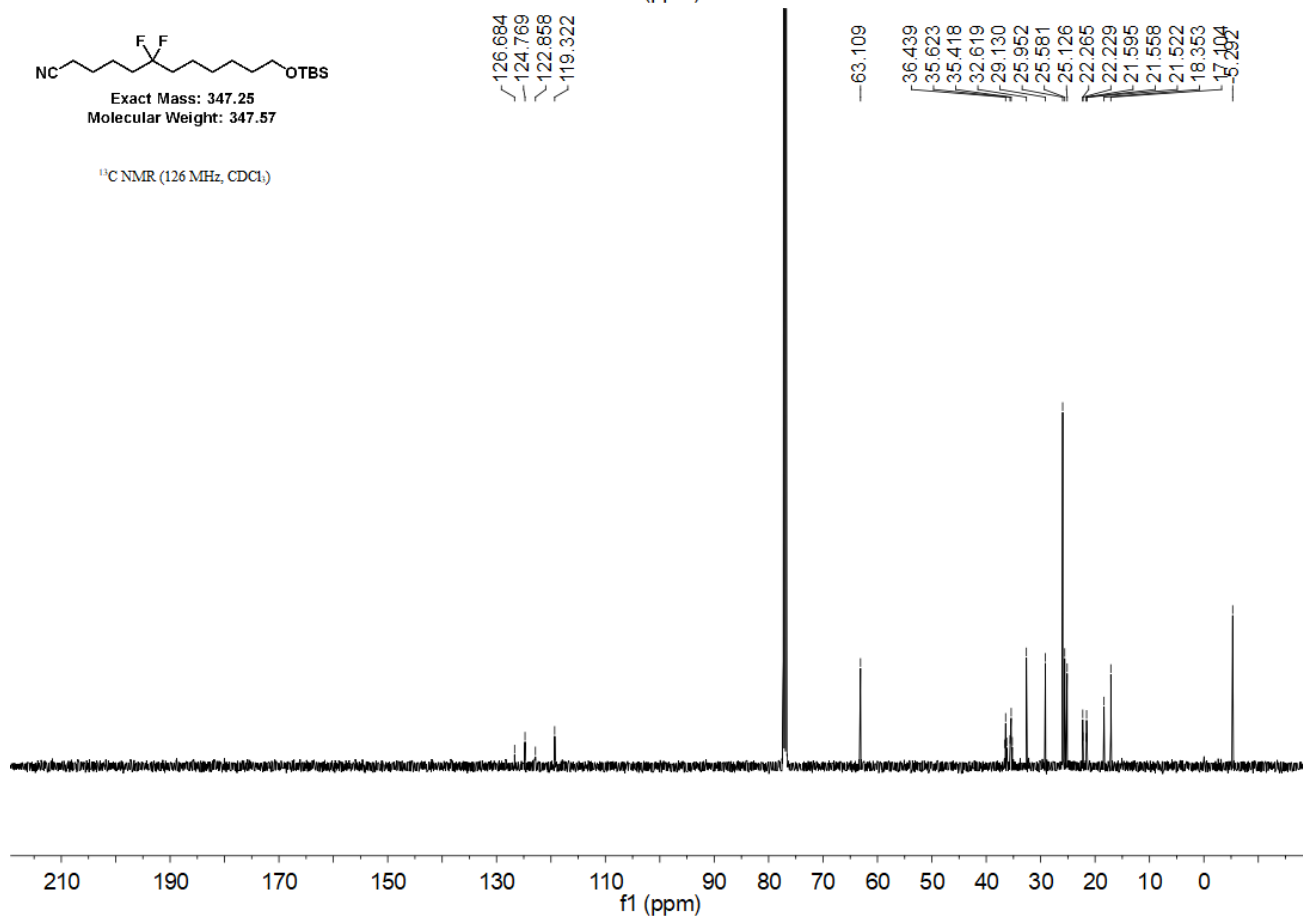

# **Ethyl 10-chloro-5,5-difluorodecanoate (8g)**

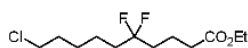

Exact Mass: 270.12  
Molecular Weight: 270.74

<sup>1</sup>H NMR (400 MHz, cdcl<sub>3</sub>)

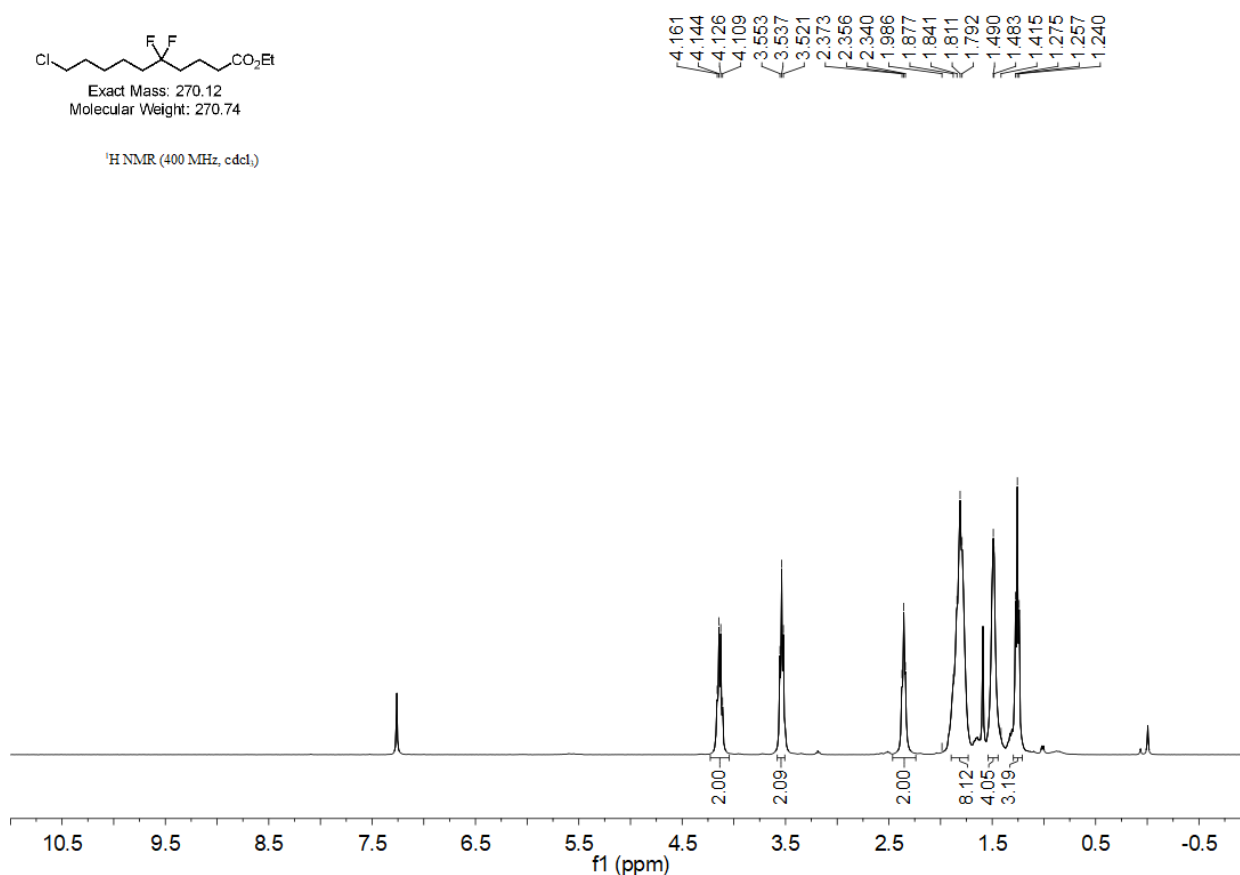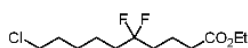

Exact Mass: 270.12  
Molecular Weight: 270.74

<sup>19</sup>F NMR (376 MHz, cdcl<sub>3</sub>)

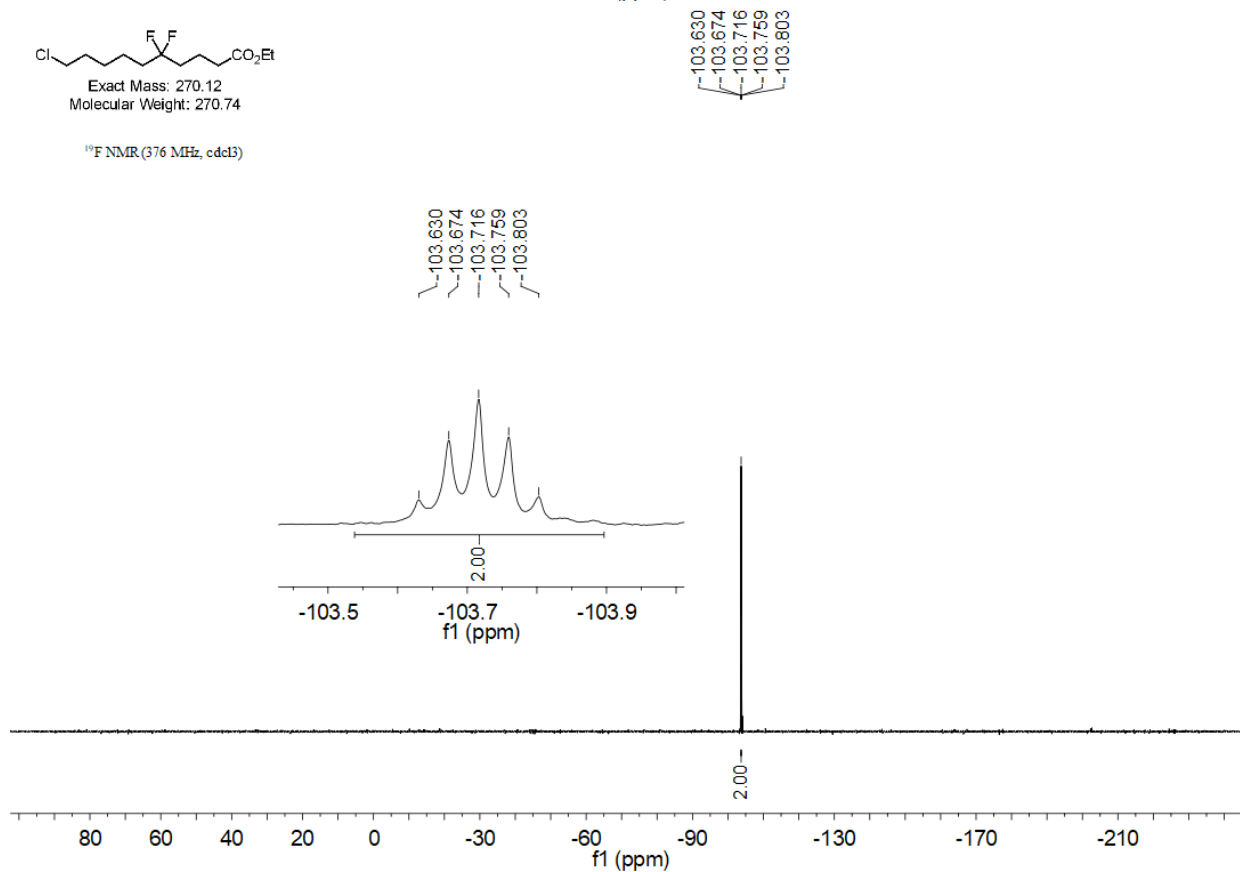

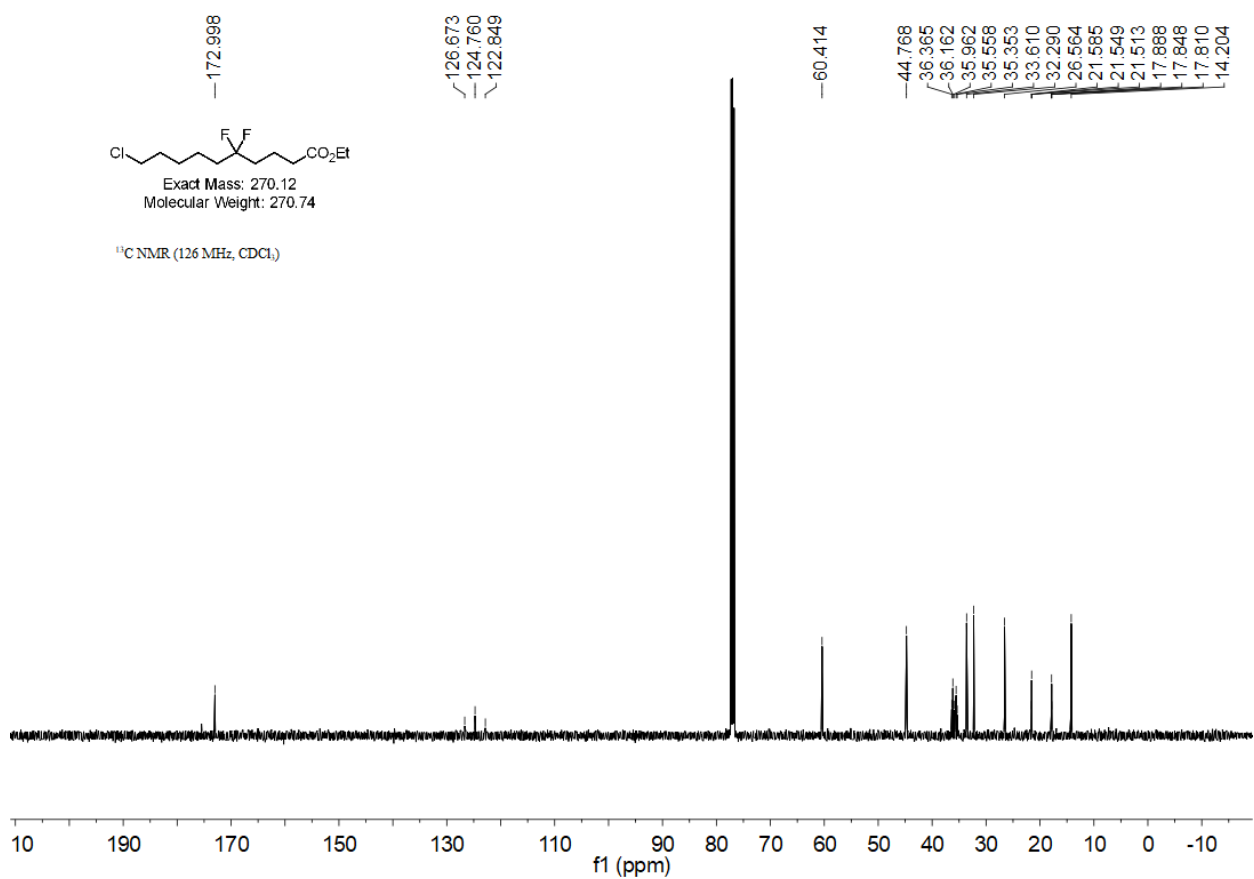

### 11-Chloro-6,6-difluoroundecanenitrile (8h)

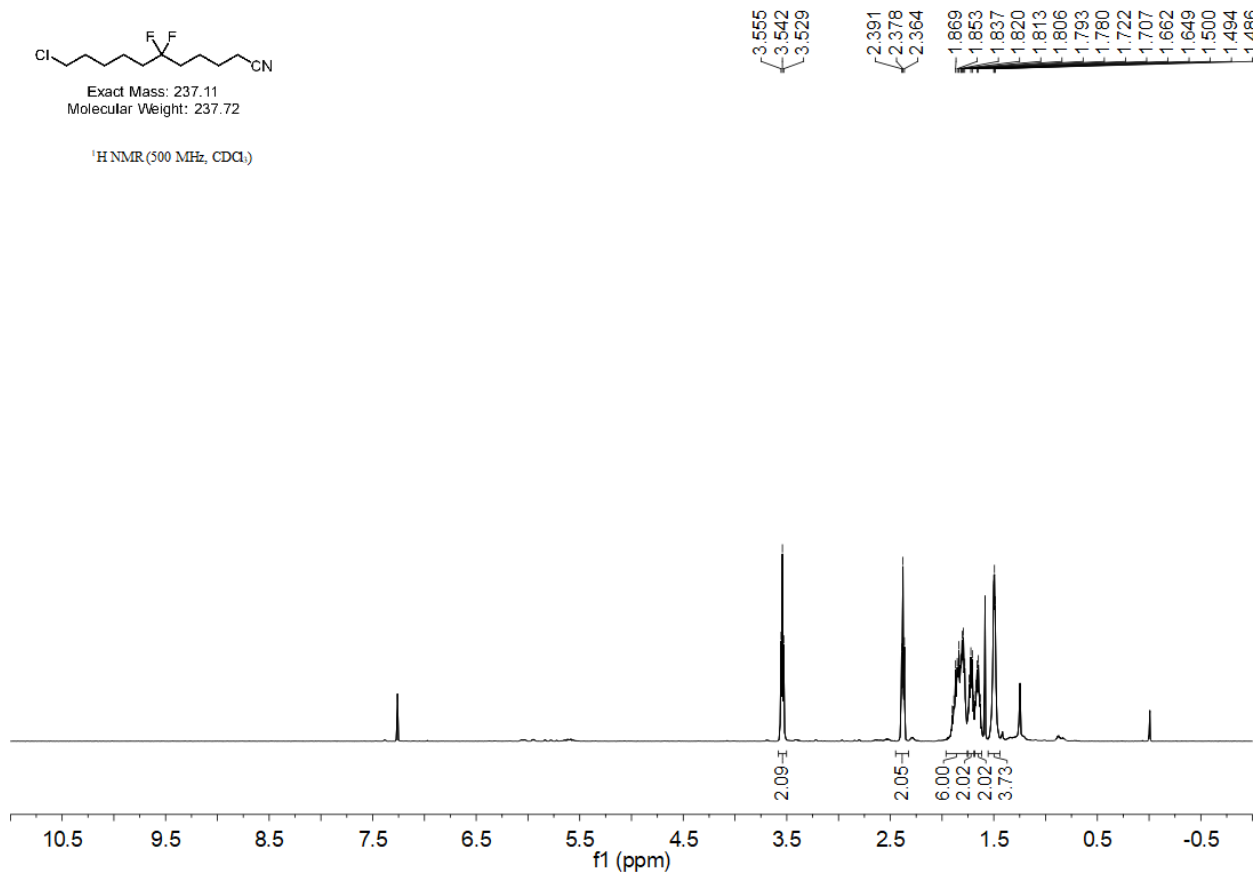

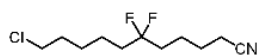

Exact Mass: 237.11  
Molecular Weight: 237.72

$^{19}\text{F}$  NMR (376 MHz,  $\text{cdCl}_3$ )

98.593  
98.636  
98.680  
98.724  
98.769

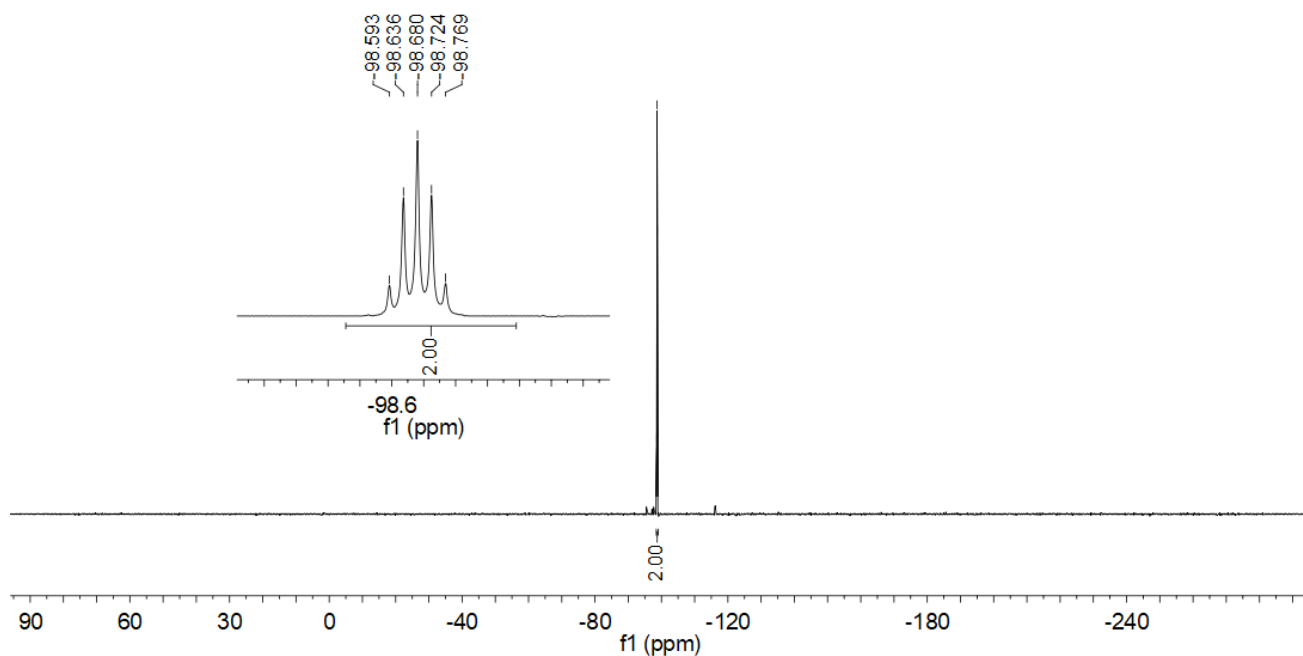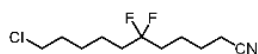

Exact Mass: 237.11  
Molecular Weight: 237.72

$^{13}\text{C}$  NMR (126 MHz,  $\text{CDCl}_3$ )

126.454  
124.539  
122.627  
119.298

44.751  
36.507  
36.305  
36.104  
35.721  
35.515  
35.309  
32.260  
26.538  
25.073  
21.577  
21.542  
21.517  
21.482  
17.088

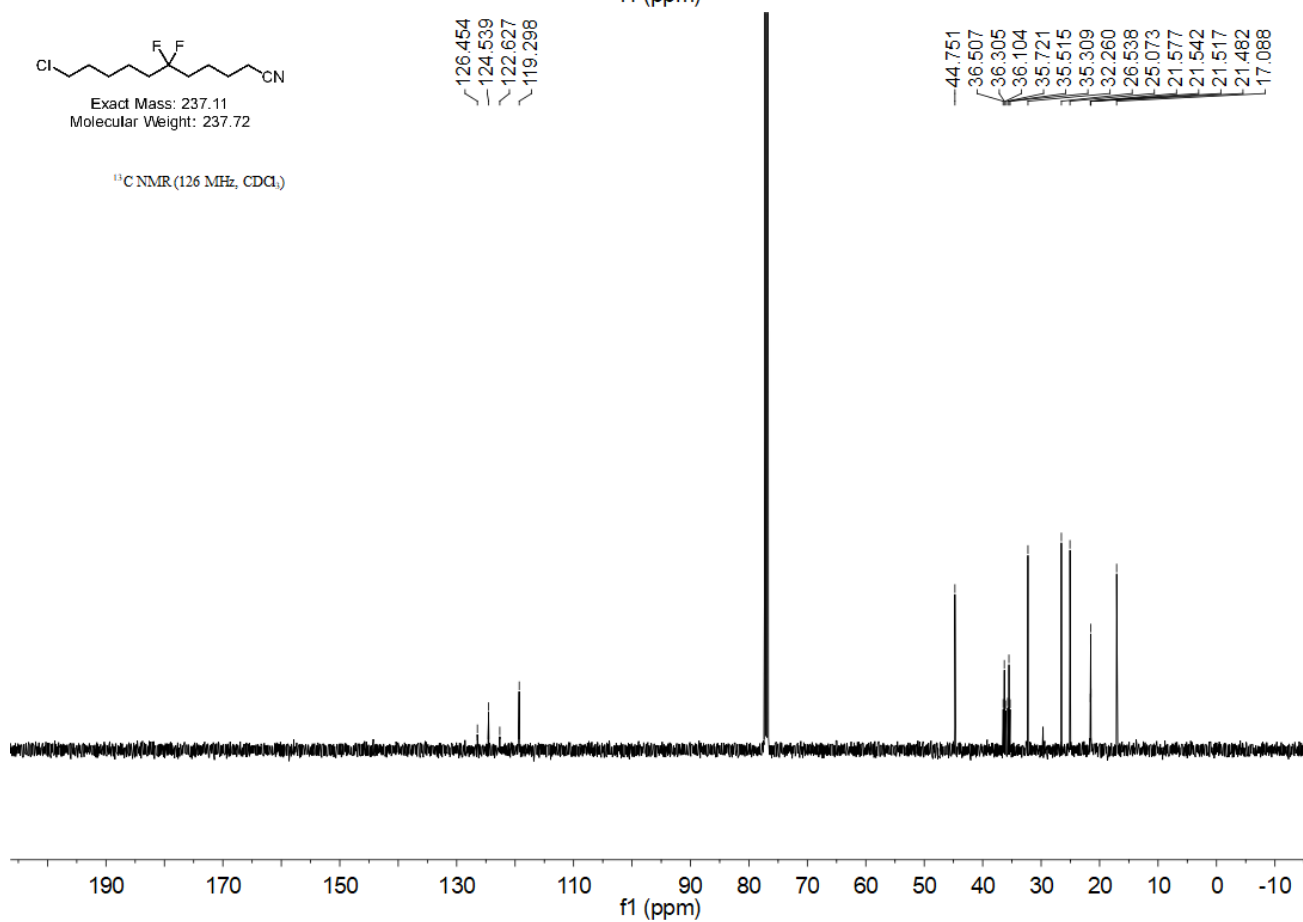

# 11-Bromo-5,5-difluoroundecyl acetate (8i)

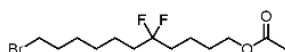

Chemical Formula:  $C_{13}H_{23}BrF_2O_2$   
Exact Mass: 328.08

$^1H$  NMR (400 MHz,  $cdCl_3$ )

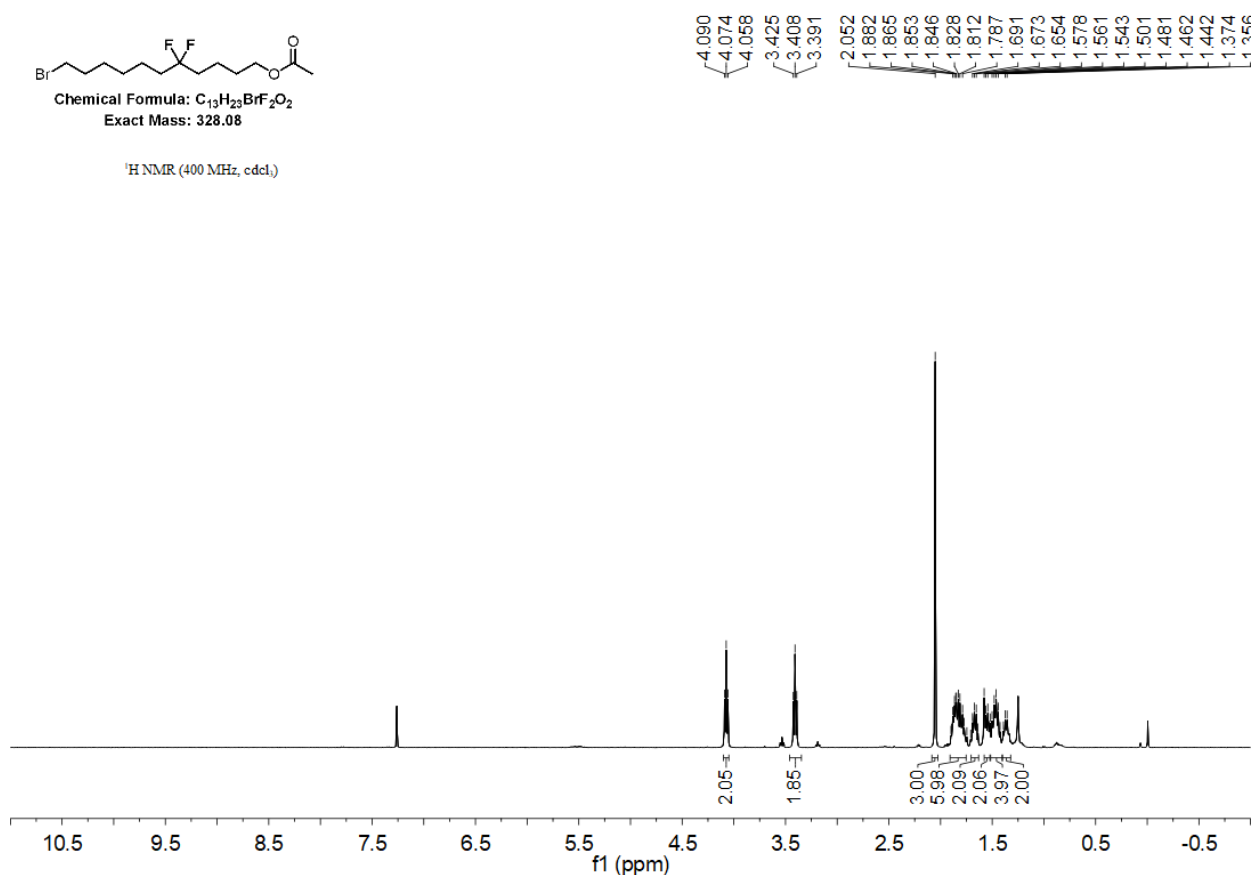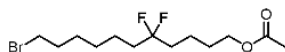

Chemical Formula:  $C_{13}H_{23}BrF_2O_2$   
Exact Mass: 328.08

$^{19}F$  NMR (376 MHz,  $cdCl_3$ )

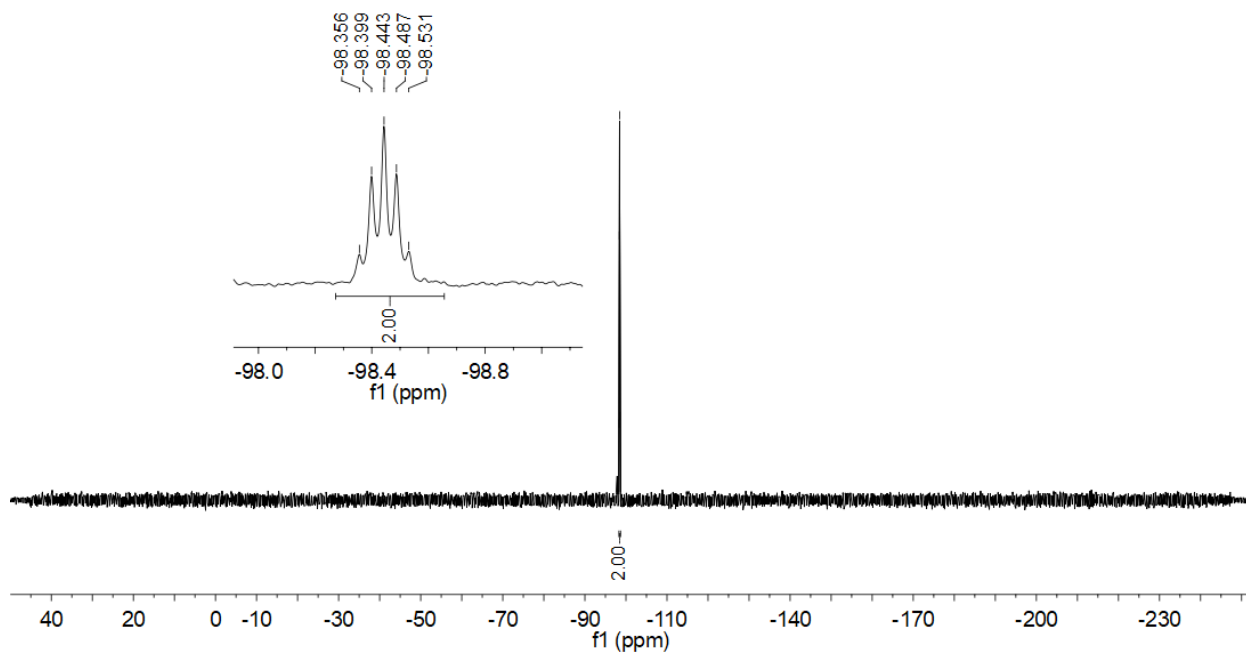

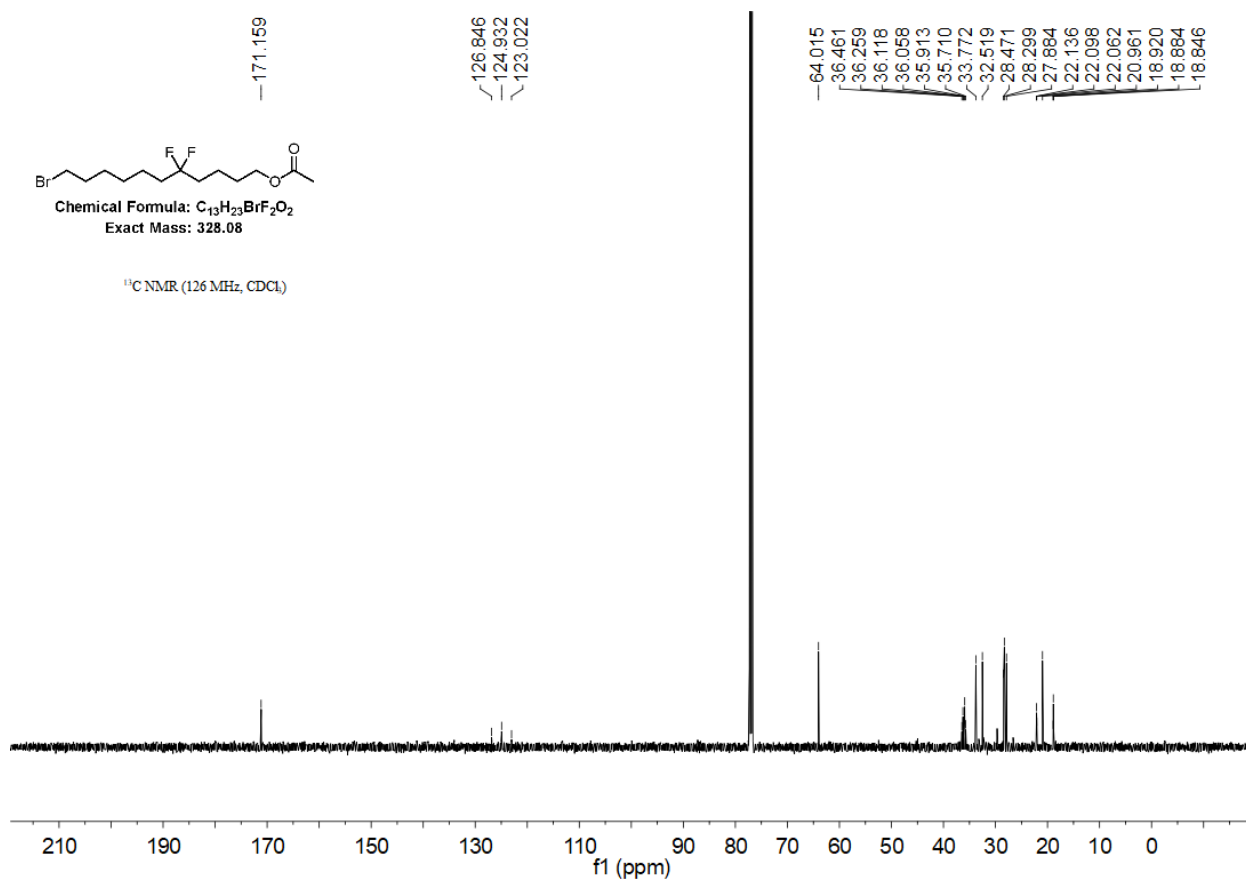

### 8-Bromo-2,2-difluorooctyl benzoate (8j)

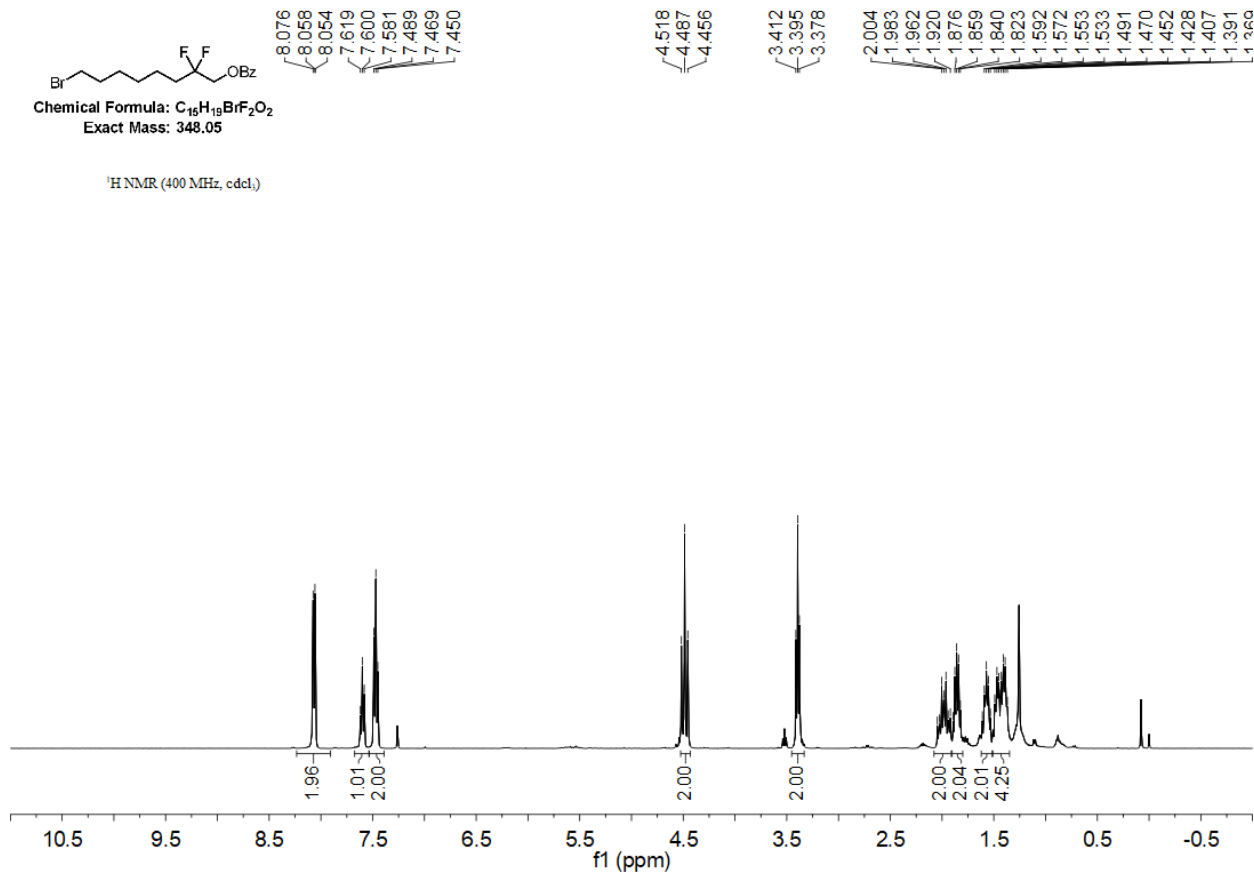

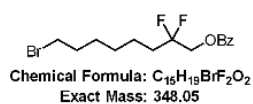

$^{19}F$  NMR (376 MHz,  $cdCl_3$ )

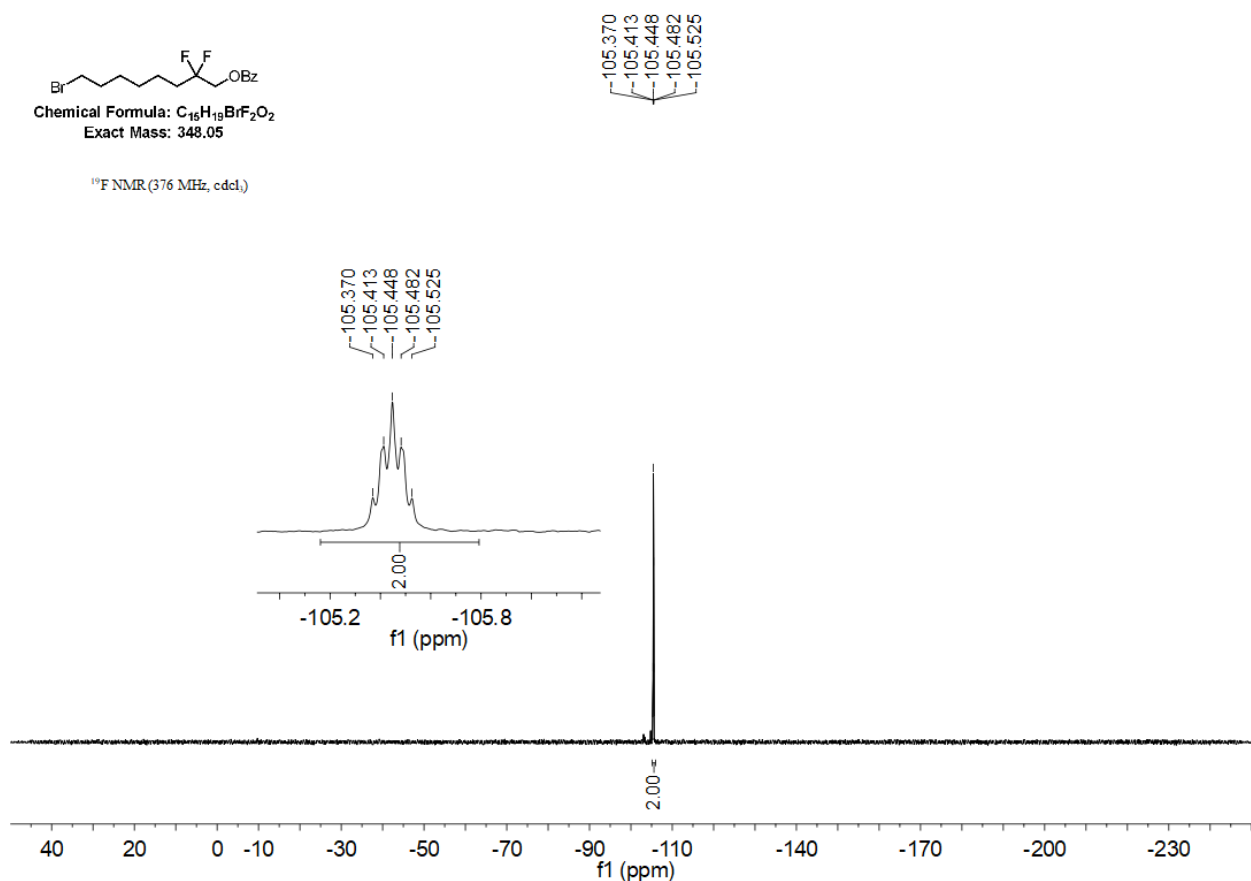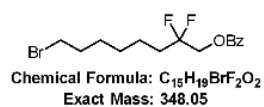

$^{13}C$  NMR (126 MHz,  $CDCl_3$ )

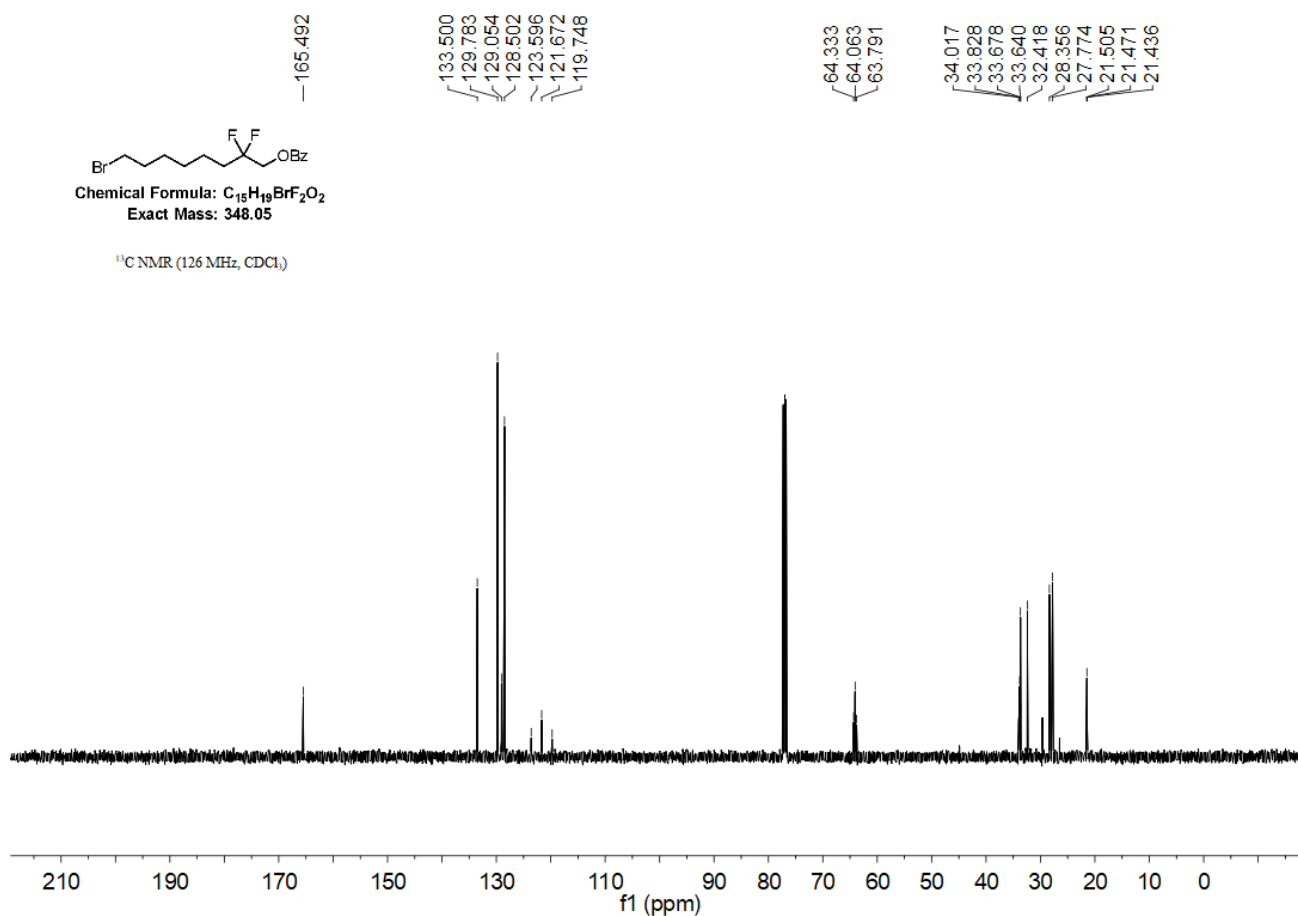



# 2,2-Difluoro-5-(4,4,5,5-tetramethyl-1,3,2-dioxaborolan-2-yl)pentyl benzoate (8k)

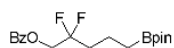

Chemical Formula:  $C_{12}H_{13}F_2O_2$   
Exact Mass: 227.09

$^1H$  NMR (400 MHz,  $cdCl_3$ )

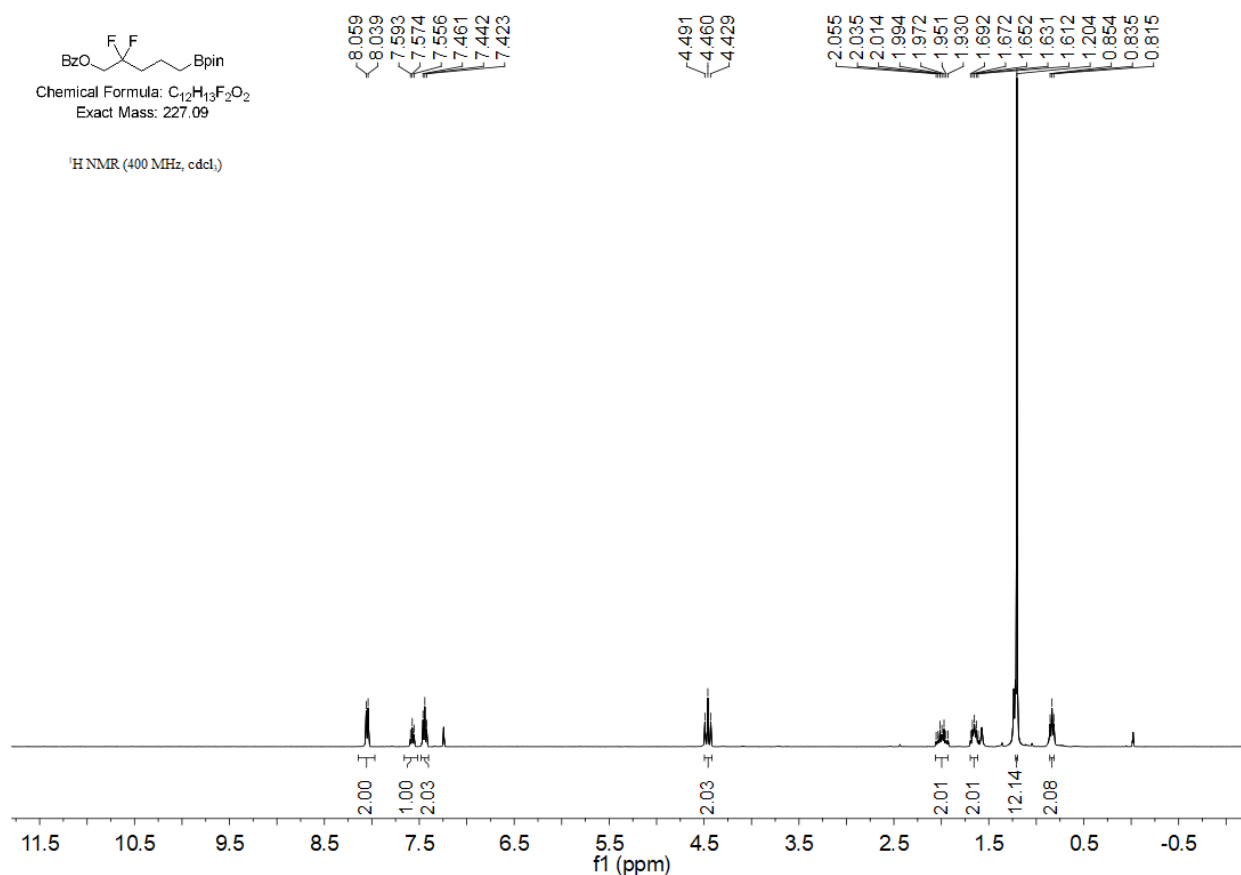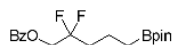

Chemical Formula:  $C_{12}H_{13}F_2O_2$   
Exact Mass: 227.09

$^{19}F$  NMR (376 MHz,  $cdCl_3$ )

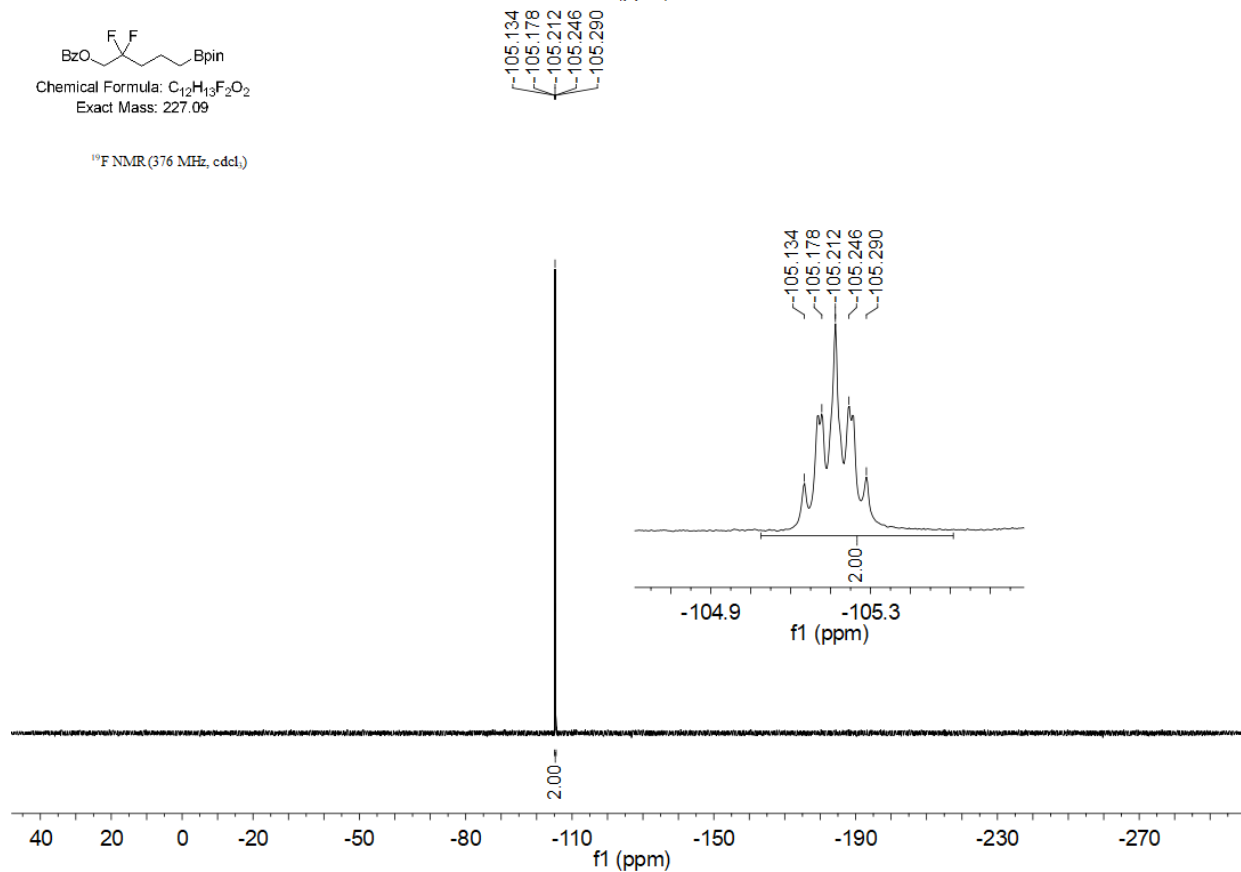

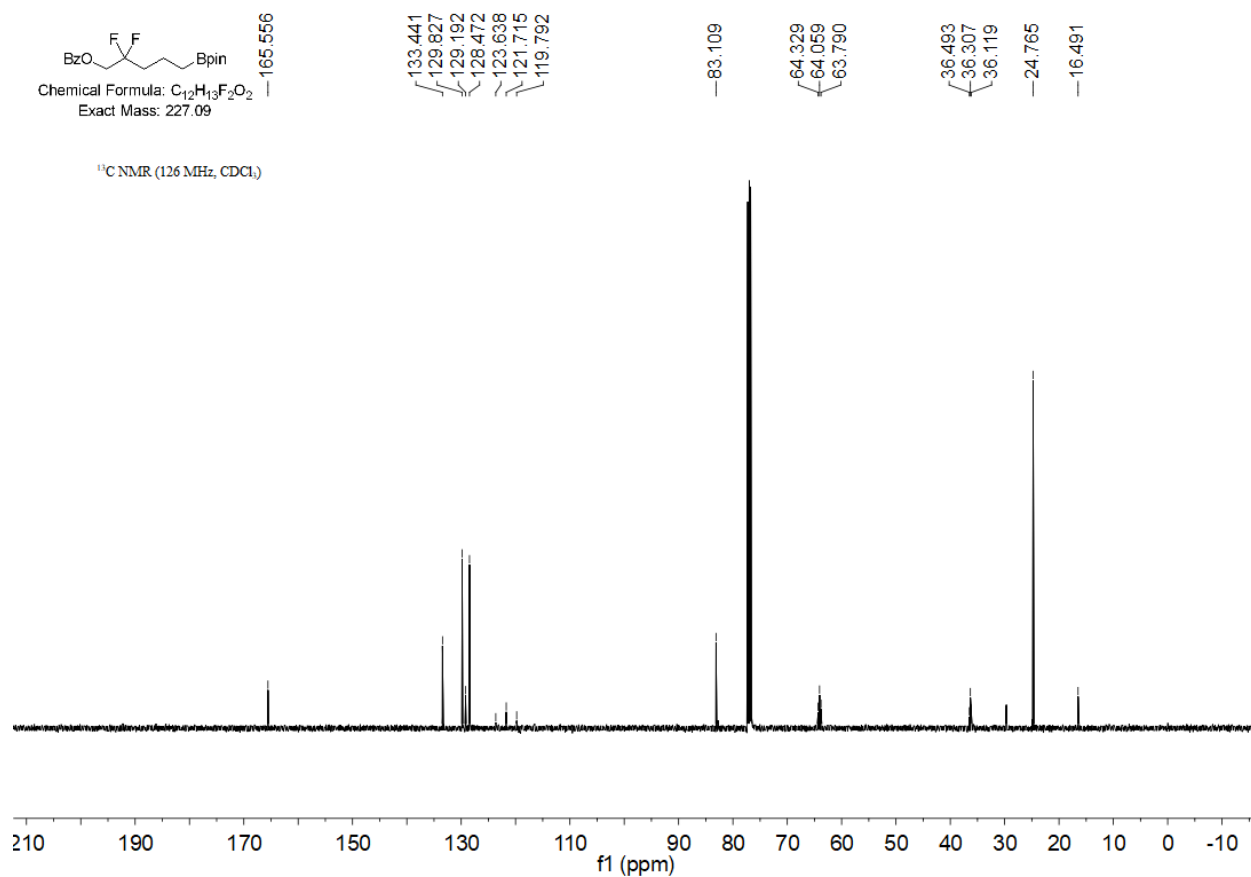

## 2-((1S,4R)-Bicyclo[2.2.1]heptan-2-yl)-2,2-difluoroethyl benzoate (8l)

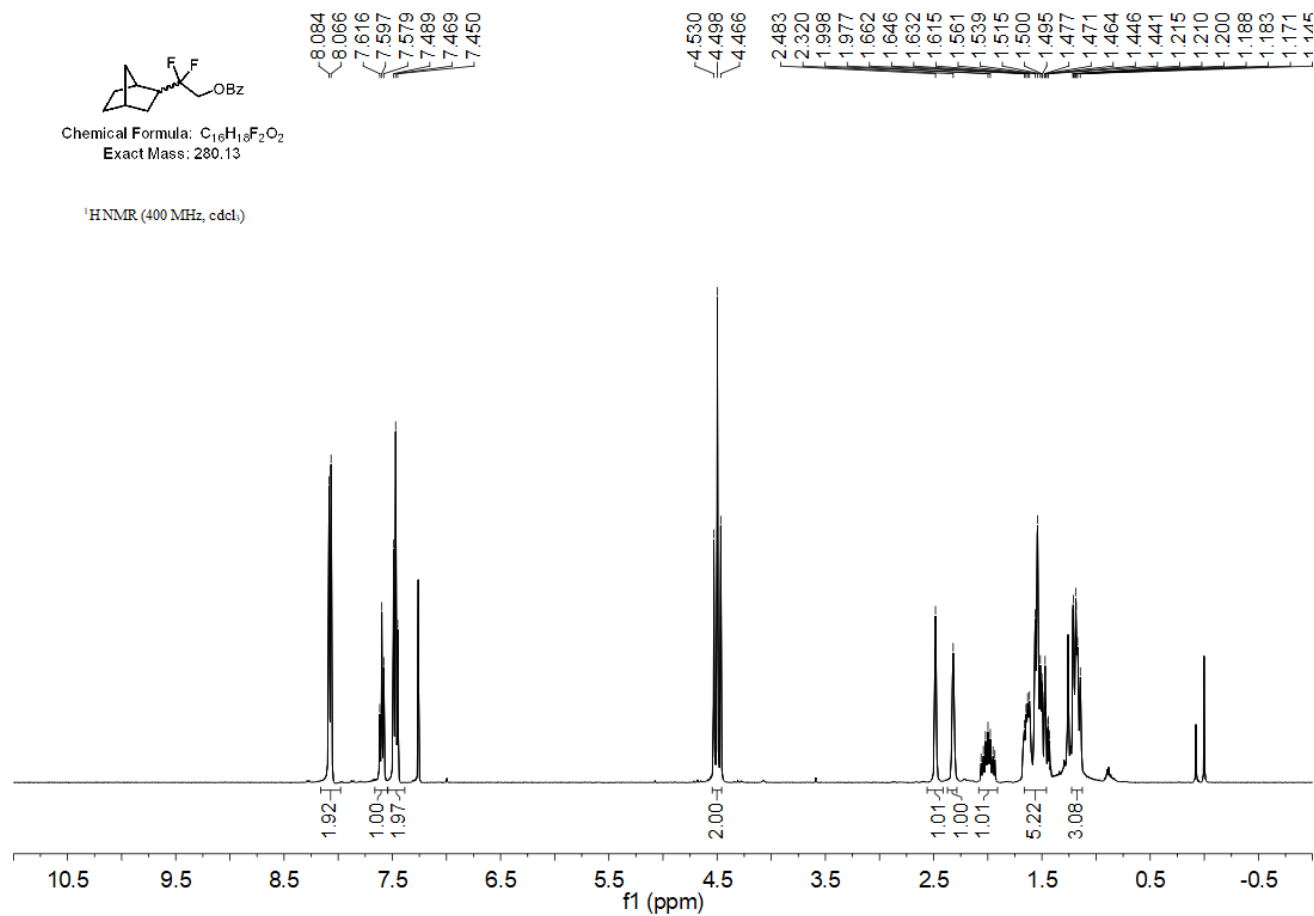

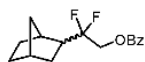

Chemical Formula:  $C_{16}H_{18}F_2O_2$   
Exact Mass: 280.13

$^{19}F$  NMR (376 MHz,  $cdCl_3$ )

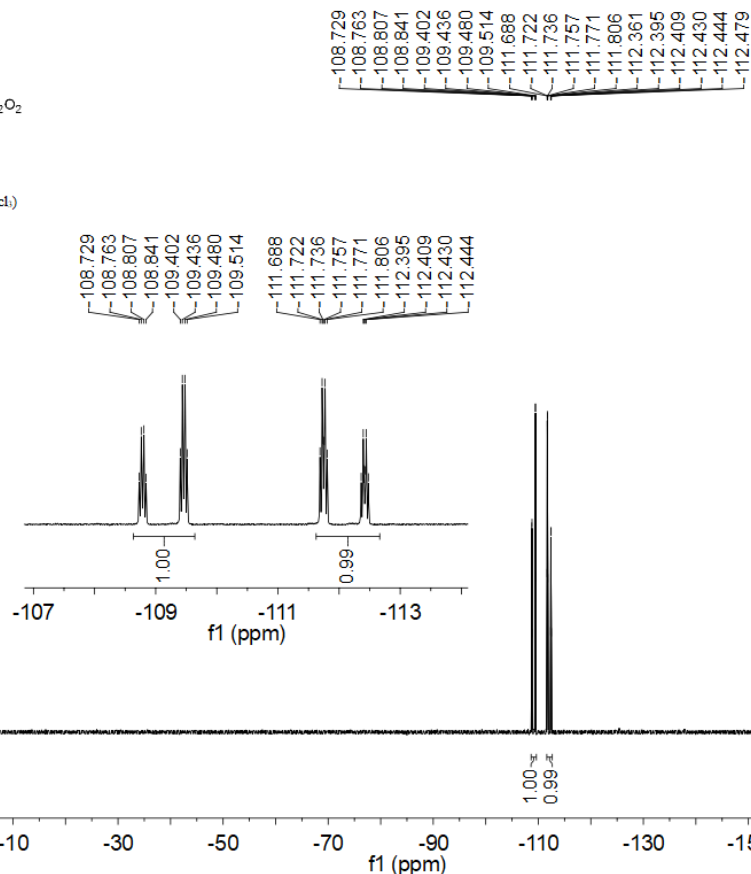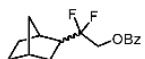

Chemical Formula:  $C_{16}H_{18}F_2O_2$   
Exact Mass: 280.13

$^{13}C$  NMR (101 MHz,  $cdCl_3$ )

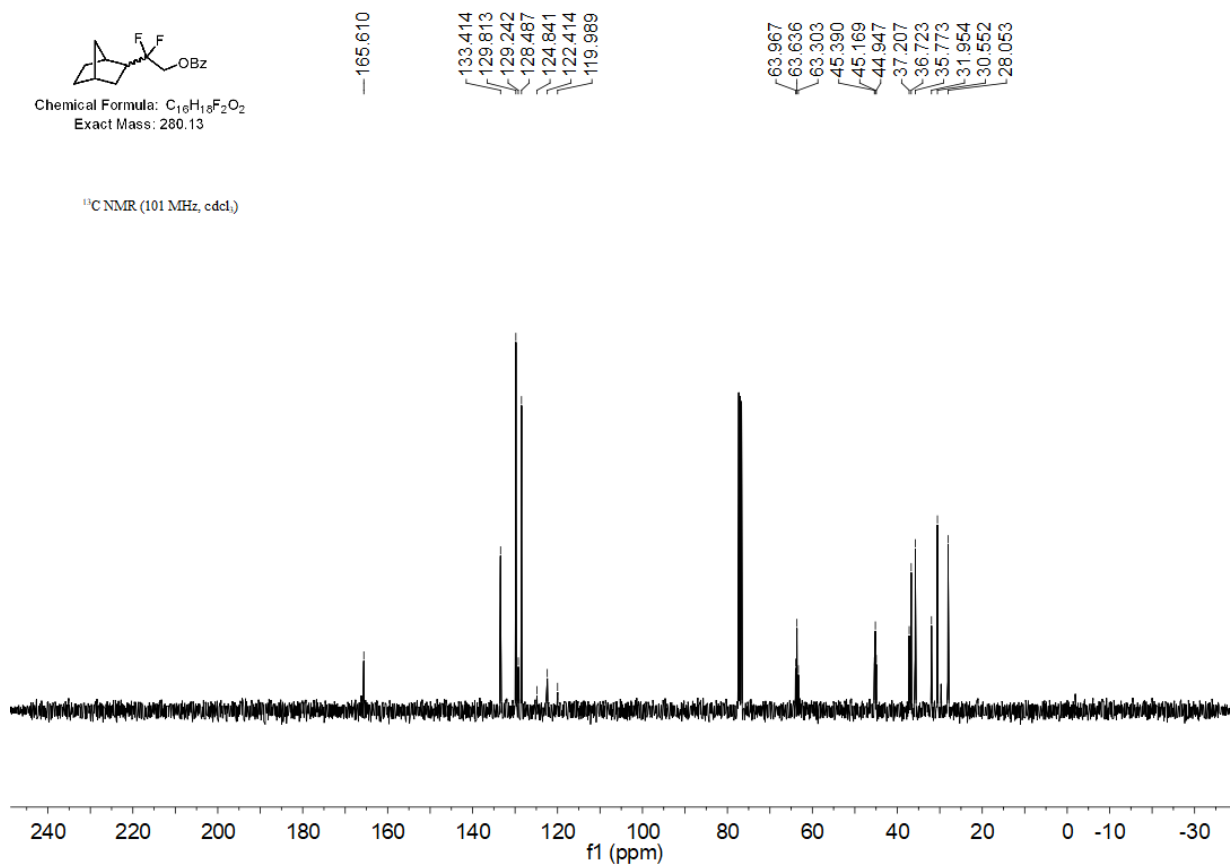

# Mesityl 2,2-difluoro-5-(4,4,5,5-tetramethyl-1,3,2-dioxaborolan-2-yl)pentanoate (8m)

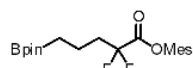

Chemical Formula:  $C_{14}H_{17}F_2O_2$   
Exact Mass: 255.1197

$^1H$  NMR (400 MHz,  $cdCl_3$ )

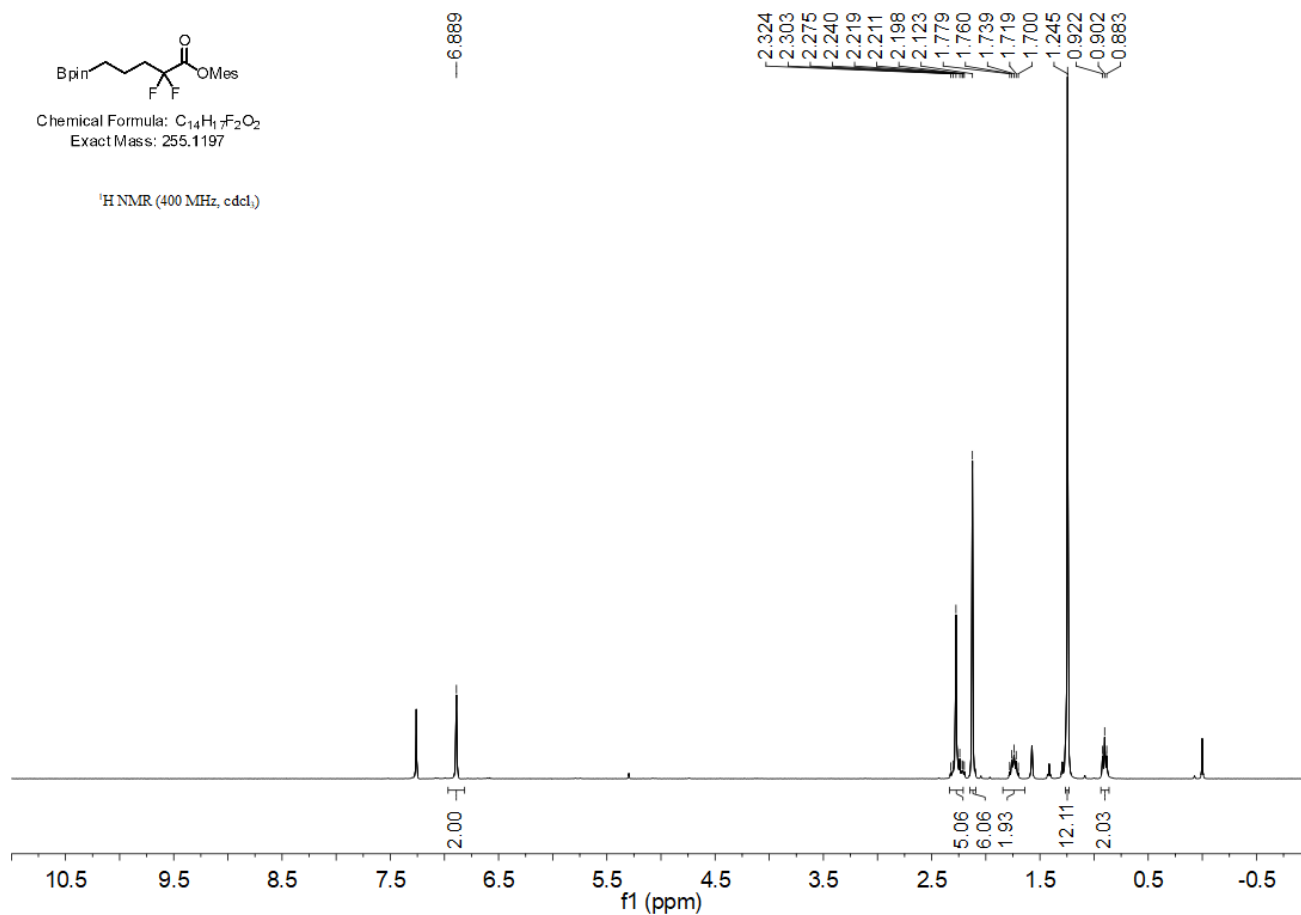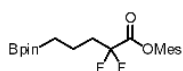

Chemical Formula:  $C_{14}H_{17}F_2O_2$   
Exact Mass: 255.1197

$^{19}F$  NMR (376 MHz,  $cdCl_3$ )

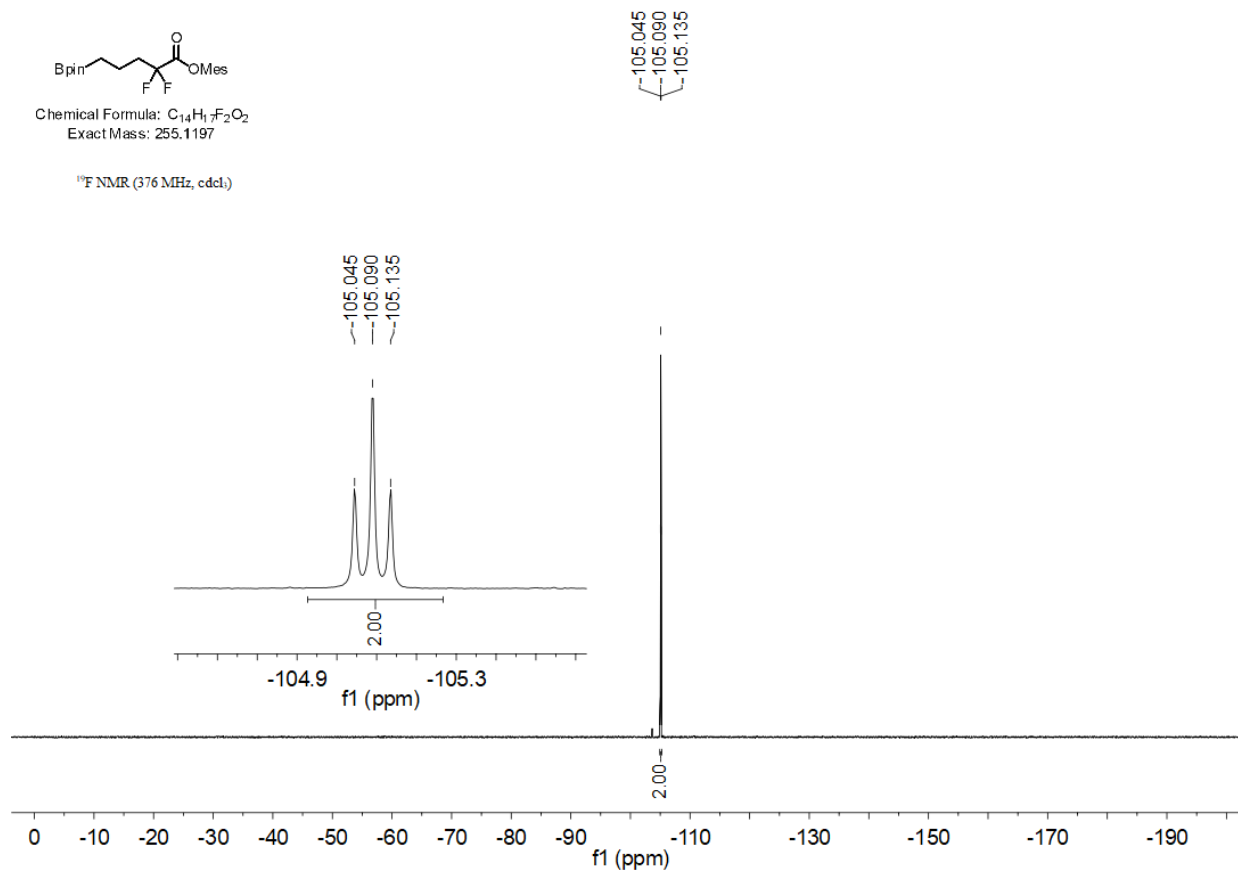

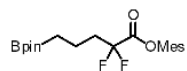

Chemical Formula:  $C_{14}H_{17}F_2O_2$   
Exact Mass: 255.1197

$^{13}C$  NMR (126 MHz,  $CDCl_3$ )

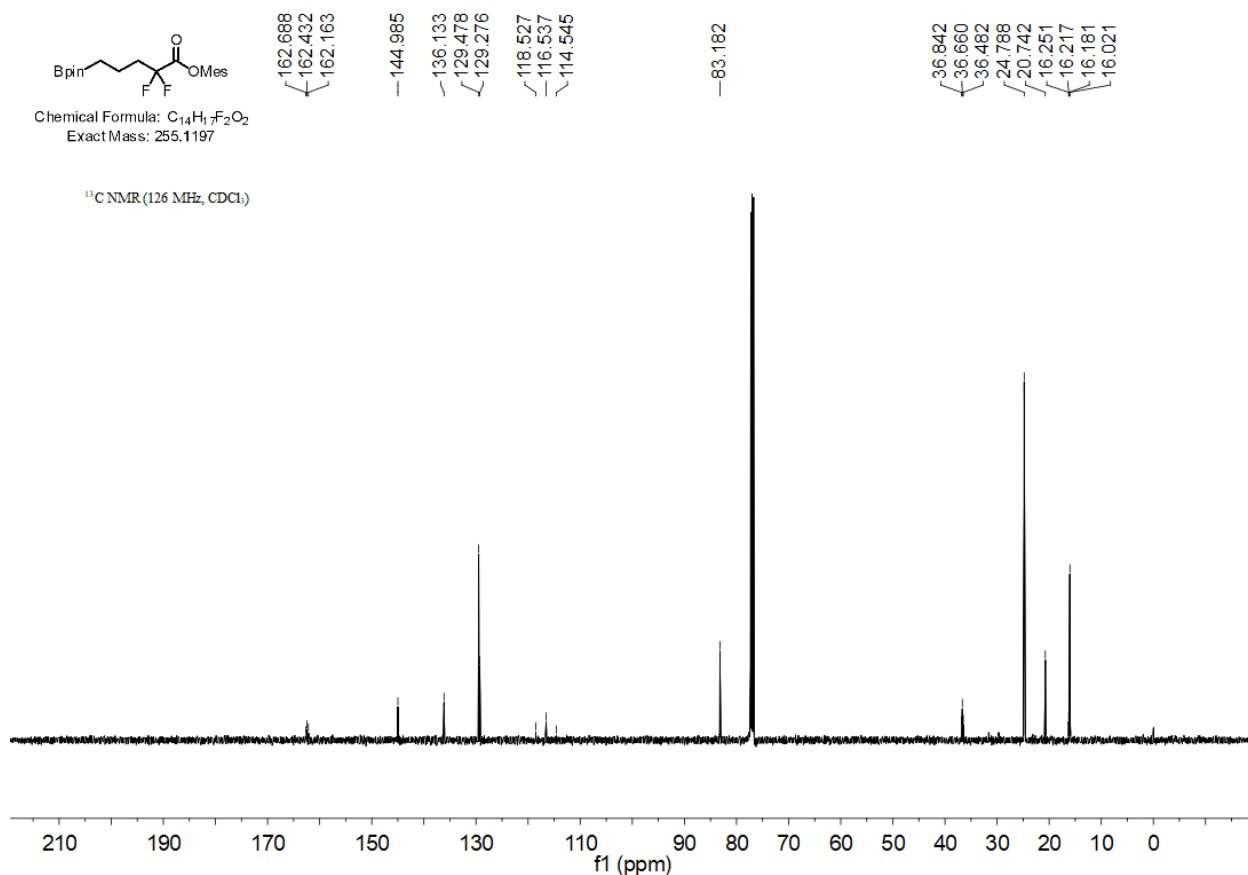

## Mesityl 5-cyclohexyl-2,2-difluoropentanoate (8n)

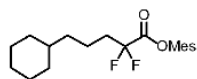

Chemical Formula:  $C_{20}H_{28}F_2O_2$   
Exact Mass: 338.2057

$^1H$  NMR (400 MHz,  $cdcl_3$ )

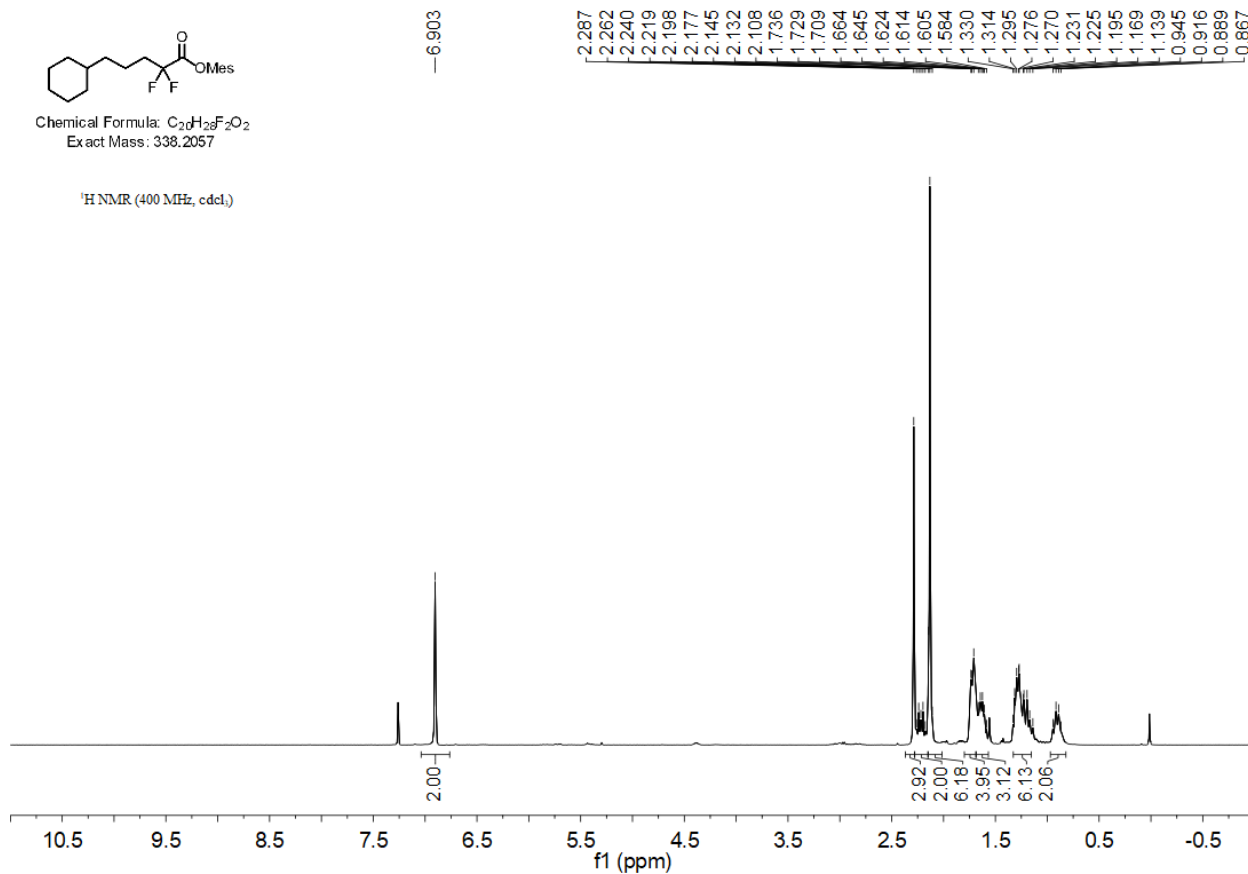

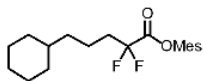

Chemical Formula:  $C_{20}H_{28}F_2O_2$   
Exact Mass: 338.2057

$^{19}F$  NMR (376 MHz,  $cdCl_3$ )

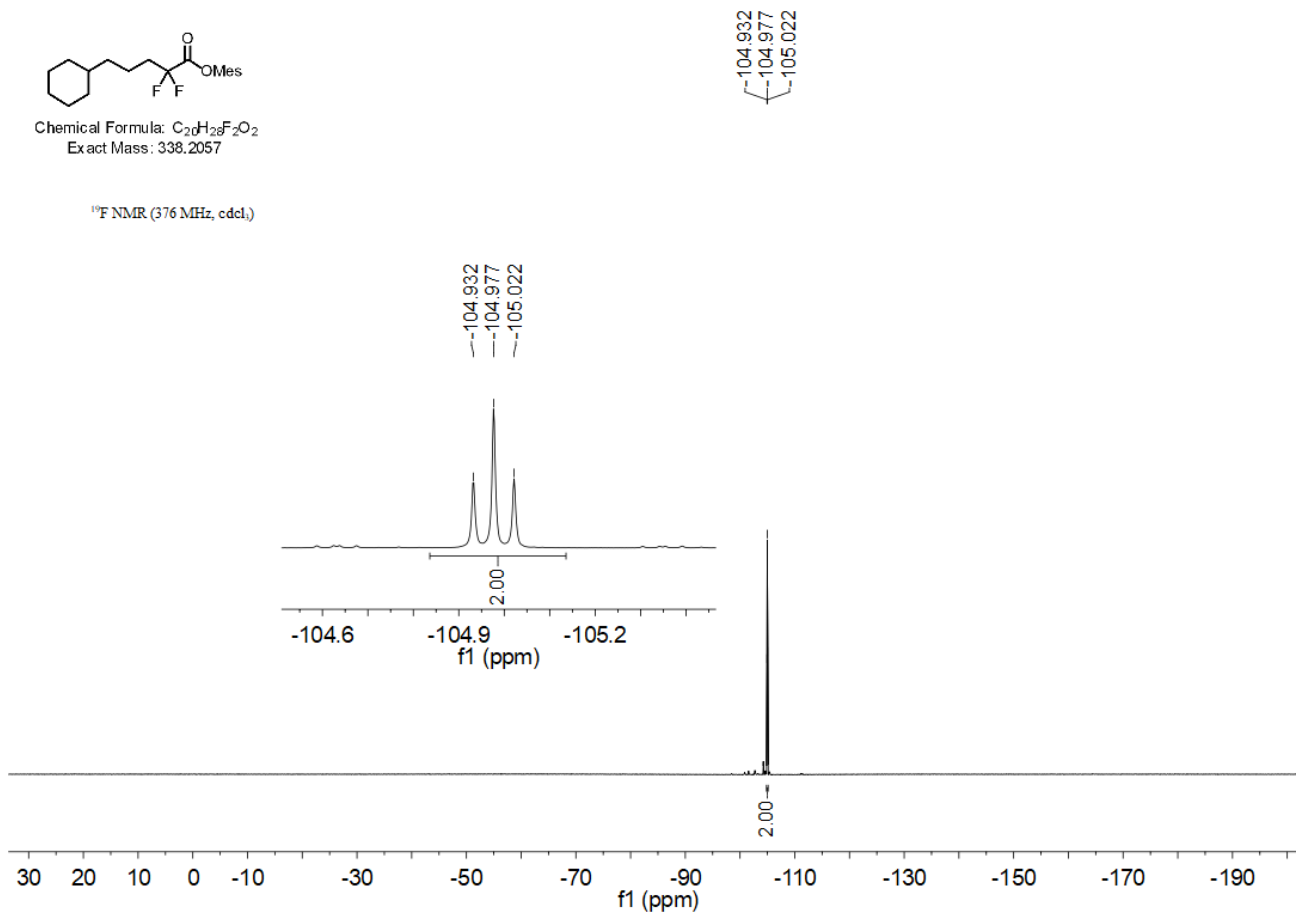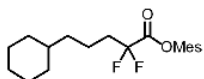

Chemical Formula:  $C_{20}H_{28}F_2O_2$   
Exact Mass: 338.2057

$^{13}C$  NMR (101 MHz,  $cdCl_3$ )

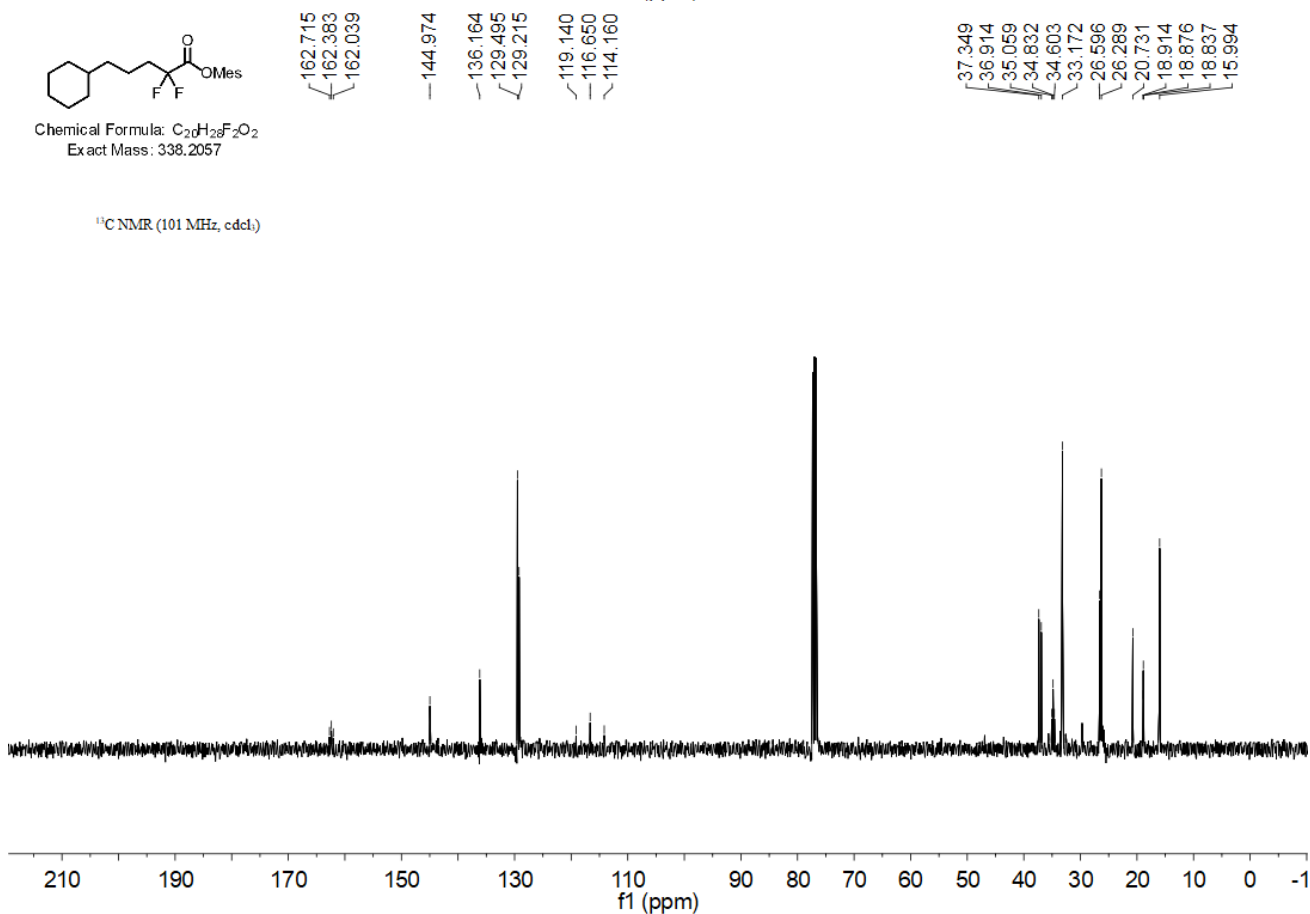

# Mesityl 8-((tert-butyldimethylsilyl)oxy)-2,2-difluorooctanoate (8o)

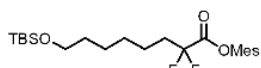

Chemical Formula:  $C_{23}H_{38}F_2O_3Si$   
Exact Mass: 428.2558

$^1H$  NMR (400 MHz,  $cdCl_3$ )

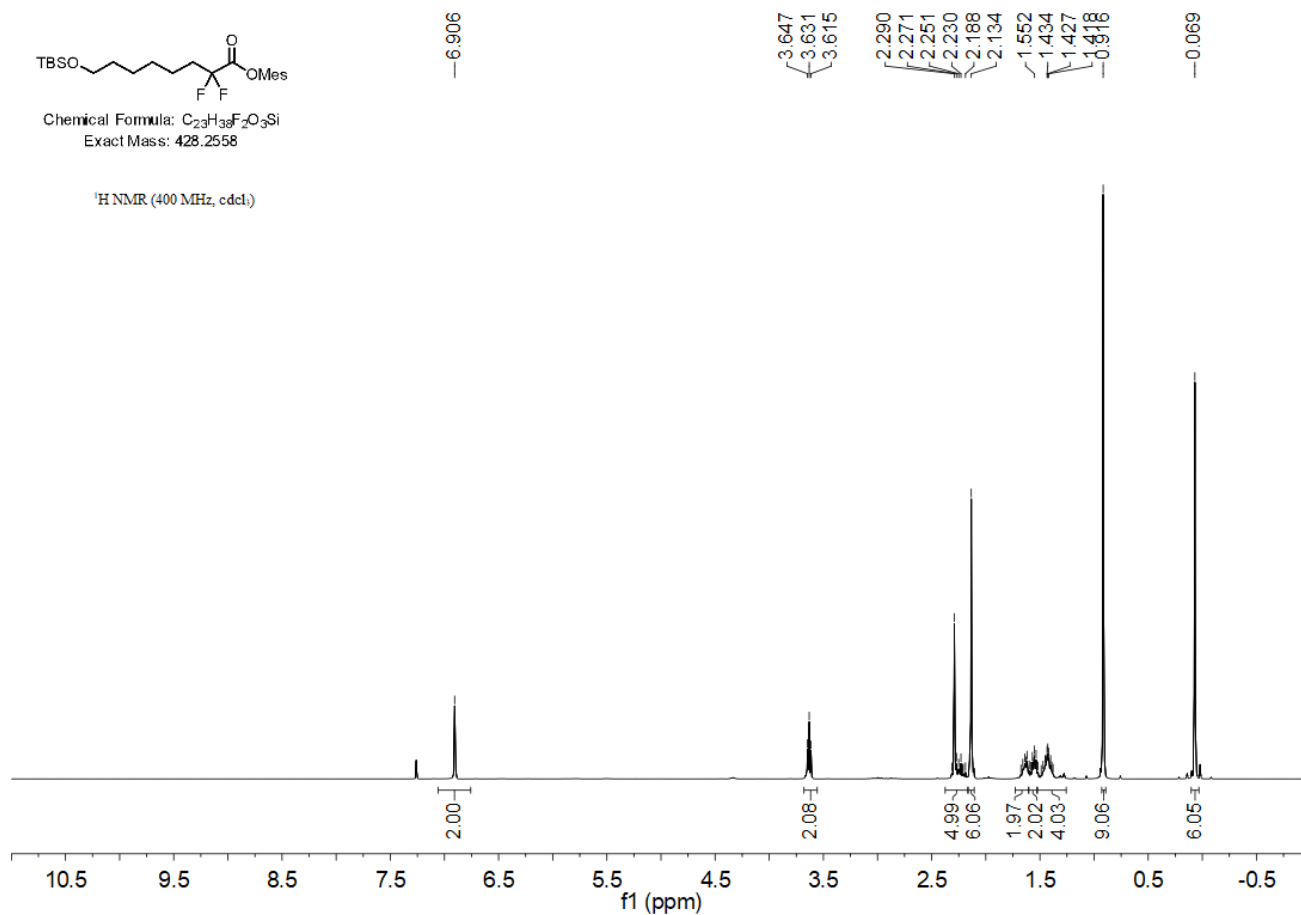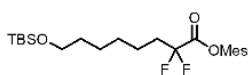

Chemical Formula:  $C_{23}H_{38}F_2O_3Si$   
Exact Mass: 428.2558

$^{19}F$  NMR (376 MHz,  $cdCl_3$ )

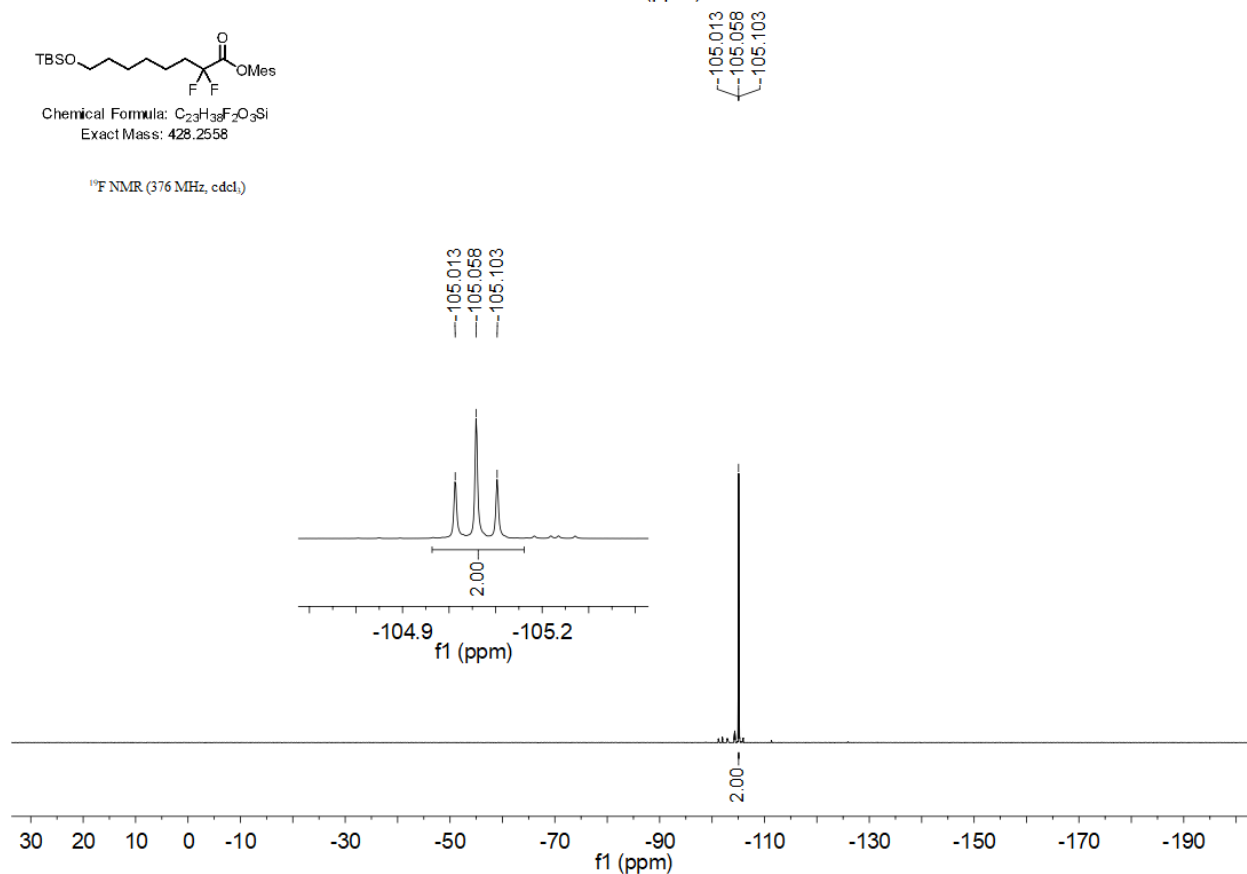

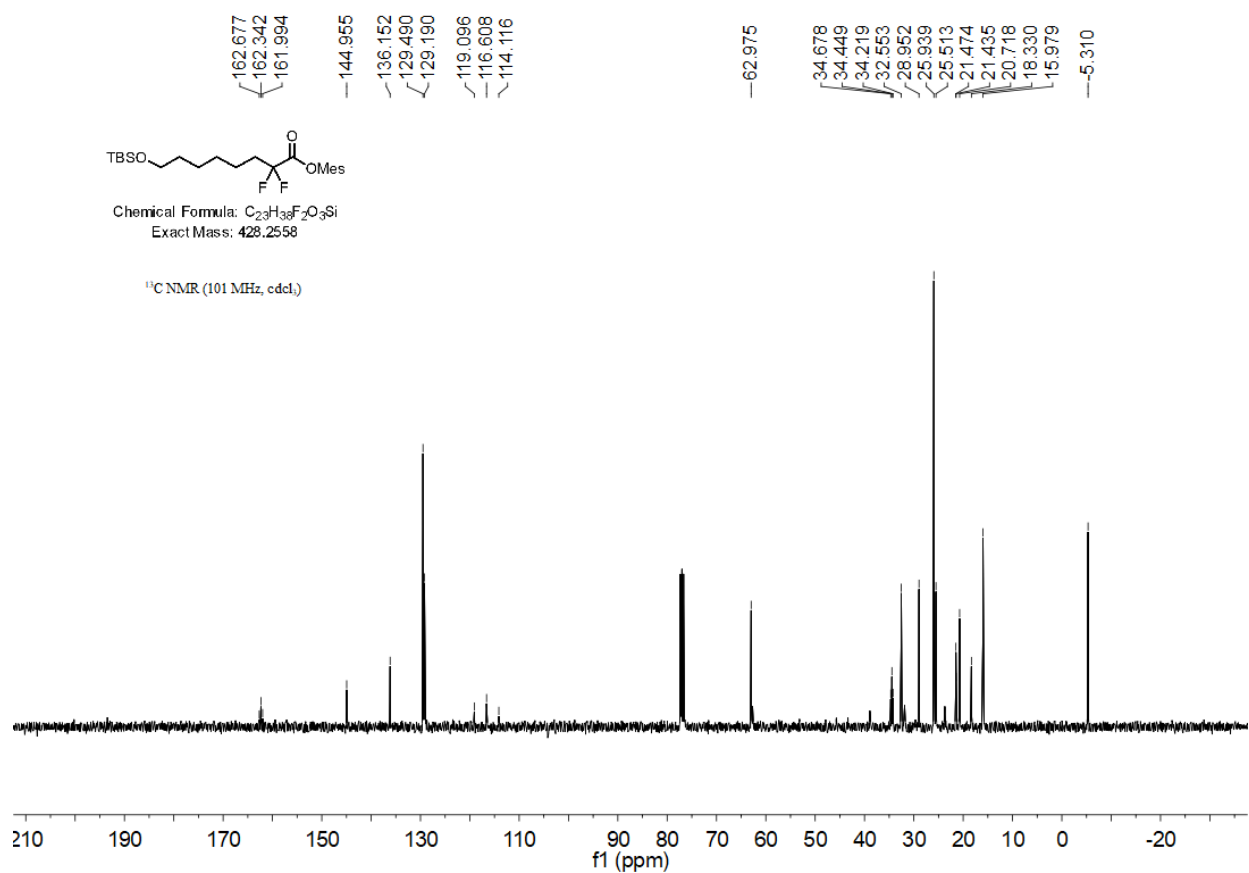

## Mesityl 2-cyclohexyl-2,2-difluoroacetate (8p)

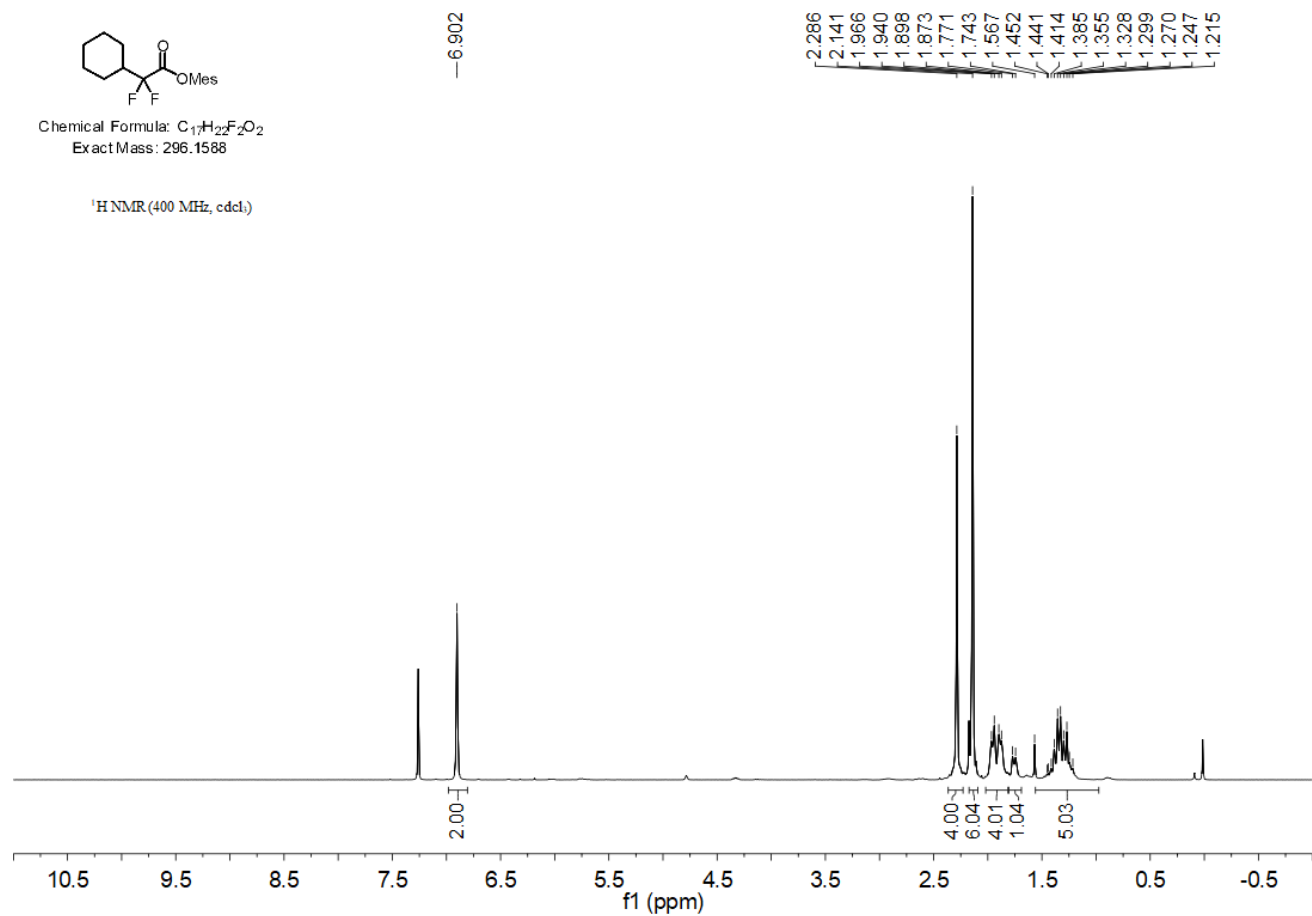



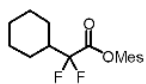

Chemical Formula:  $C_{11}H_{22}F_2O_2$   
Exact Mass: 296.1588

$^{19}F$  NMR (376 MHz,  $cdCl_3$ )

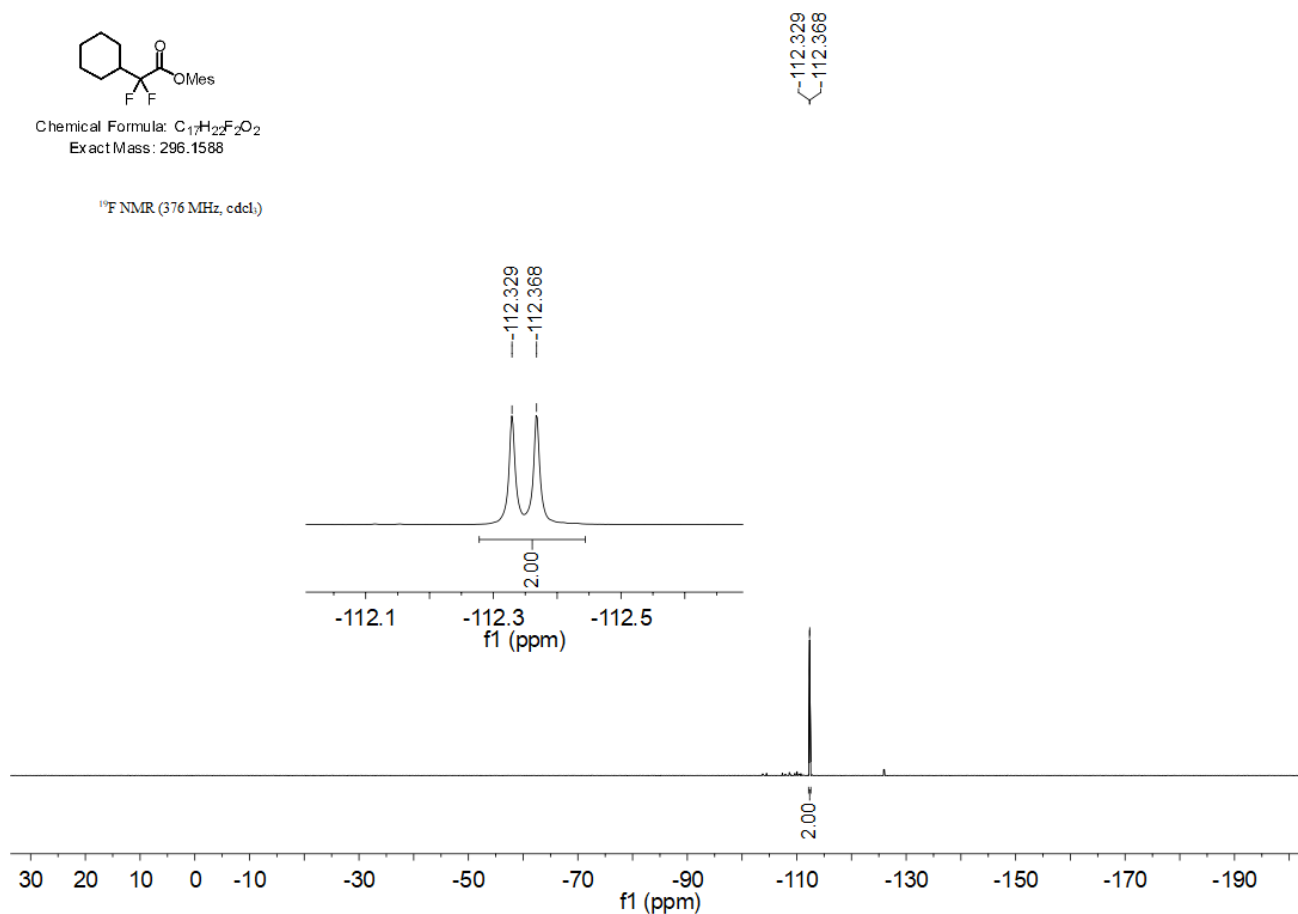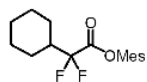

Chemical Formula:  $C_{11}H_{22}F_2O_2$   
Exact Mass: 296.1588

$^{13}C$  NMR (101 MHz,  $cdCl_3$ )

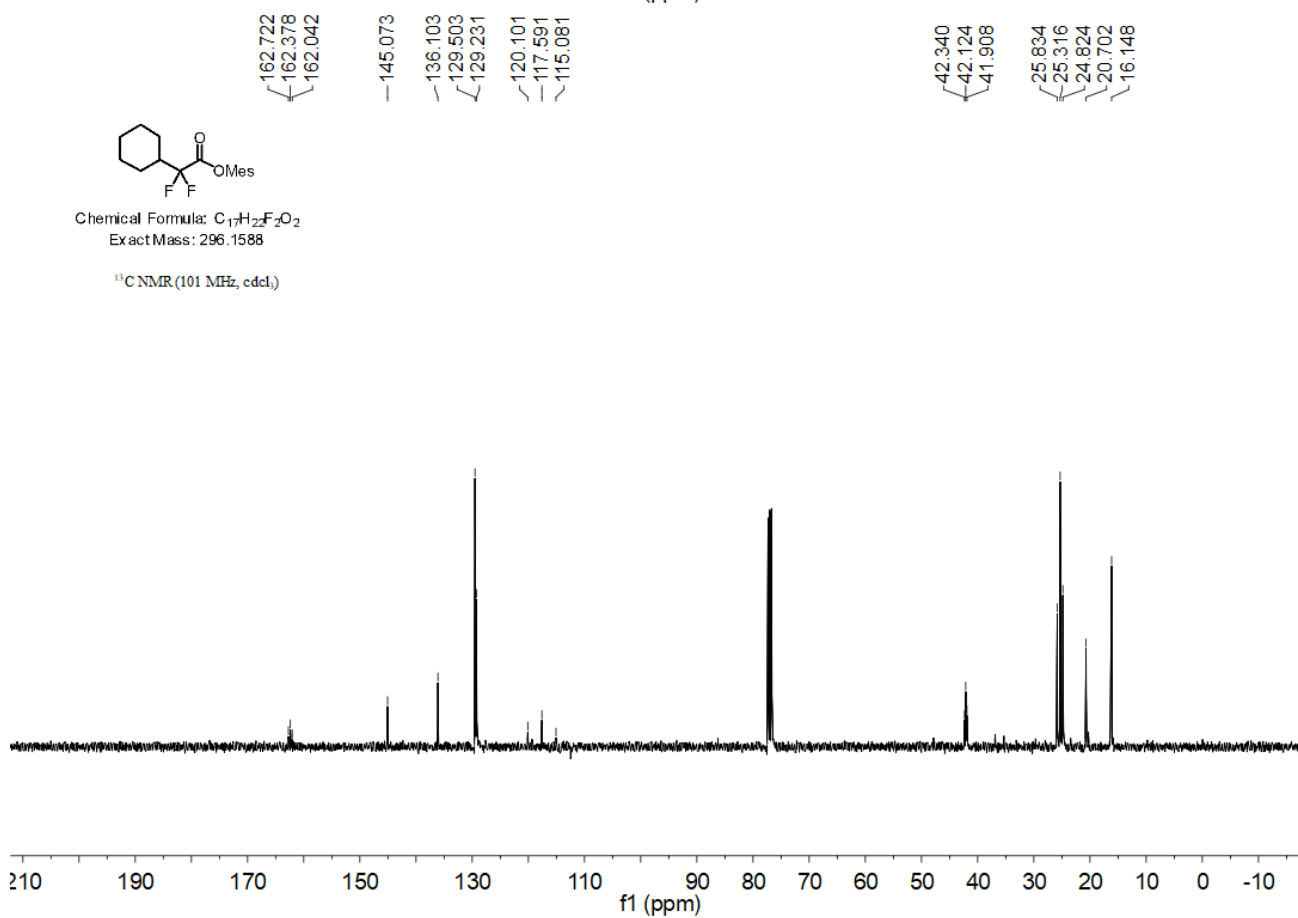

**Mesityl 2,2-difluoro-2-((1*S*,4*R*)-1,2,3,4-tetrahydro-1,4-epoxynaphthalen-2-yl)acetate (8q)**

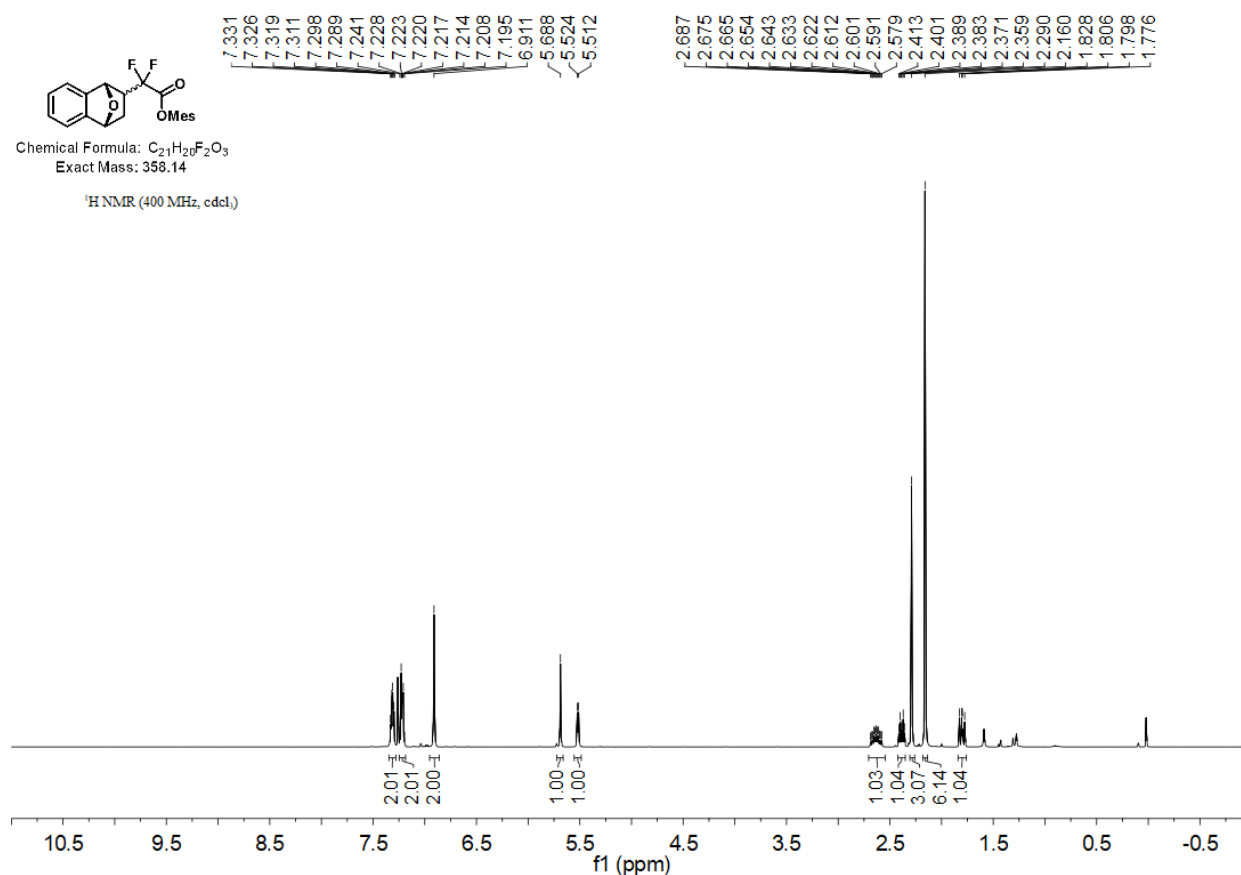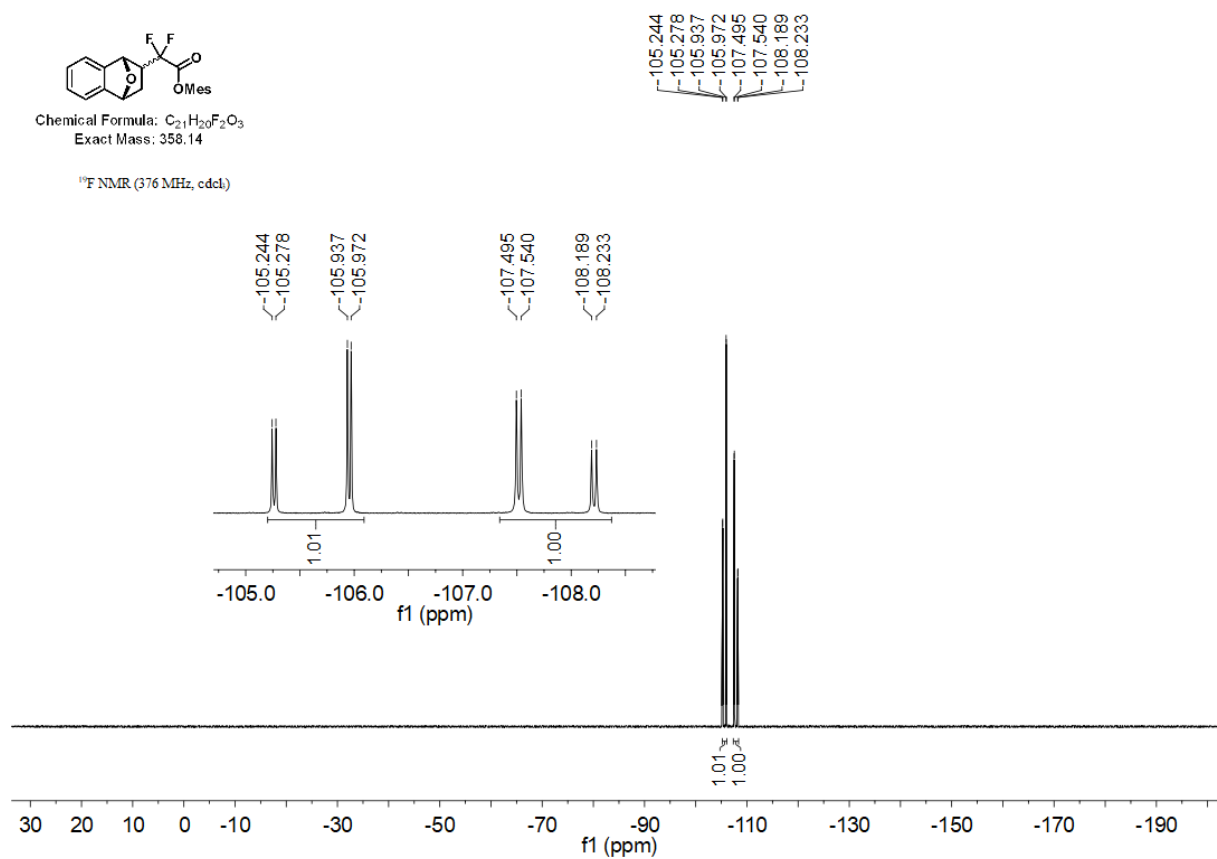

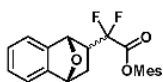

Chemical Formula:  $C_{21}H_{20}F_2O_3$   
Exact Mass: 358.14

$^{13}C$  NMR (101 MHz,  $cdCl_3$ )

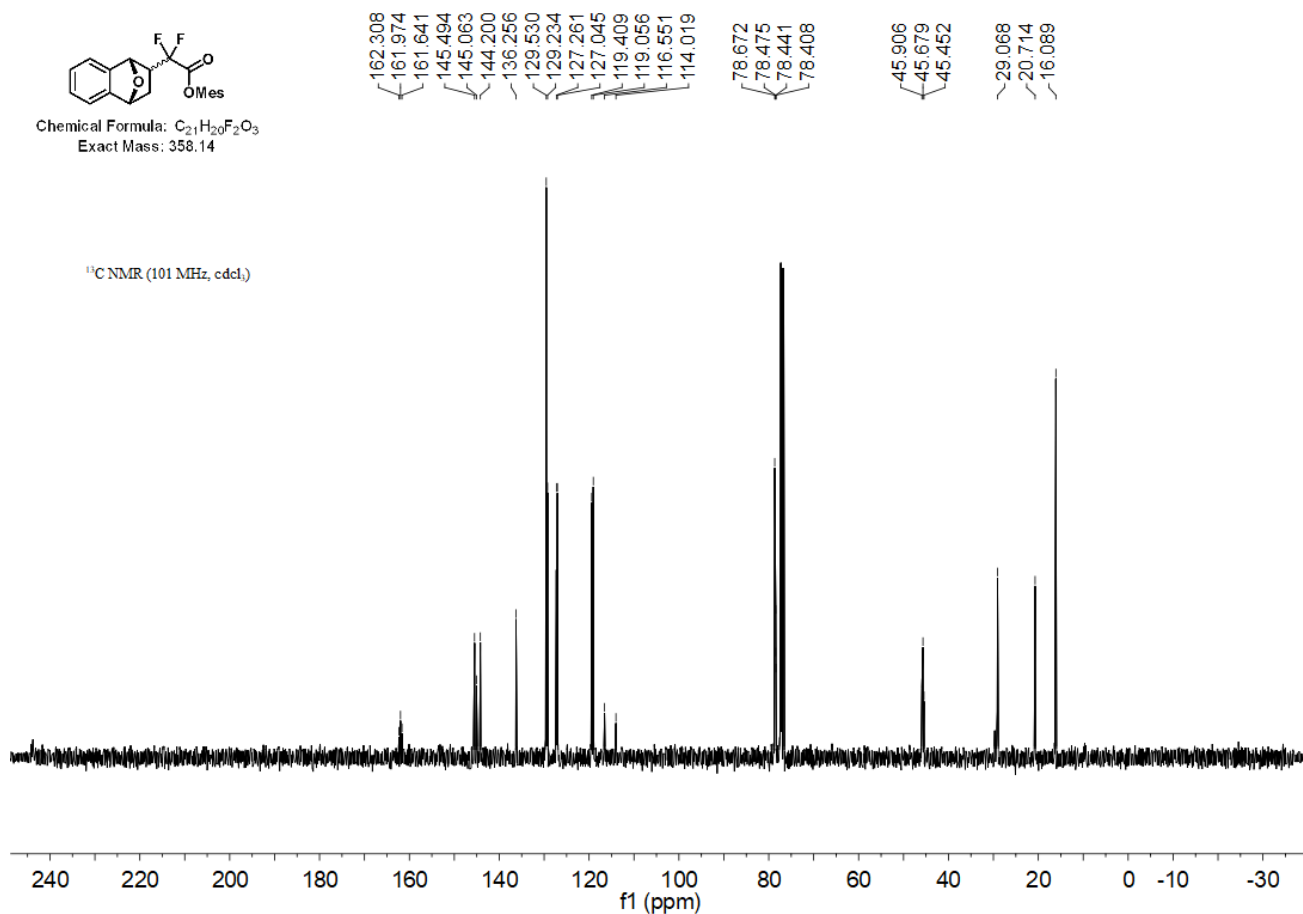

### Dimethyl(phenyl)(3,3,3-trifluoropropyl)silane (9a)

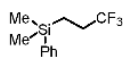

Chemical Formula:  $C_{11}H_{15}F_3Si$   
Exact Mass: 232.0895

$^1H$  NMR (400 MHz,  $cdCl_3$ )

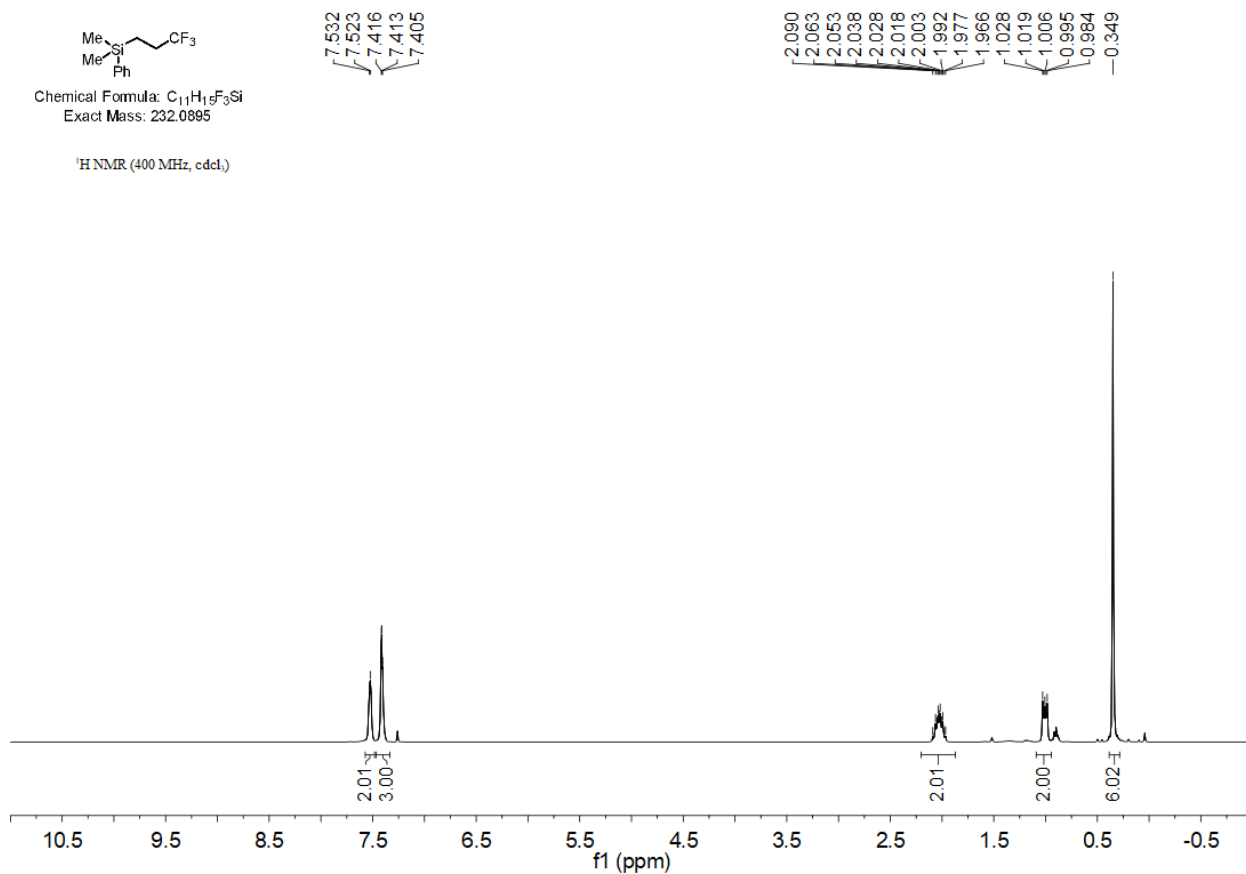

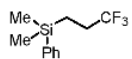

Chemical Formula: C<sub>11</sub>H<sub>15</sub>F<sub>3</sub>Si  
Exact Mass: 232.0895

<sup>19</sup>F NMR (376 MHz, cdcl<sub>3</sub>)

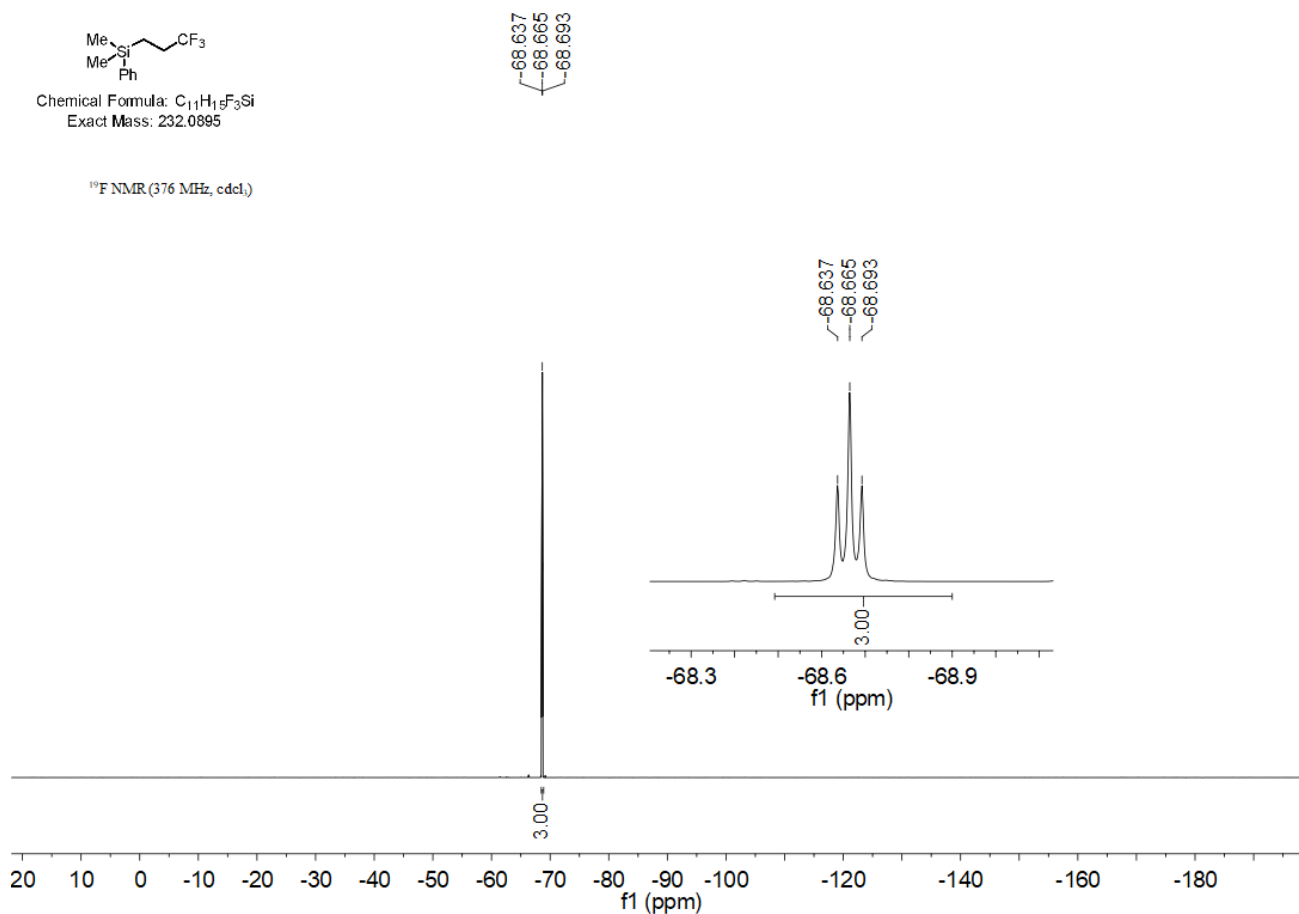

# Dimethyl(phenyl)(3,3,4,4,5,5,6,6,7,7,8,8,8-tridecafluorooctyl)silane (9b)

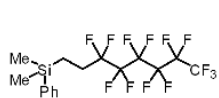

Chemical Formula:  $C_{18}H_{15}F_{13}Si$   
Exact Mass: 482.0735

$^1H$  NMR (400 MHz,  $cdCl_3$ )

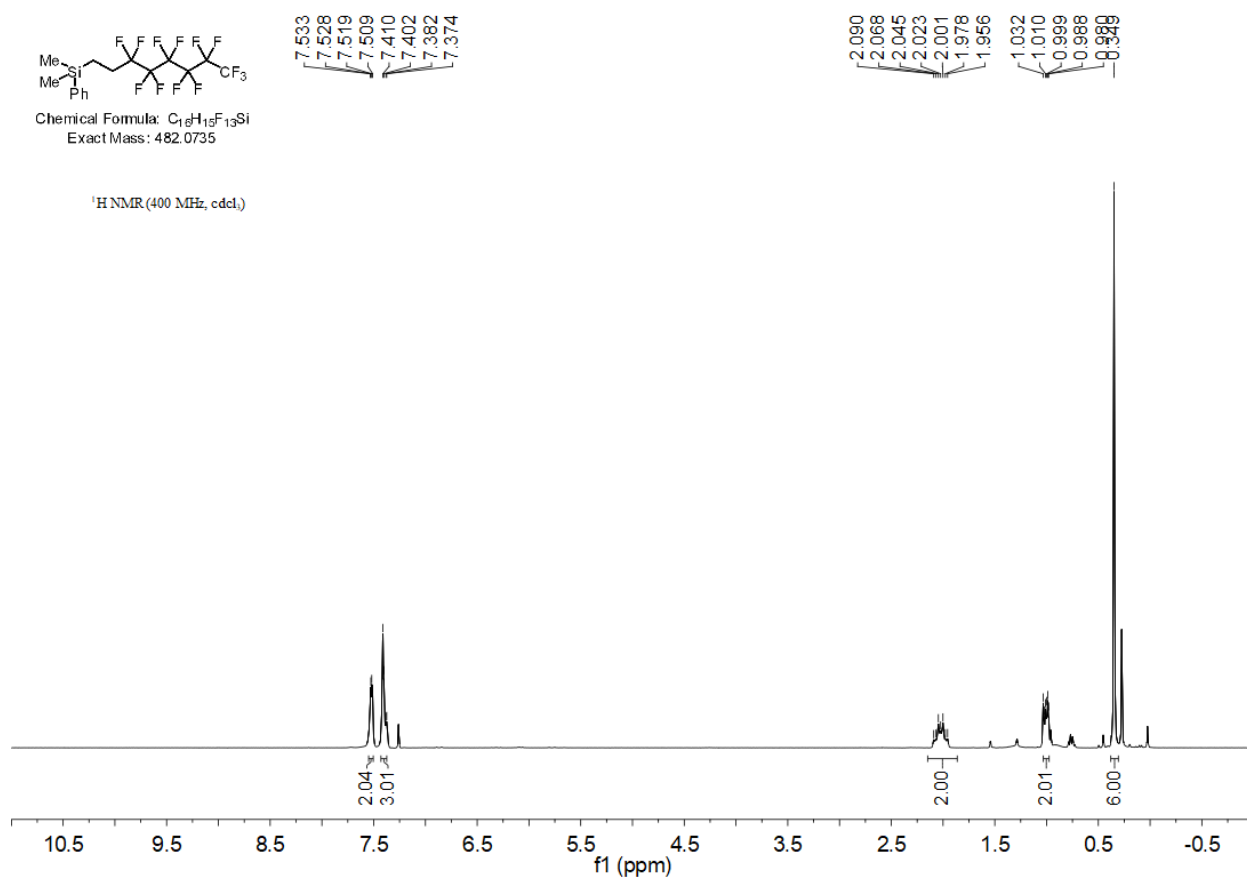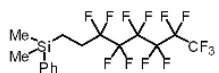

Chemical Formula:  $C_{18}H_{15}F_{13}Si$   
Exact Mass: 482.0735

$^{19}F$  NMR (376 MHz,  $cdCl_3$ )

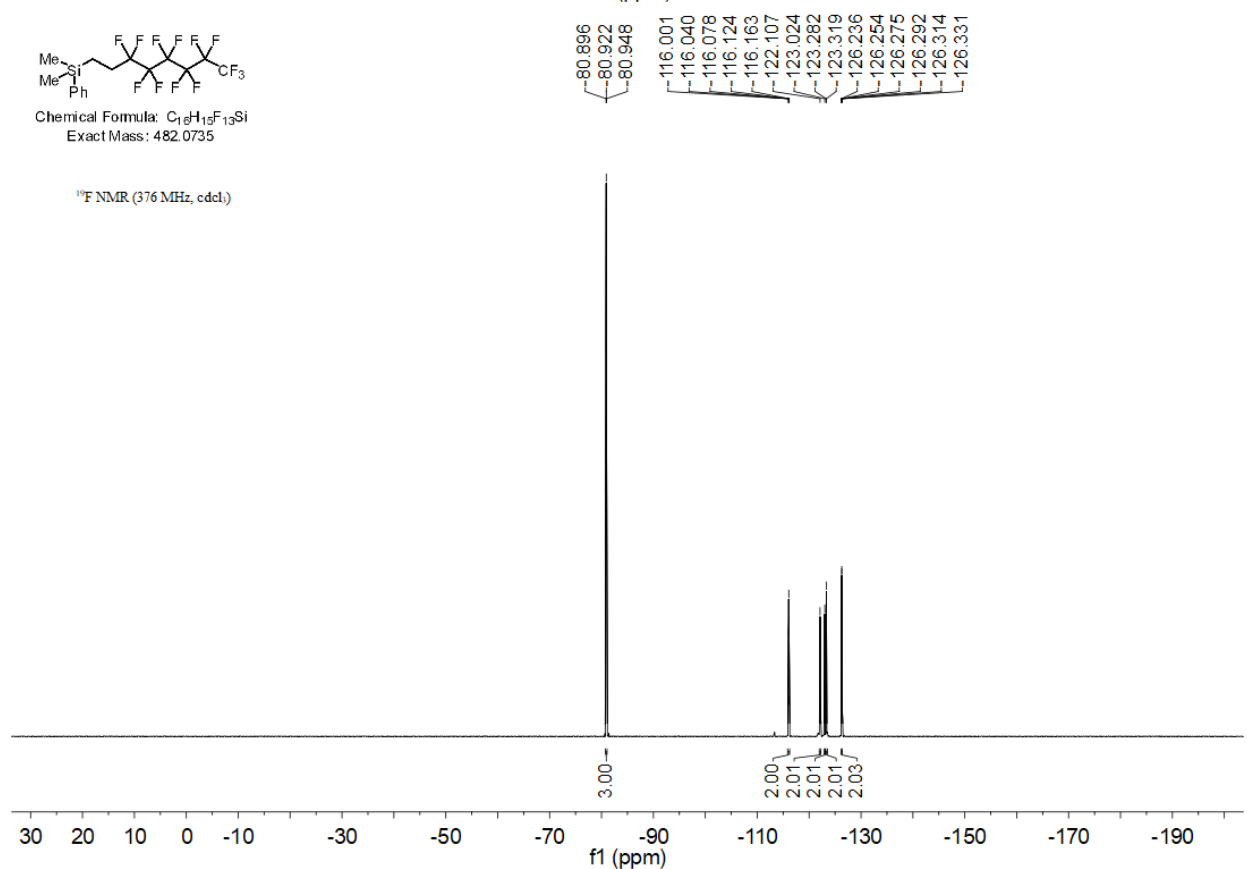

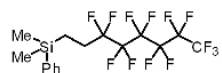

Chemical Formula:  $C_{16}H_{15}F_{13}Si$   
Exact Mass: 482.0735

$^{13}C$  NMR (151 MHz,  $cdCl_3$ )

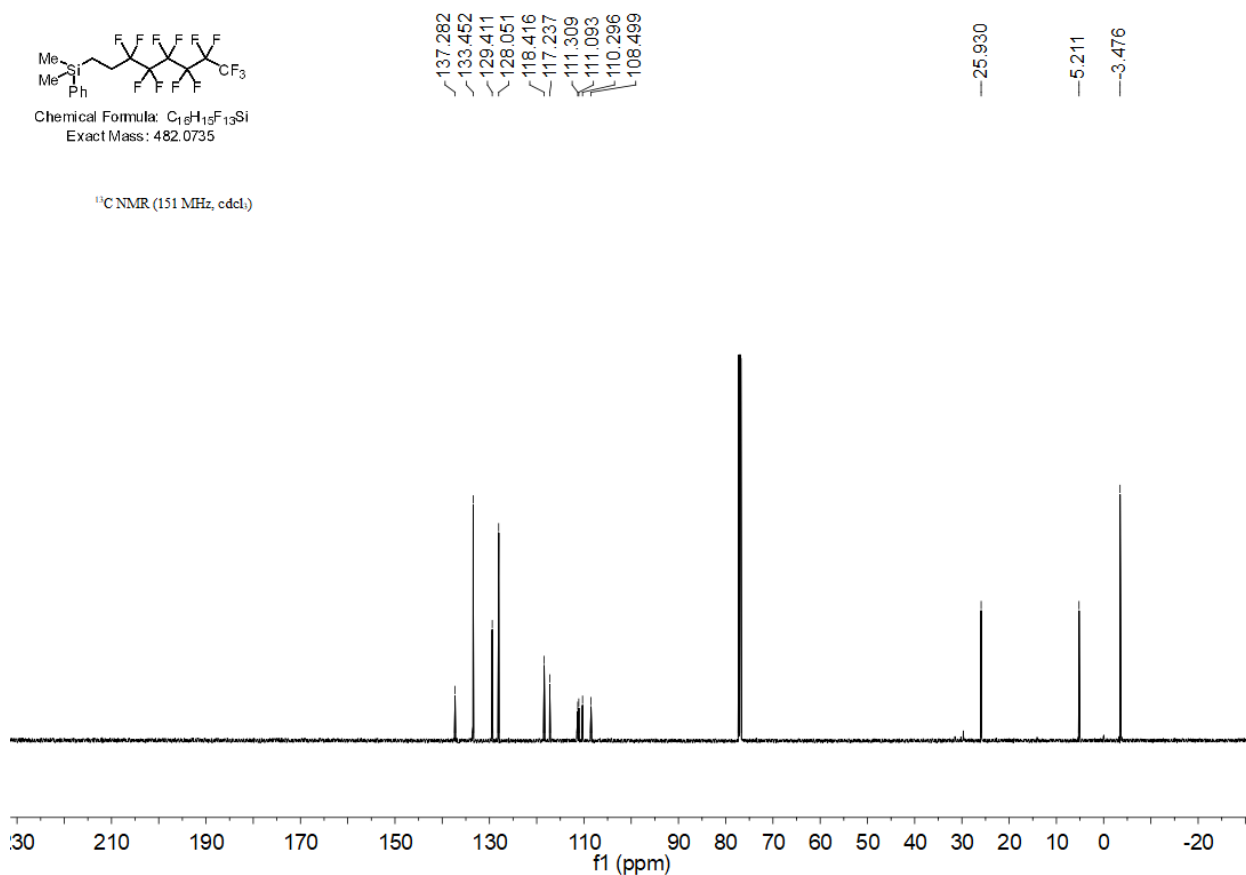

### Ethyl 4-(dimethyl(phenyl)silyl)-2-fluorobutanoate (9c)

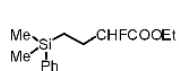

Chemical Formula:  $C_{14}H_{21}FO_2Si$   
Exact Mass: 268.1295

$^1H$  NMR (400 MHz,  $cdCl_3$ )

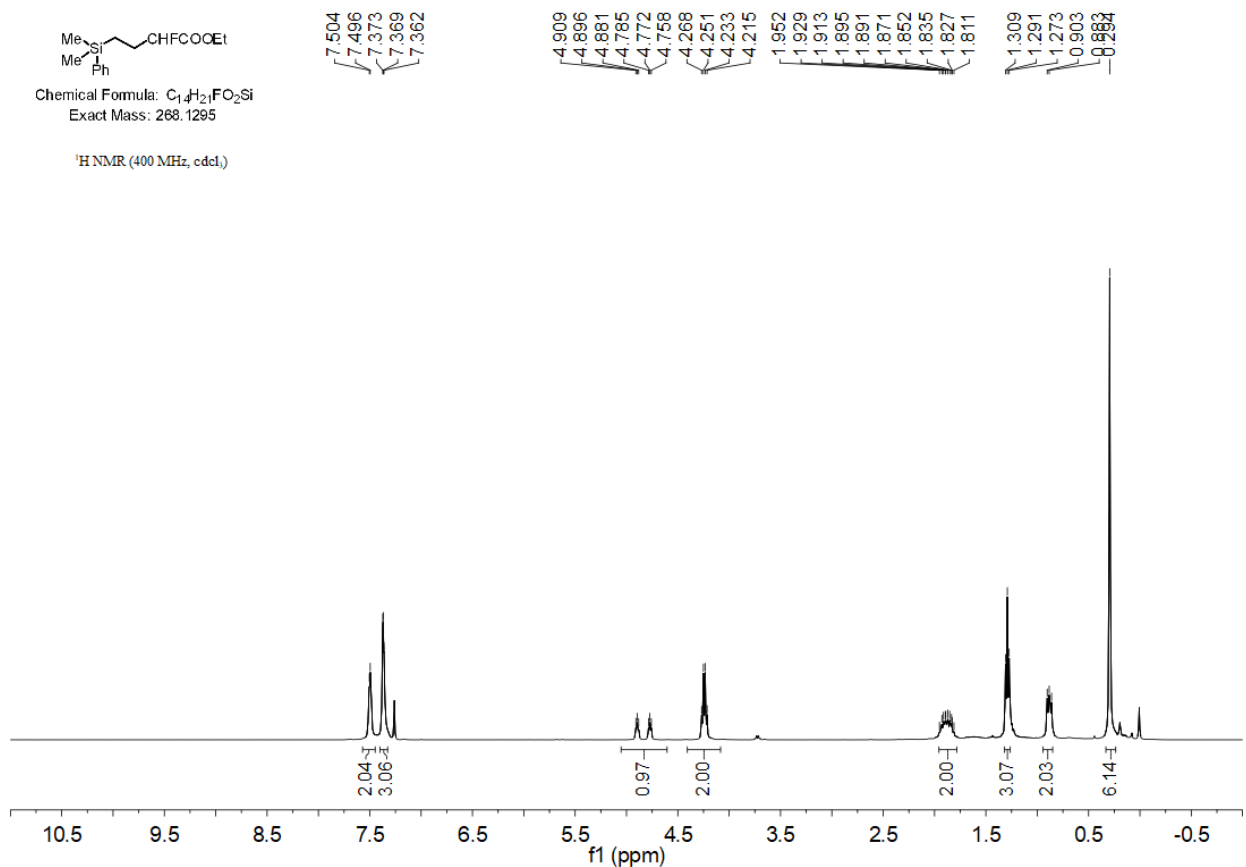

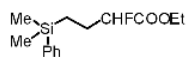

Chemical Formula:  $C_{14}H_{21}FO_2Si$   
Exact Mass: 268.1295

$^{19}F$  NMR (376 MHz,  $cdCl_3$ )

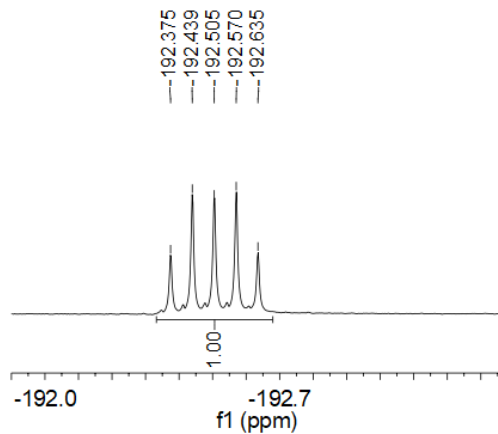

192.375  
192.439  
192.505  
192.570  
192.635

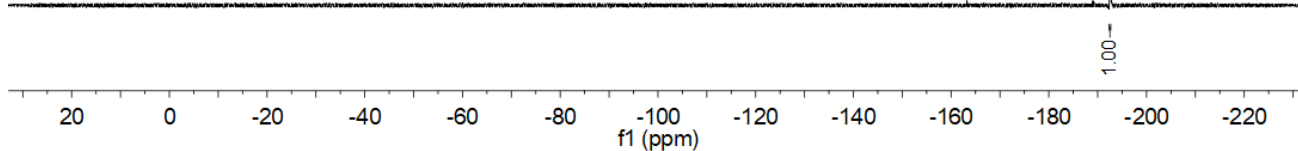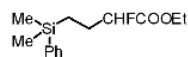

Chemical Formula:  $C_{14}H_{21}FO_2Si$   
Exact Mass: 268.1295

$^{13}C$  NMR (101 MHz,  $cdCl_3$ )

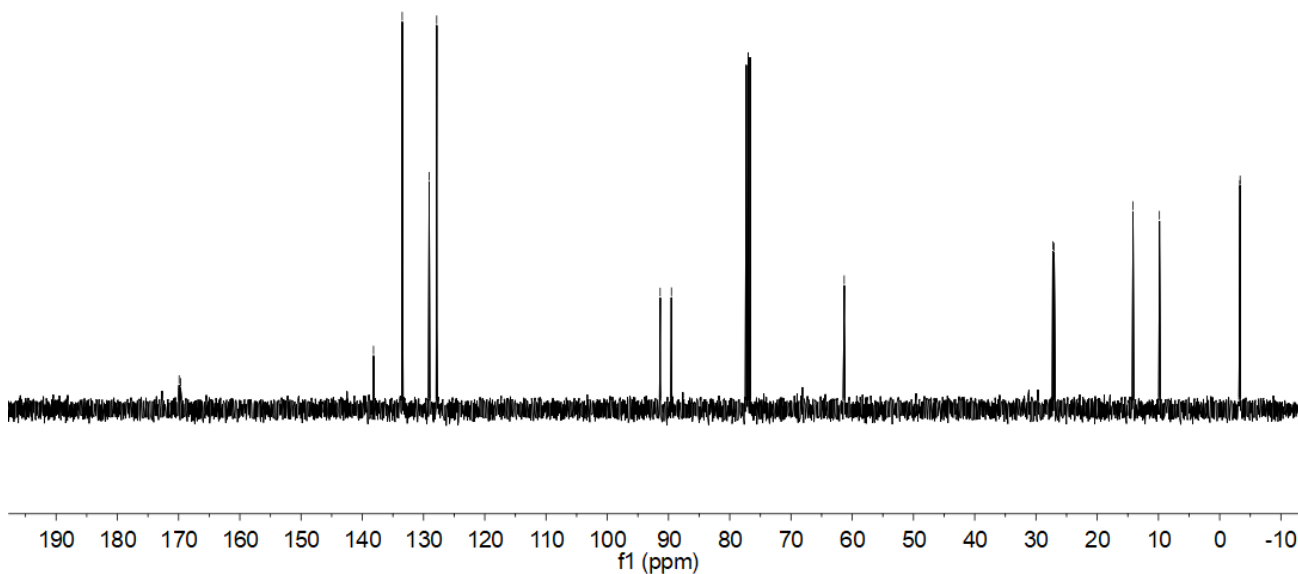

# **Ethyl 1-(2-(dimethyl(phenyl)silyl)ethyl)cyclobutane-1-carboxylate (9d)**

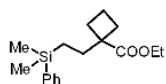

Chemical Formula:  $C_{17}H_{26}O_2Si$   
Exact Mass: 290.1702

$^1H$  NMR (400 MHz,  $cdCl_3$ )

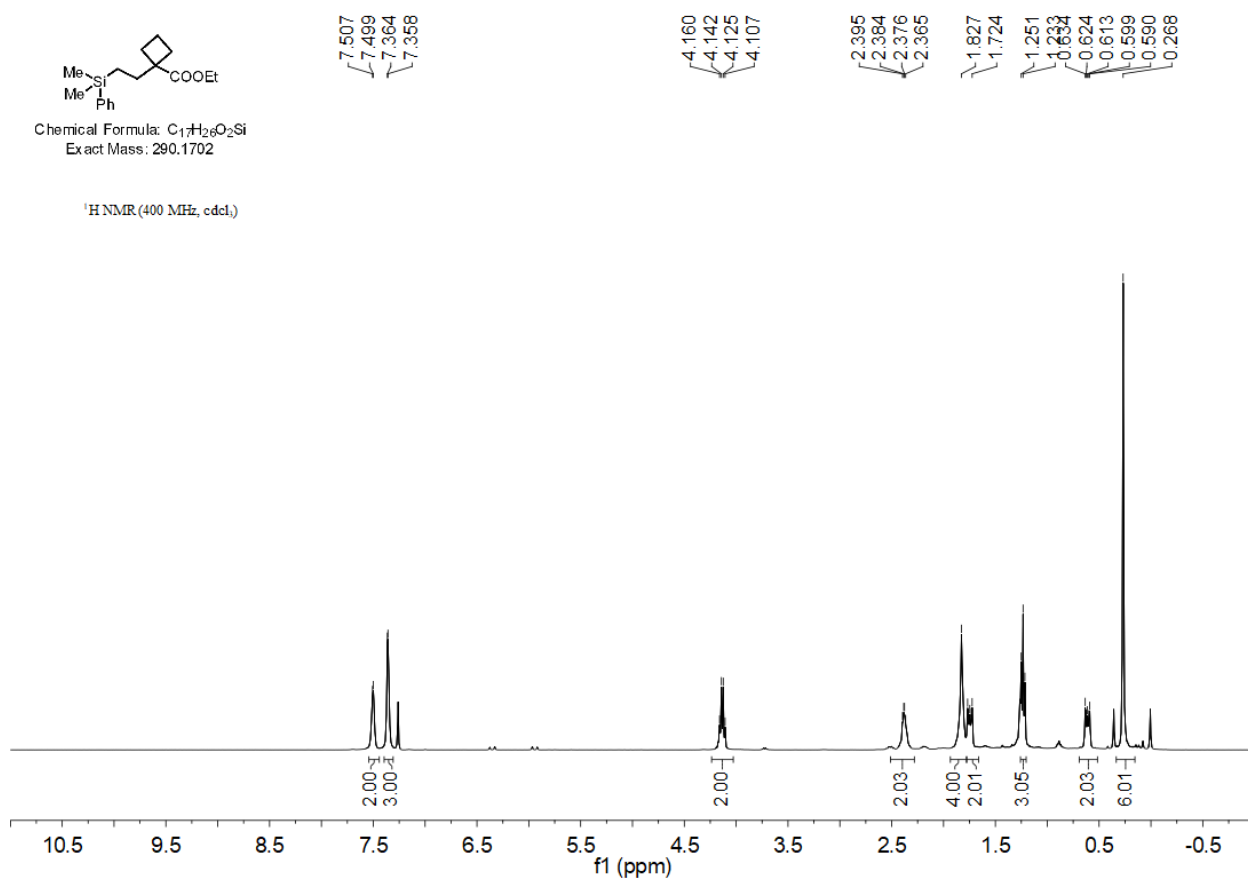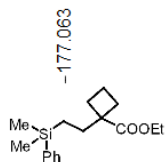

Chemical Formula:  $C_{17}H_{26}O_2Si$   
Exact Mass: 290.1702

$^{13}C$  NMR (101 MHz,  $cdCl_3$ )

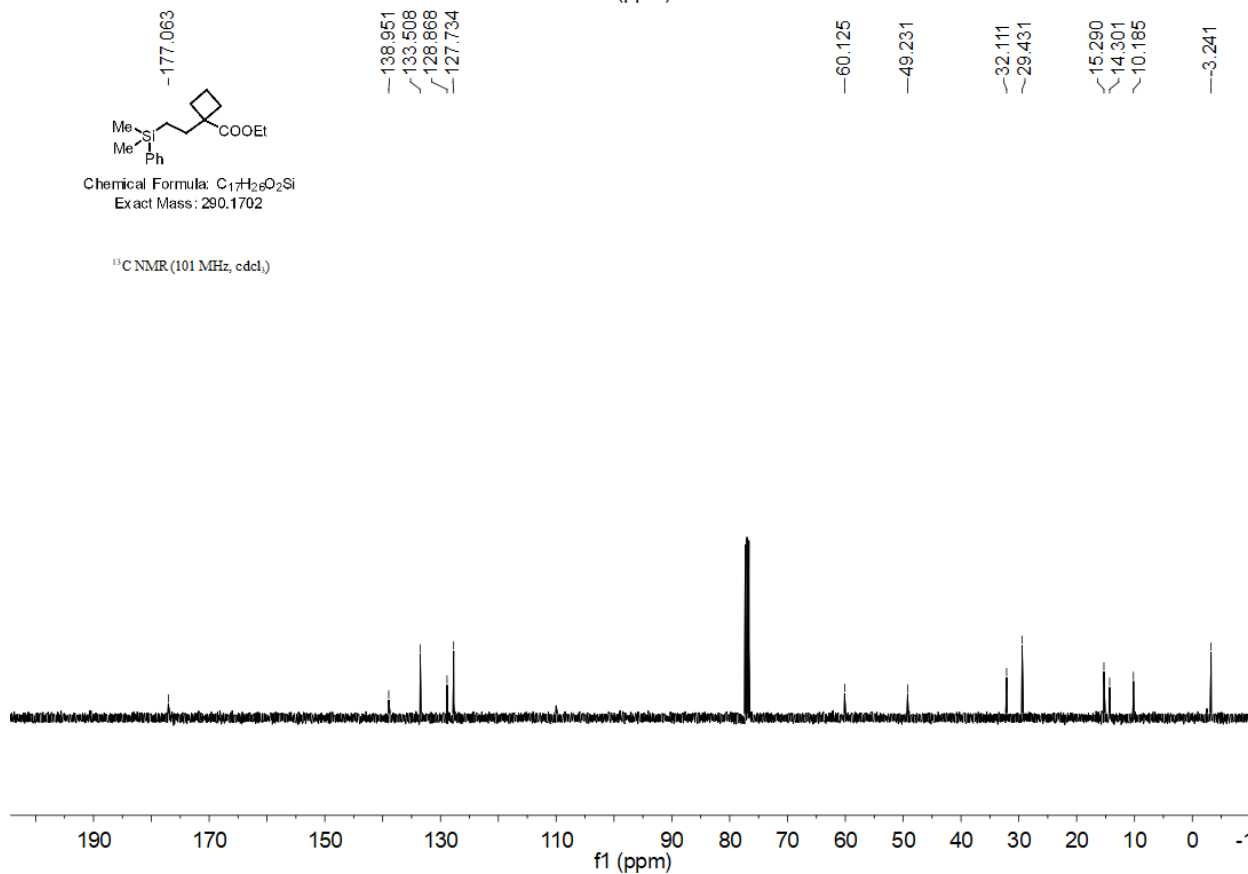



# Diethyl 2-(2-(dimethyl(phenyl)silyl)ethyl)malonate (9e)

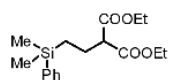

Chemical Formula:  $C_{17}H_{26}O_4Si$   
Exact Mass: 322.1600

$^1H$  NMR (400 MHz,  $cdCl_3$ )

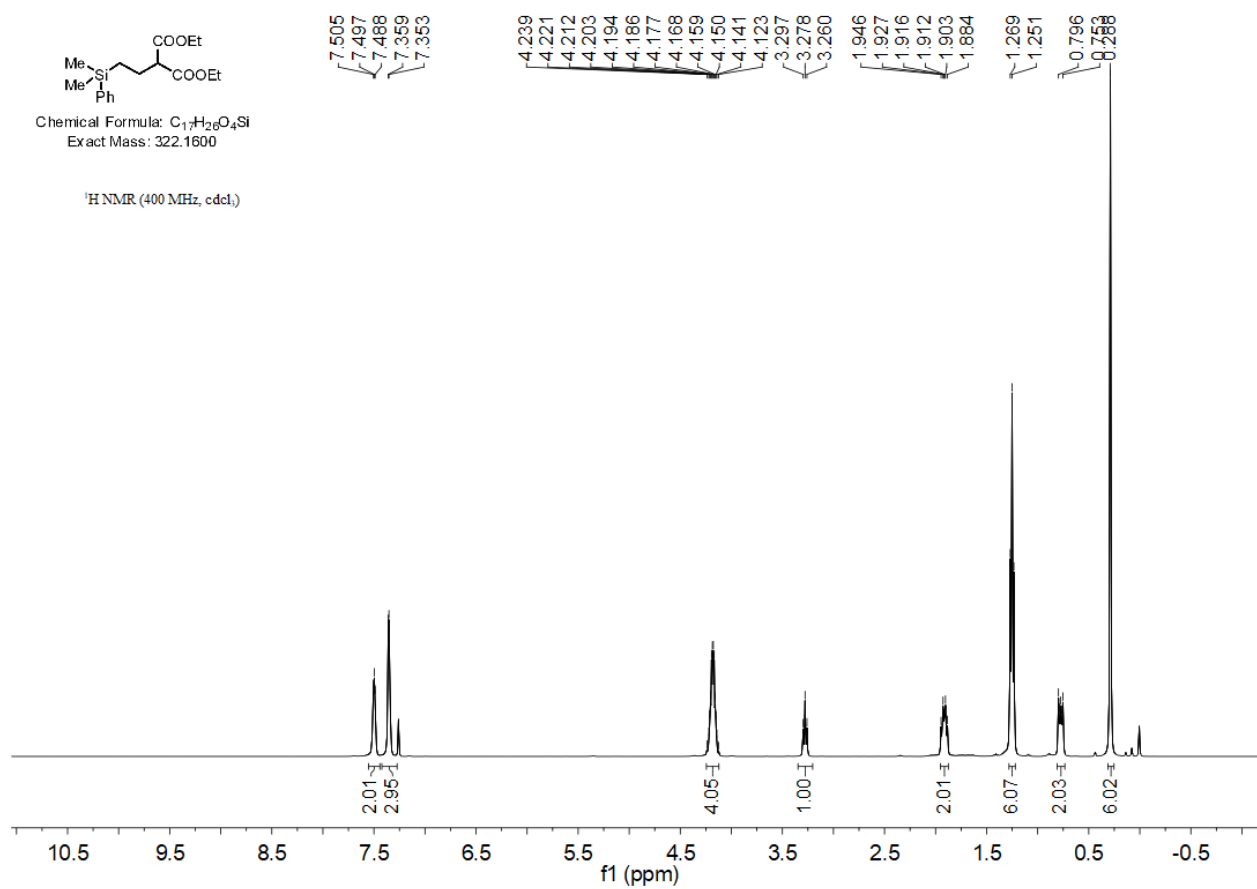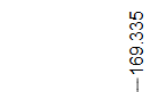

Chemical Formula:  $C_{17}H_{26}O_4Si$   
Exact Mass: 322.1600

$^{13}C$  NMR (101 MHz,  $cdCl_3$ )

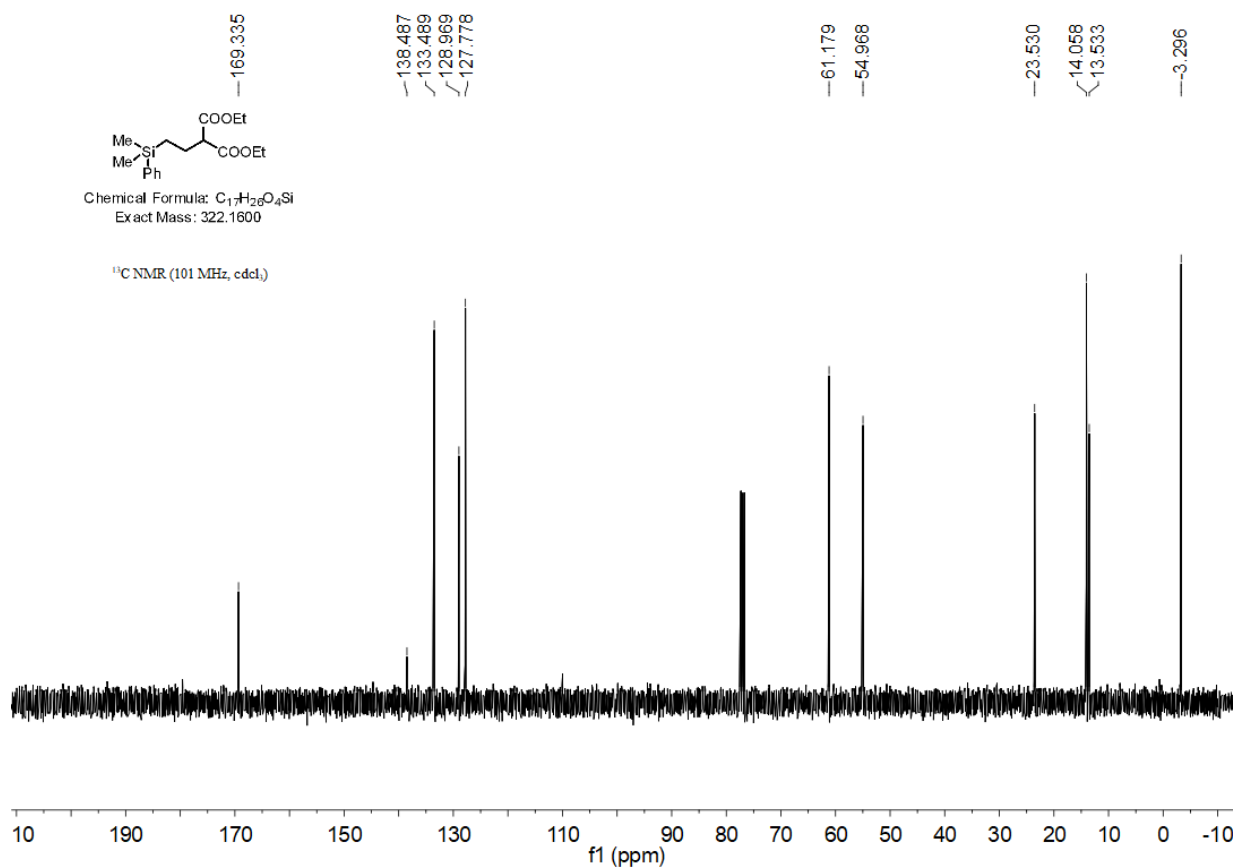

***tert*-Butyl 4-(2-(dimethyl(phenyl)silyl)ethyl)piperidine-1-carboxylate (9f)**

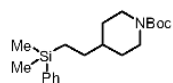

Chemical Formula: C<sub>20</sub>H<sub>33</sub>NO<sub>2</sub>Si  
Exact Mass: 347.2281

<sup>1</sup>H NMR (400 MHz, cdcl<sub>3</sub>)

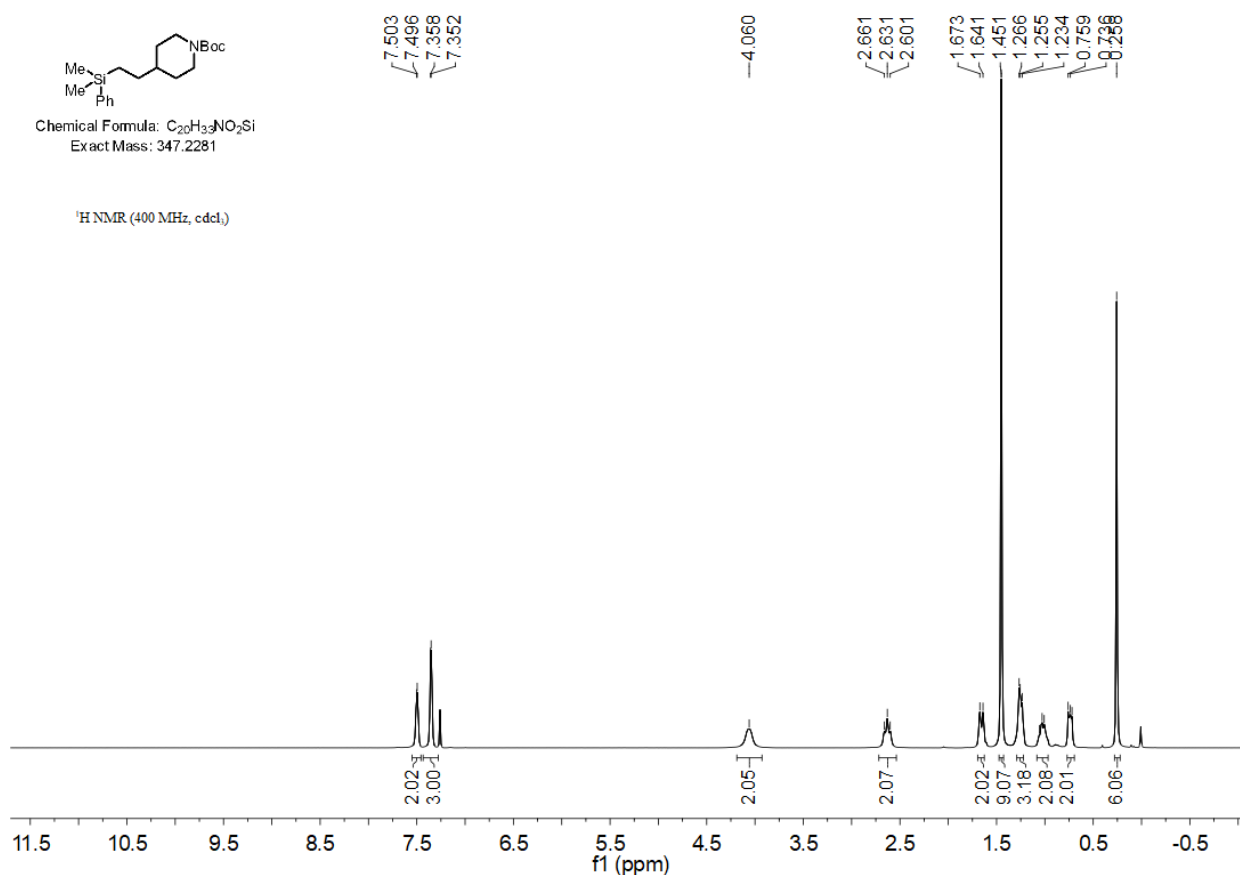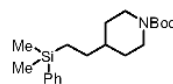

Chemical Formula: C<sub>20</sub>H<sub>33</sub>NO<sub>2</sub>Si  
Exact Mass: 347.2281

<sup>13</sup>C NMR (101 MHz, cdcl<sub>3</sub>)

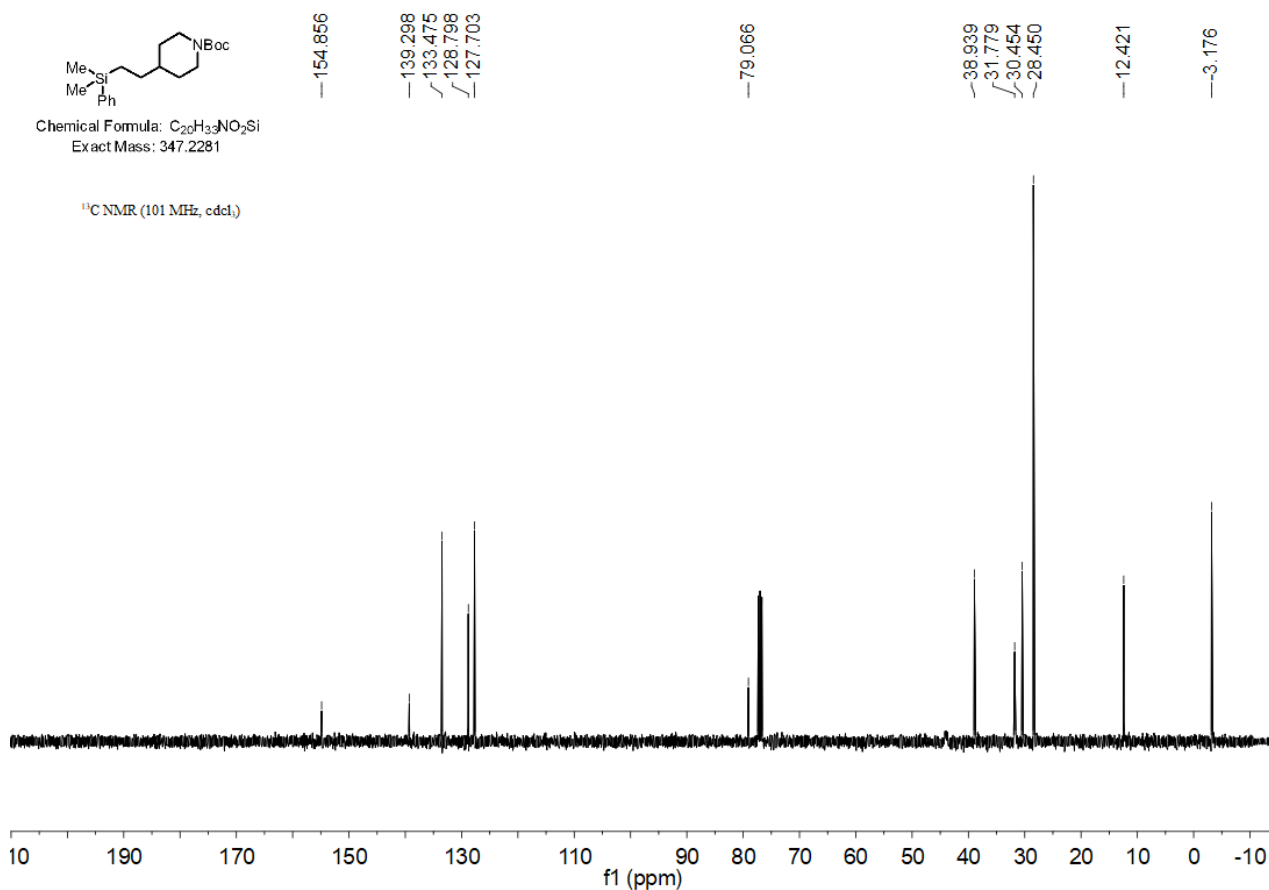

# Mesityl 2-(3-benzyl-2,4-dioxo-3-azabicyclo[3.2.0]heptan-6-yl)-2,2-difluoroacetate (10a)

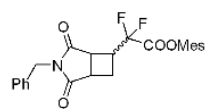

Chemical Formula:  $C_{24}H_{23}F_2NO_4$   
Exact Mass: 427.16

$^1H$  NMR (400 MHz,  $cdCl_3$ )

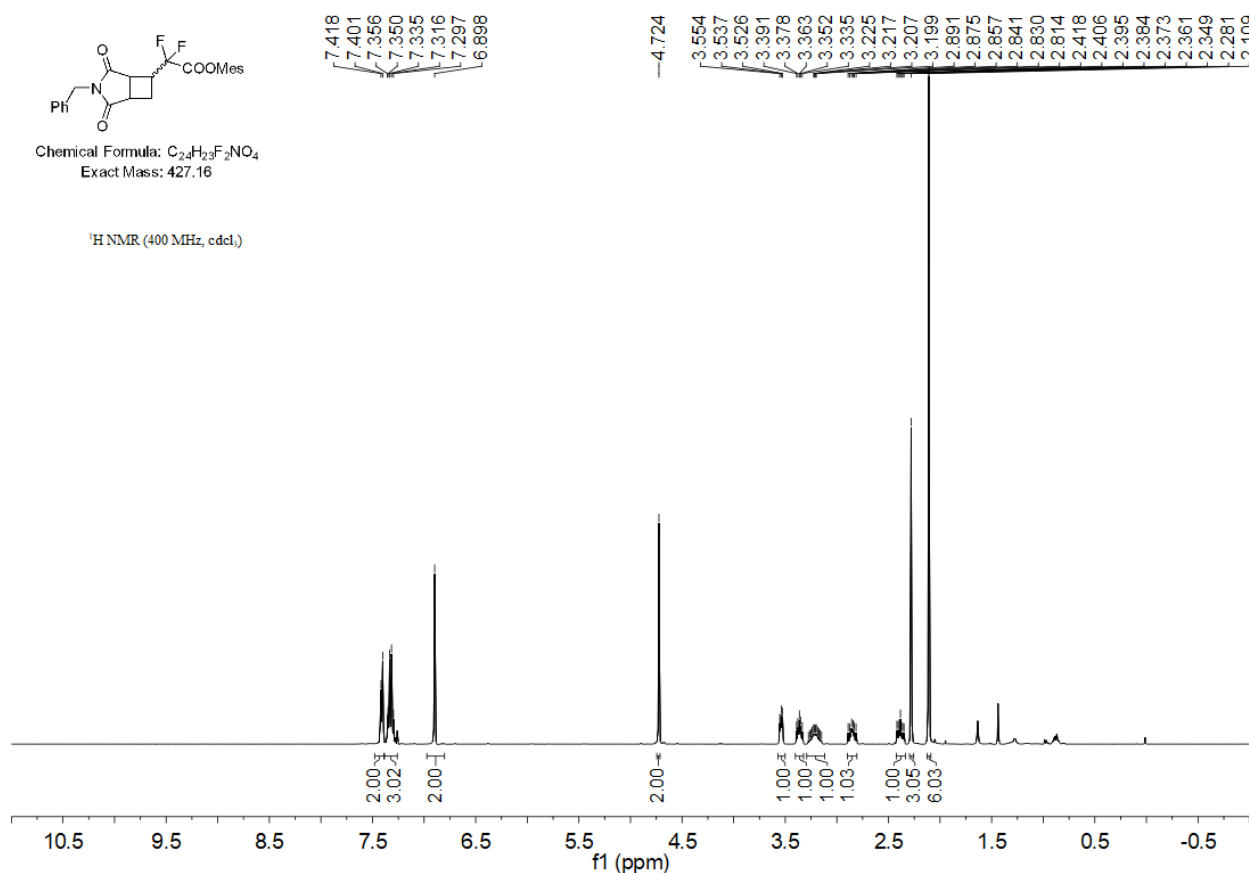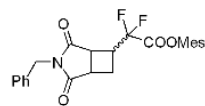

Chemical Formula:  $C_{24}H_{23}F_2NO_4$   
Exact Mass: 427.16

$^{19}F$  NMR (376 MHz,  $cdCl_3$ )

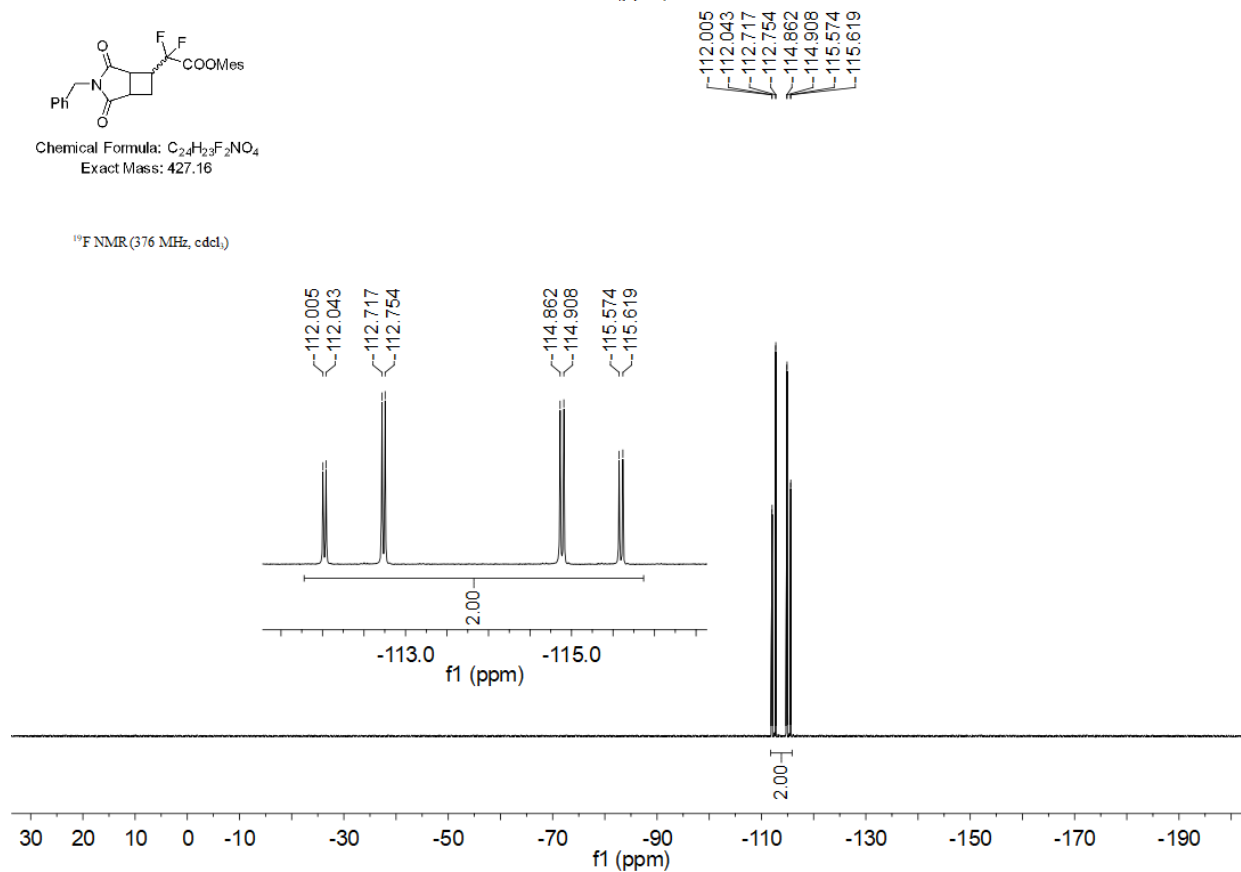

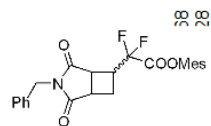

Chemical Formula:  $C_{24}H_{23}F_2NO_4$   
Exact Mass: 427.16

$^{13}C$  NMR (126 MHz,  $CDCl_3$ )

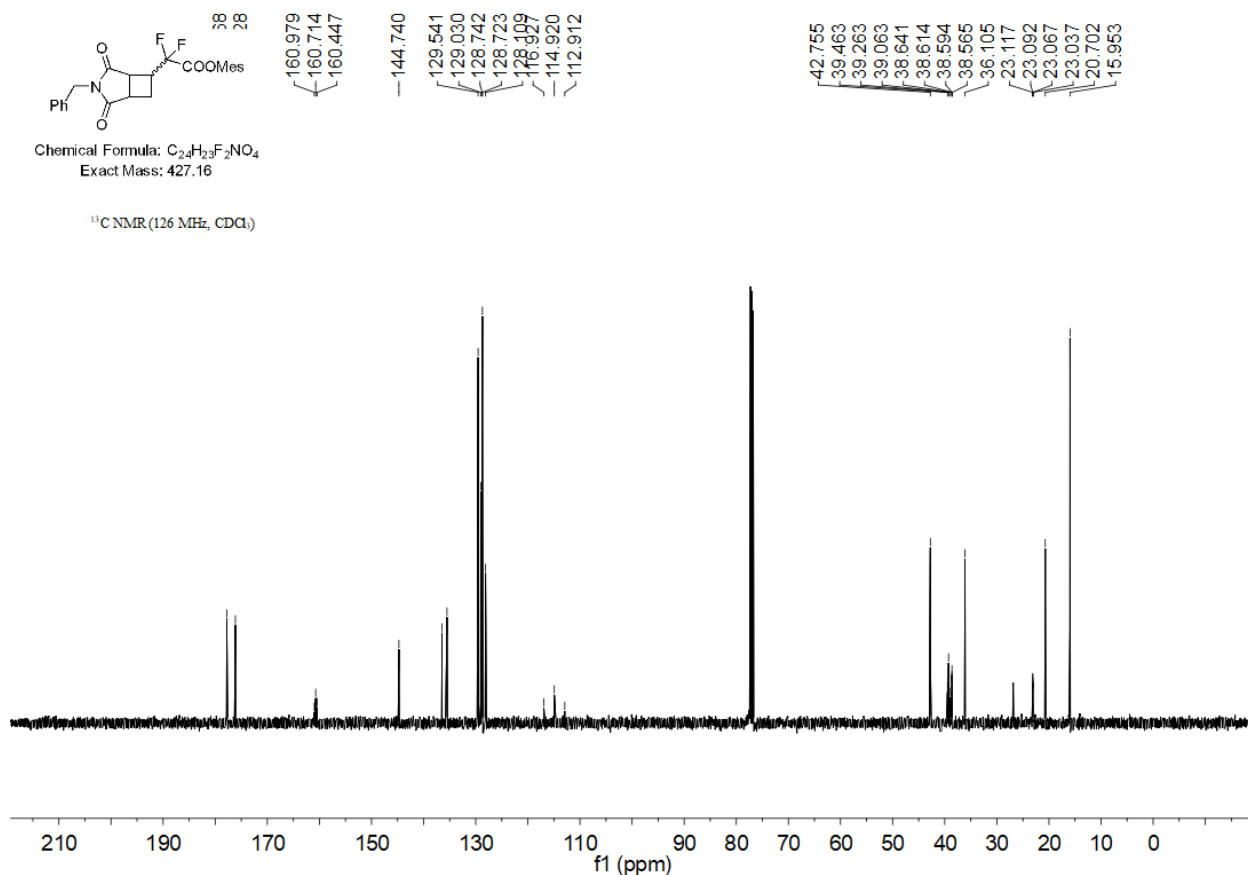

### Mesityl 5-benzamido-2,2-difluoropentanoate (10b)

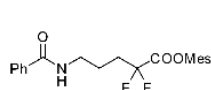

Chemical Formula:  $C_{21}H_{23}F_2NO_3$   
Exact Mass: 375.16

$^1H$  NMR (400 MHz,  $cdcl_3$ )

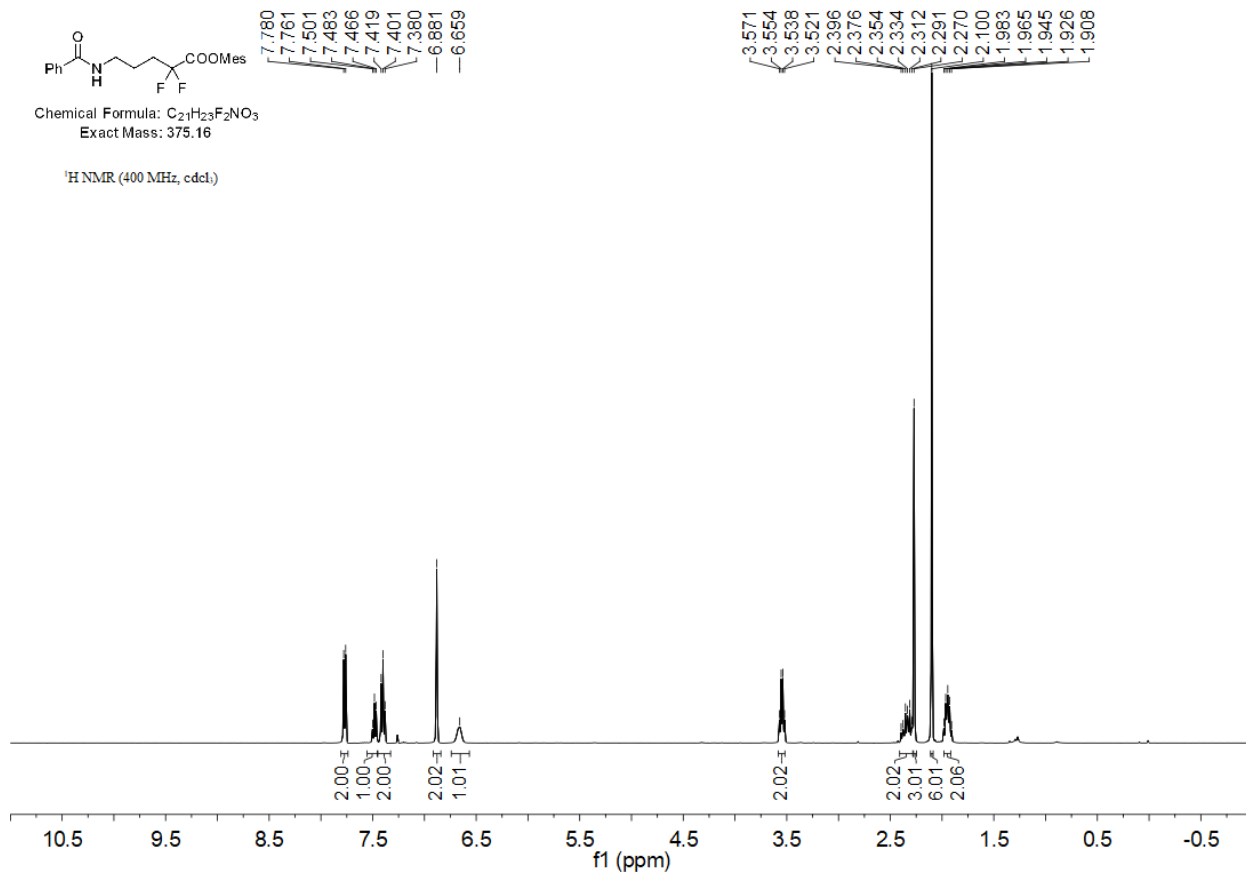

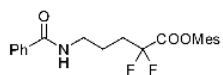

Chemical Formula: C<sub>21</sub>H<sub>23</sub>F<sub>2</sub>NO<sub>3</sub>  
Exact Mass: 375.16

<sup>19</sup>F NMR (376 MHz, cdcl<sub>3</sub>)

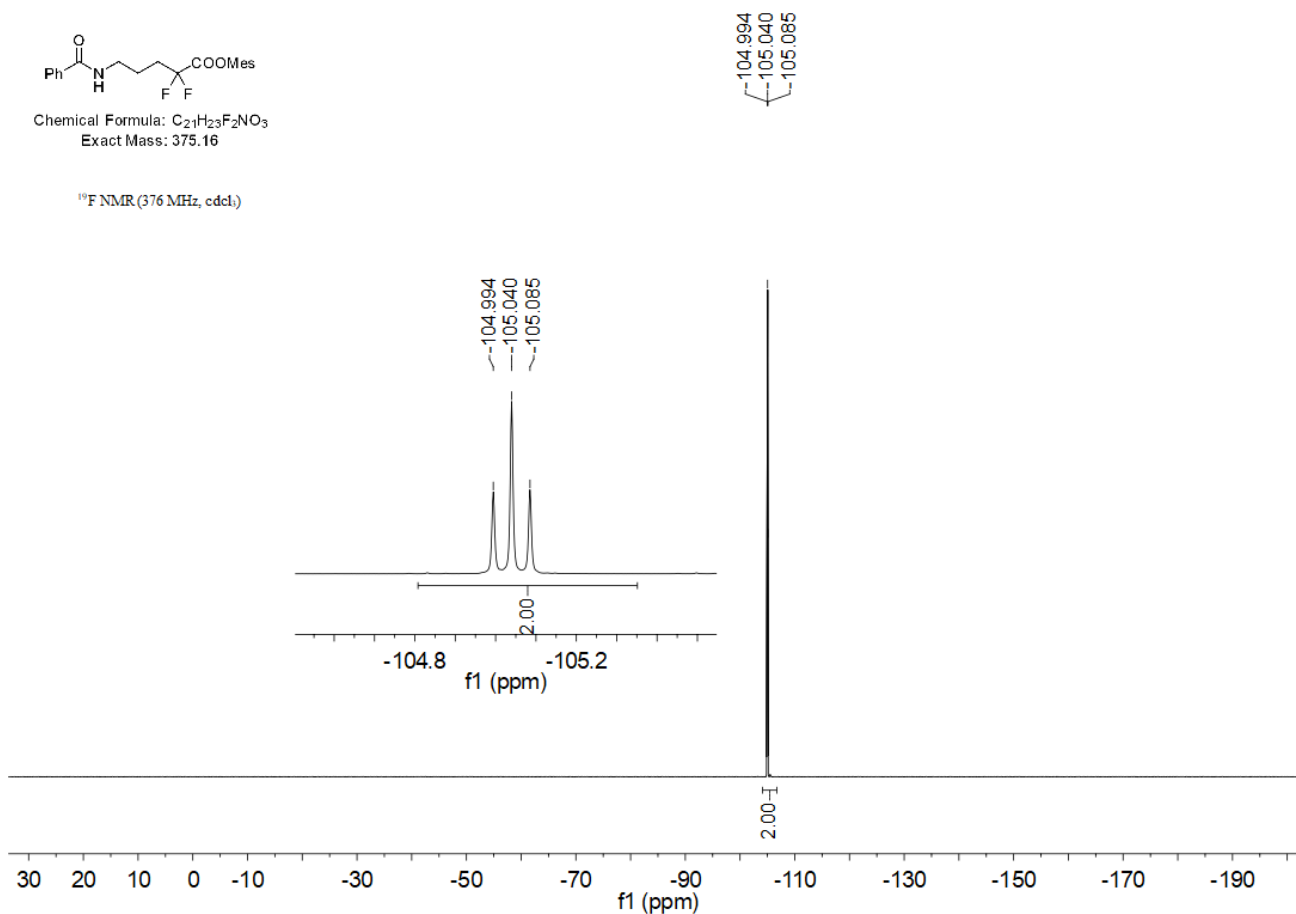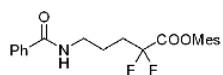

Chemical Formula: C<sub>21</sub>H<sub>23</sub>F<sub>2</sub>NO<sub>3</sub>  
Exact Mass: 375.16

<sup>13</sup>C NMR (126 MHz, CDCl<sub>3</sub>)

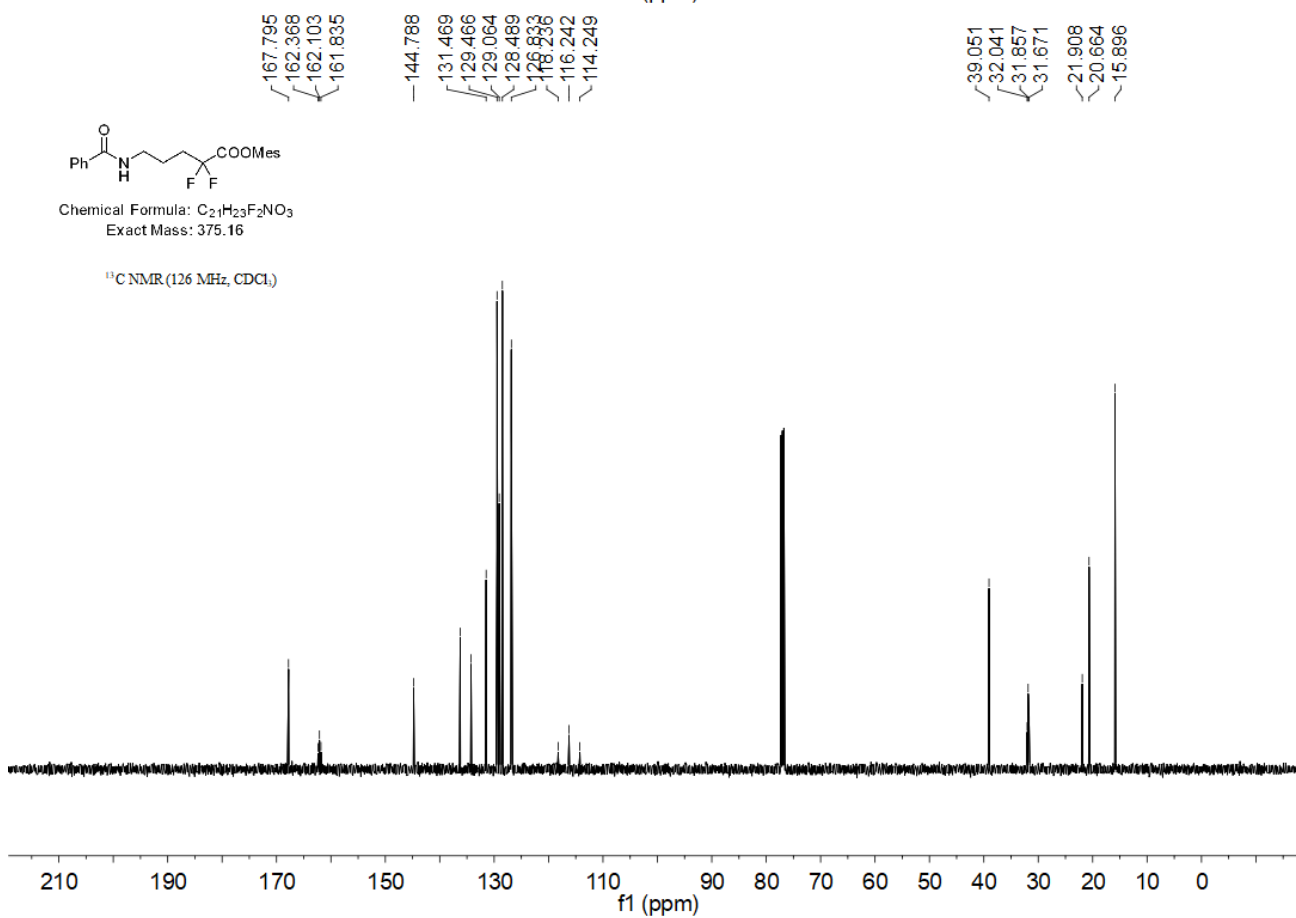

## 2,2-Difluorooctane-1,8-diyl dibenzoate (10c)

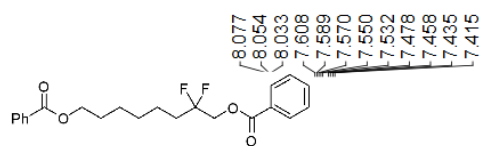

Chemical Formula:  $C_{22}H_{24}F_2O_4$   
Exact Mass: 390.16

$^1H$  NMR (400 MHz,  $cdcl_3$ )

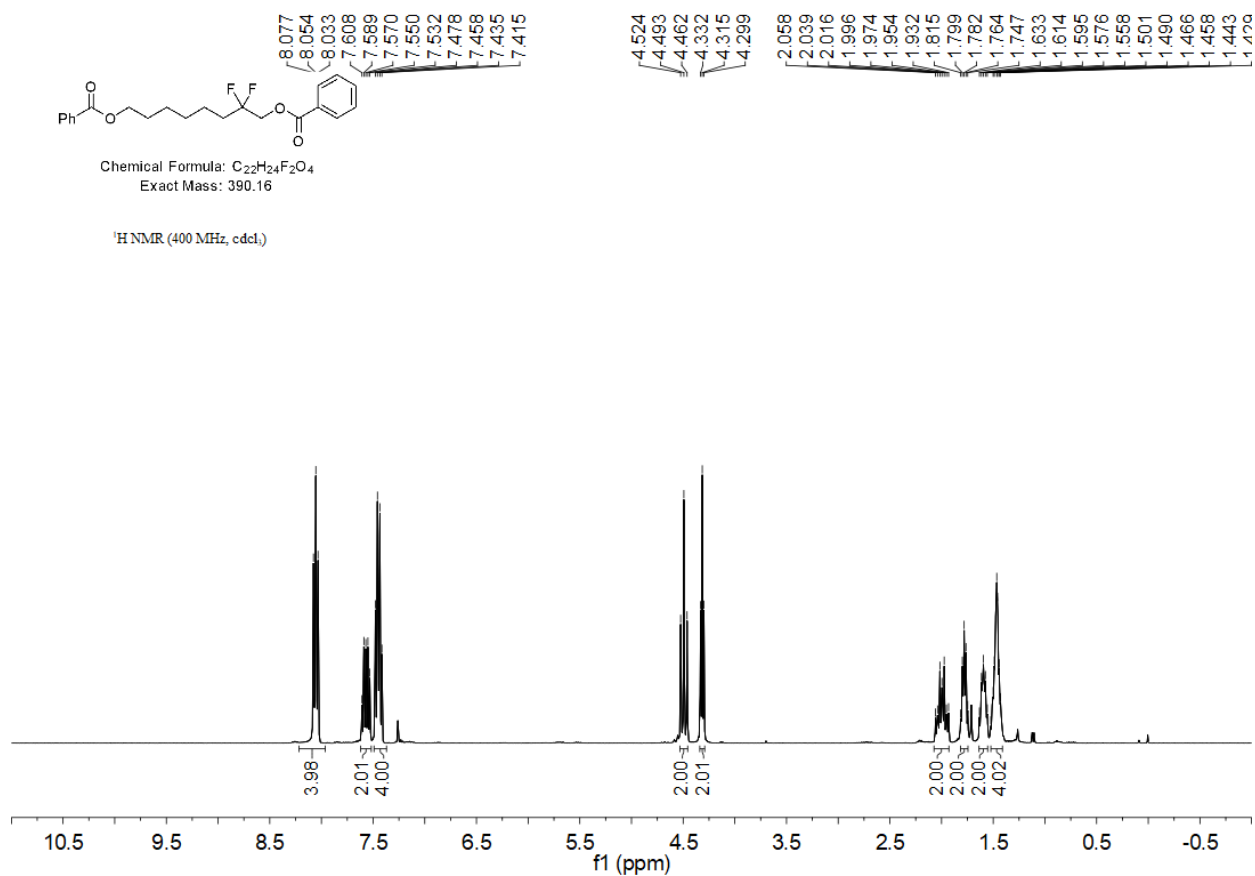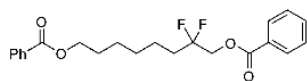

Chemical Formula:  $C_{22}H_{24}F_2O_4$   
Exact Mass: 390.16

$^{19}F$  NMR (376 MHz,  $cdcl_3$ )

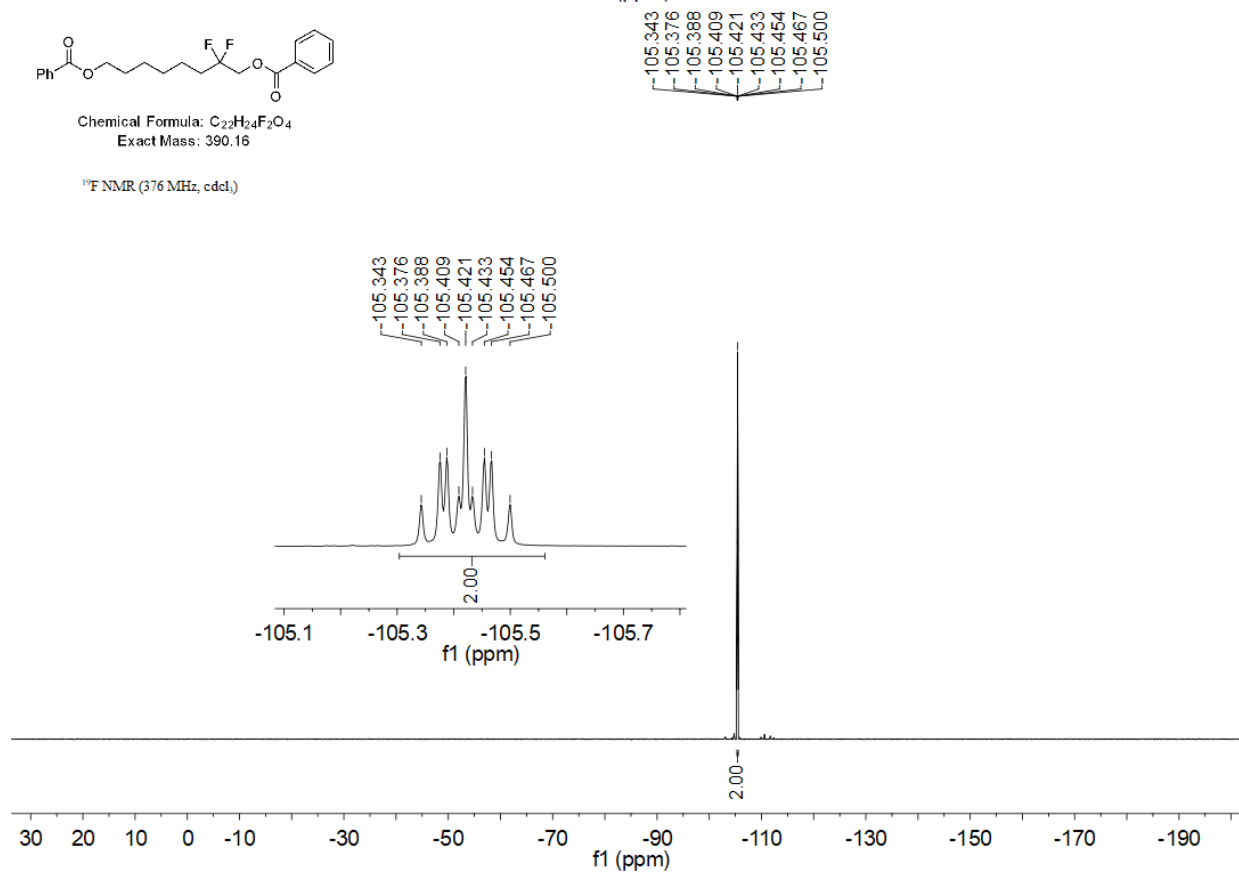

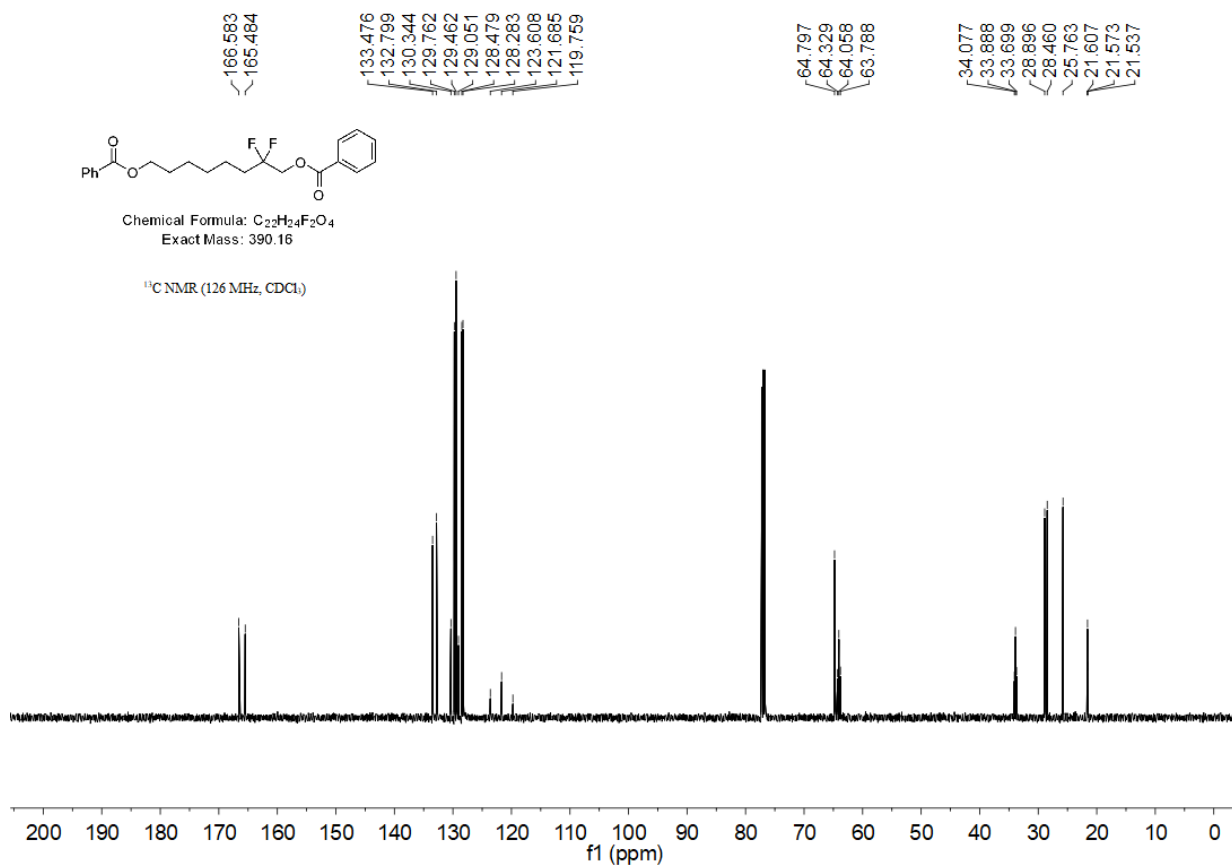

**6,6-Difluoro-9-(((8*R*,9*S*,13*S*,14*S*)-13-methyl-17-oxo-7,8,9,11,12,13,14,15,16,17-decahydro-6*H*-cyclopenta[*a*]phenanthren-3-yl)oxy)nonanenitrile (10d)**

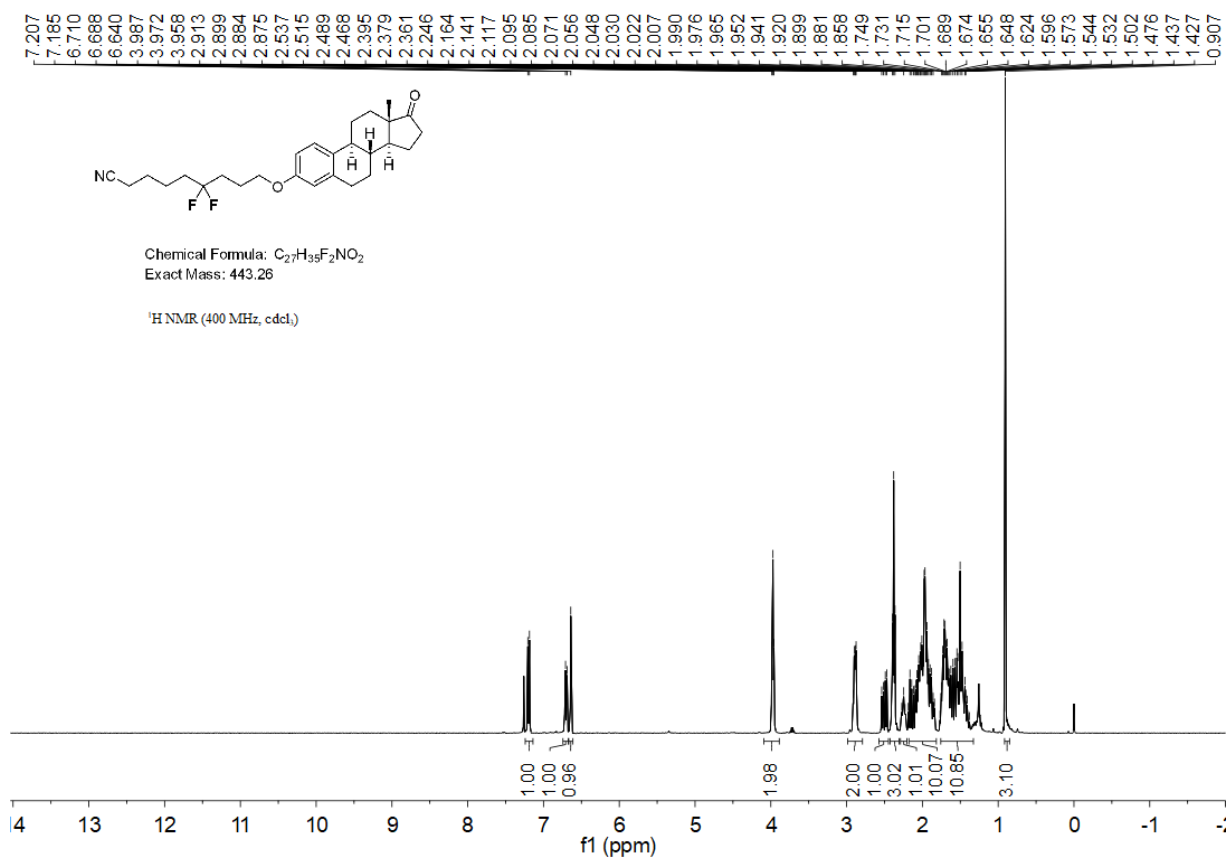

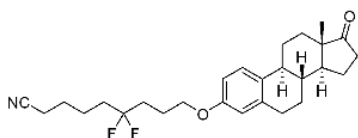

Chemical Formula: C<sub>27</sub>H<sub>35</sub>F<sub>2</sub>NO<sub>2</sub>  
Exact Mass: 443.26

<sup>19</sup>F NMR (376 MHz, cdcl<sub>3</sub>)

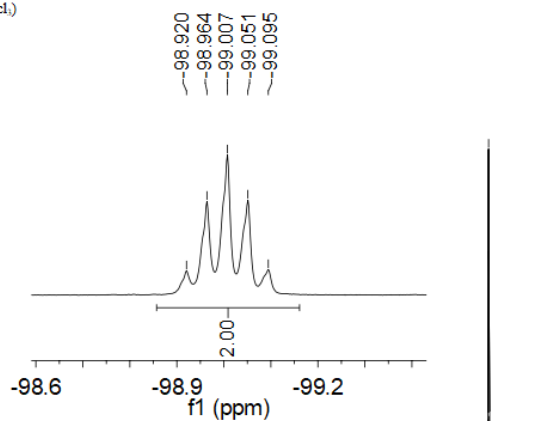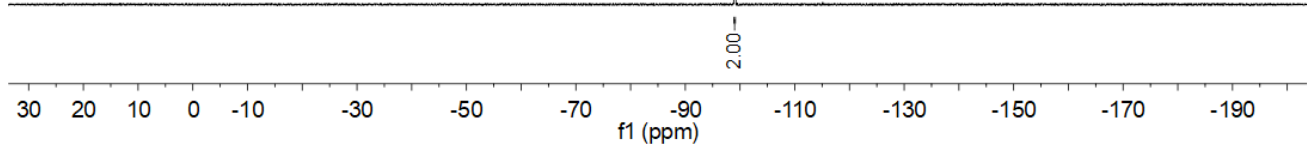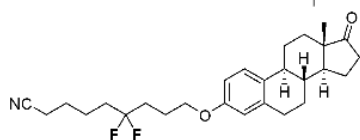

Chemical Formula: C<sub>27</sub>H<sub>35</sub>F<sub>2</sub>NO<sub>2</sub>  
Exact Mass: 443.26

<sup>13</sup>C NMR (126 MHz, CDCl<sub>3</sub>)

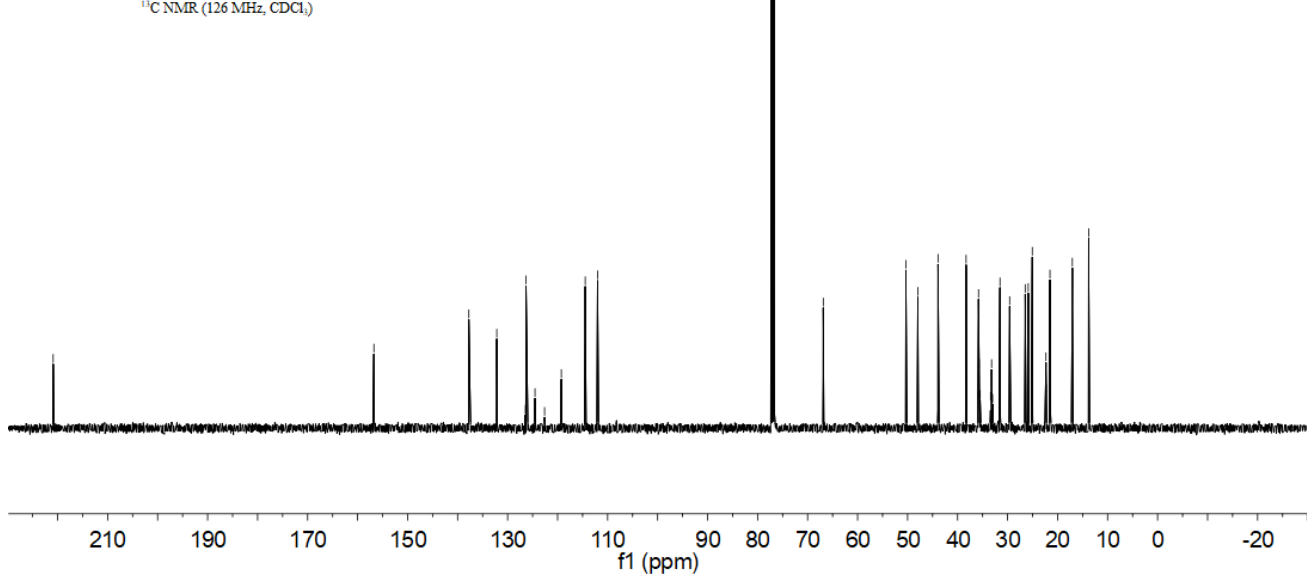



**9-Cyano-5,5-difluorononyl (2*S*,5*R*)-3,3-dimethyl-7-oxo-4-thia-1-azabicyclo[3.2.0]heptane-2-carboxylate 4,4-dioxide (10e)**

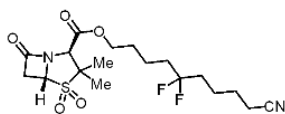

Chemical Formula: C<sub>18</sub>H<sub>26</sub>F<sub>2</sub>N<sub>2</sub>O<sub>5</sub>S  
Exact Mass: 420.15

<sup>1</sup>H NMR (500 MHz, CDCl<sub>3</sub>)

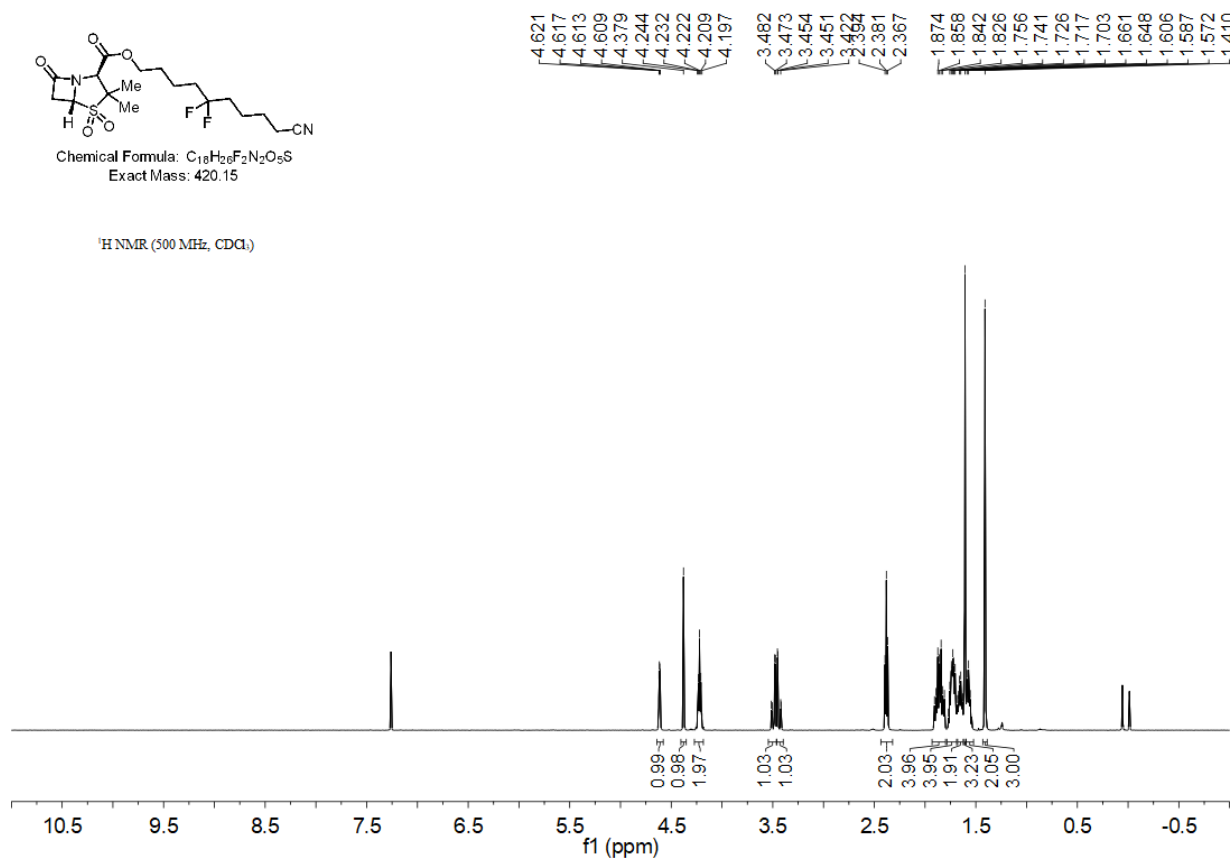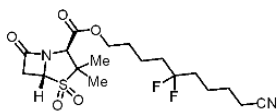

Chemical Formula: C<sub>18</sub>H<sub>26</sub>F<sub>2</sub>N<sub>2</sub>O<sub>5</sub>S  
Exact Mass: 420.15

<sup>19</sup>F NMR (376 MHz, cdcl<sub>3</sub>)

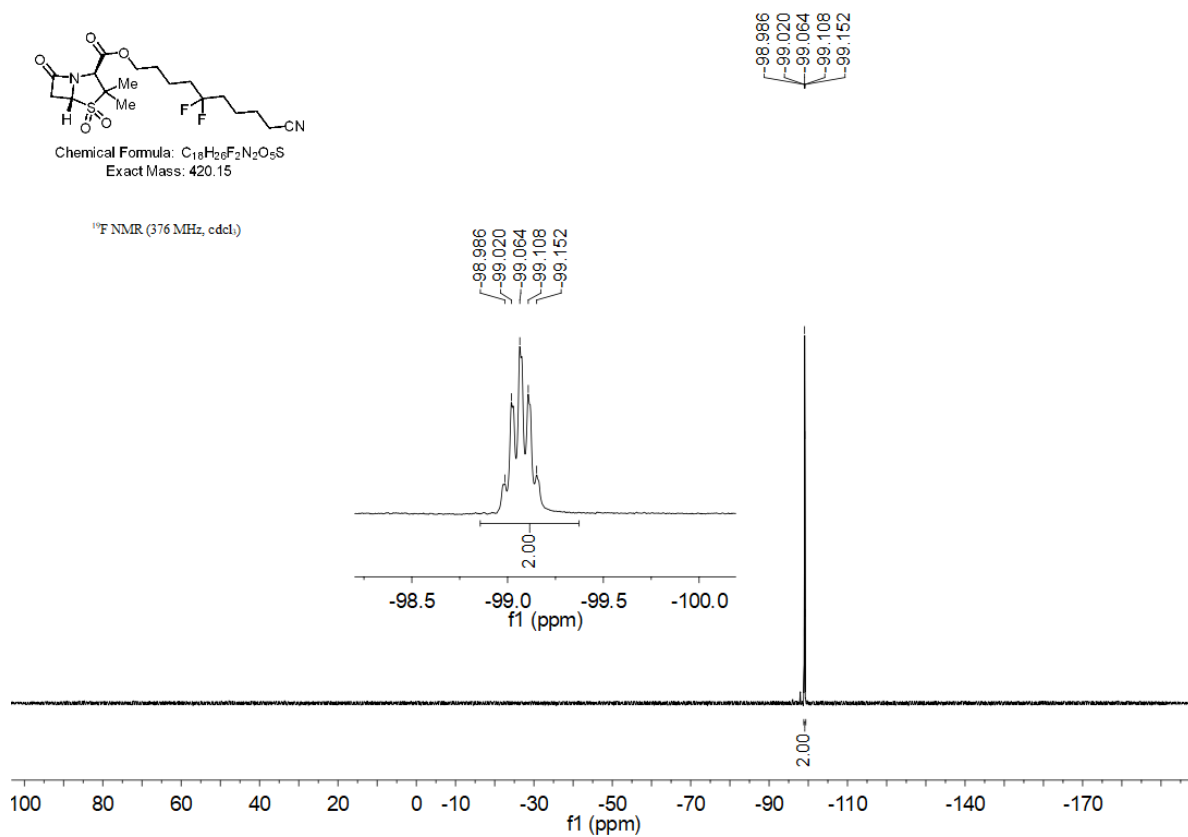

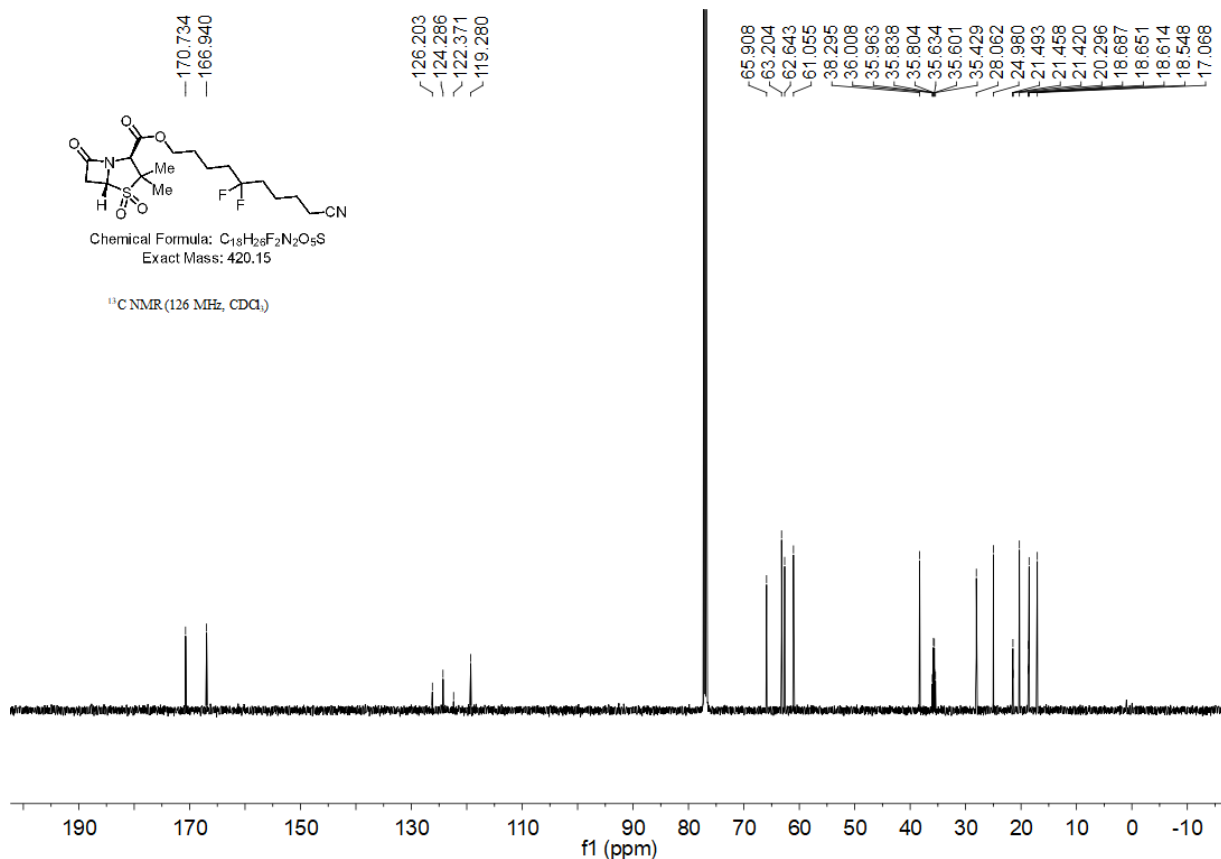

**(5*S*,8*S*)-5-Benzyl-14,14-difluoro-8-isobutyl-3,6,9-trioxo-1-phenyl-2-oxa-4,7,10-triazaheptadecan-17-yl 4-chlorobenzoate (10f)**

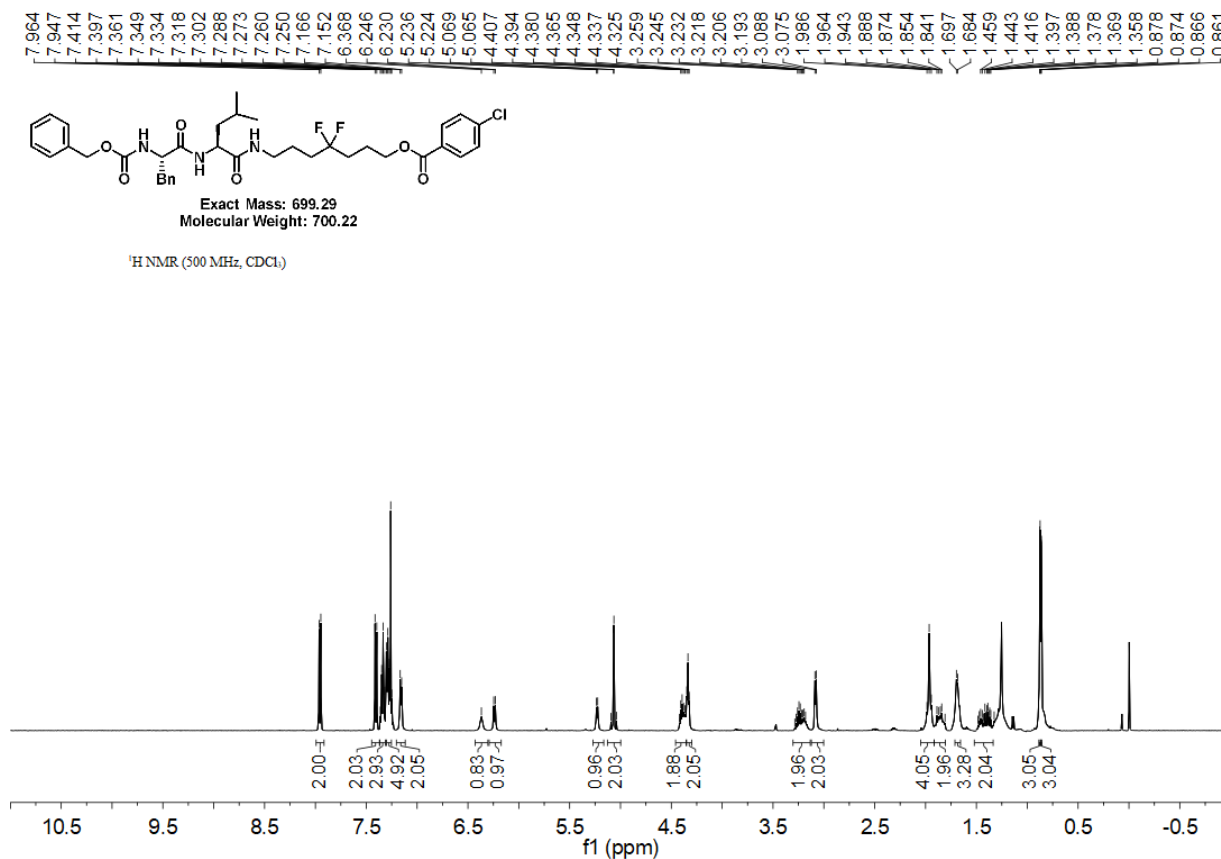

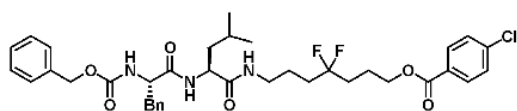

Exact Mass: 699.29  
Molecular Weight: 700.22

$^{19}\text{F}$  NMR (376 MHz,  $\text{CDCl}_3$ )

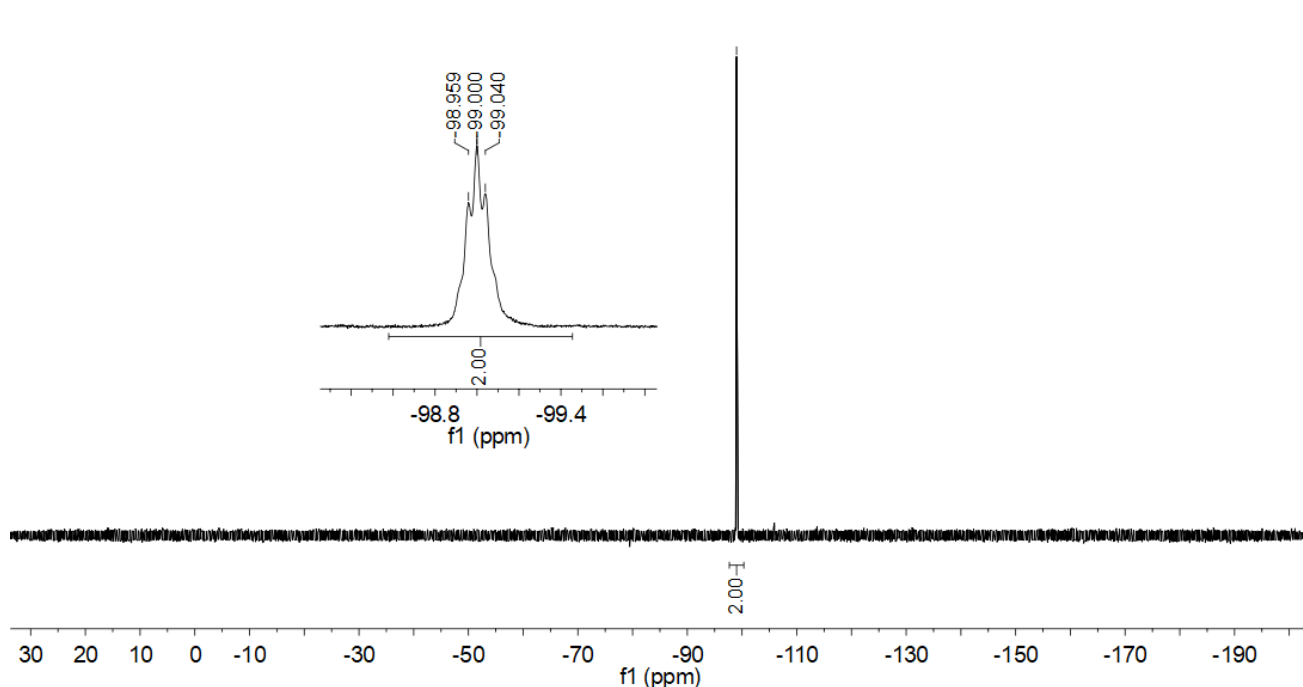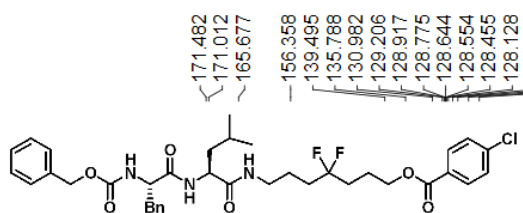

Exact Mass: 699.29  
Molecular Weight: 700.22

$^{13}\text{C}$  NMR (126 MHz,  $\text{CDCl}_3$ )

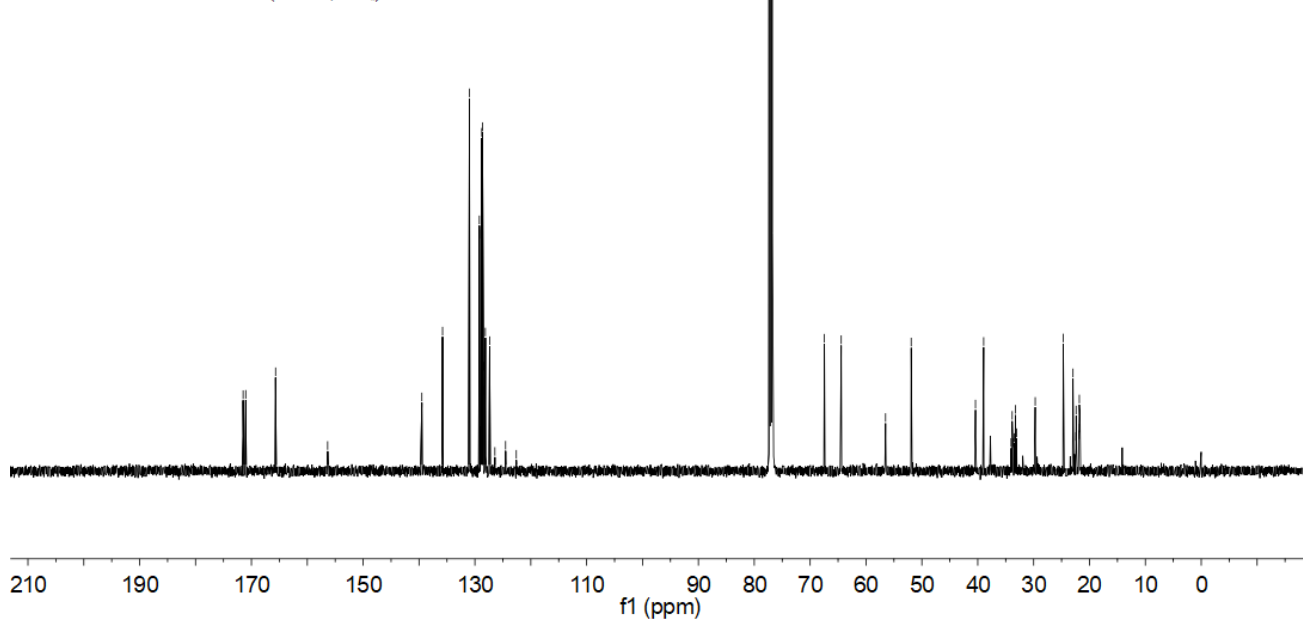

**1-Ethyl 9-(((3aR,5R,5aS,8aS,8bR)-2,2,7,7-tetramethyltetrahydro-5H-bis([1,3]dioxolo)[4,5-b:4',5'-d]pyran-5-yl)methyl) 5,5-difluorononanedioate (10g)**

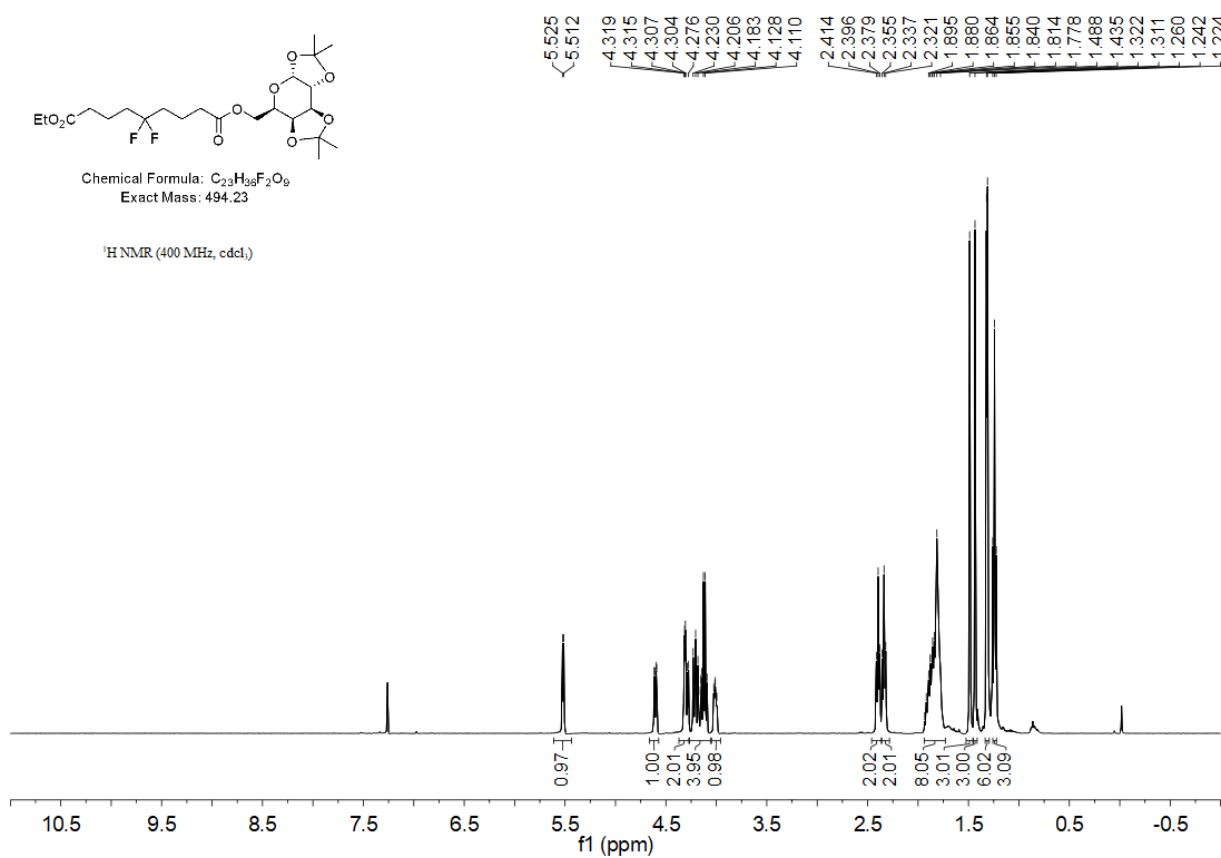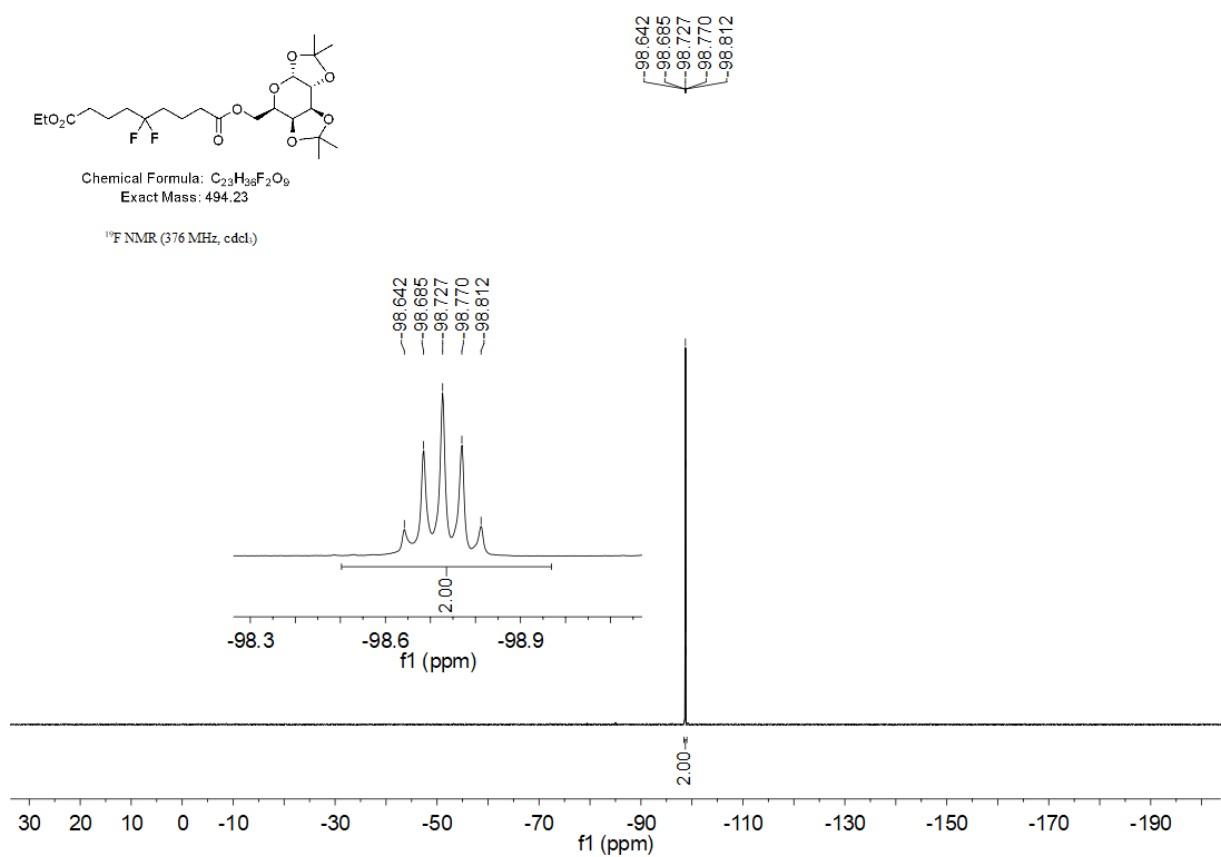

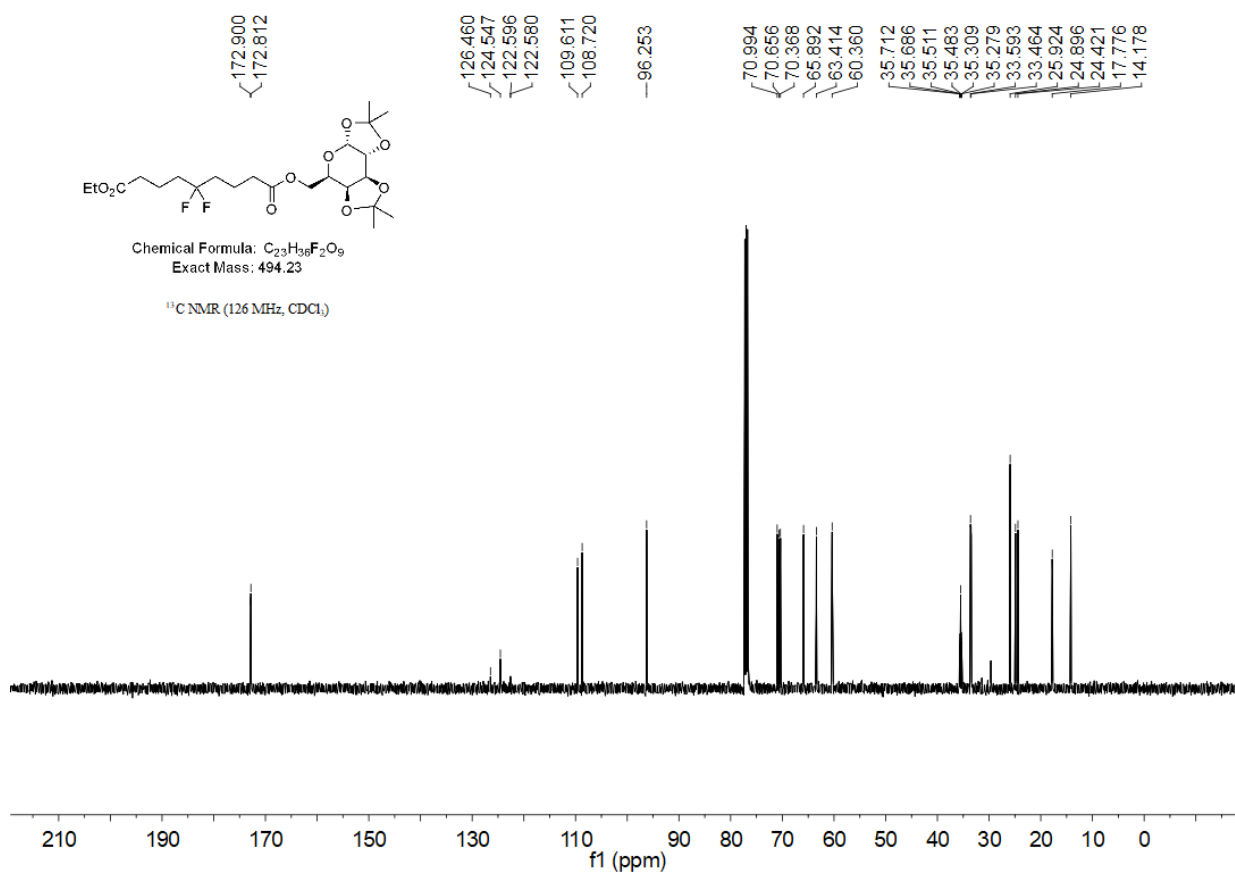

### 9-Ethoxy-5,5-difluoro-9-oxononyl 2-(3-cyano-4-isobutoxyphenyl)-4-methylthiazole-5-carboxylate (10h)

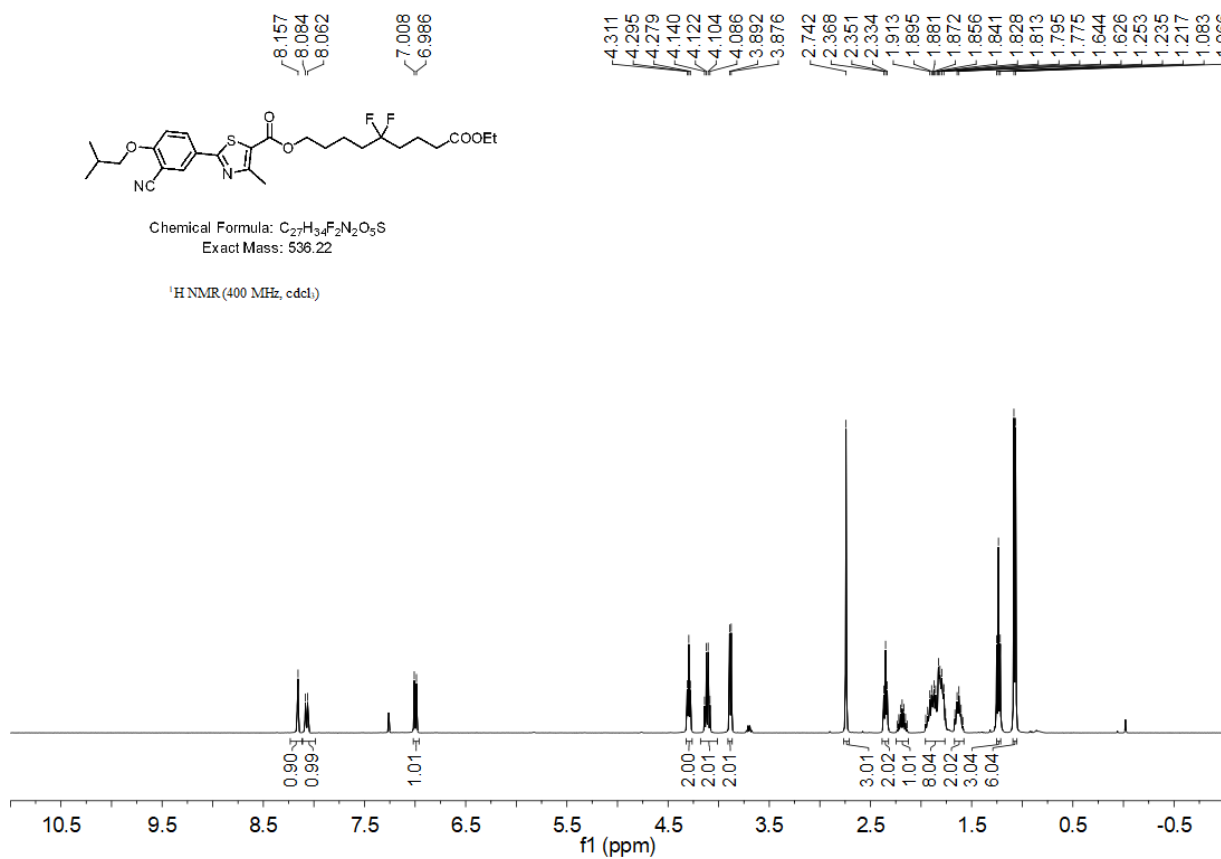

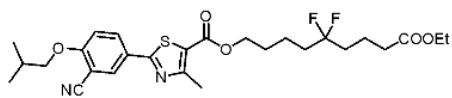

Chemical Formula:  $C_{27}H_{34}F_2N_2O_5S$   
Exact Mass: 536.22

$^{19}F$  NMR (376 MHz,  $cdCl_3$ )

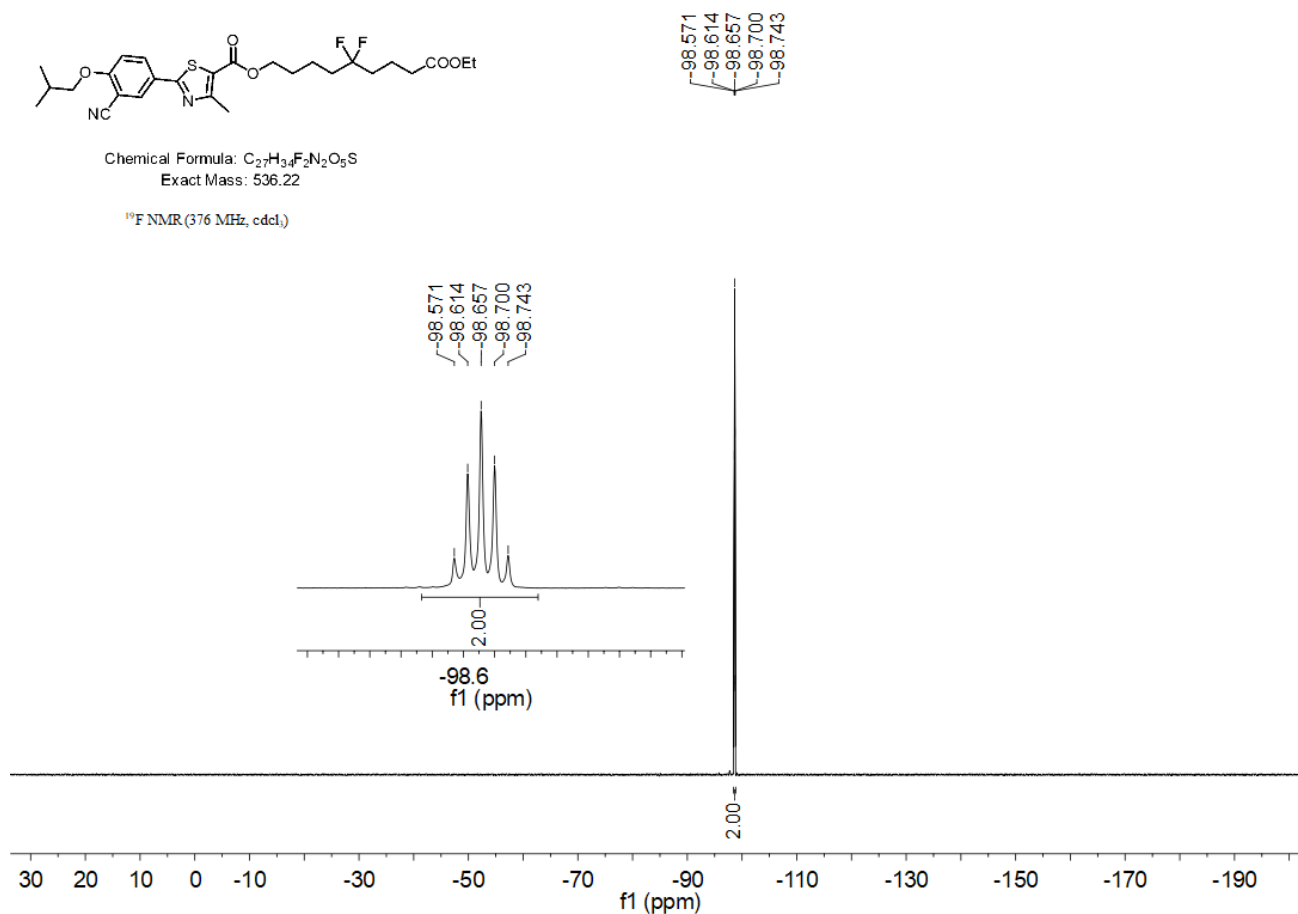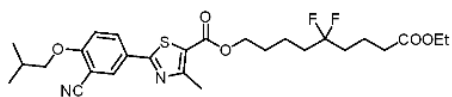

Chemical Formula:  $C_{27}H_{34}F_2N_2O_5S$   
Exact Mass: 536.22

$^{13}C$  NMR (126 MHz,  $CDCl_3$ )

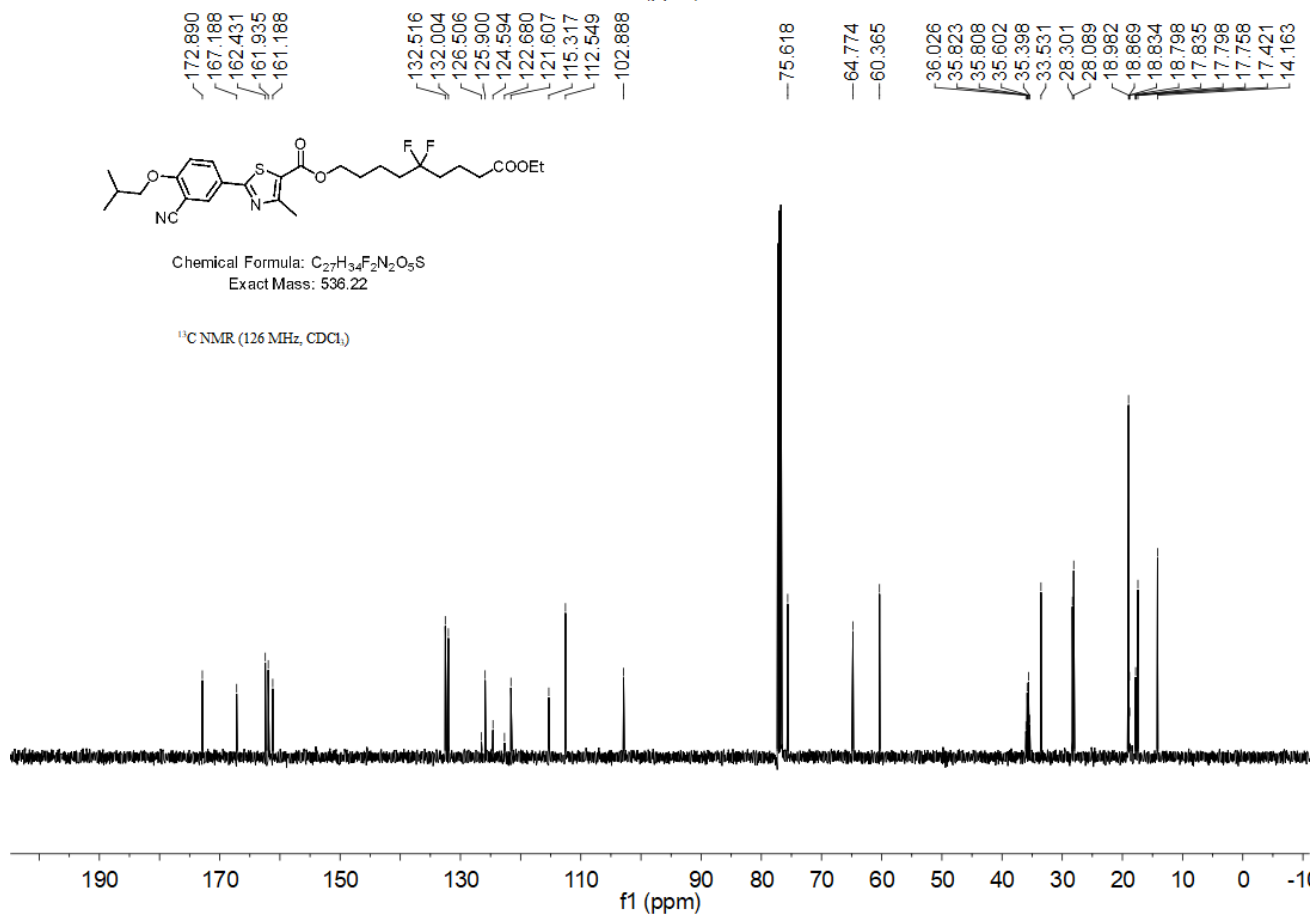

### 3,3-Difluoroheptane-1,7-diol (11d)

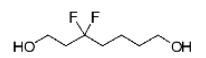

Chemical Formula:  $C_7H_{14}F_2O_2$   
Exact Mass: 168.0962

$^1H$  NMR (400 MHz,  $cdCl_3$ )

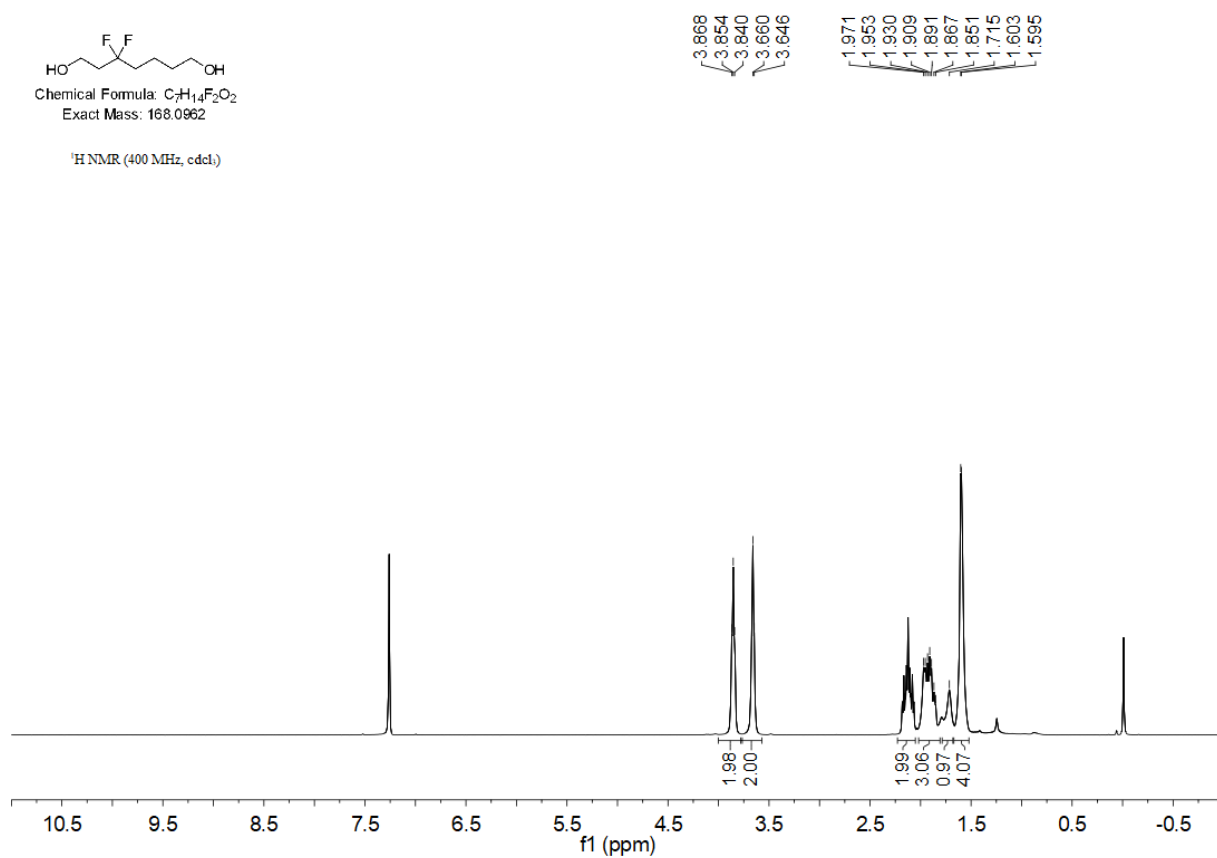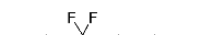

Chemical Formula:  $C_7H_{14}F_2O_2$   
Exact Mass: 168.0962

$^{19}F$  NMR (376 MHz,  $cdCl_3$ )

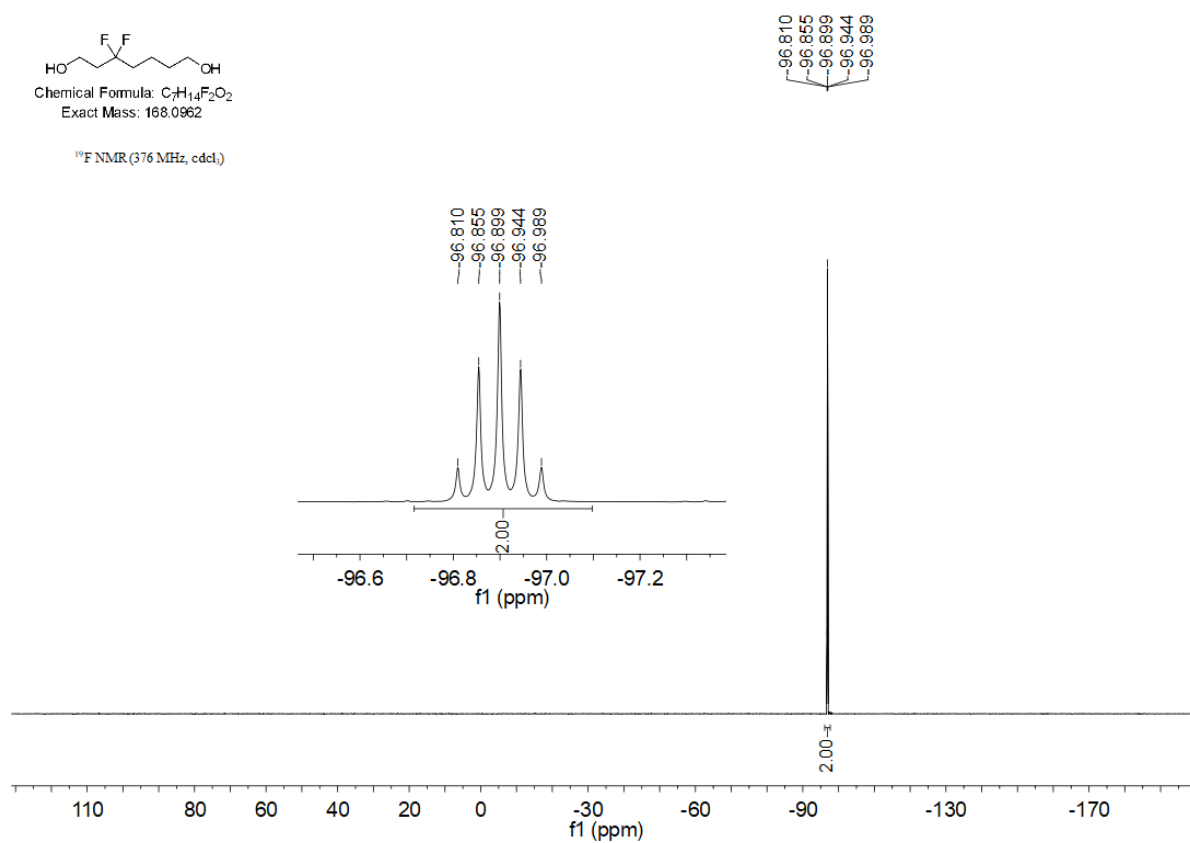

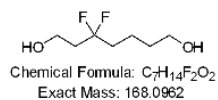

<sup>13</sup>C NMR (101 MHz, cdcl<sub>3</sub>)

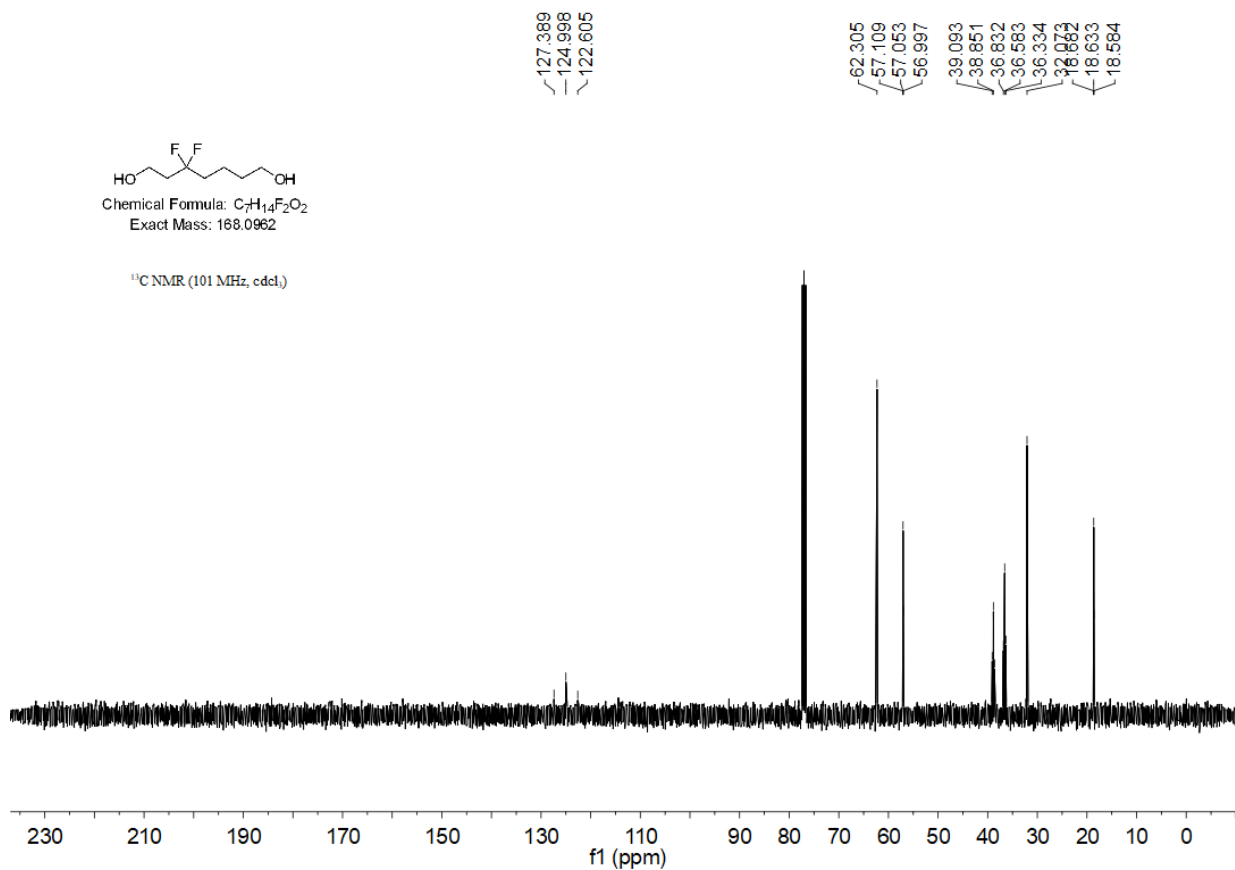

## 2,2-Difluorobutane-1,4-diol (11h)

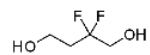

Chemical Formula: C<sub>4</sub>H<sub>8</sub>F<sub>2</sub>O<sub>2</sub>  
 Exact Mass: 126.0492

<sup>1</sup>H NMR (400 MHz, cdcl<sub>3</sub>)

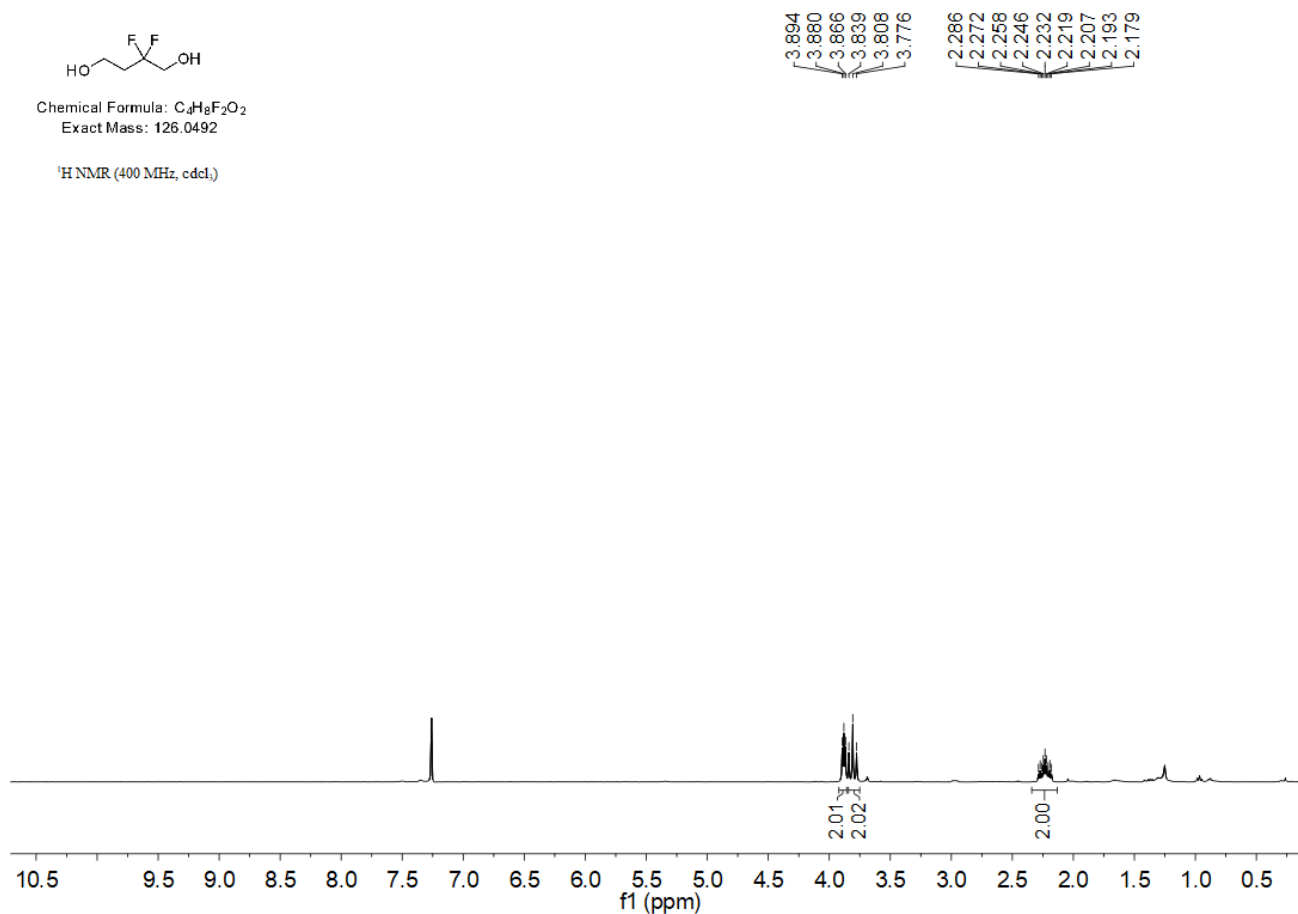



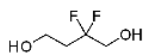

Chemical Formula:  $C_4H_8F_2O_2$   
Exact Mass: 126.0492

$^{19}F$  NMR (376 MHz,  $cdcl_3$ )

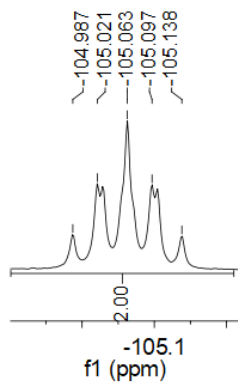

104.987  
105.021  
105.063  
105.097  
105.138

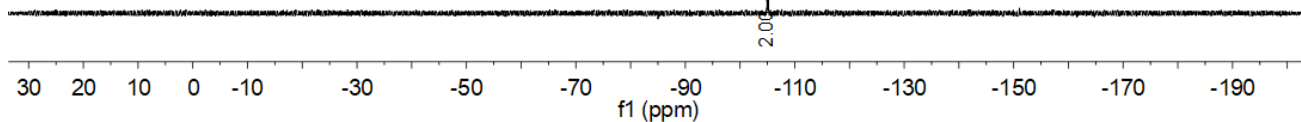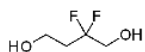

Chemical Formula:  $C_4H_8F_2O_2$   
Exact Mass: 126.0492

$^{13}C$  NMR (126 MHz,  $CDCl_3$ )

124.798  
122.871  
120.940

64.549  
64.283  
64.019  
56.856  
56.804  
56.752

37.089  
36.895  
36.699

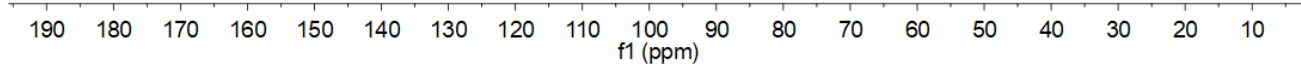

### 3-Cyclohexyl-3,3-difluoropropan-1-ol (11l)

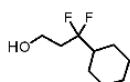

Chemical Formula:  $C_9H_{18}F_2O$   
Exact Mass: 178.1169

$^1H$  NMR (400 MHz,  $cdCl_3$ )

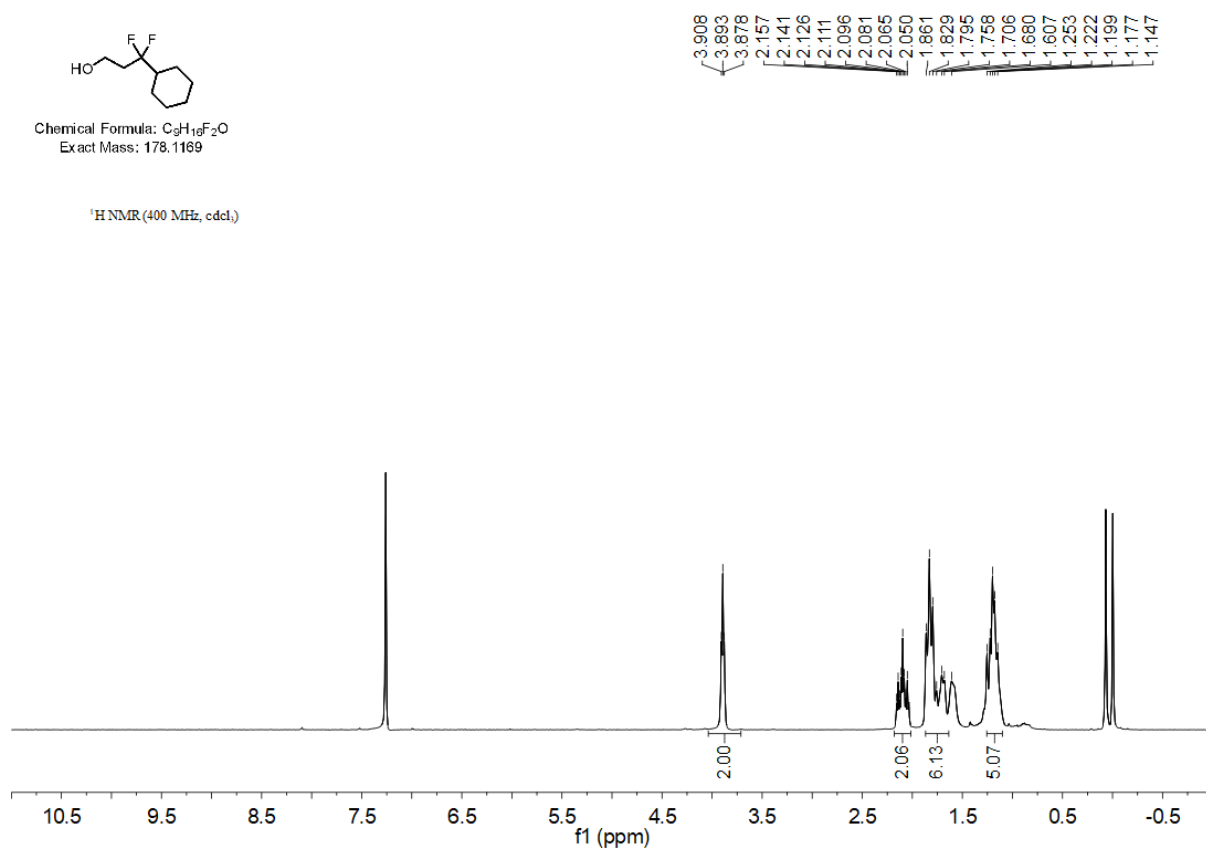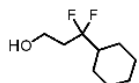

Chemical Formula:  $C_9H_{18}F_2O$   
Exact Mass: 178.1169

$^{19}F$  NMR (376 MHz,  $cdCl_3$ )

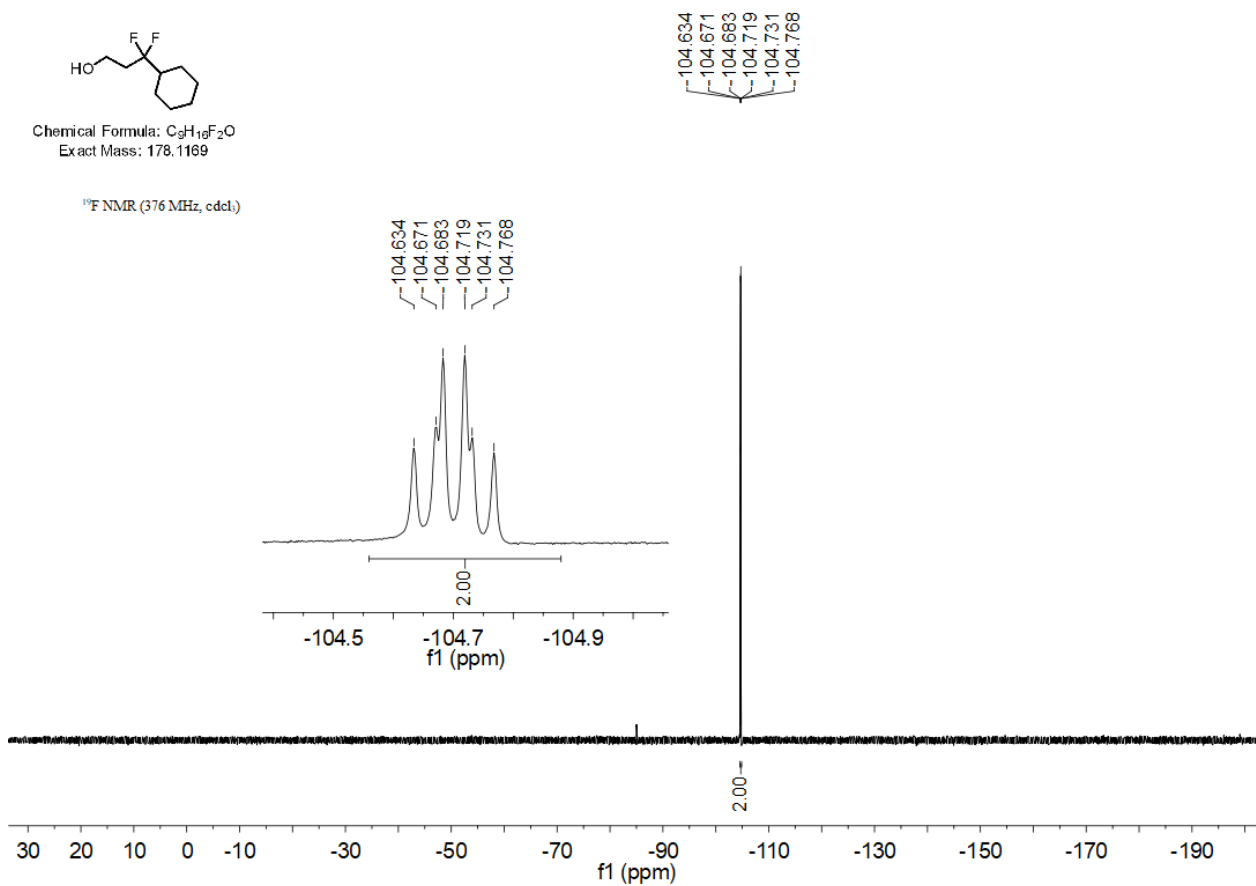

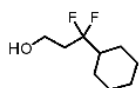

Chemical Formula:  $C_8H_{10}F_2O$   
Exact Mass: 178.1169

$^{13}C$  NMR (126 MHz,  $CDCl_3$ )

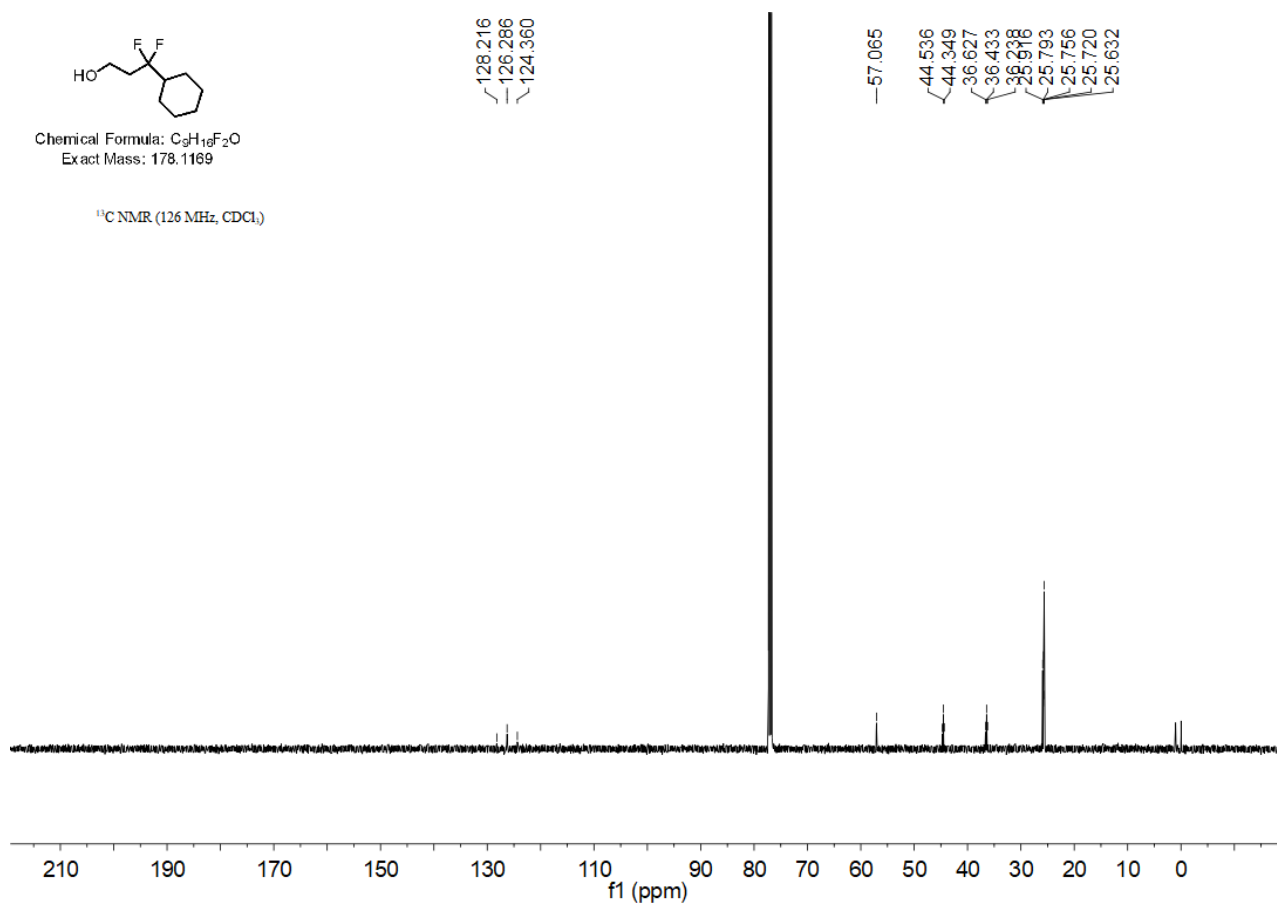

### (3,3-difluoropent-4-yn-1-yl) Dimethyl(phenyl)silane (12)

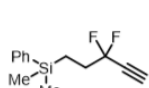

Exact Mass: 238.10  
Molecular Weight: 238.35

$^1H$  NMR (400 MHz,  $cdcl_3$ )

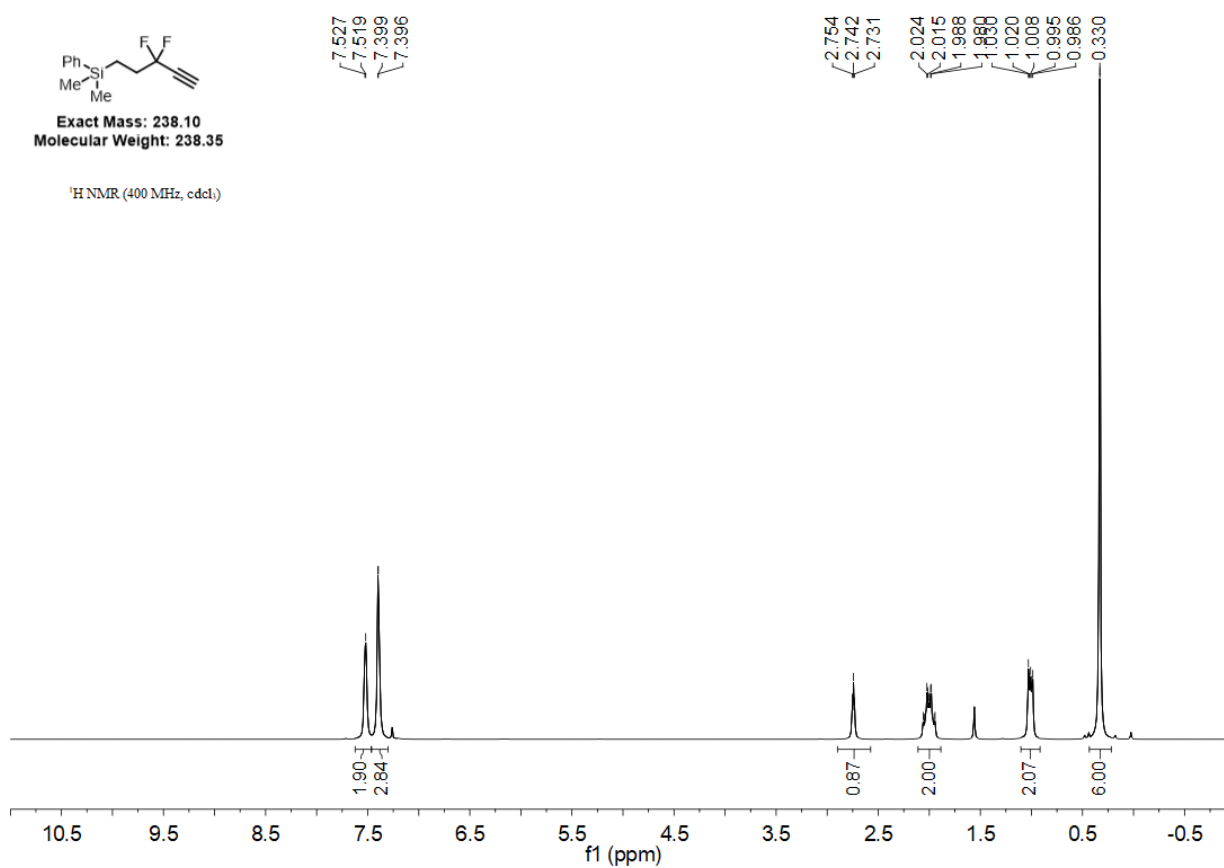

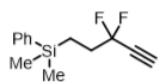

Exact Mass: 238.10  
Molecular Weight: 238.35

$^{19}\text{F}$  NMR (376 MHz,  $\text{cdcl}_3$ )

85.930  
85.942  
85.968  
85.981  
86.007  
86.019

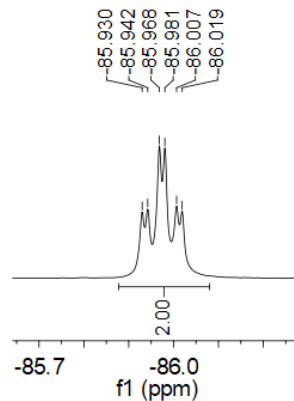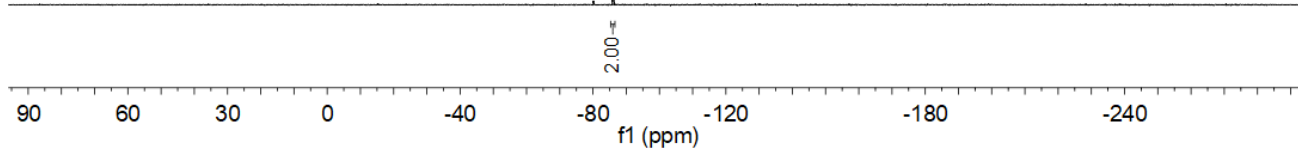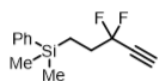

Exact Mass: 238.10  
Molecular Weight: 238.35

$^{13}\text{C}$  NMR (126 MHz,  $\text{CDCl}_3$ )

137.761  
133.491  
129.235  
127.940  
116.948  
115.091  
113.237  
76.882  
76.554  
76.226  
75.206  
75.152  
75.098  
34.170  
33.956  
33.742  
-8.194  
-3.371

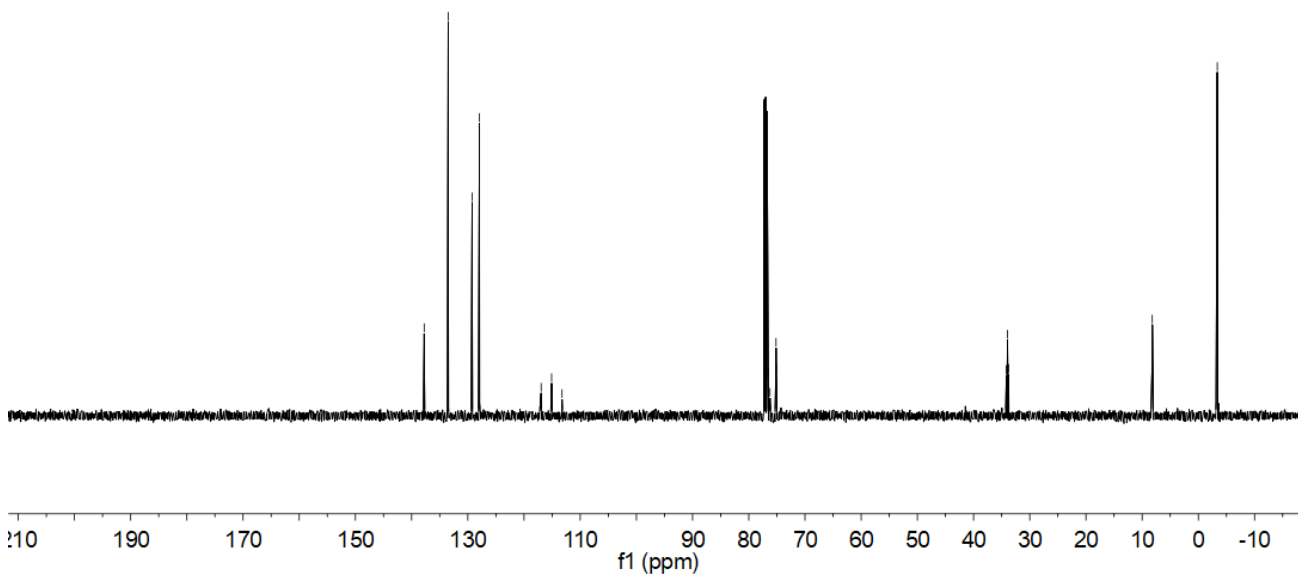

**(E)-6-(dimethyl(phenyl)silyl)-4,4-Difluoro-1-phenylhex-2-en-1-one (13)**

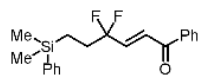

Exact Mass: 344.14  
Molecular Weight: 344.48

<sup>1</sup>H NMR (500 MHz, CDCl<sub>3</sub>)

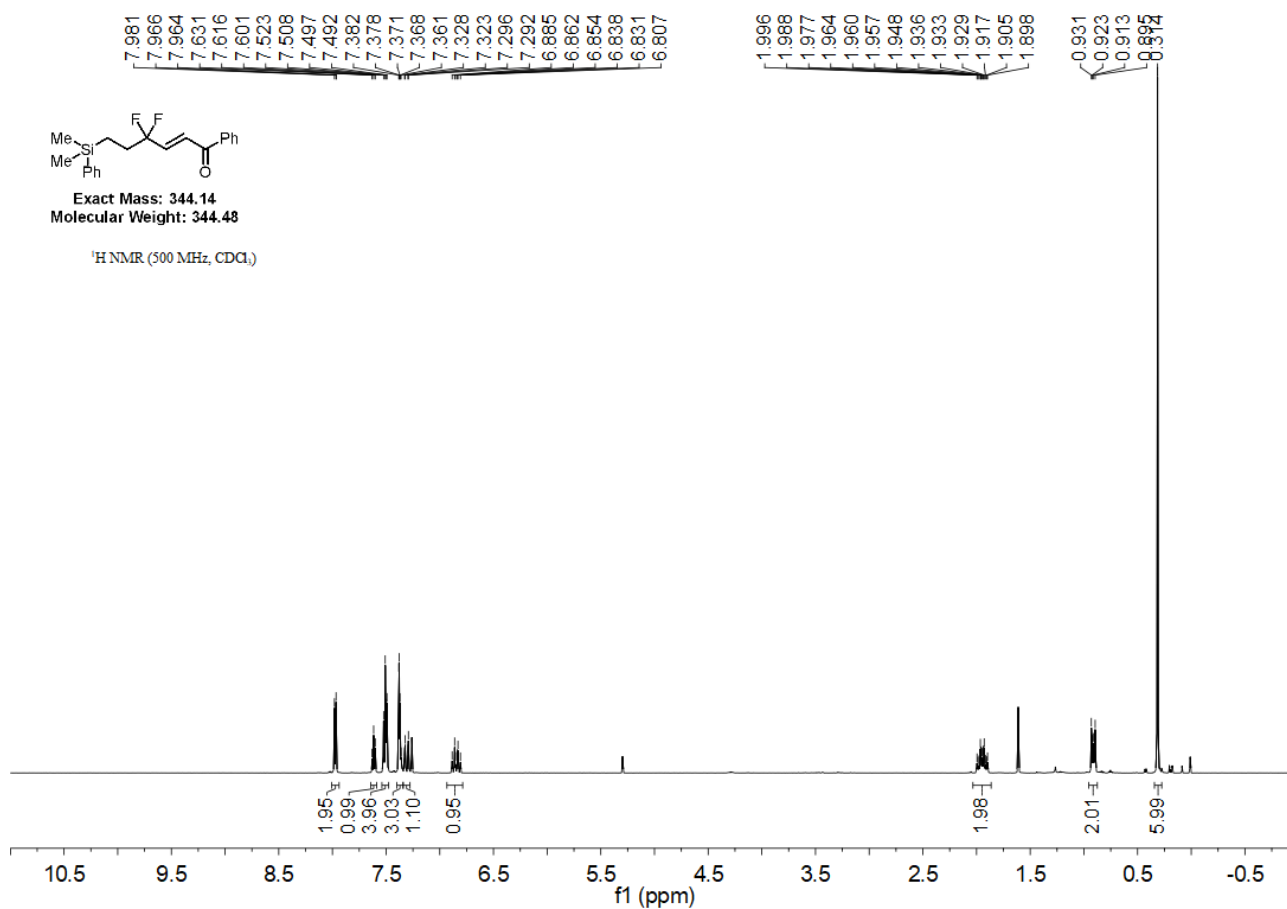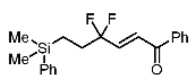

Exact Mass: 344.14  
Molecular Weight: 344.48

<sup>19</sup>F NMR (376 MHz, cdcl<sub>3</sub>)

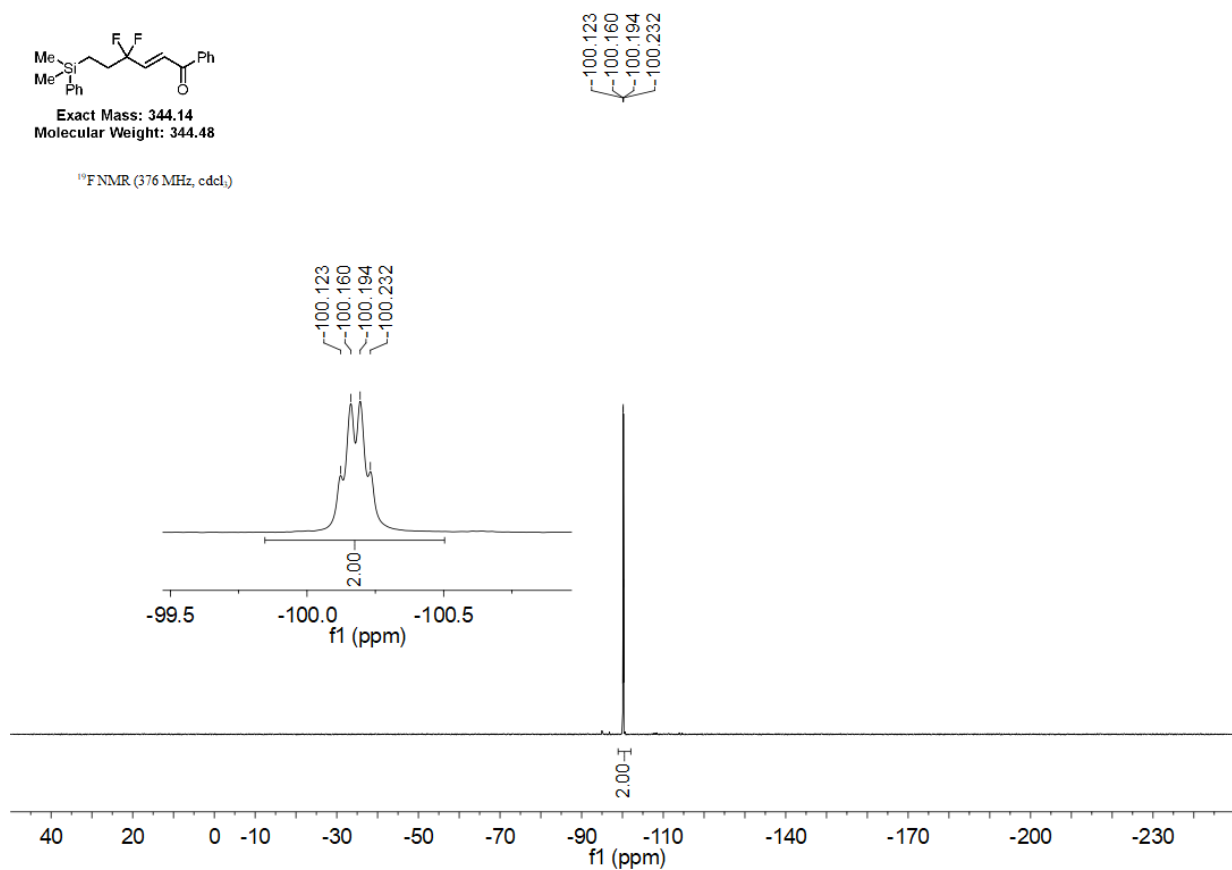

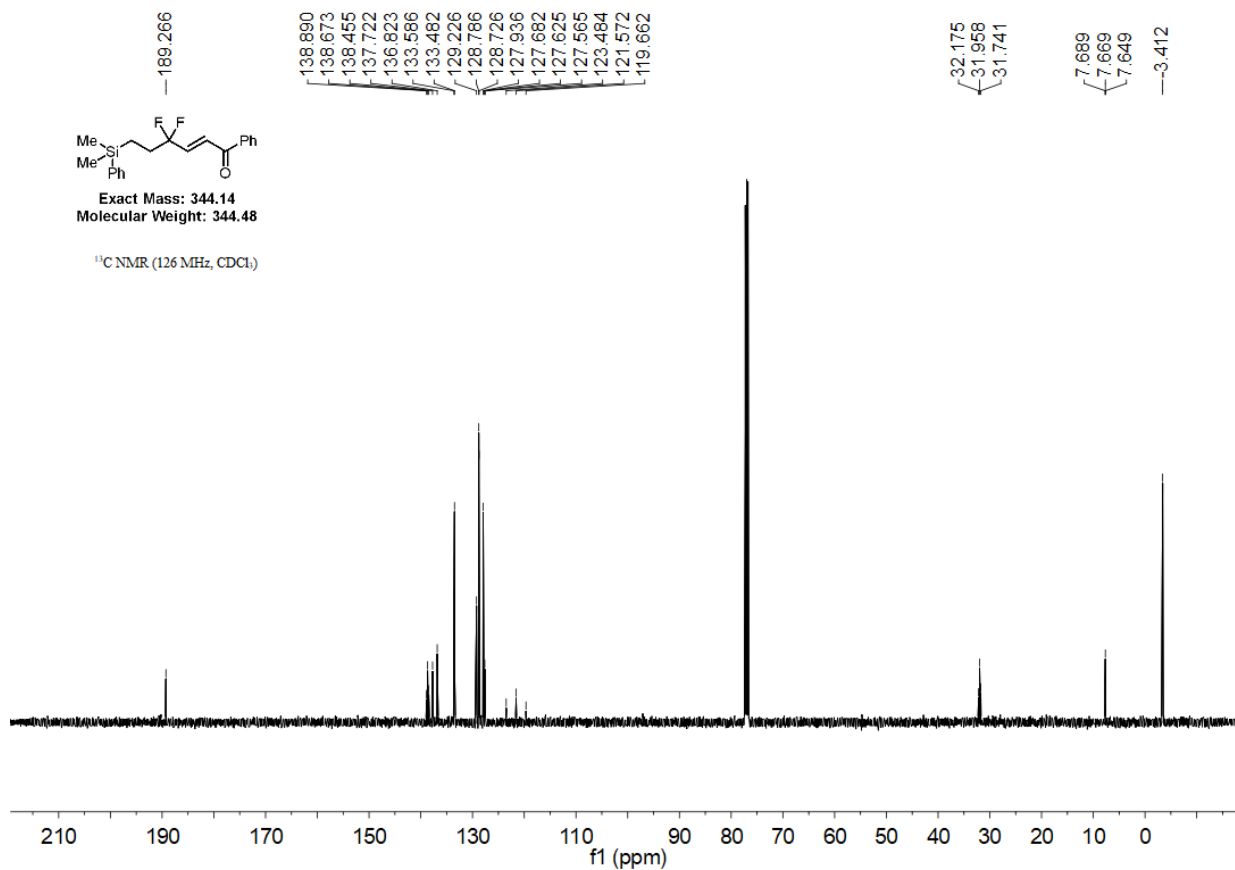

**6-(dimethyl(phenyl)silyl)-4,4-Difluoro-3-(1-methyl-1H-indol-3-yl)-1-phenylhexan-1-one (14)**

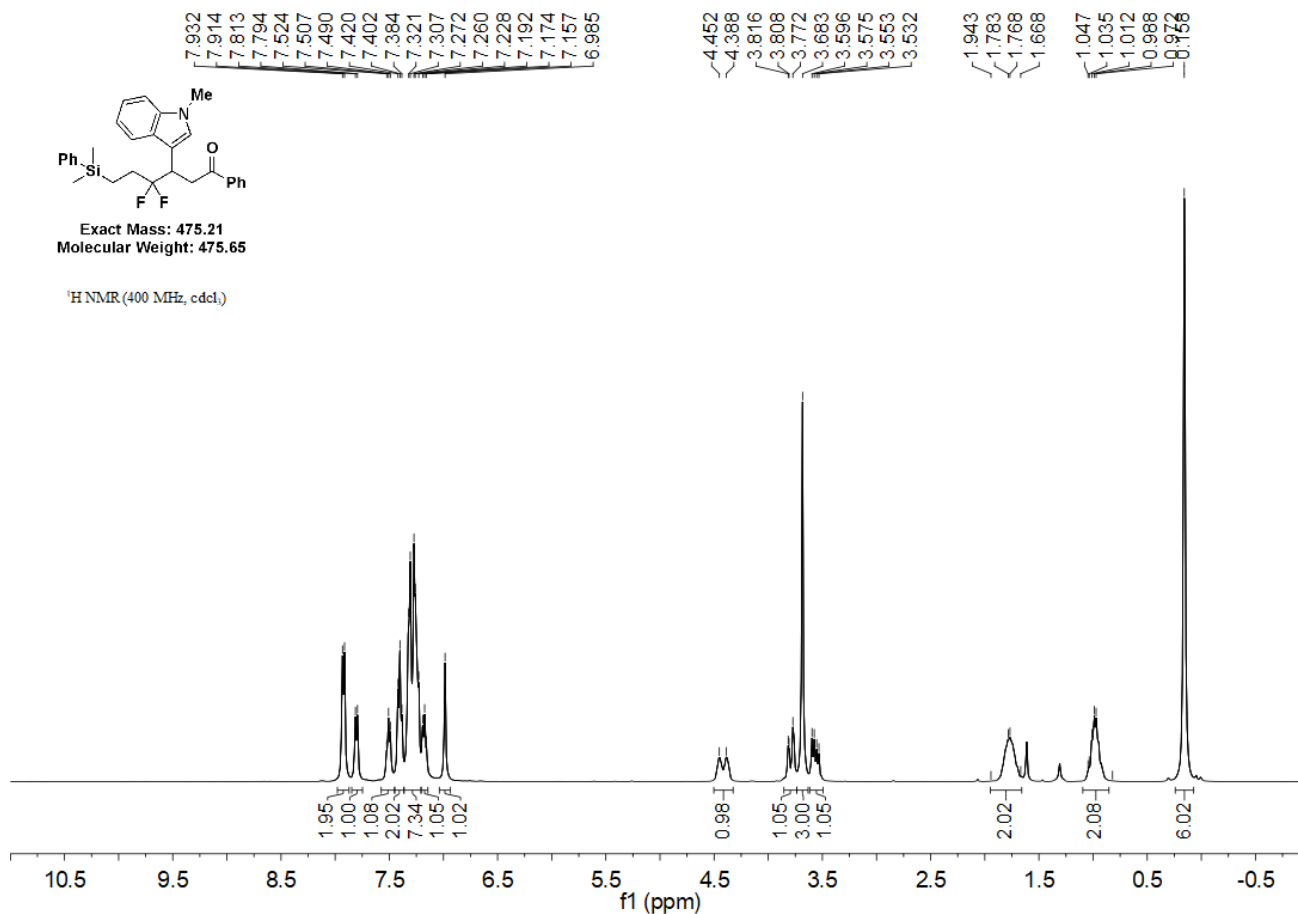

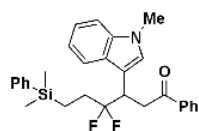

Exact Mass: 475.21  
Molecular Weight: 475.65

$^{19}\text{F}$  NMR (376 MHz,  $\text{CDCl}_3$ )

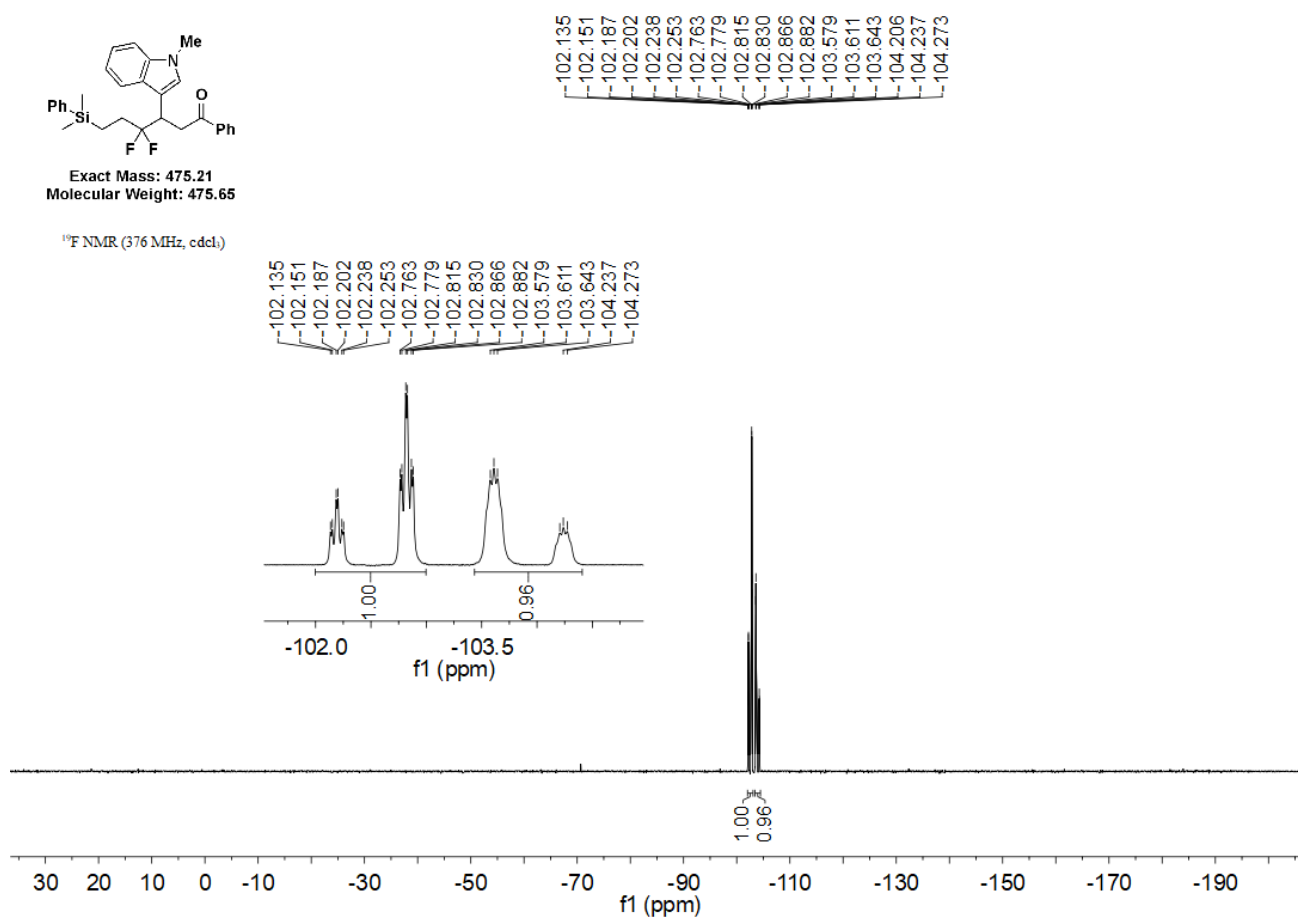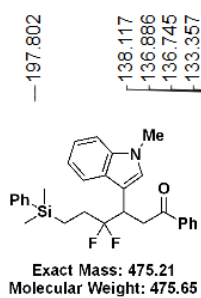

Exact Mass: 475.21  
Molecular Weight: 475.65

$^{13}\text{C}$  NMR (126 MHz,  $\text{CDCl}_3$ )

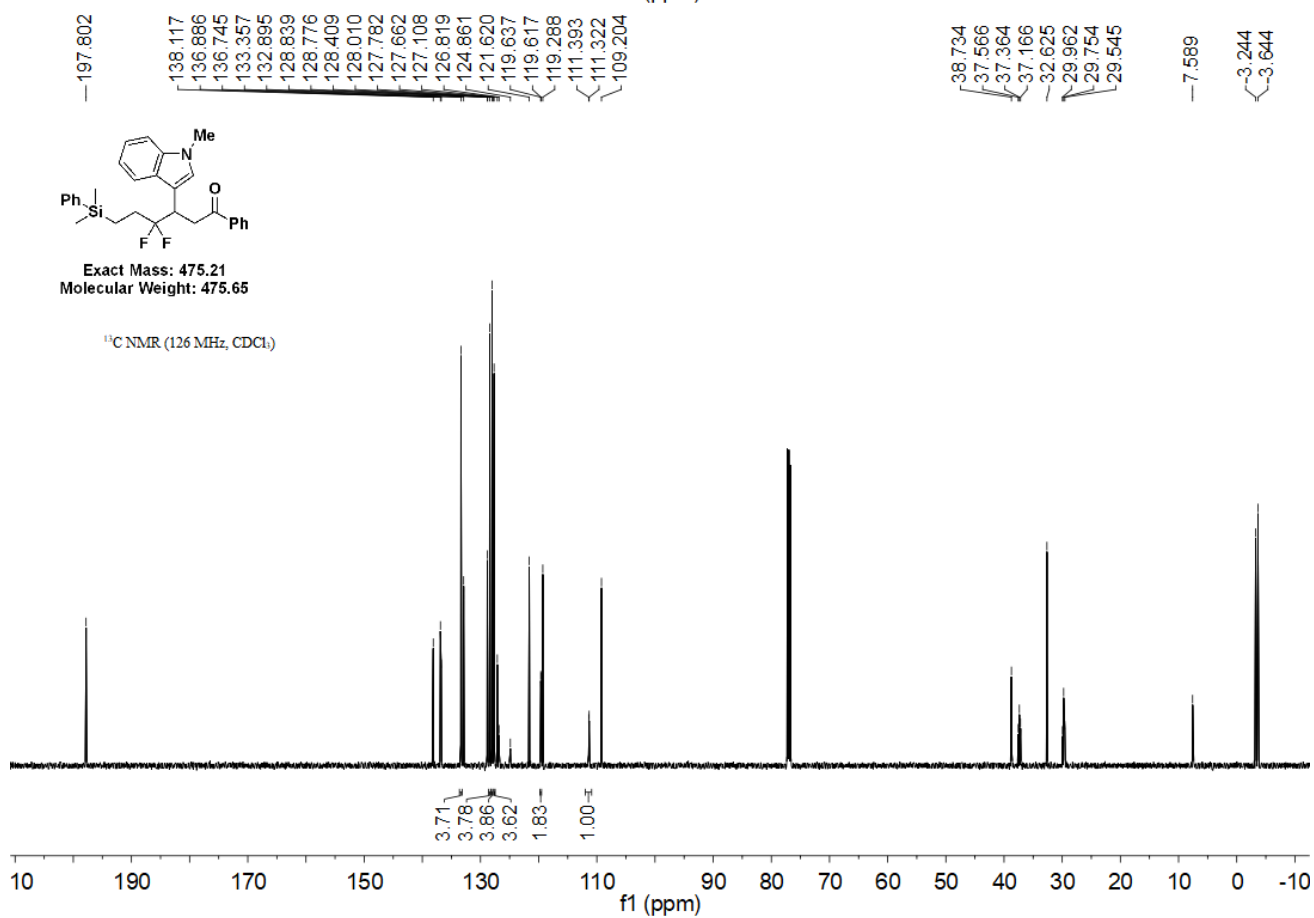

# 4,4-Difluoro-6-hydroxy-3-(1-methyl-1H-indol-3-yl)-1-phenylhexan-1-one (15)

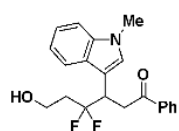

Exact Mass: 357.15  
Molecular Weight: 357.40

<sup>1</sup>H NMR (400 MHz, cdcl<sub>3</sub>)

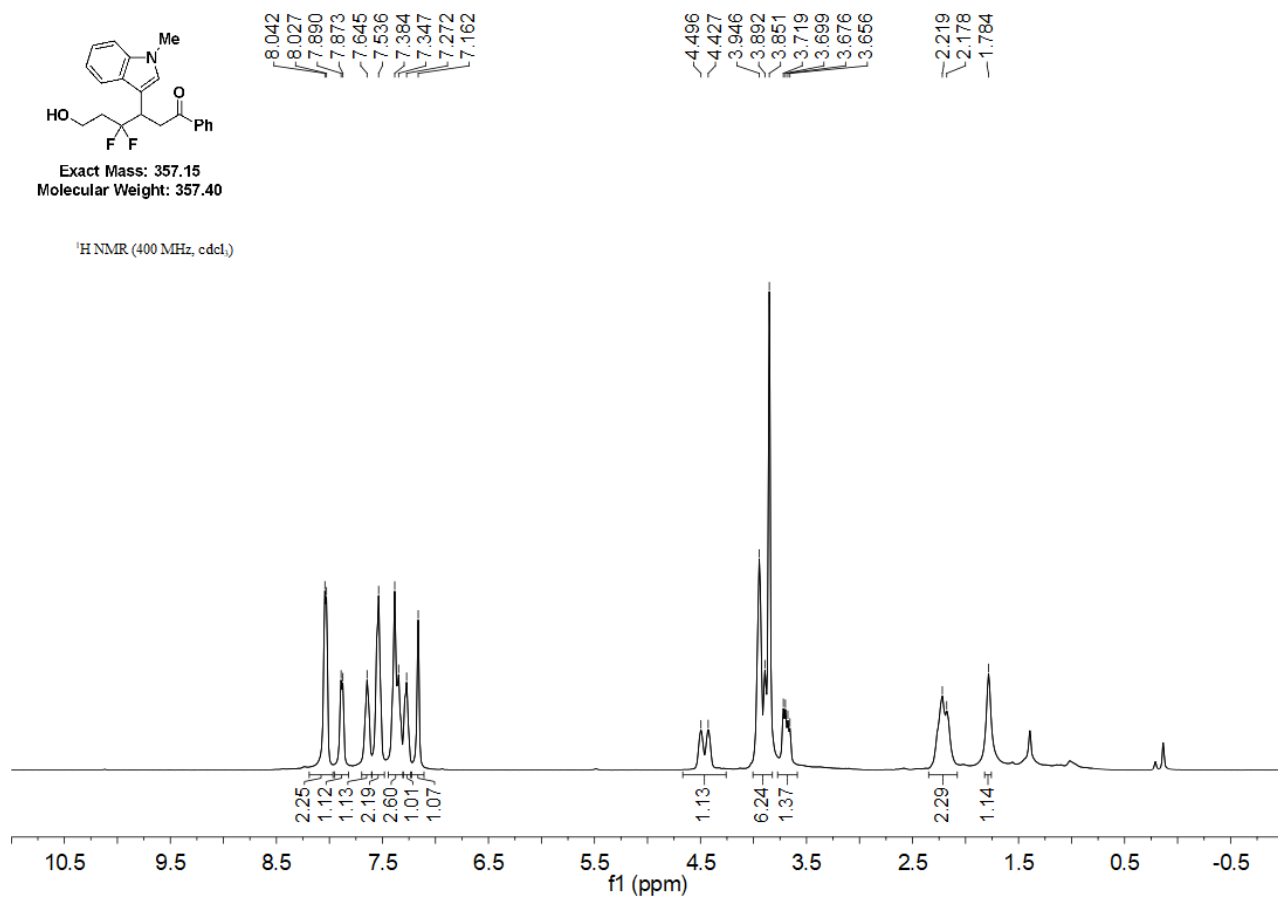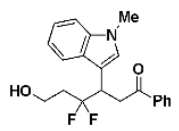

Exact Mass: 357.15  
Molecular Weight: 357.40

<sup>19</sup>F NMR (376 MHz, cdcl<sub>3</sub>)

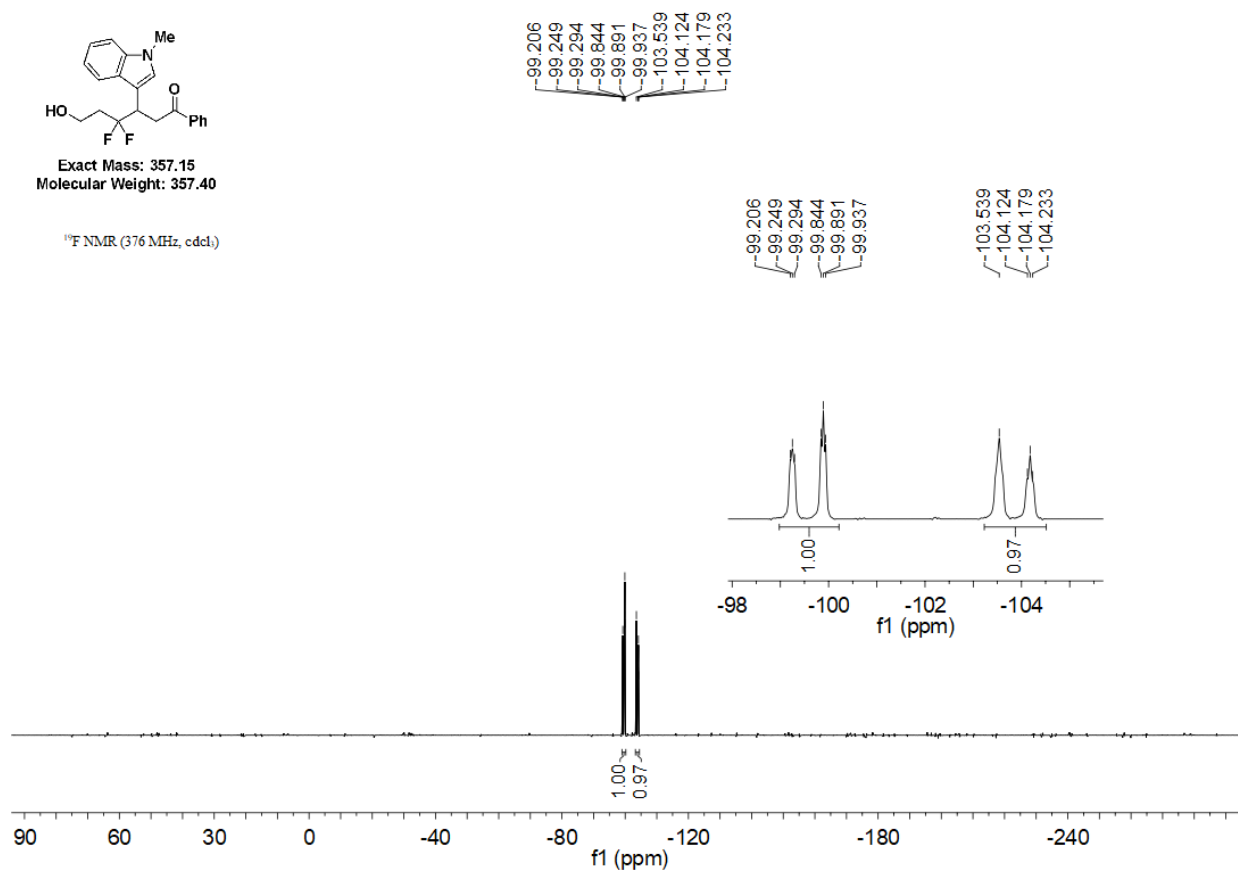



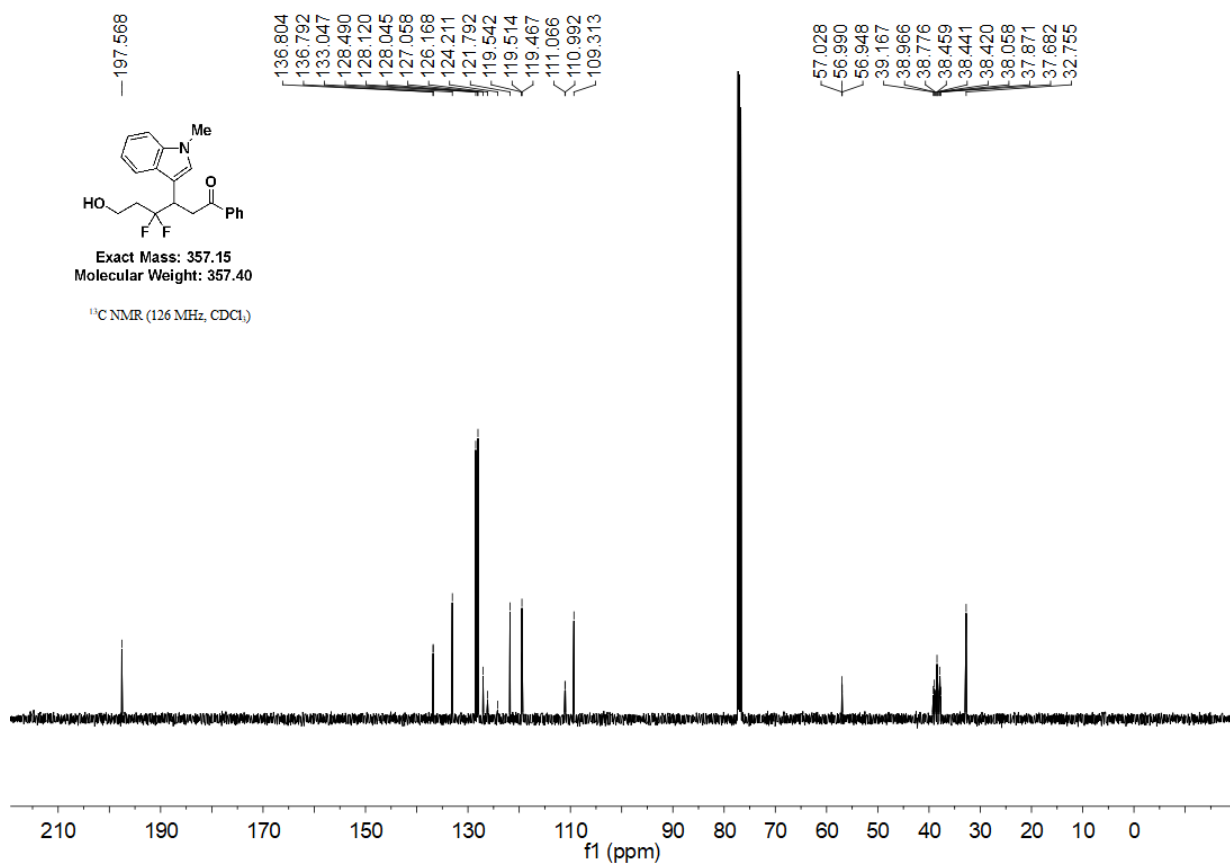

### (3-(3,4-Dihydronaphthalen-1-yl)propyl)trimethylsilane (17)

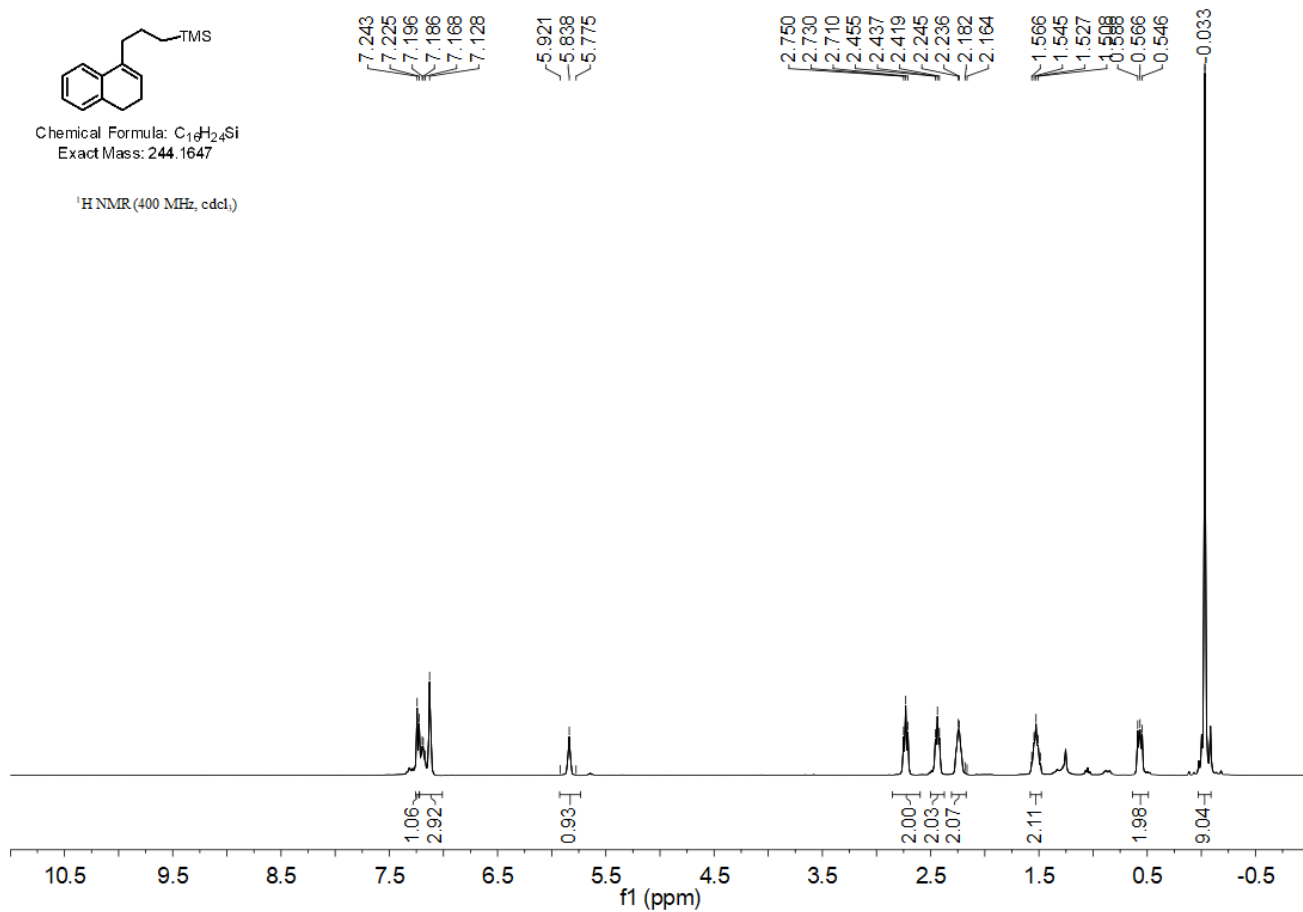

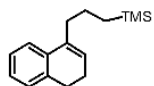

Chemical Formula:  $C_{19}H_{24}Si$   
Exact Mass: 244.1647

$^{13}C$  NMR (101 MHz,  $cdCl_3$ )

136.734  
136.549  
135.062  
127.514  
126.404  
126.245  
124.732  
122.595

36.754  
28.494  
23.110  
23.085  
16.842  
-1.624

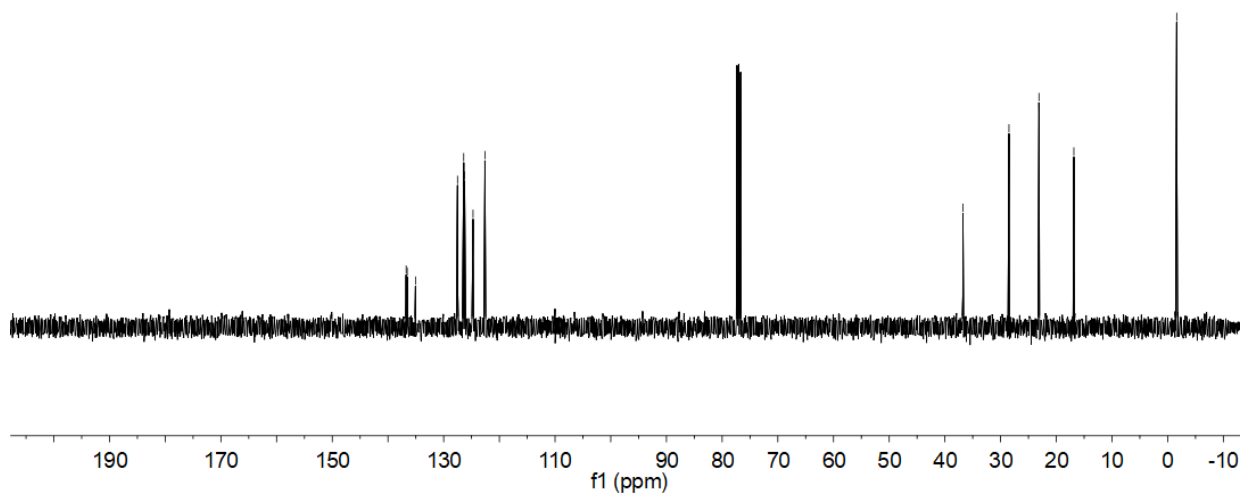

### 3-(3,4-Dihydronaphthalen-1-yl)-2,2-difluoropropyl benzoate (18)

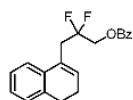

Chemical Formula:  $C_{20}H_{18}F_2O_2$   
Exact Mass: 328.1275

$^1H$  NMR (400 MHz,  $cdCl_3$ )

8.073  
8.055  
7.628  
7.610  
7.591  
7.495  
7.476  
7.457  
7.313  
7.136  
6.100  
4.505  
4.474  
4.443  
3.246  
3.207  
3.167  
2.781  
2.761  
2.741  
2.311  
2.292  
2.281  
2.261

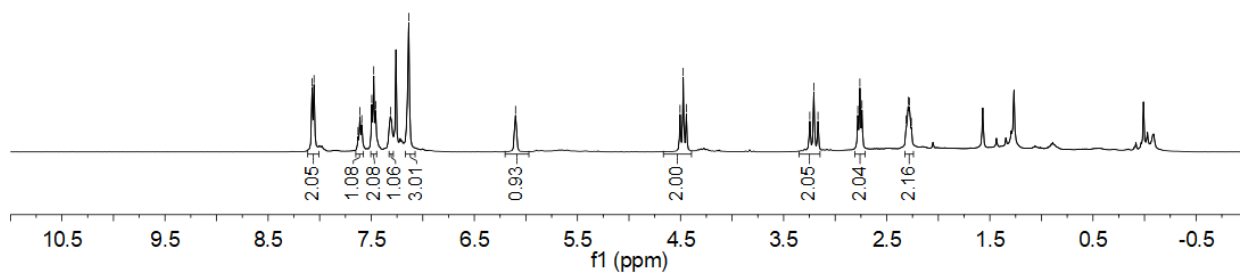

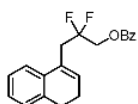

Chemical Formula:  $C_{20}H_{13}F_2O_2$   
Exact Mass: 328.1275

$^{19}F$  NMR (376 MHz,  $cdCl_3$ )

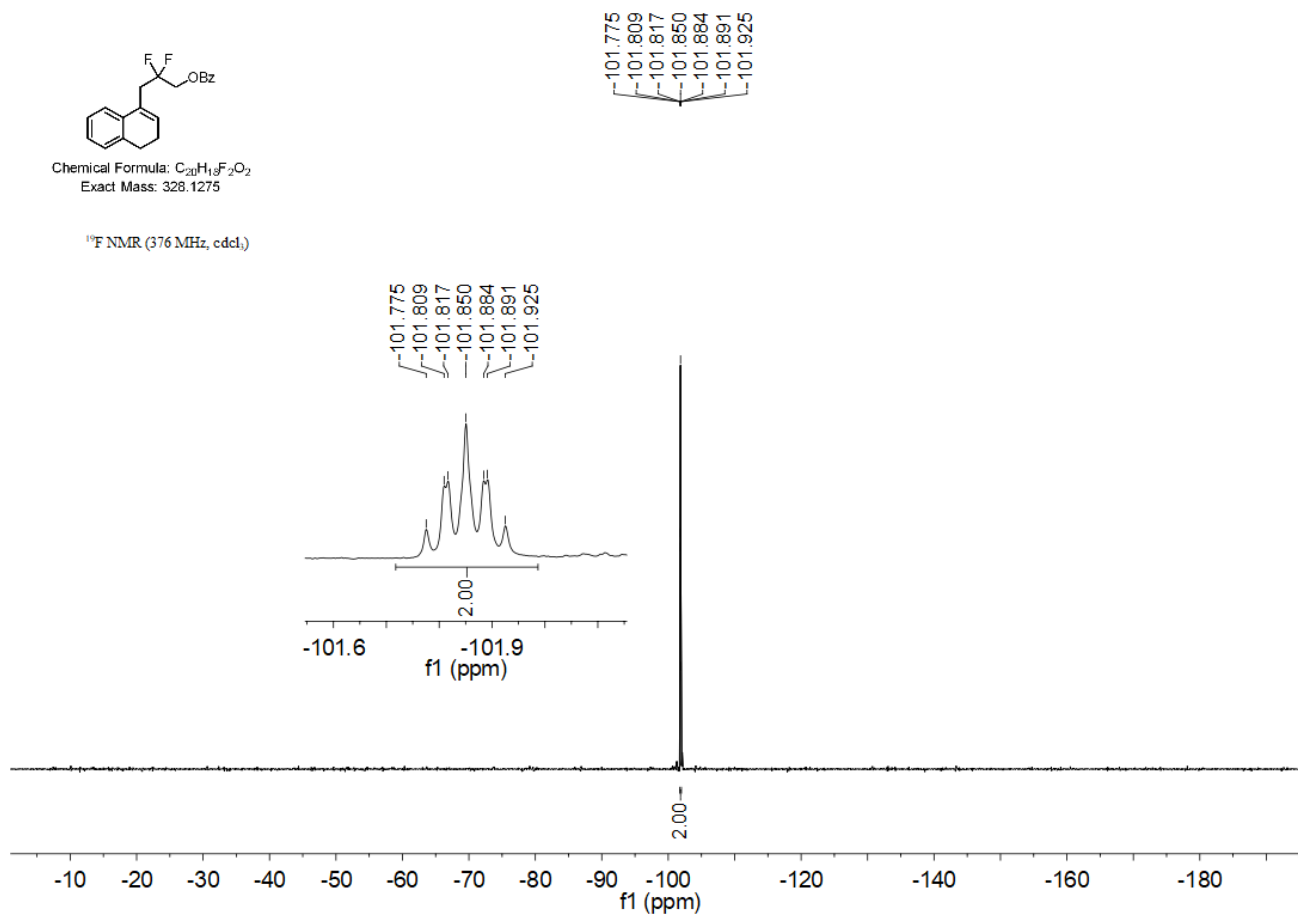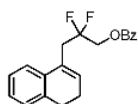

Chemical Formula:  $C_{20}H_{13}F_2O_2$   
Exact Mass: 328.1275

$^{13}C$  NMR (126 MHz,  $CDCl_3$ )

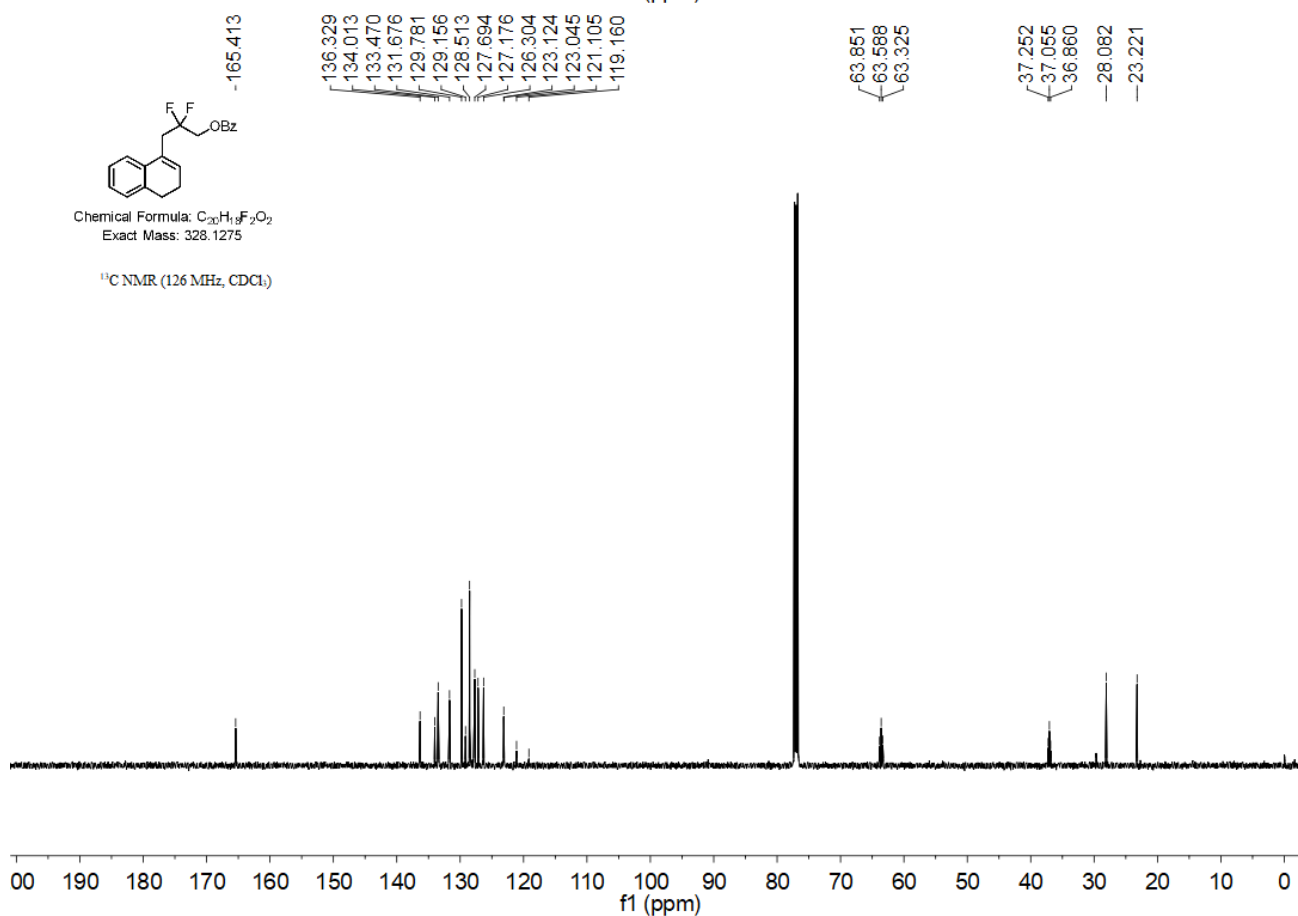

Supplement: d1sc07061d1.pdf [file d1sc07061d1.pdf]
